# Supplementary material for: Catalytic Enantioselective Synthesis of 3-Piperidines from Arylboronic Acids and Pyridine
Source: PubMed Central journal article supplement (PMC10326878; doi:10.1021/jacs.3c05044), 2023-06-22
Supplement: ja3c05044_si_001.pdf [file ja3c05044_si_001.pdf]

# Catalytic Enantioselective Synthesis of 3-Piperidines from Arylboronic Acids and Pyridine

Sourabh Mishra, Sedef Karabiyikoglu, Stephen P. Fletcher\*

Department of Chemistry, Chemistry Research Laboratory, University of Oxford, Oxford OX1 3TA, United Kingdom

## Supporting Information – Experimental procedures and Data

### Table of Contents

|                                                            |    |
|------------------------------------------------------------|----|
| 1. General Information .....                               | 2  |
| 2. Synthesis of Dihydropyridines.....                      | 3  |
| 3. General Procedure for Rh-Catalyzed Cross-Coupling ..... | 6  |
| 4. Derivatization of Chiral Tetrahydropyridines .....      | 54 |
| 5. References .....                                        | 59 |
| 6. NMR Spectra.....                                        | 60 |

## 1. General Information

All reactions were carried out in anhydrous solvents with continuous magnetic stirring under an inert argon atmosphere. Heating was performed using DrySyn heating blocks.

Nuclear magnetic resonance (NMR) spectroscopy measurements were carried out at room temperature.  $^1\text{H}$  NMR,  $^{13}\text{C}$  NMR,  $^{19}\text{F}$  NMR, COSY, HSQC, HMBC and NOESY experiments were carried out using Bruker AVIII HD 400 (400/100 MHz) or AVIII HD 400 (500/125 MHz) spectrometers. Chemical shifts ( $\delta$ ) are reported in ppm relative to the residual solvent peak with corresponding coupling constants ( $J$ ) in Hertz (Hz) and multiplicities (s: singlet, d: doublet, t: triplet, q: quartet, m: multiplet and combinations of these). Assignment follows HSQC, COSY, HMBC or/and NOESY spectra, chemical shift and coupling constant analysis.

Optical rotations ( $[\alpha]_{25}^{\text{D}}$ ) were recorded using a Perkin Elmer-241 Polarimeter. Concentrations (c) are reported in g/100 mL.

Chiral SFC (supercritical fluid chromatography) separations were conducted on a Waters Acquity UPC2 system using Waters Empower software. Solvents used were of HPLC grade (Fisher Scientific, Sigma Aldrich or Rathburn). Chiralpak columns (150x3 mm, particle size 3  $\mu\text{m}$ ) were used at 1500 PSI, 30  $^{\circ}\text{C}$ , flow: 1.5 mL/min under one of the following gradients- **Gradient 1**: 1% to 30% MeOH in 5 min, 30% to 50% MeOH in 0.5 min, hold 50% MeOH for 2 min; **Gradient 2**: 1% to 50% MeOH in 2 min, hold 50% MeOH for 5 min; **Gradient 3**: 0% to 15% MeOH in 7.5 min

High Resolution Mass spectra were carried out on a Walters BioAccord LC-MS System using Electron spray ionisation (ESI<sup>+</sup>) loop injection MS at the University of Oxford.

Commercially available reagents and ligands were purchased from Sigma Aldrich, Alfa Aesar, Acros Organics, Fluorochem and Strem Chemicals and were used without further purification unless stated otherwise.  $[\text{Rh}(\text{cod})\text{OH}]_2$  was bought from Sigma Aldrich. All aryl and heteroarylboronic acids were purchased and used without additional purification unless stated otherwise. Dry solvents were purchased from Thermo Scientific<sup>TM</sup>, Extra Dry over Molecular Sieve, Stabilized, AcroSeal<sup>TM</sup> and were degassed with argon prior to usage. Deuterated solvents were purchased from Sigma Aldrich.

## 2. Synthesis of Dihydropyridines

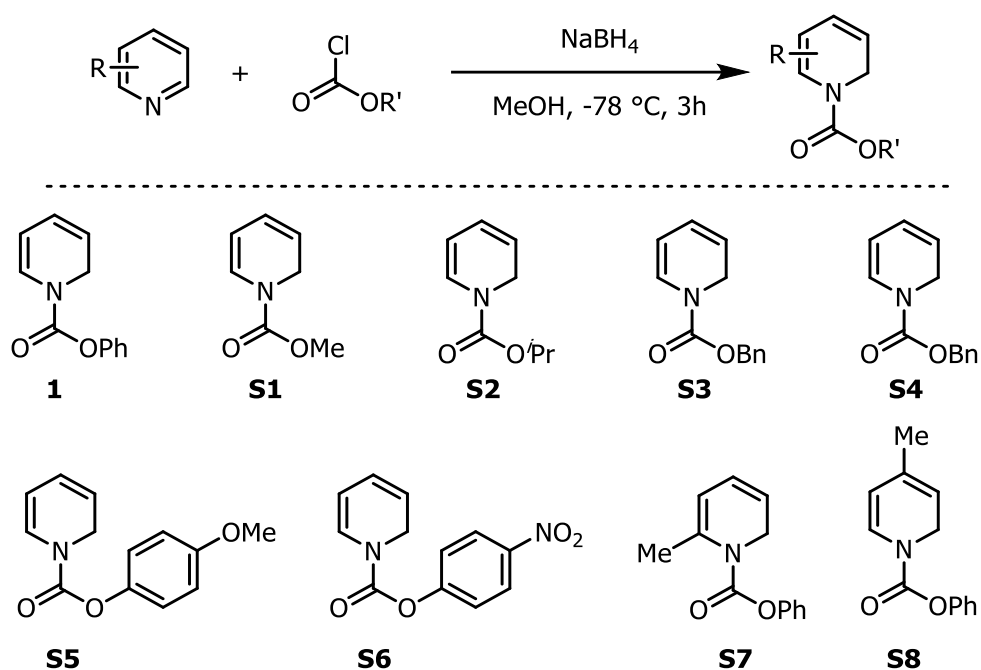

Chloroformate (20 mmol, 1 equiv) was added dropwise under nitrogen to a MeOH solution (50 mL) of  $\text{NaBH}_4$  (20.0 mmol), pyridine (20 mmol) at  $-78\text{ }^\circ\text{C}$ . The reaction was maintained at  $-78\text{ }^\circ\text{C}$  for 3 h and then quenched by water (50 ml). The mixture was extracted with  $\text{Et}_2\text{O}$  (30 ml) two times. The combined organic layer was washed with 1N NaOH (two times) followed by 1N HCl (two times) then dried over sodium sulfate. After filtration, the solvents were removed by evaporation. The crude mixture was purified by a short pad of silica gel with acetone/hexane (2% to 10% gradient) as an eluent. The solvent was removed by evaporation under reduced pressure to obtain **1** as white solid. The product was then recrystallized in methanol providing **1** (72% yield) as white crystal.

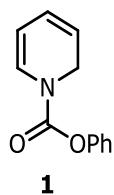

**Phenyl pyridine-1(2H)-carboxylate (1):**  $^1\text{H NMR}$  (400 MHz,  $\text{CDCl}_3$ ) (2 rotamers):  $\delta$  (ppm) 7.42 – 7.33 (m, 2H), 7.25 – 7.19 (m, 1H), 7.18 – 7.10 (m, 2H), 6.92 – 6.76 (m, 1H), 5.95 – 5.86 (m, 1H), 5.65 – 5.53 (m, 1H), 5.33 – 5.17 (m, 1H), 4.67 – 4.38 (m, 2H). The spectroscopic data satisfactorily matched previously reported data.<sup>1,2</sup>

Other 1,2-dihydropyridines S1–S8 were prepared from the corresponding pyridines according to the procedure described above. The spectroscopic data for 1,2-dihydropyridines S1–S8 satisfactorily matched previously reported data.<sup>1,2</sup> 1,2-dihydropyridines (**S1–S8**) were used immediately in order to prevent decomposition.

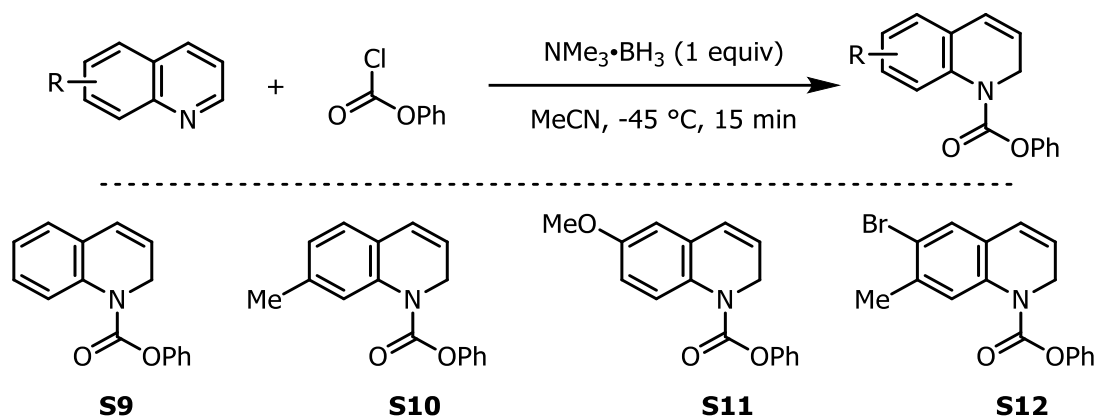

A solution of  $\text{NMe}_3\text{BH}_3$  (5.5 mmol, 1.1 equiv) in MeCN (5 mL) was added dropwise to a flask containing quinoline (5 mmol, 1 equiv) and phenyl chloroformate (6 mmol, 1.2 equiv) in MeCN (5 mL) at  $-40$  °C and stirred for 5 minutes. The reaction was stirred for 10 minutes at room temperature. The product was directly purified by column chromatography on silica gel. The spectroscopic data for Phenyl quinoline-1(2H)-carboxylate (**S9**) satisfactorily matched previously reported data.<sup>3</sup>

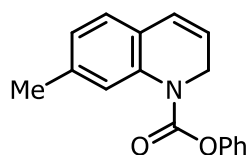

**Phenyl 7-methylquinoline-1(2H)-carboxylate (S10):** The corresponding compound was prepared following the procedure above using phenyl chloroformate and 7-methylquinoline. Purification by flash chromatography (2% acetone/petrol to 25% acetone/petrol) afforded compound **S10** as white solid (82% yield).

**<sup>1</sup>H NMR** ( $\text{CDCl}_3$ , 400 MHz):  $\delta$  (ppm) 7.50 (dd,  $J = 17.4, 4.2$  Hz, 1H), 7.32 (tt,  $J = 7.6, 2.2$  Hz, 3H), 7.21 – 7.03 (m, 5H), 6.94 (d,  $J = 7.6$  Hz, 1H), 6.72 (dq,  $J = 9.7, 1.0$  Hz, 2H), 6.10 (dt,  $J = 9.7, 4.2$  Hz, 1H), 4.43 (dd,  $J = 4.2, 1.4$  Hz, 3H), 2.32 (s, 3H). **<sup>13</sup>C NMR** (101 MHz,  $\text{CDCl}_3$ ):  $\delta$  (ppm) 152.7, 151.2, 136.1, 133.9, 129.4, 127.0, 126.9, 126.7, 125.6, 123.7, 122.0, 121.7, 115.4, 43.2, 19.2. **HRMS** (ESI):  $m/z$  calcd for  $\text{C}_{17}\text{H}_{16}\text{O}_2\text{N}^+$   $[\text{M} + \text{H}]^+$  266.1176 found 266.1194. **IR** ( $\nu_{\text{max}}/\text{cm}^{-1}$ ) 2361, 1731, 1642, 1608, 1495, 1435, 1408, 1379, 1349, 1257, 1237, 1207, 1082, 1059, 900, 773, 754, 713.

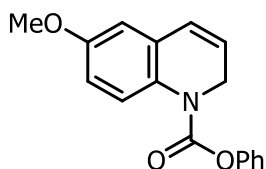

**Phenyl-6-methoxyquinoline-1(2H)-carboxylate (S11):** The corresponding compound was prepared following general procedure **2** using phenyl chloroformate and 6-methoxyquinoline. Purification by flash chromatography (2% acetone/petrol to 25% acetone/petrol) afforded compound **S11** as white solid (76% yield).

**<sup>1</sup>H NMR** (CDCl<sub>3</sub>, 400 MHz) δ (ppm) 7.61 (bs, 1H), 7.43 – 7.34 (m, 2H), 7.26 – 7.14 (m, 3H), 6.80 (dd, *J* = 8.9, 2.9 Hz, 1H), 6.68 (d, *J* = 2.9 Hz, 1H), 6.54 (d, *J* = 9.6 Hz, 1H), 6.11 (dt, *J* = 8.8, 3.9 Hz, 1H), 4.53 (s, 2H), 3.81 (s, 2H). **<sup>13</sup>C NMR** (126 MHz, CDCl<sub>3</sub>) δ (ppm) 156.8, 151.2, 129.5, 129.4, 128.6, 126.6, 125.6, 124.9, 121.7, 120.2, 115.4, 112.9, 111.4, 55.5, 44.0. **IR** (ν<sub>max</sub>/cm<sup>-1</sup>) 2361, 1729, 1593, 1557, 1494, 1463, 1372, 1339, 1281, 1227, 1204, 1163, 1123, 772, 752, 687.

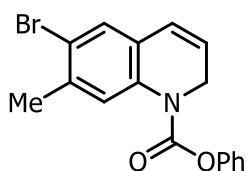

**phenyl 6-bromo-7-methylquinoline-1(2H)-carboxylate (S12):** The corresponding compound was prepared following general procedure **2** using phenyl chloroformate and 6-bromo-7-methylquinoline. Purification by flash chromatography (2% acetone/petrol to 25% acetone/petrol) afforded compound **S12** as viscous liquid (80% yield).

**<sup>1</sup>H NMR** (CDCl<sub>3</sub>, 500 MHz) δ (ppm) 7.64 (bs, 1H), 7.40 (tt, *J* = 7.7, 2.2 Hz, 2H), 7.29 – 7.20 (m, 2H), 7.17 (dt, *J* = 8.9, 1.8 Hz, 2H), 6.47 (d, *J* = 9.6 Hz, 1H), 6.05 (dt, *J* = 9.0, 4.1 Hz, 1H), 4.54 (s, 2H), 2.37 (s, 3H). **<sup>13</sup>C NMR** (126 MHz, CDCl<sub>3</sub>) δ (ppm) 152.6, 151.1, 137.2, 135.1, 129.7, 129.5, 127.7, 125.9, 125.5, 121.8, 120.3, 44.0, 23.2. **HRMS** (ESI): *m/z* calcd for C<sub>17</sub>H<sub>15</sub>O<sub>2</sub>NBr<sup>+</sup> [M + H]<sup>+</sup> 344.0281 found 344.0285. **IR** (ν<sub>max</sub>/cm<sup>-1</sup>) 2361, 1725, 1595, 1494, 1390, 1365, 1332, 1276, 1231, 1204, 1161, 1048, 1030, 885, 771, 749, 689.

### 3. General Procedure for Rh-Catalyzed Cross-Coupling

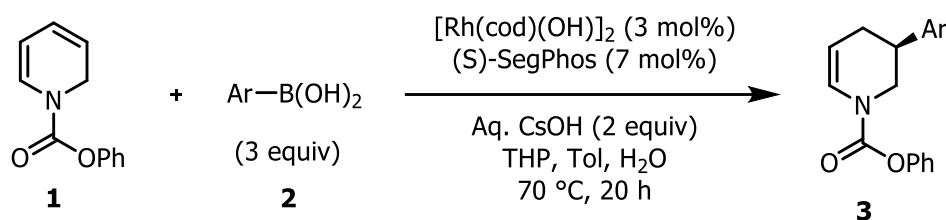

**General Procedure A:**  $[\text{Rh}(\text{cod})\text{OH}]_2$  (6.9 mg, 0.015 mmol, 3 mol%) and (S)-Segphos (21.4 mg, 0.035 mmol, 7 mol%) were added to a 7 mL dram vial equipped with a magnetic stir bar and sealed with a rubber septum. The vial was put under reduced pressure then purged with argon, this was repeated three times. Toluene (0.25 mL), THP (0.25 mL),  $\text{H}_2\text{O}$  (0.25 mL) followed by aq. CsOH (50 wt%, 180  $\mu\text{L}$ , 1 mmol, 2.0 equiv) was added to the vial and the catalyst solution was stirred at 70 °C. After 10 min, boronic acid **2** (1.5 mmol, 3.0 equiv) then dihydropyridine **1** (0.5 mmol, 1 equiv) was added and the resulting mixture was stirred at 70 °C for 20 hours unless stated otherwise. Upon completion of reaction, the mixture was cooled to room temperature and diluted with  $\text{Et}_2\text{O}$  (5 mL) before passing through a plug of  $\text{SiO}_2$ . The plug was washed with additional 20 mL of  $\text{Et}_2\text{O}$  and the solvents were removed in vacuo. Purification by flash chromatography afforded the desired product **3**.

**Racemates:** Racemic samples were synthesized with ( $\pm$ )-SegPhos instead of (S)-Segphos.

**Upscale:** Larger-scale experiments were performed in 5 mmol scale in direct analogy to the general procedure B in a 25 mL round-bottom flask.

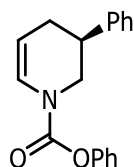

**Phenyl-(S)-3-phenyl-3,4-dihydropyridine-1(2H)-carboxylate (3a):** The corresponding compound was prepared following general procedure **A** using phenyl boronic acid and phenyl pyridine-1(2H)-carboxylate. The mixture was stirred at 70 °C for 20 hours. Purification by flash chromatography (2% acetone/petrol to 10% acetone/petrol) afforded compound **3a** as viscous liquid (80% yield, 96% ee).

**<sup>1</sup>H NMR** (400 MHz, CDCl<sub>3</sub>) (2 rotamers): δ (ppm) 7.44 – 7.33 (m, 4H), 7.32 – 7.01 (m, 7H), 5.25 – 5.14 (m, 1H), 4.35 – 4.29 (m, 1H), 3.55 – 3.29 (m, 1H), 3.11 – 3.07 (m, 1H), 2.45 – 2.26 (m, 2H). **<sup>13</sup>C NMR** (101 MHz, CDCl<sub>3</sub>) (2 rotamers): δ (ppm) 152.1, 151.8, 151.3, 151.1, 142.8, 142.7, 129.5, 129.4, 128.9, 128.85, 127.4, 127.3, 127.2, 127.1, 125.7, 125.7, 125.3, 125.0, 121.8, 121.7, 107.9, 107.5, 48.6, 48.0, 38.8, 38.6, 29.5, 29.3.

**HRMS** (ESI): m/z calcd for C<sub>18</sub>H<sub>18</sub>O<sub>2</sub>N<sup>+</sup> [M + H]<sup>+</sup> 280.1332 found 280.1328.

**IR** (ν<sub>max</sub>/cm<sup>-1</sup>) 1723, 1406, 1362, 1252, 1200, 751, 700, 689.

**SFC Conditions:** Chiralpak IC; Gradient 1; 99:1 er (major enantiomer t<sub>R</sub> = 4.08 min; minor enantiomer t<sub>R</sub> = 4.28 min), **98% ee**. [α]<sub>D</sub><sup>25</sup> = -41.8 (c = 2.0, CHCl<sub>3</sub>).

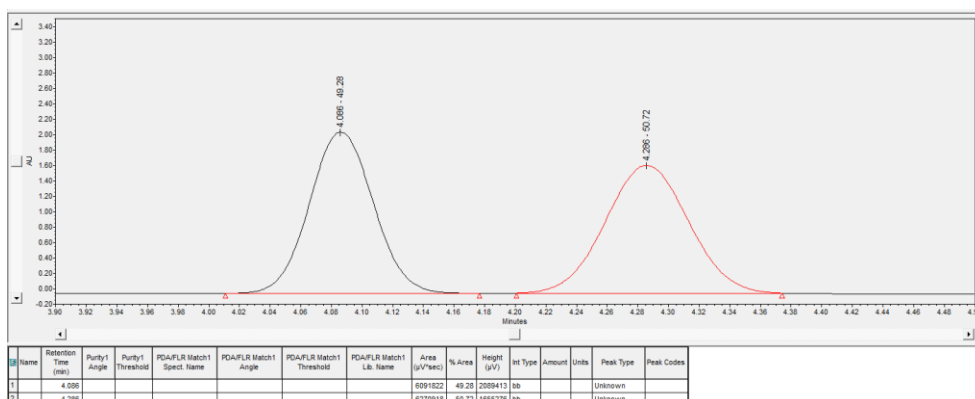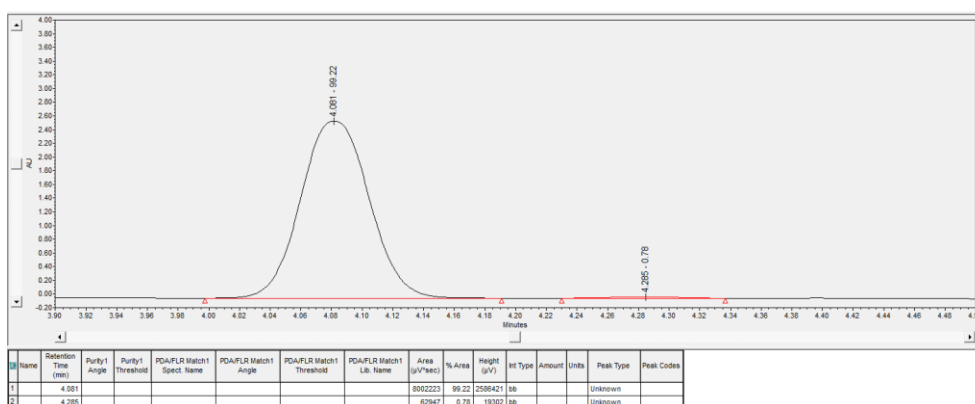

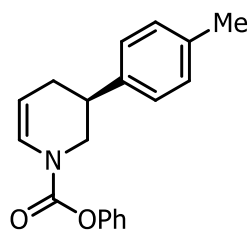

**Phenyl-(S)-3-(p-tolyl)-3,4-dihydropyridine-1(2H)-carboxylate (3b):** The corresponding compound was prepared following general procedure **A** using *p*-tolyl boronic acid and phenyl pyridine-1(2H)-carboxylate. The mixture was stirred at 70 °C for 20 hours. Purification by flash chromatography (2% acetone/petrol to 10% acetone/petrol) afforded compound **3b** as white solid (80% yield, 99% ee).

**<sup>1</sup>H NMR** (400 MHz, CDCl<sub>3</sub>) (2 rotamers): δ (ppm) 7.38 (tdd, *J* = 9.3, 6.3, 1.8 Hz, 2H), 7.26 – 7.00 (m, 8H), 5.27 – 5.10 (m, 1H), 4.36 – 4.25 (m, 1H), 3.53 – 3.23 (m, 1H), 3.18 – 3.00 (m, 1H), 2.44 – 2.27 (m, 5H). **<sup>13</sup>C NMR** (101 MHz, CDCl<sub>3</sub>) (2 rotamers): δ (ppm) 152.1, 151.8, 151.3, 151.1, 139.8, 139.7, 136.8, 136.7, 129.6, 129.5, 129.48, 129.4, 127.2, 127.18, 125.7, 125.6, 125.2, 124.9, 121.8, 121.7, 107.9, 107.5, 48.7, 48.1, 38.3, 38.2, 29.5, 29.4, 21.1.

**HRMS** (ESI): *m/z* calcd for C<sub>19</sub>H<sub>20</sub>O<sub>2</sub>N<sup>+</sup> [M + H]<sup>+</sup> 294.1489 found 294.1491.

**IR** (ν<sub>max</sub>/cm<sup>-1</sup>) 1724, 1405, 1359, 1251, 1199, 1163, 1074, 974, 813, 751, 728, 689.

**SFC Conditions:** Chiralpak IE; Gradient 1; 99.5:0.5 er (major enantiomer *t<sub>R</sub>* = 4.31 min; minor enantiomer *t<sub>R</sub>* = 4.19 min), **99% ee**. [α]<sub>D</sub><sup>25</sup> = -54.5 (c = 2.0, CHCl<sub>3</sub>).

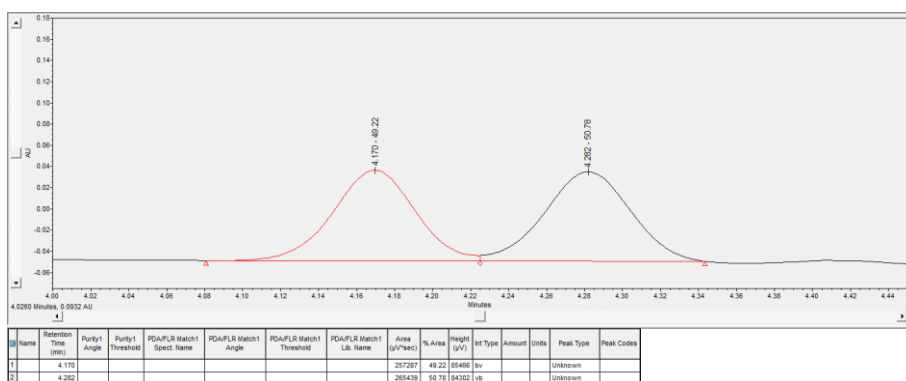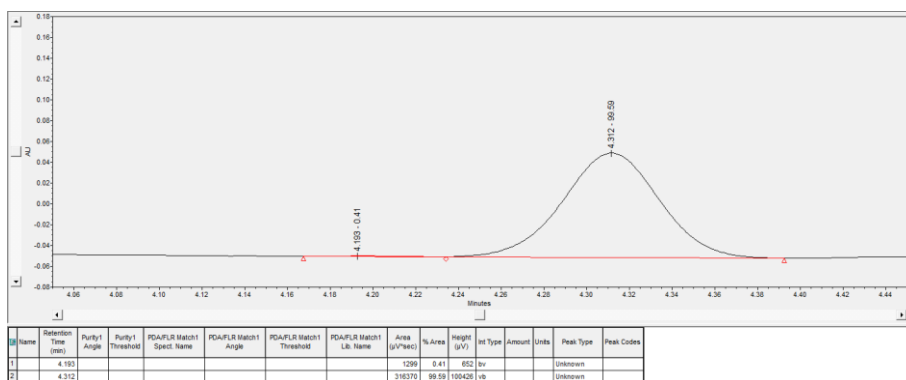



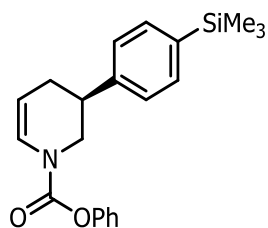

### Phenyl-(S)-3-(4-(trimethylsilyl)phenyl)-3,4-dihydropyridine-1(2H)-carboxylate

**(3c):** The corresponding compound was prepared following general procedure **A** using 4-(trimethylsilyl)phenyl boronic acid and phenyl pyridine-1(2H)-carboxylate. The mixture was stirred at 70 °C for 20 hours. Purification by flash chromatography (100% petrol to 5% acetone/petrol) afforded compound **3c** as viscous liquid (80% yield, 90% ee).

**<sup>1</sup>H NMR** (500 MHz, CDCl<sub>3</sub>) (2 rotamers): δ (ppm) 7.55 – 7.49 (m, 2H), 7.35 (dt, *J* = 14.3, 8.0 Hz, 2H), 7.29 – 6.97 (m, 6H), 5.23 – 5.12 (m, 1H), 4.31 (dt, *J* = 11.7, 4.8 Hz, 1H), 3.51 – 3.31 (m, 1H), 3.16 – 3.00 (m, 1H), 2.43 – 2.26 (m, 2H), 0.27 (s, 9H). **<sup>13</sup>C NMR** (126 MHz, CDCl<sub>3</sub>) (2 rotamers): δ (ppm) 152.1, 151.8, 151.2, 151.1, 143.4, 143.2, 139.2, 139.1, 133.9, 133.89, 129.5, 129.4, 126.8, 126.78, 125.7, 125.6, 125.3, 124.9, 121.8, 121.7, 107.9, 107.5, 48.5, 47.9, 38.7, 38.6, 29.4, 29.2, -1.0.

**HRMS** (ESI): *m/z* calcd for C<sub>21</sub>H<sub>26</sub>O<sub>2</sub>NSi<sup>+</sup> [M + H]<sup>+</sup> 352.1727 found 352.1721.

**IR** (ν<sub>max</sub>/cm<sup>-1</sup>) 1727, 1656, 1495, 1406, 1360, 1249, 1202, 1163, 840, 816, 752, 724, 689.

**SFC Conditions:** Chiralpak IB; Gradient 1; 95:5 er (major enantiomer *t<sub>R</sub>* = 2.98 min; minor enantiomer *t<sub>R</sub>* = 2.86 min), **90% ee**. [α]<sub>D</sub><sup>25</sup> = -65.5 (c = 2.0, CHCl<sub>3</sub>).

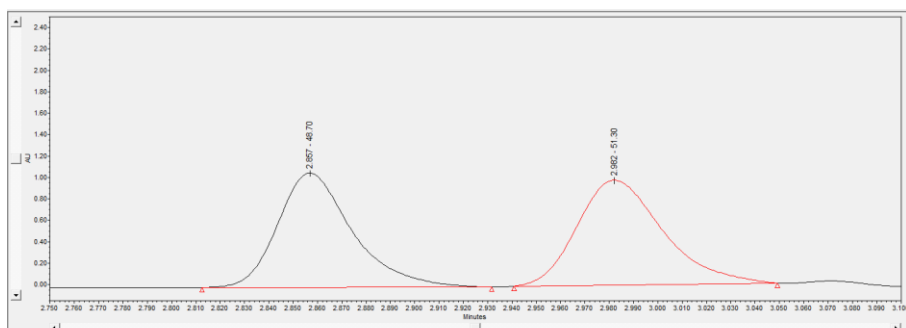

| Name | Retention Time (min) | Purity1 Angle | Purity1 Threshold | PDALFLR Match1 Spect. Name | PDALFLR Match1 Angle | PDALFLR Match1 Threshold | PDALFLR Match1 Lib. Name | Area (μV*sec) | %Area | Height (μV) | Int Type | Amount | Units | Peak Type | Peak Codes |
|------|----------------------|---------------|-------------------|----------------------------|----------------------|--------------------------|--------------------------|---------------|-------|-------------|----------|--------|-------|-----------|------------|
| 1    | 2.867                |               |                   |                            |                      |                          |                          | 2272025       | 48.70 | 1066600     | bb       |        |       | Unknown   |            |
| 2    | 2.962                |               |                   |                            |                      |                          |                          | 2362993       | 51.30 | 876027      | bb       |        |       | Unknown   |            |

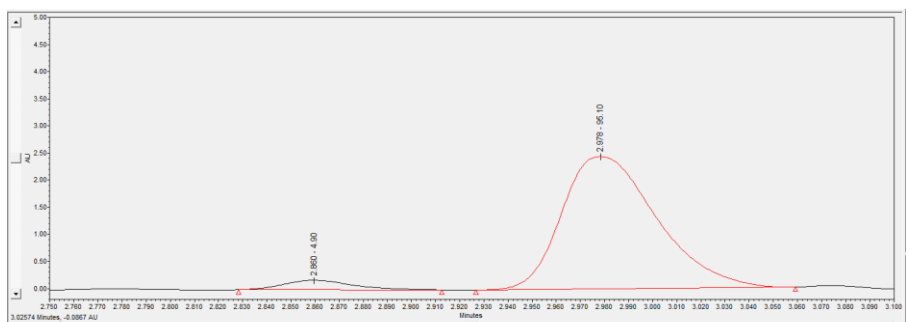

| Name | Retention Time (min) | Purity1 Angle | Purity1 Threshold | PDALFLR Match1 Spect. Name | PDALFLR Match1 Angle | PDALFLR Match1 Threshold | PDALFLR Match1 Lib. Name | Area (μV*sec) | %Area | Height (μV) | Int Type | Amount | Units | Peak Type | Peak Codes |
|------|----------------------|---------------|-------------------|----------------------------|----------------------|--------------------------|--------------------------|---------------|-------|-------------|----------|--------|-------|-----------|------------|
| 1    | 2.860                |               |                   |                            |                      |                          |                          | 343711        | 4.90  | 174233      | bb       |        |       | Unknown   |            |
| 2    | 2.978                |               |                   |                            |                      |                          |                          | 6662119       | 95.10 | 2441225     | bb       |        |       | Unknown   |            |

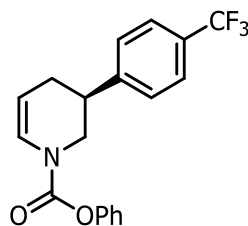

**Phenyl-(S)-3-(4-(trifluoromethyl)phenyl)-3,4-dihydropyridine-1(2H)-carboxylate (3d):** The corresponding compound was prepared following general procedure **A** using 4-(trifluoromethyl)phenyl boronic acid and phenyl pyridine-1(2H)-carboxylate. The mixture was stirred at 70 °C for 20 hours. Purification by flash chromatography (2% acetone/petrol to 15% acetone/petrol) afforded compound **3d** as viscous liquid (73% yield, 98% ee).

**<sup>1</sup>H NMR** (400 MHz, CDCl<sub>3</sub>) (2 rotamers): δ (ppm) 7.59 (dt, *J* = 8.8, 4.7 Hz, 2H), 7.44 – 7.29 (m, 4H), 7.23 – 6.99 (m, 4H), 5.25 – 5.11 (m, 1H), 4.27 (ddt, *J* = 12.5, 5.1, 2.5 Hz, 1H), 3.56 – 3.33 (m, 1H), 3.17 (dddd, *J* = 20.2, 10.0, 7.6, 3.8 Hz, 1H), 2.46 – 2.26 (m, 2H). **<sup>13</sup>C NMR** (101 MHz, CDCl<sub>3</sub>) (2 rotamers): δ (ppm) 152.0, 151.8, 151.2, 151.0, 146.9, 146.7, 129.5, 129.48, 127.8, 127.7, 125.8, 125.8, 125.6, 125.2, 121.8, 121.6, 107.4, 107.0, 48.2, 47.5, 38.6, 38.5, 29.2, 29.1. **<sup>19</sup>F NMR** (376 MHz, CDCl<sub>3</sub>) (2 rotamers) δ (ppm) –62.4, –62.5.

**HRMS** (ESI): *m/z* calcd for C<sub>19</sub>H<sub>17</sub>F<sub>3</sub>O<sub>2</sub>N<sup>+</sup> [M + H]<sup>+</sup> 348.1206 found 348.1206.

**IR** (ν<sub>max</sub>/cm<sup>-1</sup>) 1725, 1408, 1327, 1202, 1164, 1122, 1068, 1018, 834, 755.

**HPLC Conditions:** Chiralpak IE; Isocratic 1% IPA/Hexane 1ml/min; 99:1 er (major enantiomer *t<sub>R</sub>* = 19.5 min; minor enantiomer *t<sub>R</sub>* = 22.1 min), **98% ee**. [α]<sub>D</sub><sup>25</sup> = –33.7 (*c* = 2.0, CHCl<sub>3</sub>).

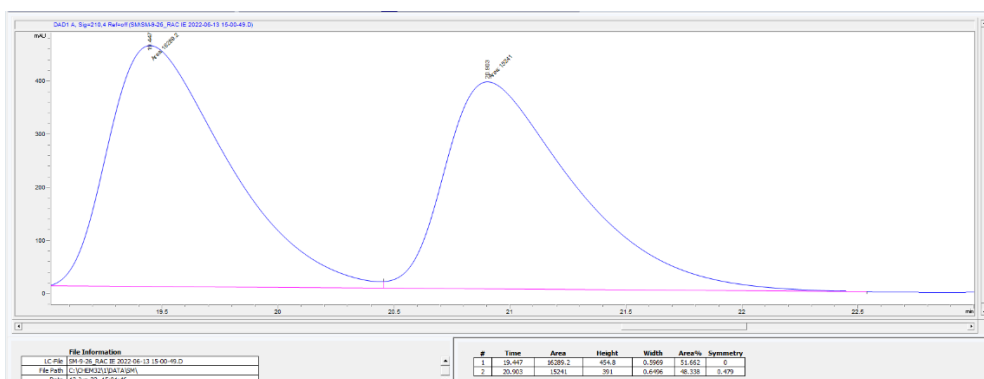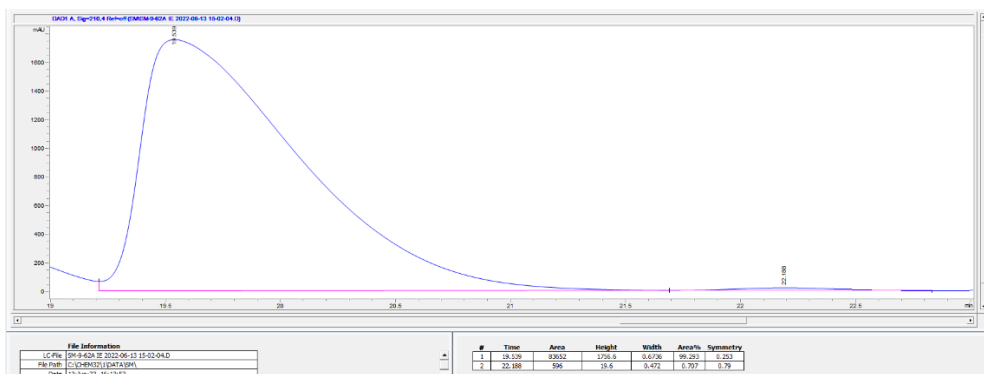

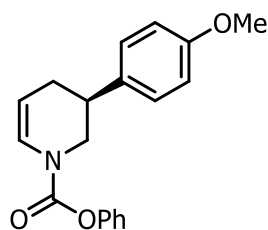

### Phenyl-(S)-3-(4-methoxyphenyl)-3,4-dihydropyridine-1(2H)-carboxylate (**3e**):

The corresponding compound was prepared following general procedure **A** using 4-methoxyphenyl boronic acid and phenyl pyridine-1(2H)-carboxylate. The mixture was stirred at 70 °C for 20 hours. Purification by flash chromatography (2% acetone/petrol to 20% acetone/petrol) afforded compound **3e** as viscous liquid (52% yield, 98% ee).

**<sup>1</sup>H NMR** (400 MHz, CDCl<sub>3</sub>) (2 rotamers): δ (ppm) 7.37 (td, *J* = 8.7, 7.2 Hz, 2H), 7.26 – 6.99 (m, 6H), 6.92 – 6.87 (m, 2H), 5.25 – 5.11 (m, 1H), 4.27 (ddd, *J* = 13.7, 6.8, 2.8 Hz, 1H), 3.81 (d, *J* = 1.1 Hz, 4H), 3.49 – 3.25 (m, 1H), 3.12 – 3.01 (m, 1H), 2.43 – 2.24 (m, 2H). **<sup>13</sup>C NMR** (101 MHz, CDCl<sub>3</sub>) (2 rotamers): δ (ppm) 158.7, 158.68, 152.1, 151.8, 151.3, 151.1, 134.9, 134.8, 129.5, 129.4, 128.3, 128.2, 125.7, 125.65, 125.3, 124.9, 121.8, 121.7, 114.3, 114.2, 107.9, 107.5, 55.4, 55.41, 48.8, 48.2, 37.9, 37.8, 29.6, 29.5.

**HRMS** (ESI): *m/z* calcd for C<sub>19</sub>H<sub>20</sub>O<sub>3</sub>N<sup>+</sup> [*M* + *H*]<sup>+</sup> 310.1438 found 310.1457.

**IR** (ν<sub>max</sub>/cm<sup>-1</sup>) 1723, 1514, 1406, 1360, 1250, 1200, 1074, 1036, 828, 751, 722, 689.

**SFC Conditions:** Chiralpak IC; Gradient 1; 99:1 er (major enantiomer *t<sub>R</sub>* = 4.92 min; minor enantiomer *t<sub>R</sub>* = 5.08 min), **98% ee**. [*α*]<sub>D</sub><sup>25</sup> = -45.9 (*c* = 2.0, CHCl<sub>3</sub>).

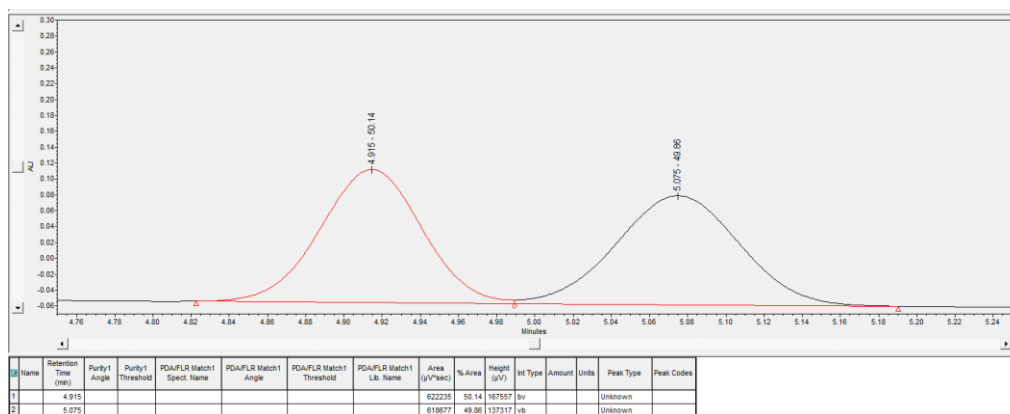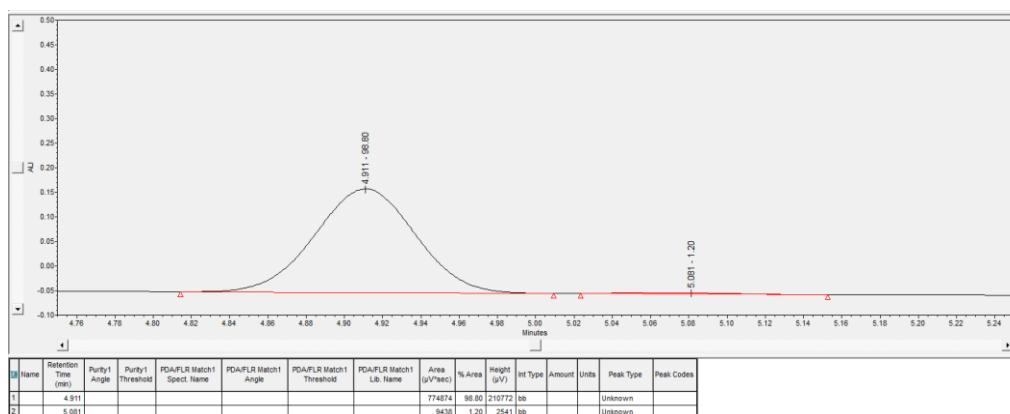

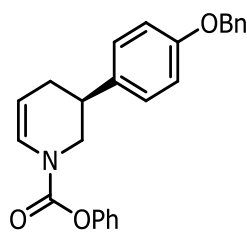

**Phenyl-(S)-3-(4-(benzyloxy)phenyl)-3,4-dihydropyridine-1(2H)-carboxylate (3f):**

The corresponding compound was prepared following general procedure **A** using 4-(benzyloxy)phenyl boronic acid and phenyl pyridine-1(2H)-carboxylate. The mixture was stirred at 70 °C for 20 hours. Purification by flash chromatography (2% acetone/petrol to 20% acetone/petrol) afforded compound **3f** as white solid (47% yield, 99% ee).

**<sup>1</sup>H NMR** (400 MHz, CDCl<sub>3</sub>) (2 rotamers): δ (ppm) 7.48 – 7.29 (m, 7H), 7.27 – 6.91 (m, 8H), 5.25 – 5.10 (m, 1H), 5.07 (s, 3H), 4.41 – 4.24 (m, 1H), 3.46 – 3.24 (m, 1H), 3.12 – 2.96 (m, 1H), 2.43 – 2.24 (m, 2H). **<sup>13</sup>C NMR** (101 MHz, CDCl<sub>3</sub>) (2 rotamers): δ (ppm) 157.9, 152.1, 151.8, 151.3, 151.1, 137.2, 135.2, 135.1, 129.5, 129.4, 128.7, 128.3, 128.27, 128.1, 127.6, 127.56, 125.7, 125.6, 125.3, 124.9, 121.8, 121.7, 115.25, 115.19, 107.9, 107.5, 70.2, 48.8, 48.2, 37.9, 37.8, 29.6, 29.4.

**HRMS** (ESI): m/z calcd for C<sub>25</sub>H<sub>24</sub>O<sub>3</sub>N<sup>+</sup> [M + H]<sup>+</sup> 386.1751 found 386.1761.

**IR** (ν<sub>max</sub>/cm<sup>-1</sup>) 1721, 1512, 1361, 1250, 1200, 1075, 1024, 827, 749, 691, 690.

**SFC Conditions:** Chiralpak IE; Gradient 1; 99.5:0.5 er (major enantiomer t<sub>R</sub> = 6.97 min; minor enantiomer t<sub>R</sub> = 6.78 min), **99% ee**. [α]<sub>D</sub><sup>25</sup> = –59.1 (c = 2.0, CHCl<sub>3</sub>).

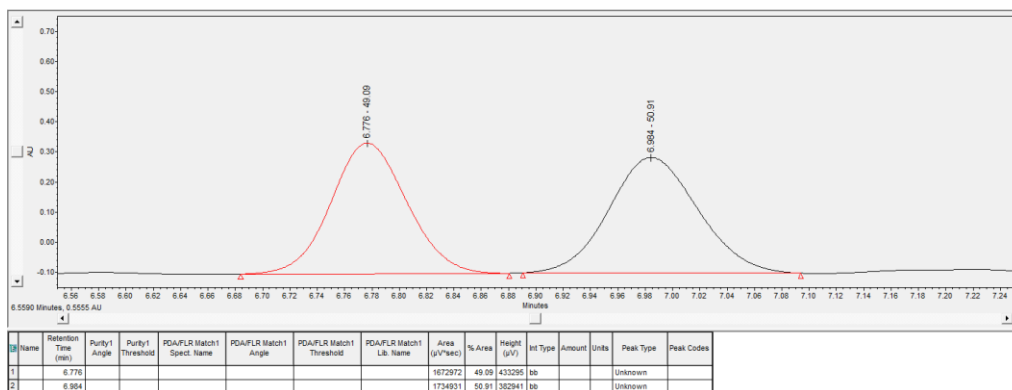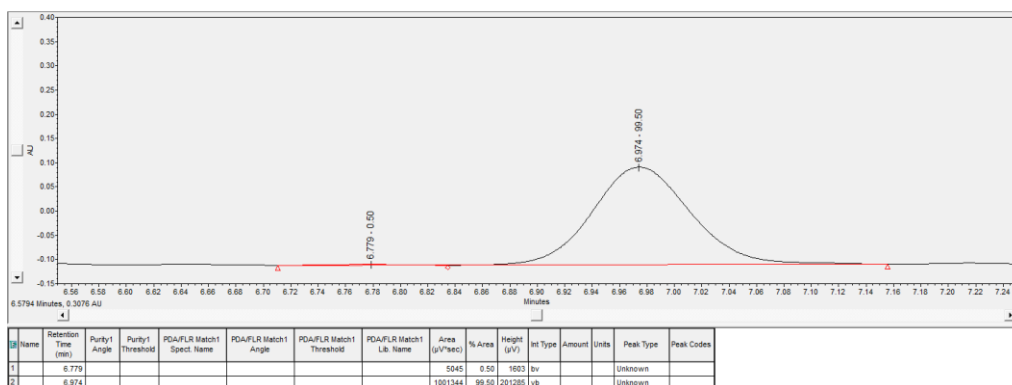

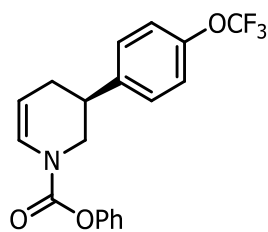

**Phenyl-(S)-3-(4-(trifluoromethoxy)phenyl)-3,4-dihydropyridine-1(2H)-**

**carboxylate (3g):** The corresponding compound was prepared following general procedure **A** using 4-(trifluoromethoxy)phenyl boronic acid and phenyl pyridine-1(2H)-carboxylate. The mixture was stirred at 70 °C for 20 hours. Purification by flash chromatography (2% acetone/petrol to 20% acetone/petrol) afforded compound **3g** as viscous liquid (50% yield, 99% ee).

**<sup>1</sup>H NMR** (500 MHz, CDCl<sub>3</sub>) (2 rotamers): δ (ppm) 7.40 – 7.00 (m, 10H), 5.25 – 5.09 (m, 1H), 4.27 (t, *J* = 10.7 Hz, 1H), 3.56 – 3.28 (m, 1H), 3.13 (ddd, *J* = 15.6, 10.6, 6.0 Hz, 1H), 2.46 – 2.27 (m, 2H). **<sup>13</sup>C NMR** (126 MHz, CDCl<sub>3</sub>) (2 rotamers): δ (ppm) 152.1, 151.8, 151.2, 151.0, 148.3, 141.6, 141.4, 129.54, 129.5, 128.71, 128.7, 125.8, 125.5, 125.1, 121.8, 121.7, 121.5, 121.4, 107.5, 107.1, 48.4, 47.8, 38.1, 38.0, 29.4, 29.3. **<sup>19</sup>F NMR** (376 MHz, CDCl<sub>3</sub>) (2 rotamers): δ (ppm) –57.88, –57.90.

**HRMS** (ESI): *m/z* calcd for C<sub>19</sub>H<sub>17</sub>O<sub>3</sub>NF<sub>3</sub><sup>+</sup> [M + H]<sup>+</sup> 364.1155 found 364.1162.

**IR** (ν<sub>max</sub>/cm<sup>-1</sup>) 1724, 1656, 1510, 1407, 1361, 1263, 1198, 1163, 1075, 846, 750, 689.

**SFC Conditions:** Chiralpak IA; Gradient 3; 93:7 er (major enantiomer *t<sub>R</sub>* = 5.35 min; minor enantiomer *t<sub>R</sub>* = 5.19 min), **86% ee**. [*α*]<sub>D</sub><sup>25</sup> = –39.7 (*c* = 2.0, CHCl<sub>3</sub>).

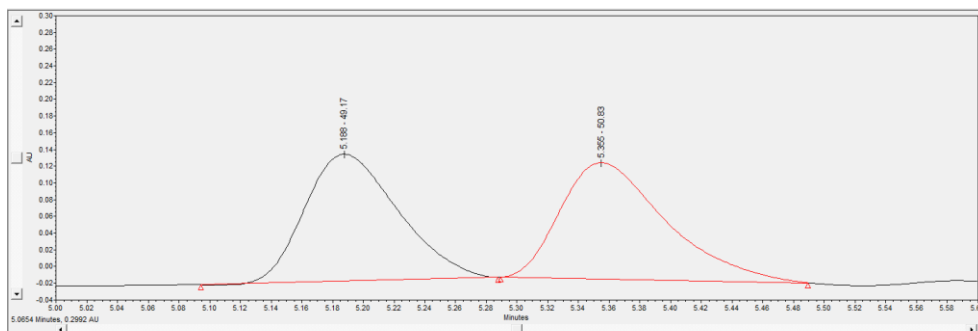

| 3 | Retention Time (min) | Purity1 Angle | Purity1 Threshold | PDIAFLR Match1 Spect. Name | PDIAFLR Match1 Angle | PDIAFLR Match1 Threshold | PDIAFLR Match1 Lib. Name | Area (μV*sec) | % Area | Height (μV) | Int Type | Amount | Units | Peak Type | Peak Codes |
|---|----------------------|---------------|-------------------|----------------------------|----------------------|--------------------------|--------------------------|---------------|--------|-------------|----------|--------|-------|-----------|------------|
| 1 | 5.188                |               |                   |                            |                      |                          |                          | 640994        | 49.17  | 152008      | bb       |        |       | Unknown   |            |
| 2 | 5.355                |               |                   |                            |                      |                          |                          | 862750        | 50.83  | 139113      | bb       |        |       | Unknown   |            |

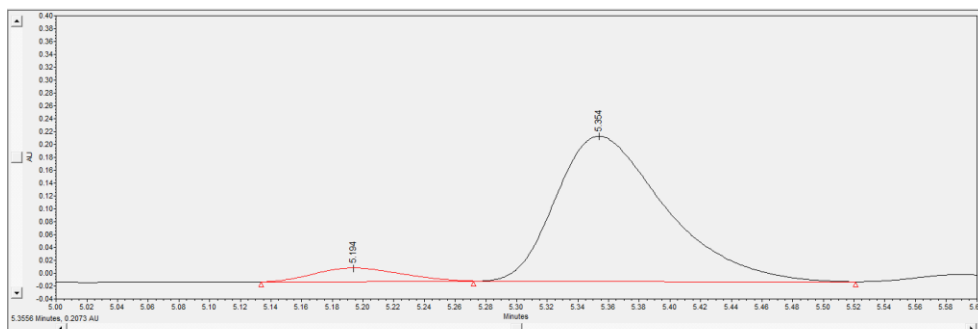

| 3 | Retention Time (min) | Purity1 Angle | Purity1 Threshold | PDIAFLR Match1 Spect. Name | PDIAFLR Match1 Angle | PDIAFLR Match1 Threshold | PDIAFLR Match1 Lib. Name | Area (μV*sec) | % Area | Height (μV) | Int Type | Amount | Units | Peak Type | Peak Codes |
|---|----------------------|---------------|-------------------|----------------------------|----------------------|--------------------------|--------------------------|---------------|--------|-------------|----------|--------|-------|-----------|------------|
| 1 | 5.194                |               |                   |                            |                      |                          |                          | 82293         | 6.06   | 21115       | bb       |        |       | Unknown   |            |
| 2 | 5.354                |               |                   |                            |                      |                          |                          | 118871        | 93.14  | 254466      | bb       |        |       | Unknown   |            |

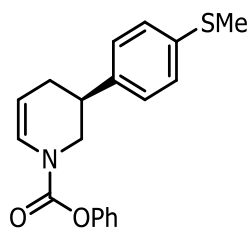

### Phenyl-(S)-3-(4-(methylthio)phenyl)-3,4-dihydropyridine-1(2H)-carboxylate

**(3h):** The corresponding compound was prepared following general procedure **A** using 4-(methylthio)phenyl boronic acid and phenyl pyridine-1(2H)-carboxylate. The mixture was stirred at 70 °C for 20 hours. Purification by flash chromatography (2% acetone/petrol to 15% acetone/petrol) afforded compound **3h** as viscous liquid (70% yield, 86% ee).

**<sup>1</sup>H NMR** (400 MHz, CDCl<sub>3</sub>) (2 rotamers): δ (ppm) 7.34 (dtd, *J* = 8.7, 7.2, 1.9 Hz, 2H), 7.25 – 6.90 (m, 8H), 5.24 – 5.04 (m, 1H), 4.32 – 4.14 (m, 1H), 3.51 – 3.17 (m, 1H), 3.13 – 2.93 (m, 1H), 2.46 (s, 3H), 2.37 – 2.22 (m, 2H). **<sup>13</sup>C NMR** (101 MHz, CDCl<sub>3</sub>) (2 rotamers): δ (ppm) 152.1, 151.8, 151.2, 151.1, 139.7, 139.6, 137.1, 137.0, 129.5, 129.4, 127.83, 127.80, 127.3, 127.2, 125.7, 125.68, 125.3, 124.9, 121.8, 121.7, 107.7, 107.4, 48.5, 47.9, 38.2, 38.0, 29.4, 29.2, 16.2, 16.1.

**HRMS** (ESI): *m/z* calcd for C<sub>19</sub>H<sub>20</sub>O<sub>2</sub>SN<sup>+</sup> [M + H]<sup>+</sup> 326.1209 found 326.1198.

**IR** (ν<sub>max</sub>/cm<sup>-1</sup>) 1721, 1495, 1406, 1353, 1266, 1200, 1163, 1095, 1074, 973, 817, 748, 690.

**SFC Conditions:** Chiralpak IB; Gradient 1; 93:7 er (major enantiomer *t<sub>R</sub>* = 4.93 min; minor enantiomer *t<sub>R</sub>* = 4.52 min), **86% ee**. [α]<sub>D</sub><sup>25</sup> = -77.3 (c = 2.0, CHCl<sub>3</sub>).

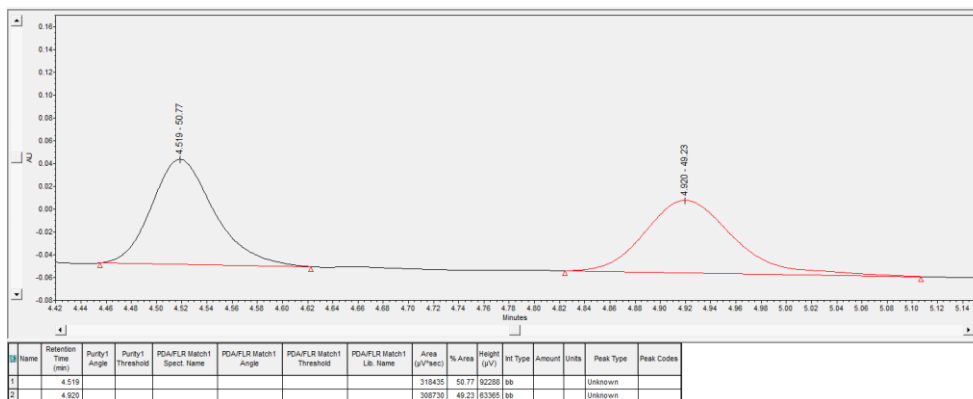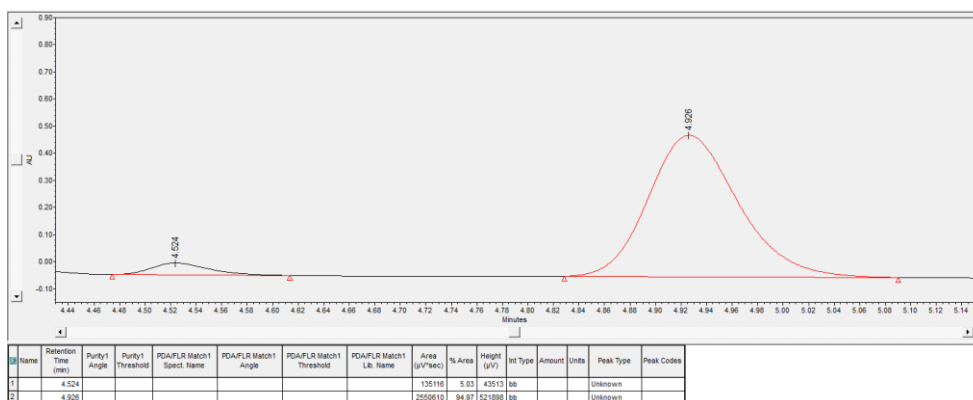

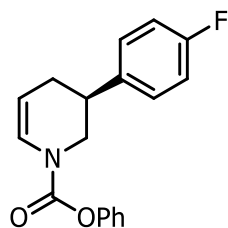

**Phenyl-(S)-3-(4-fluorophenyl)-3,4-dihydropyridine-1(2H)-carboxylate (3i):** The corresponding compound was prepared following general procedure **A** using 4-fluorophenyl boronic acid and phenyl pyridine-1(2H)-carboxylate. The mixture was stirred at 70 °C for 20 hours. Purification by flash chromatography (2% acetone/petrol to 12% acetone/petrol) afforded compound **3i** as viscous liquid (75% yield, 94% ee).

**<sup>1</sup>H NMR** (500 MHz, CDCl<sub>3</sub>) (2 rotamers): δ (ppm) 7.37 (dt, J = 10.8, 8.0 Hz, 2H), 7.25 – 6.98 (m, 8H), 5.25 – 5.09 (m, 1H), 4.26 (ddt, J = 16.4, 12.4, 2.3 Hz, 1H), 3.51 – 3.25 (m, 1H), 3.10 (dtt, J = 15.8, 10.5, 4.5 Hz, 1H), 2.43 – 2.25 (m, 2H). **<sup>13</sup>C NMR** (126 MHz, CDCl<sub>3</sub>) (<sup>19</sup>F decoupled) (2 rotamers): δ (ppm) 163.1, 160.7, 152.1, 151.8, 151.2, 151.0, 138.5, 138.4, 129.5, 129.46, 128.8, 128.78, 128.74, 128.70, 125.7, 125.4, 125.0, 121.8, 121.7, 115.8, 115.76, 115.6, 115.5, 107.6, 107.3, 48.6, 48.0, 38.0, 37.9, 29.5, 29.4. **<sup>19</sup>F NMR** (471 MHz, CDCl<sub>3</sub>) (2 rotamers): δ (ppm) –115.8, –115.9.

**HRMS** (ESI): m/z calcd for C<sub>18</sub>H<sub>17</sub>O<sub>2</sub>FN<sup>+</sup> [M + H]<sup>+</sup> 298.1238 found 298.1244.

**IR** (ν<sub>max</sub>/cm<sup>-1</sup>) 1724, 1511, 1406, 1361, 1200, 1162, 1074, 832, 753, 730, 689.

**SFC Conditions:** Chiralpak ID; Gradient 1; 97:3 er (major enantiomer t<sub>R</sub> = 3.04 min; minor enantiomer t<sub>R</sub> = 2.97 min), **94% ee**. [α]<sub>D</sub><sup>25</sup> = –39.3 (c = 2.0, CHCl<sub>3</sub>).

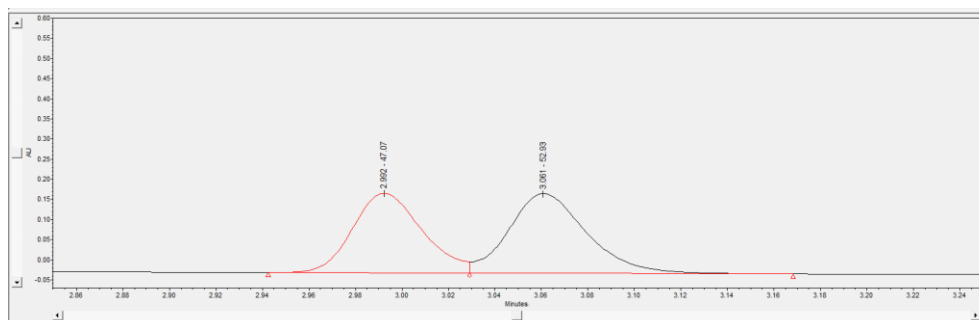

| Name | Retention Time (min) | Purity1 Angle | Purity1 Threshold | PDA/FLR Match1 Spect Name | PDA/FLR Match1 Angle | PDA/FLR Match1 Threshold | PDA/FLR Match1 Lib. Name | Area (μV*sec) | %Area | Height (μV) | Int Type | Amount | Units | Peak Type | Peak Codes |
|------|----------------------|---------------|-------------------|---------------------------|----------------------|--------------------------|--------------------------|---------------|-------|-------------|----------|--------|-------|-----------|------------|
| 1    | 2.992                |               |                   |                           |                      |                          |                          | 488589        | 47.07 | 197622      | uv       |        |       | Unknown   |            |
| 2    | 3.001                |               |                   |                           |                      |                          |                          | 494491        | 52.83 | 197688      | uv       |        |       | Unknown   |            |

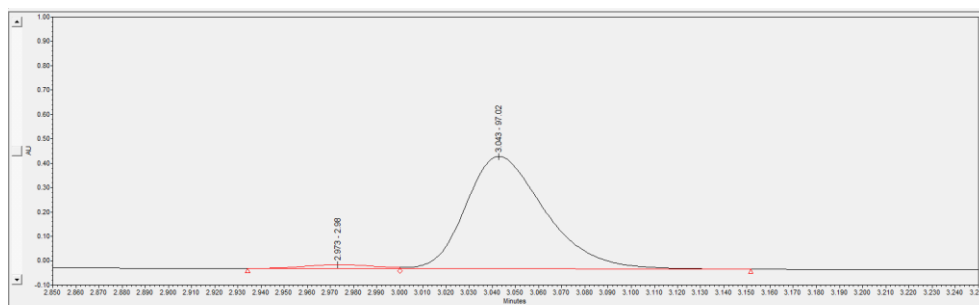

| Name | Retention Time (min) | Purity1 Angle | Purity1 Threshold | PDA/FLR Match1 Spect Name | PDA/FLR Match1 Angle | PDA/FLR Match1 Threshold | PDA/FLR Match1 Lib. Name | Area (μV*sec) | %Area | Height (μV) | Int Type | Amount | Units | Peak Type | Peak Codes |
|------|----------------------|---------------|-------------------|---------------------------|----------------------|--------------------------|--------------------------|---------------|-------|-------------|----------|--------|-------|-----------|------------|
| 1    | 2.973                |               |                   |                           |                      |                          |                          | 32733         | 2.86  | 16252       | uv       |        |       | Unknown   |            |
| 2    | 3.043                |               |                   |                           |                      |                          |                          | 1086581       | 97.02 | 481350      | uv       |        |       | Unknown   |            |

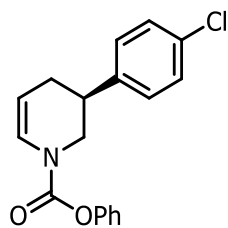

**Phenyl-(S)-3-(4-chlorophenyl)-3,4-dihydropyridine-1(2H)-carboxylate (3j):** The corresponding compound was prepared following general procedure **A** using 4-chlorophenyl boronic acid and phenyl pyridine-1(2H)-carboxylate. The mixture was stirred at 70 °C for 20 hours. Purification by flash chromatography (2% acetone/petrol to 20% acetone/petrol) afforded compound **3j** as viscous liquid (63% yield, 98% ee).

**<sup>1</sup>H NMR** (400 MHz, CDCl<sub>3</sub>) (2 rotamers): δ (ppm) 7.42 – 7.28 (m, 4H), 7.26 – 6.99 (m, 6H), 5.26 – 5.10 (m, 1H), 4.32 – 4.20 (m, 1H), 3.52 – 3.24 (m, 1H), 3.09 (qdd, *J* = 10.3, 7.6, 3.7 Hz, 1H), 2.44 – 2.23 (m, 2H). **<sup>13</sup>C NMR** (101 MHz, CDCl<sub>3</sub>) (2 rotamers): δ (ppm) 151.8, 151.2, 151.0, 141.3, 141.2, 132.9, 129.5, 129.48, 129.04, 129.0, 128.7, 128.67, 125.8, 125.5, 125.1, 121.8, 121.7, 107.5, 107.1, 48.4, 47.8, 38.1, 38.0, 29.4, 29.2.

**HRMS** (ESI): *m/z* calcd for C<sub>18</sub>H<sub>17</sub>O<sub>2</sub>ClN<sup>+</sup> [M + H]<sup>+</sup> 314.0942 found 314.0937.

**IR** (ν<sub>max</sub>/cm<sup>-1</sup>) 1723, 1494, 1405, 1352, 1199, 1074, 821, 749, 689.

**SFC Conditions:** Chiralpak IA; Gradient 1; 99:1 er (major enantiomer *t<sub>R</sub>* = 4.31 min; minor enantiomer *t<sub>R</sub>* = 4.17 min), **98% ee**. [α]<sub>D</sub><sup>25</sup> = -50.1 (c = 2.0, CHCl<sub>3</sub>).

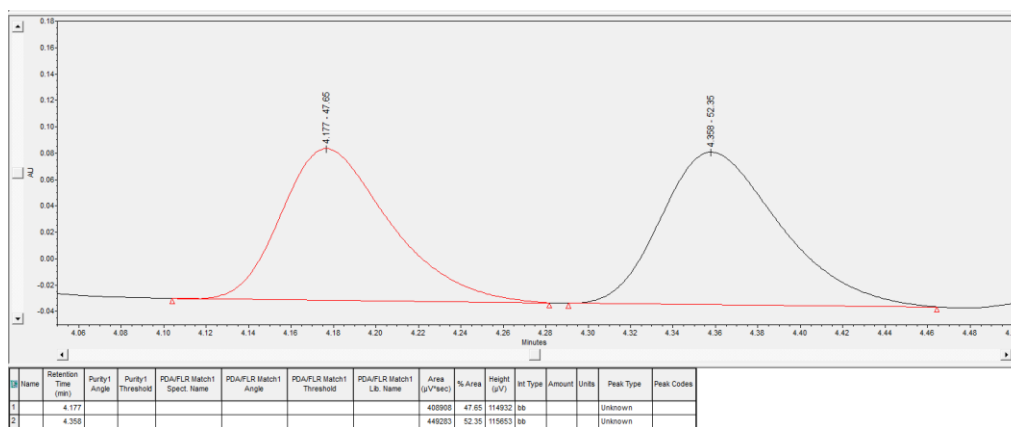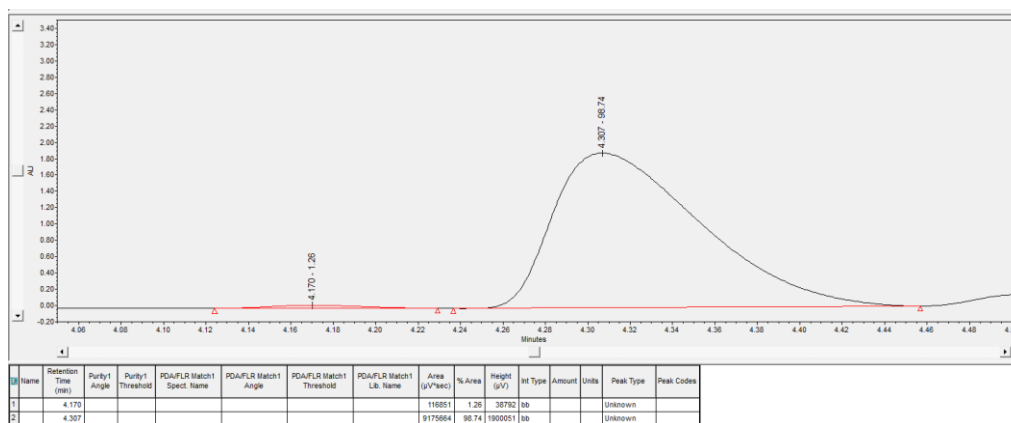



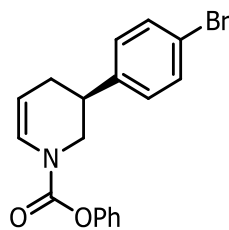

**Phenyl-(S)-3-(4-bromophenyl)-3,4-dihydropyridine-1(2H)-carboxylate (3k):** The corresponding compound was prepared following general procedure **A** using 4-bromophenyl boronic acid and phenyl pyridine-1(2H)-carboxylate. The mixture was stirred at 70 °C for 20 hours. Purification by flash chromatography (2% acetone/petrol to 20% acetone/petrol) afforded compound **3k** as white solid (60% yield, 98% ee).

**<sup>1</sup>H NMR** (400 MHz, CDCl<sub>3</sub>) (2 rotamers): δ (ppm) 7.51 – 7.32 (m, 5H), 7.25 – 7.00 (m, 5H), 5.25 – 5.08 (m, 1H), 4.37 – 4.15 (m, 1H), 3.52 – 3.24 (ddd, *J* = 70.1, 12.6, 11.0 Hz, 1H), 3.16 – 3.01 (m, 1H), 2.53 – 2.13 (m, 2H). **<sup>13</sup>C NMR** (101 MHz, CDCl<sub>3</sub>) (2 rotamers): δ (ppm) 152.0, 151.8, 151.2, 151.0, 141.8, 141.7, 132.0, 131.9, 129.5, 129.47, 129.1, 129.0, 125.8, 125.5, 125.1, 121.8, 121.7, 107.5, 107.1, 48.3, 47.7, 38.2, 38.1, 29.3, 29.2.

**HRMS** (ESI): *m/z* calcd for C<sub>18</sub>H<sub>17</sub>O<sub>2</sub>BrN<sup>+</sup> [M + H]<sup>+</sup> 358.0437 found 358.0430.

**IR** (ν<sub>max</sub>/cm<sup>-1</sup>) 1721, 1492, 1405, 1361, 1254, 1199, 1072, 1009, 816, 749, 689, 689.

**SFC Conditions:** Chiralpak IE; Gradient 1; 99:1 er (major enantiomer *t<sub>R</sub>* = 5.34 min; minor enantiomer *t<sub>R</sub>* = 5.11 min), **98% ee**. [α]<sub>D</sub><sup>25</sup> = -60.1 (c = 2.0, CHCl<sub>3</sub>).

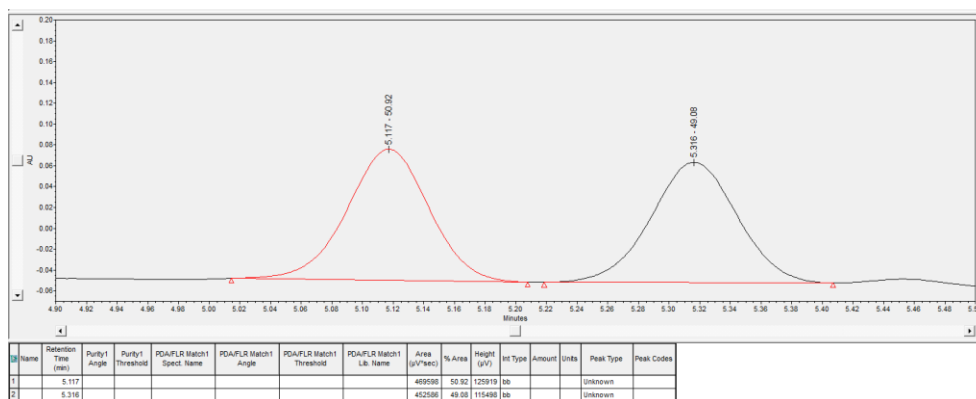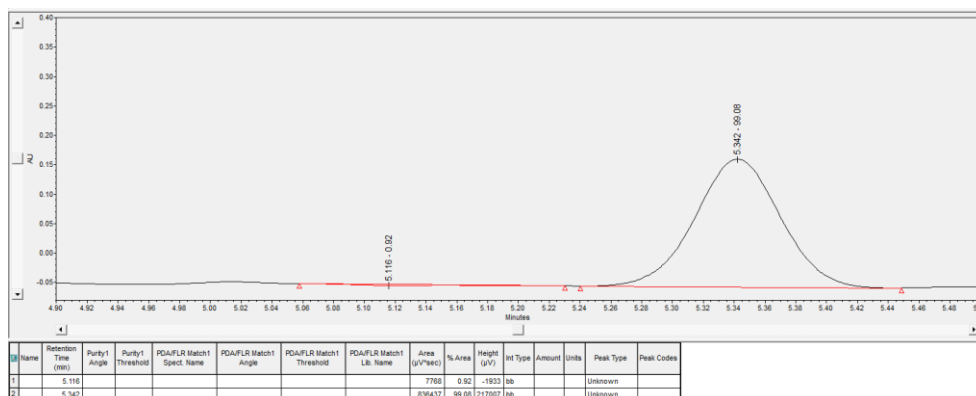

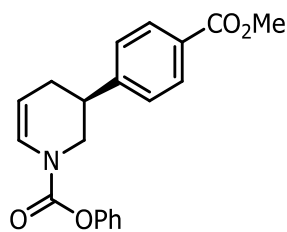

**Phenyl-(S)-3-(4-(methoxycarbonyl)phenyl)-3,4-dihydropyridine-1(2H)-**

**carboxylate (3I):** The corresponding compound was prepared following general procedure **A** using 4-(methoxycarbonyl)phenyl boronic acid and phenyl pyridine-1(2H)-carboxylate. The mixture was stirred at 70 °C for 20 hours. Purification by flash chromatography (5% acetone/petrol to 20% acetone/petrol) afforded compound **3I** as viscous liquid (62% yield, 97% ee).

**<sup>1</sup>H NMR** (500 MHz, CDCl<sub>3</sub>) (2 rotamers): δ (ppm) 8.07 – 7.97 (m, 2H), 7.43 – 7.30 (m, 5H), 7.24 – 7.01 (m, 3H), 5.20 – 5.12 (m, 1H), 4.34 – 4.24 (m, 1H), 3.94 – 3.90 (m, 3H), 3.56 – 3.31 (m, 1H), 3.16 (ddt, *J* = 15.6, 10.0, 4.5 Hz, 1H), 2.45 – 2.29 (m, 2H). **<sup>13</sup>C NMR** (126 MHz, CDCl<sub>3</sub>) (2 rotamers): δ (ppm) 167.0, 152.1, 151.8, 151.2, 151.0, 148.0, 147.9, 130.2, 130.17, 129.5, 129.48, 129.1, 129.06, 127.4, 127.38, 125.8, 125.5, 125.1, 121.8, 121.7, 107.5, 107.1, 52.3, 52.2, 48.1, 47.5, 38.8, 38.6, 29.2, 29.1.

**HRMS** (ESI): *m/z* calcd for C<sub>20</sub>H<sub>20</sub>O<sub>4</sub>N<sup>+</sup> [M + H]<sup>+</sup> 338.1387 found 338.1386.

**IR** (ν<sub>max</sub>/cm<sup>-1</sup>) 1721, 1406, 1360, 1281, 1200, 1112, 1075, 846, 751, 707, 690.

**SFC Conditions:** Chiralpak IC; Gradient 1; 98.5:1.5 er (major enantiomer *t<sub>R</sub>* = 6.41 min; minor enantiomer *t<sub>R</sub>* = 6.58 min), **97% ee**. [α]<sub>D</sub><sup>25</sup> = -60.7 (c = 2.0, CHCl<sub>3</sub>).

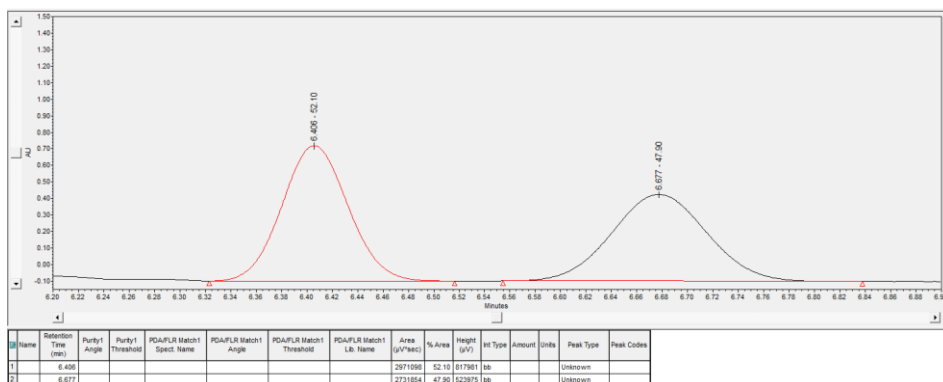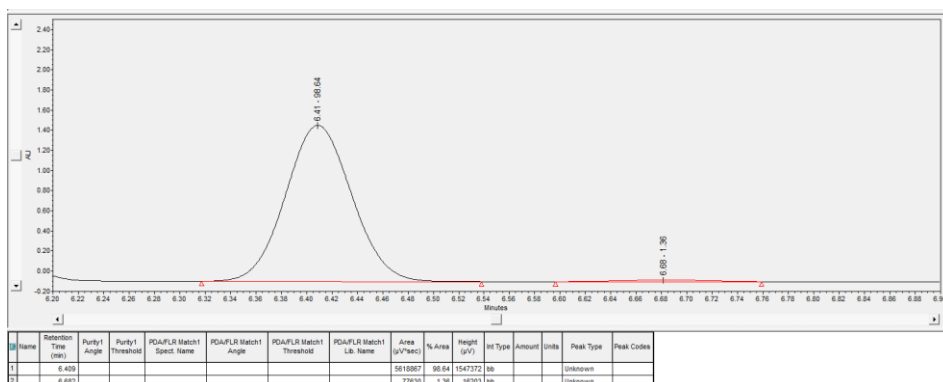

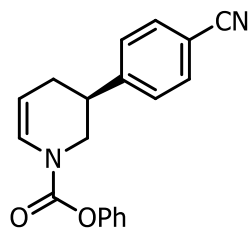

**Phenyl-(S)-3-(4-cyanophenyl)-3,4-dihydropyridine-1(2H)-carboxylate (3m):** The corresponding compound was prepared following general procedure **A** using 4-cyanophenyl boronic acid and phenyl pyridine-1(2H)-carboxylate. The mixture was stirred at 70 °C for 20 hours. Purification by flash chromatography (2% acetone/petrol to 25% acetone/petrol) afforded compound **3m** as viscous liquid (37% yield, 96% ee).

**<sup>1</sup>H NMR** (500 MHz, CDCl<sub>3</sub>) (2 rotamers): δ (ppm) 7.64 (dt, *J* = 8.1, 5.7 Hz, 2H), 7.37 (qd, *J* = 8.1, 4.4 Hz, 4H), 7.25 – 7.00 (m, 4H), 5.25 – 5.10 (m, 1H), 4.26 (dddd, *J* = 14.6, 12.6, 3.9, 1.7 Hz, 1H), 3.58 – 3.32 (m, 1H), 3.18 (qdd, *J* = 10.0, 7.5, 4.4 Hz, 1H), 2.50 – 2.25 (m, 2H).

**<sup>13</sup>C NMR** (126 MHz, CDCl<sub>3</sub>) (2 rotamers): δ (ppm) 152.0, 151.7, 151.1, 150.9, 148.2, 148.1, 132.7, 132.68, 129.53, 129.5, 128.2, 128.18, 125.9, 125.6, 125.2, 121.7, 121.6, 118.8, 107.1, 106.7, 47.8, 47.2, 38.8, 38.6, 29.0, 28.9.

**HRMS** (ESI): *m/z* calcd for C<sub>19</sub>H<sub>17</sub>O<sub>2</sub>N<sub>2</sub><sup>+</sup> [M + H]<sup>+</sup> 305.1285 found 305.1290.

**IR** (ν<sub>max</sub>/cm<sup>-1</sup>) 2229, 1720, 1408, 1343, 1266, 1200, 1164, 1073, 831, 752, 689.

**SFC Conditions:** Chiralpak IE; Gradient 1; 99.5:0.5 er (major enantiomer *t<sub>R</sub>* = 6.16 min; minor enantiomer *t<sub>R</sub>* = 6.07 min), **96% ee**. [α]<sub>D</sub><sup>25</sup> = -75.6 (c = 2.0, CHCl<sub>3</sub>).

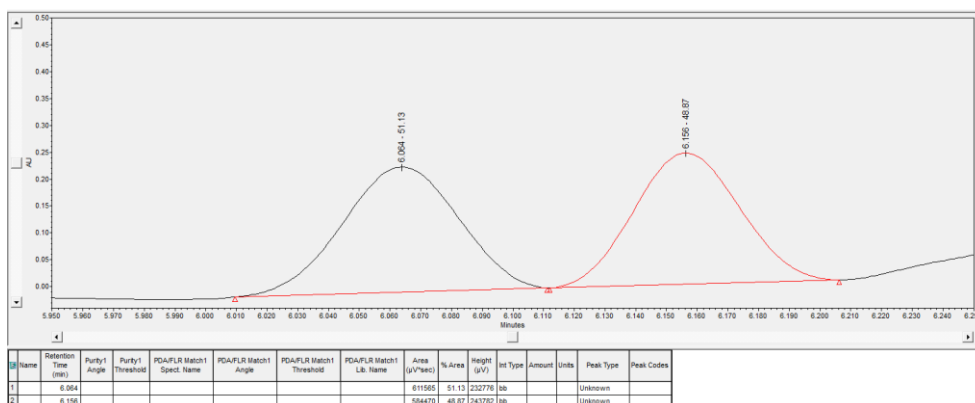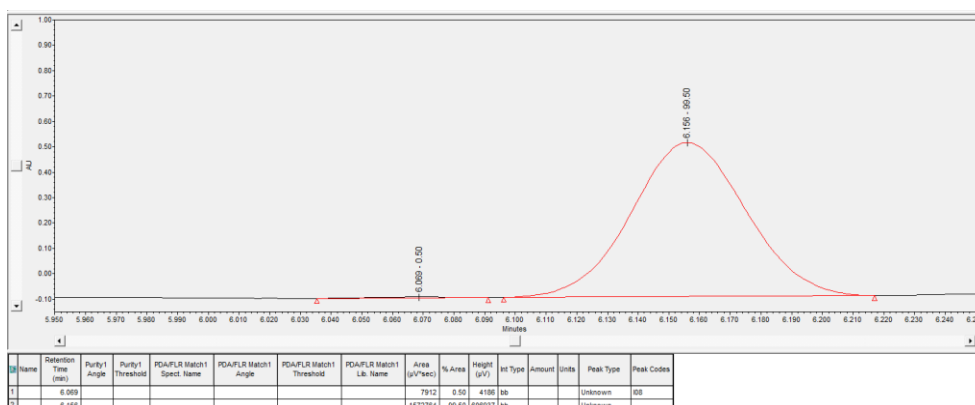

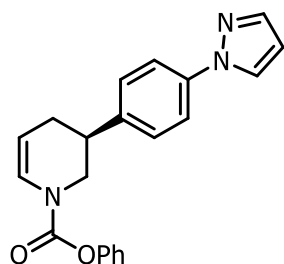

**Phenyl-(S)-3-(4-(1H-pyrazol-1-yl)phenyl)-3,4-dihydropyridine-1(2H)-carboxylate (3n):**

The corresponding compound was prepared following general procedure **A** using 4-(1H-pyrazol-1-yl)phenyl boronic acid and phenyl pyridine-1(2H)-carboxylate. The mixture was stirred at 70 °C for 20 hours. Purification by flash chromatography (2% acetone/petrol to 25% acetone/petrol) afforded compound **3n** as viscous liquid (58% yield, 96% ee).

**<sup>1</sup>H NMR** (500 MHz, CDCl<sub>3</sub>) (2 rotamers): δ (ppm) 7.92 (d, *J* = 2.4 Hz, 1H), 7.73 (d, *J* = 2.5 Hz, 1H), 7.68 (dt, *J* = 8.3, 6.2 Hz, 2H), 7.40 – 7.31 (m, 4H), 7.25 – 7.01 (m, 4H), 6.47 (q, *J* = 2.4 Hz, 1H), 5.27 – 5.10 (m, 1H), 4.39 – 4.22 (m, 1H), 3.57 – 3.29 (m, 1H), 3.24 – 3.05 (m, 1H), 2.52 – 2.27 (m, 2H). **<sup>13</sup>C NMR** (126 MHz, CDCl<sub>3</sub>) (2 rotamers): δ (ppm) 152.1, 151.8, 151.2, 151.0, 141.2, 141.0, 140.9, 139.2, 129.5, 129.4, 128.3, 128.28, 126.8, 125.7, 125.4, 125.0, 121.8, 121.7, 119.6, 119.59, 107.7, 107.6, 107.2, 48.4, 47.8, 38.2, 38.0, 29.4, 29.3.

**HRMS** (ESI): *m/z* calcd for C<sub>21</sub>H<sub>20</sub>O<sub>2</sub>N<sub>3</sub><sup>+</sup> [M + H]<sup>+</sup> 346.1550 found 346.1553.

**IR** (ν<sub>max</sub>/cm<sup>-1</sup>) 1717, 1526, 1396, 1335, 1254, 1200, 1164, 1074, 1047, 937, 833, 751, 690.

**SFC Conditions:** Chiralpak IF; Gradient 2; 98:2 er (major enantiomer *t<sub>R</sub>* = 4.28 min; minor enantiomer *t<sub>R</sub>* = 4.66 min), **96% ee**. [α]<sub>D</sub><sup>25</sup> = -56.6 (*c* = 2.0, CHCl<sub>3</sub>).

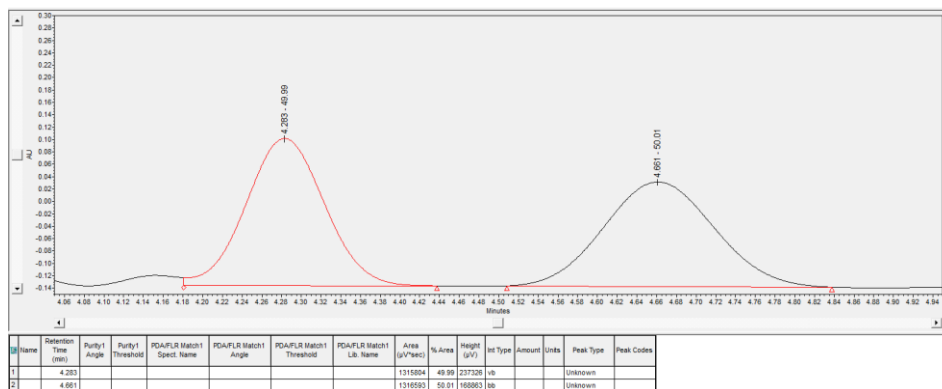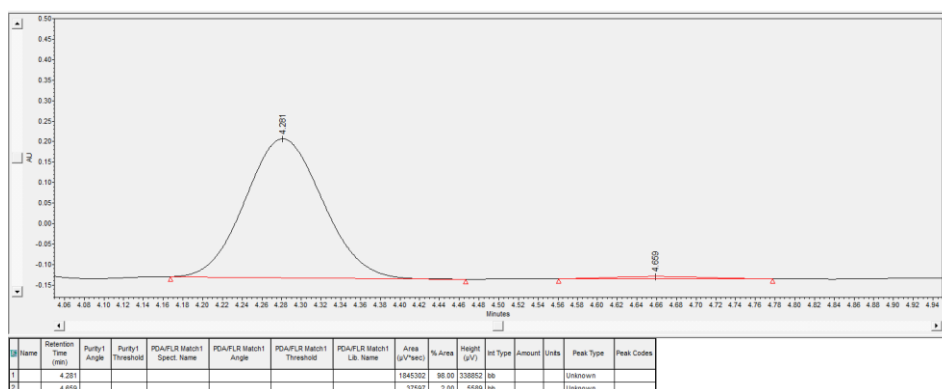

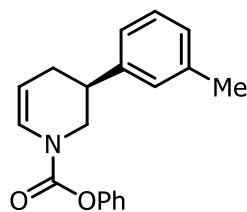

**Phenyl-(S)-3-(m-tolyl)-3,4-dihydropyridine-1(2H)-carboxylate (3o):** The corresponding compound was prepared following general procedure **A** using *m*-tolyl boronic acid and phenyl pyridine-1(2H)-carboxylate. The mixture was stirred at 70 °C for 20 hours. Purification by flash chromatography (2% acetone/petrol to 25% acetone/petrol) afforded compound **3o** as viscous liquid (70% yield, 96% ee).

**<sup>1</sup>H NMR** (400 MHz, CDCl<sub>3</sub>) (2 rotamers): δ (ppm) 7.44 – 7.31 (m, 2H), 7.31 – 6.98 (m, 8H), 5.26 – 5.10 (m, 1H), 4.37 – 4.25 (m, 1H), 3.53 – 3.18 (m, 1H), 3.06 (dddd, *J* = 15.2, 10.6, 8.8, 3.7 Hz, 1H), 2.41 – 2.29 (m, 5H). **<sup>13</sup>C NMR** (101 MHz, CDCl<sub>3</sub>) (2 rotamers): δ (ppm) 152.1, 151.7, 151.2, 151.1, 142.8, 142.6, 138.5, 138.4, 129.5, 129.4, 128.8, 128.7, 128.1, 127.9, 127.8, 125.7, 125.6, 125.2, 124.9, 124.3, 124.3, 121.8, 121.7, 107.9, 107.5, 48.6, 48.0, 38.7, 38.5, 29.5, 29.4, 21.6.

**HRMS** (ESI): *m/z* calcd for C<sub>19</sub>H<sub>20</sub>O<sub>2</sub>N<sup>+</sup> [M + H]<sup>+</sup> 294.1489 found 294.1496.

**IR** (ν<sub>max</sub>/cm<sup>-1</sup>) 1724, 1406, 1360, 1203, 1074, 786, 750, 725, 704, 689.

**SFC Conditions:** Chiralpak IC; Gradient 1; 98:2 er (major enantiomer *t*<sub>R</sub> = 4.01 min; minor enantiomer *t*<sub>R</sub> = 4.22 min), **96% ee**. [α]<sup>25</sup><sub>D</sub> = -52.3 (*c* = 2.0, CHCl<sub>3</sub>).

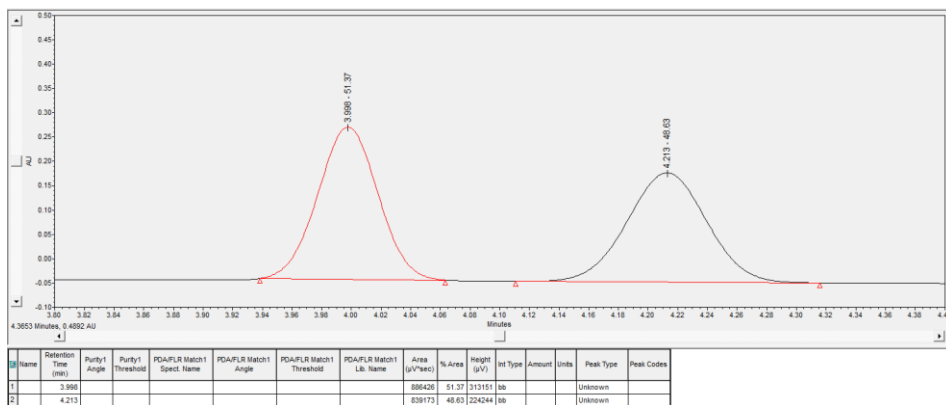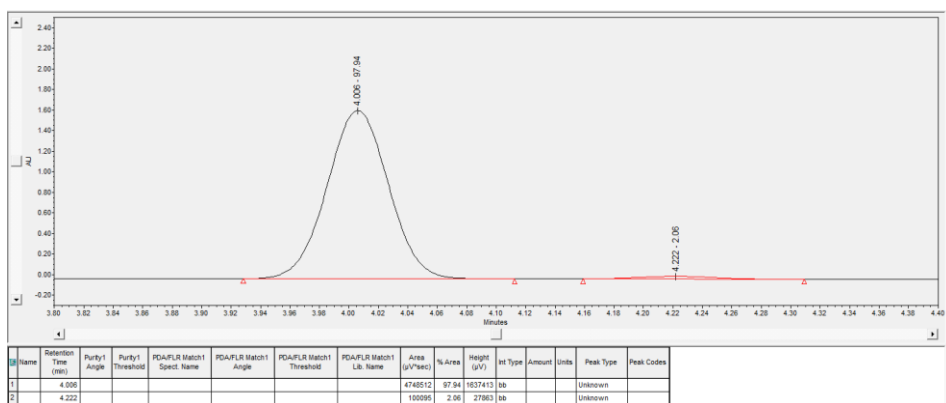

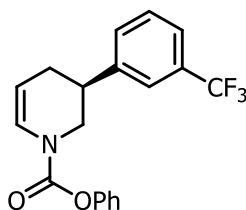

**Phenyl-(S)-3-(3-(trifluoromethyl)phenyl)-3,4-dihydropyridine-1(2H)-carboxylate (3p):** The corresponding compound was prepared following general procedure **A** using 3-(trifluoromethyl)phenyl boronic acid and phenyl pyridine-1(2H)-carboxylate. The mixture was stirred at 70 °C for 20 hours. Purification by flash chromatography (2% acetone/petrol to 20% acetone/petrol) afforded compound **3p** as viscous liquid (60% yield, 97% ee).

**<sup>1</sup>H NMR** (500 MHz, CDCl<sub>3</sub>) (2 rotamers): δ (ppm) 7.57 – 7.44 (m, 5H), 7.38 (dt, *J* = 11.3, 8.0 Hz, 2H), 7.26 – 7.02 (m, 4H), 5.28 – 5.11 (m, 1H), 4.36 – 4.25 (m, 1H), 3.59 – 3.30 (m, 1H), 3.19 (dddd, *J* = 20.1, 10.2, 7.7, 3.7 Hz, 1H), 2.48 – 2.31 (m, 2H). **<sup>13</sup>C NMR** (126 MHz, CDCl<sub>3</sub>) (2 rotamers): δ (ppm) 152.0, 151.8, 151.2, 151.0, 143.7, 143.6, 130.8, 129.5, 129.48, 129.4, 129.3, 125.8, 125.5, 125.2, 124.1, 124.07, 121.8, 121.7, 107.3, 107.0, 48.2, 47.6, 38.6, 38.4, 29.3, 29.2. **<sup>19</sup>F NMR** (471 MHz, CDCl<sub>3</sub>) (2 rotamers): δ (ppm) –62.5, –62.6.

**HRMS** (ESI): *m/z* calcd for C<sub>19</sub>H<sub>16</sub>O<sub>2</sub>F<sub>3</sub>N<sup>+</sup> [*M* + H]<sup>+</sup> 348.1206 found 348.1210.

**IR** (ν<sub>max</sub>/cm<sup>-1</sup>) 1724, 1408, 1331, 1257, 1202, 1164, 1124, 1074, 803, 752, 703, 689.

**SFC Conditions:** Chiralpak IA; Gradient 1; 98.5:1.5 er (major enantiomer *t<sub>R</sub>* = 2.45 min; minor enantiomer *t<sub>R</sub>* = 2.38 min), **97% ee**. [α]<sub>D</sub><sup>25</sup> = –39.4 (*c* = 2.0, CHCl<sub>3</sub>).

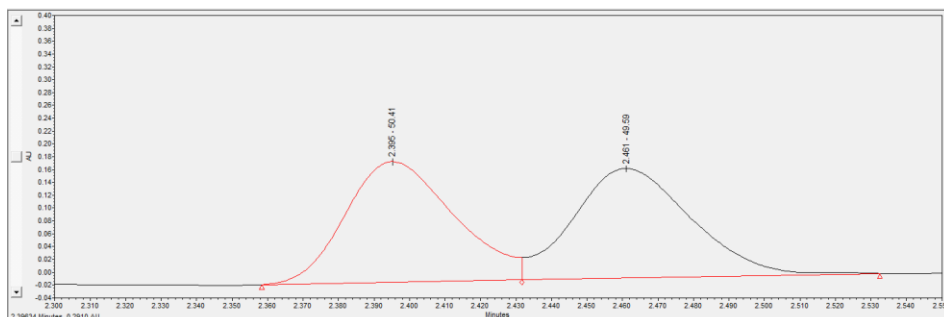

| Name | Retention Time (min) | Purity1 Angle | Purity1 Threshold | PSA/FLR Match1 Spect. Name | PSA/FLR Match1 Angle | PSA/FLR Match1 Threshold | PSA/FLR Match1 Lib. Name | Area (μV*sec) | % Area | Height (μV) | Int. Type | Amount | Units | Peak Type | Peak Codes |
|------|----------------------|---------------|-------------------|----------------------------|----------------------|--------------------------|--------------------------|---------------|--------|-------------|-----------|--------|-------|-----------|------------|
| 1    | 2.385                |               |                   |                            |                      |                          |                          | 400550        | 50.41  | 185149      | bv        |        |       | Unknown   |            |
| 2    | 2.461                |               |                   |                            |                      |                          |                          | 380552        | 49.59  | 170639      | vb        |        |       | Unknown   |            |

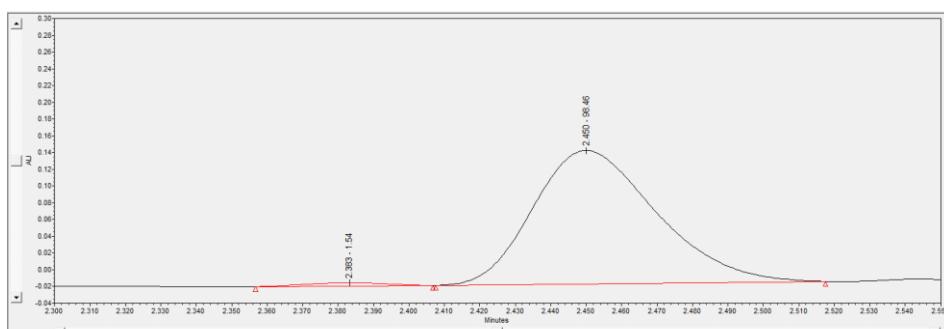

| Name | Retention Time (min) | Purity1 Angle | Purity1 Threshold | PSA/FLR Match1 Spect. Name | PSA/FLR Match1 Angle | PSA/FLR Match1 Threshold | PSA/FLR Match1 Lib. Name | Area (μV*sec) | % Area | Height (μV) | Int. Type | Amount | Units | Peak Type | Peak Codes |
|------|----------------------|---------------|-------------------|----------------------------|----------------------|--------------------------|--------------------------|---------------|--------|-------------|-----------|--------|-------|-----------|------------|
| 1    | 2.383                |               |                   |                            |                      |                          |                          | 6921          | 1.54   | 3830        | bb        |        |       | Unknown   |            |
| 2    | 2.450                |               |                   |                            |                      |                          |                          | 384722        | 98.46  | 159410      | bb        |        |       | Unknown   |            |

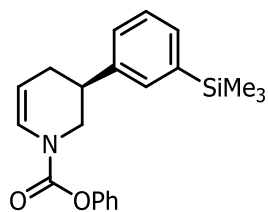

### Phenyl-(S)-3-(3-(trimethylsilyl)phenyl)-3,4-dihydropyridine-1(2H)-carboxylate

**(3q):** The corresponding compound was prepared following general procedure **A** using 3-(trimethylsilyl)phenyl boronic acid and phenyl pyridine-1(2H)-carboxylate. The mixture was stirred at 70 °C for 20 hours. Purification by flash chromatography (2% acetone/petrol to 10% acetone/petrol) afforded compound **3q** as viscous liquid (70% yield, 96% ee).

**<sup>1</sup>H NMR** (500 MHz, CDCl<sub>3</sub>) (2 rotamers): δ (ppm) 7.49 – 7.34 (m, 5H), 7.29 – 7.03 (m, 5H), 5.29 – 5.13 (m, 1H), 4.39 – 4.28 (m, 1H), 3.57 – 3.29 (m, 1H), 3.13 (pd, *J* = 11.8, 3.8 Hz, 1H), 2.46 – 2.31 (m, 2H), 0.34 – 0.28 (m, 9H). **<sup>13</sup>C NMR** (101 MHz, CDCl<sub>3</sub>) (2 rotamers): δ (ppm) 152.1, 151.8, 151.2, 151.1, 142.0, 141.9, 141.3, 141.2, 132.4, 132.4, 132.2, 132.1, 129.5, 128.3, 128.2, 127.7, 127.6, 125.7, 125.6, 125.3, 124.9, 121.8, 121.7, 107.9, 107.6, 48.6, 48.0, 38.9, 38.8, 29.5, 29.49, -1.0.

**HRMS** (ESI): *m/z* calcd for C<sub>21</sub>H<sub>26</sub>O<sub>2</sub>NSi<sup>+</sup> [M + H]<sup>+</sup> 352.1727 found 352.1734.

**IR** (ν<sub>max</sub>/cm<sup>-1</sup>) 1727, 1656, 1405, 1358, 1249, 1202, 858, 839, 751, 689, 690.

**SFC Conditions:** Chiralpak IG; Gradient 1; 98:2 er (major enantiomer *t<sub>R</sub>* = 3.00 min; minor enantiomer *t<sub>R</sub>* = 2.84 min), **96% ee**. [α]<sub>D</sub><sup>25</sup> = -22.7 (*c* = 2.0, CHCl<sub>3</sub>).

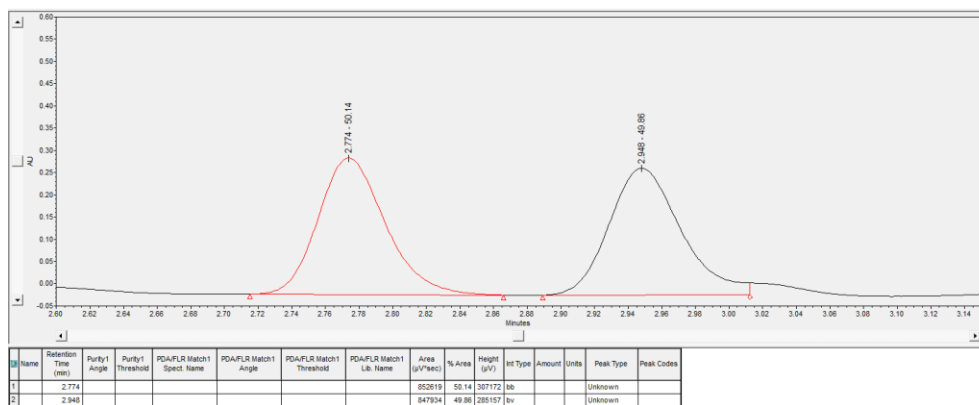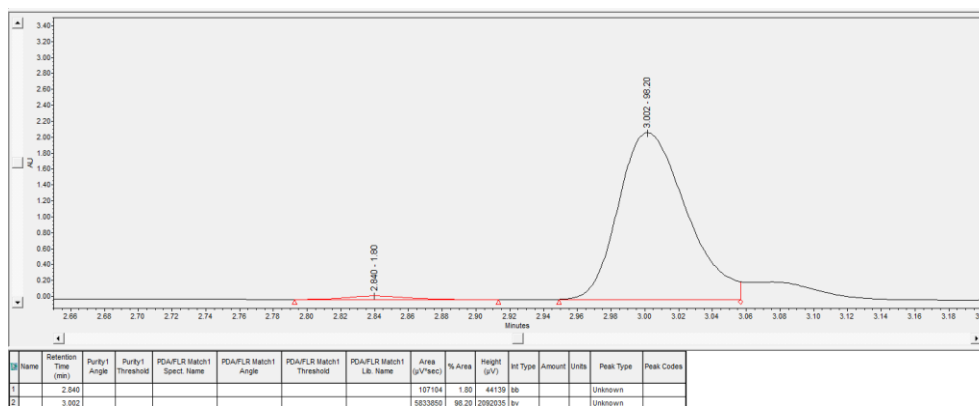

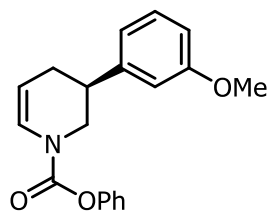

**Phenyl-(S)-3-(3-methoxyphenyl)-3,4-dihydropyridine-1(2H)-carboxylate (3r):**

The corresponding compound was prepared following general procedure **A** using 3-methoxyphenyl boronic acid and phenyl pyridine-1(2H)-carboxylate. The mixture was stirred at 70 °C for 20 hours. Purification by flash chromatography (2% acetone/petrol to 20% acetone/petrol) afforded compound **3r** as viscous liquid (79% yield, 98% ee).

**<sup>1</sup>H NMR** (400 MHz, CDCl<sub>3</sub>) (2 rotamers): δ (ppm) 7.42 – 7.33 (m, 2H), 7.32 – 6.99 (m, 5H), 6.90 – 6.78 (m, 3H), 5.26 – 5.10 (m, 1H), 4.32 (ddd, *J* = 11.5, 9.7, 3.7 Hz, 1H), 3.85 – 3.72 (m, 3H), 3.53 – 3.26 (m, 1H), 3.08 (qdd, *J* = 10.2, 6.1, 3.8 Hz, 1H), 2.45 – 2.27 (m, 2H). **<sup>13</sup>C NMR** (126 MHz, CDCl<sub>3</sub>) (2 rotamers): δ (ppm) 160.0, 159.96, 152.1, 151.7, 151.2, 151.0, 144.5, 144.3, 129.9, 129.8, 129.5, 129.4, 125.7, 125.6, 125.3, 124.9, 121.8, 121.7, 119.6, 113.5, 113.3, 112.1, 112.08, 107.8, 107.4, 55.32, 55.3, 48.5, 47.9, 38.8, 38.6, 29.4, 29.3.

**HRMS** (ESI): *m/z* calcd for C<sub>19</sub>H<sub>20</sub>O<sub>3</sub>N<sup>+</sup> [M + H]<sup>+</sup> 310.1438 found 310.1441.

**IR** (ν<sub>max</sub>/cm<sup>-1</sup>) 1723, 1655, 1600, 1494, 1406, 1376, 1360, 1266, 1204, 784, 751.

**SFC Conditions:** Chiralpak IC; Gradient 1; 99:1 er (major enantiomer *t<sub>R</sub>* = 4.65 min; minor enantiomer *t<sub>R</sub>* = 4.89 min), **98% ee**. [α]<sub>D</sub><sup>25</sup> = -29.8 (c = 2.0, CHCl<sub>3</sub>).

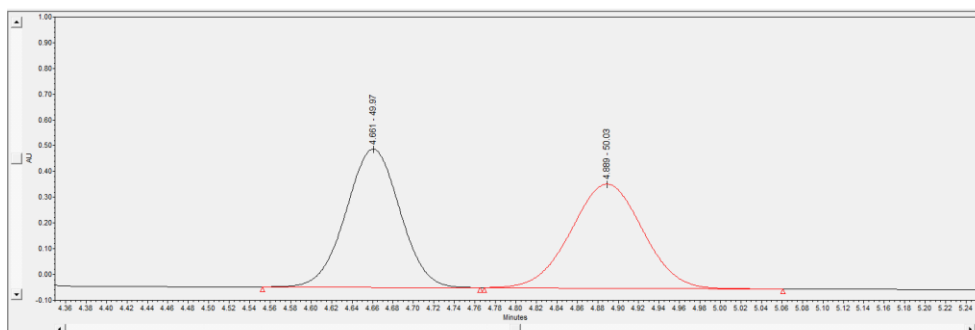

| Peak Name | Retention Time (min) | Purity1 Angle | Purity1 Threshold | FOA/FLR Match1 Spect. Name | FOA/FLR Match1 Angle | FOA/FLR Match1 Threshold | FOA/FLR Match1 Lib. Name | Area (μV*sec) | % Area | Height (μV) | Int Type | Amount | Units | Peak Type | Peak Codes |
|-----------|----------------------|---------------|-------------------|----------------------------|----------------------|--------------------------|--------------------------|---------------|--------|-------------|----------|--------|-------|-----------|------------|
| 1         | 4.651                |               |                   |                            |                      |                          |                          | 1987215       | 49.97  | 535996      | bb       |        |       | Unknown   |            |
| 2         | 4.889                |               |                   |                            |                      |                          |                          | 1989204       | 50.03  | 404262      | bb       |        |       | Unknown   |            |

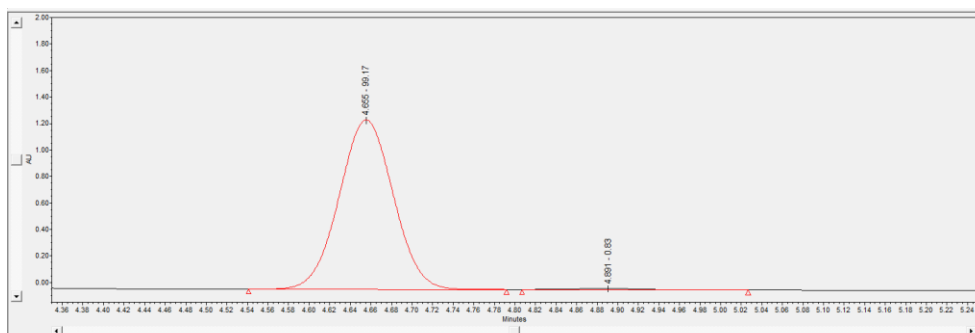

| Peak Name | Retention Time (min) | Purity1 Angle | Purity1 Threshold | FOA/FLR Match1 Spect. Name | FOA/FLR Match1 Angle | FOA/FLR Match1 Threshold | FOA/FLR Match1 Lib. Name | Area (μV*sec) | % Area | Height (μV) | Int Type | Amount | Units | Peak Type | Peak Codes |
|-----------|----------------------|---------------|-------------------|----------------------------|----------------------|--------------------------|--------------------------|---------------|--------|-------------|----------|--------|-------|-----------|------------|
| 1         | 4.655                |               |                   |                            |                      |                          |                          | 4874488       | 99.17  | 1278233     | bb       |        |       | Unknown   |            |
| 2         | 4.891                |               |                   |                            |                      |                          |                          | 38957         | 0.83   | 8584        | bb       |        |       | Unknown   |            |



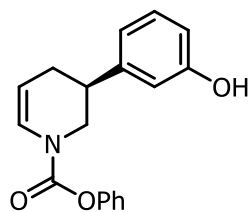

**Phenyl-(S)-3-(3-hydroxyphenyl)-3,4-dihydropyridine-1(2H)-carboxylate (3s):** The corresponding compound was prepared following general procedure **A** using 3-hydroxyphenyl boronic acid and phenyl pyridine-1(2H)-carboxylate. The mixture was stirred at 70 °C for 20 hours. Purification by flash chromatography (5% acetone/petrol to 30% acetone/petrol) afforded compound **3s** as viscous liquid (41% yield, 83% ee).

**<sup>1</sup>H NMR** (400 MHz, CDCl<sub>3</sub>) (2 rotamers): δ (ppm) 7.36 (dtd, *J* = 9.1, 7.4, 1.9 Hz, 2H), 7.26 – 6.95 (m, 5H), 6.82 (dtd, *J* = 10.5, 7.4, 1.4 Hz, 1H), 6.74 – 6.67 (m, 2H), 5.25 – 5.09 (m, 2H), 4.34 – 4.22 (m, 1H), 3.51 – 3.22 (m, 1H), 3.12 – 2.93 (m, 1H), 2.42 – 2.22 (m, 2H). **<sup>13</sup>C NMR** (101 MHz, CDCl<sub>3</sub>) (2 rotamers): δ (ppm) 156.2, 156.1, 152.3, 151.9, 151.2, 151.0, 144.7, 144.5, 130.05, 130.0, 129.5, 129.49, 125.81, 125.8, 125.2, 124.9, 121.8, 121.7, 119.62, 119.6, 114.30, 114.29, 114.1, 114.06, 108.1, 107.7, 48.5, 47.9, 38.6, 38.4, 29.4, 29.2.

**HRMS** (ESI): *m/z* calcd for C<sub>18</sub>H<sub>18</sub>O<sub>3</sub>N<sup>+</sup> [M + H]<sup>+</sup> 296.1281 found 296.1280.

**IR** (ν<sub>max</sub>/cm<sup>-1</sup>) 3393, 1699, 1656, 1591, 1494, 1456, 1409, 1361, 1203, 787, 753.

**SFC Conditions:** Chiralpak IE; Gradient 1; 91.5:8.5 er (major enantiomer *t<sub>R</sub>* = 5.35 min; minor enantiomer *t<sub>R</sub>* = 5.12 min), **83% ee**. [α]<sub>D</sub><sup>25</sup> = -37.3 (c = 2.0, CHCl<sub>3</sub>).

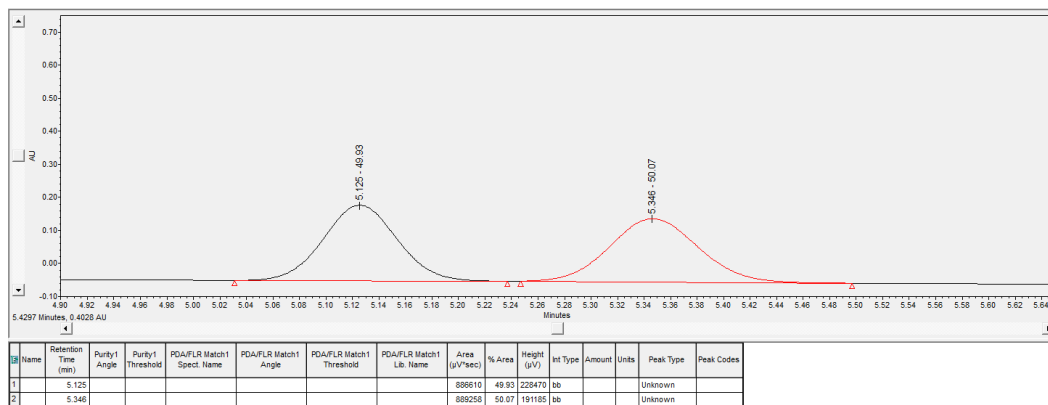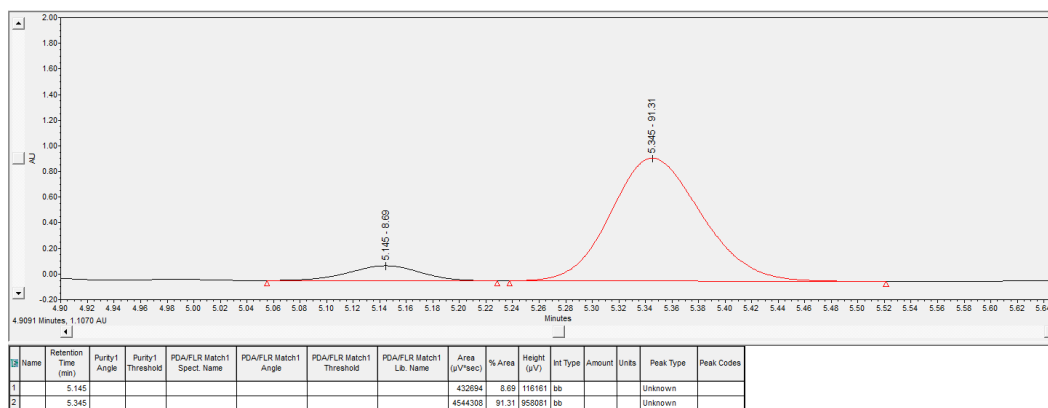

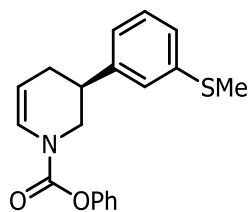

**Phenyl-(S)-3-(3-(methylthio)phenyl)-3,4-dihydropyridine-1(2H)-carboxylate(3t):**

The corresponding compound was prepared following general procedure **A** using 3-(methylthio)phenyl boronic acid and phenyl pyridine-1(2H)-carboxylate. The mixture was stirred at 70 °C for 20 hours. Purification by flash chromatography (2% acetone/petrol to 25% acetone/petrol) afforded compound **3t** as viscous liquid (70% yield, 99% ee).

**<sup>1</sup>H NMR** (500 MHz, CDCl<sub>3</sub>) (2 rotamers): δ (ppm) 7.42 – 7.33 (m, 2H), 7.31 – 7.00 (m, 8H), 5.25 – 5.09 (m, 1H), 4.35 – 4.25 (m, 1H), 3.52 – 3.26 (m, 1H), 3.53 – 3.25 (m, 1H), 2.51 – 2.47 (m, 3H), 2.43 – 2.26 (m, 2H). **<sup>13</sup>C NMR** (126 MHz, CDCl<sub>3</sub>) (2 rotamers): δ (ppm) 152.1, 151.7, 151.2, 151.0, 143.5, 143.4, 139.1, 139.0, 129.5, 129.4, 129.36, 129.3, 125.7, 125.69, 125.64, 125.6, 125.3, 125.2, 125.15, 125.0, 124.1, 121.8, 121.7, 107.7, 107.3, 48.4, 47.8, 38.7, 38.6, 29.4, 29.3, 15.9.

**HRMS** (ESI): m/z calcd for C<sub>19</sub>H<sub>20</sub>O<sub>2</sub>SN<sup>+</sup> [M + H]<sup>+</sup> 326.1209 found 326.1211.

**IR** (ν<sub>max</sub>/cm<sup>-1</sup>) 1722, 1406, 1359, 1254, 1201, 1074, 786, 748, 690.

**SFC Conditions:** Chiralpak IC; Gradient 1; 99.5:0.5 er (major enantiomer t<sub>R</sub> = 5.11 min; minor enantiomer t<sub>R</sub> = 5.30 min), **99% ee**. [α]<sub>D</sub><sup>25</sup> = -40.2 (c = 2.0, CHCl<sub>3</sub>).

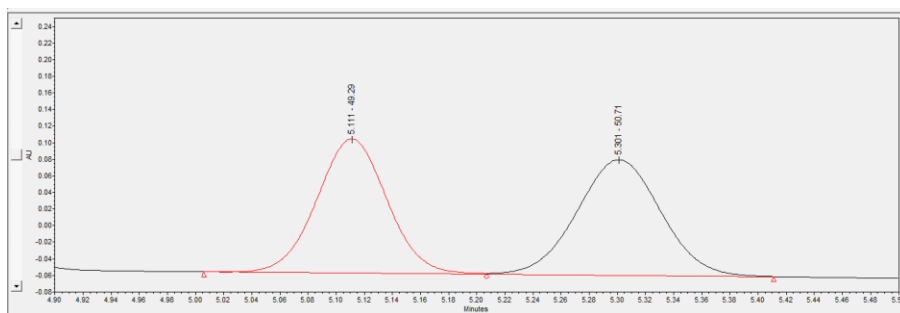

| # | Name | Retention Time (min) | Purity1 Angle | Purity1 Threshold | PDA/FLR Match1 Spect. Name | PDA/FLR Match1 Angle | PDA/FLR Match1 Threshold | PDA/FLR Match1 Lib. Name | Area (μV*sec) | % Area | Height (μV) | Int. Type | Amount | Units | Peak Type | Peak Codes |
|---|------|----------------------|---------------|-------------------|----------------------------|----------------------|--------------------------|--------------------------|---------------|--------|-------------|-----------|--------|-------|-----------|------------|
| 1 |      | 5.111                |               |                   |                            |                      |                          |                          | 862680        | 49.29  | 161511      | bb        |        |       | Unknown   |            |
| 2 |      | 5.301                |               |                   |                            |                      |                          |                          | 576990        | 56.71  | 138570      | bb        |        |       | Unknown   |            |

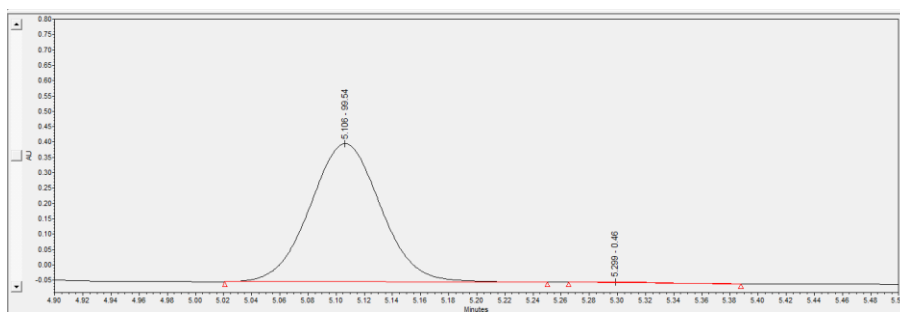

| # | Name | Retention Time (min) | Purity1 Angle | Purity1 Threshold | PDA/FLR Match1 Spect. Name | PDA/FLR Match1 Angle | PDA/FLR Match1 Threshold | PDA/FLR Match1 Lib. Name | Area (μV*sec) | % Area | Height (μV) | Int. Type | Amount | Units | Peak Type | Peak Codes |
|---|------|----------------------|---------------|-------------------|----------------------------|----------------------|--------------------------|--------------------------|---------------|--------|-------------|-----------|--------|-------|-----------|------------|
| 1 |      | 5.106                |               |                   |                            |                      |                          |                          | 1571207       | 99.54  | 450363      | bb        |        |       | Unknown   |            |
| 2 |      | 5.299                |               |                   |                            |                      |                          |                          | 7253          | 0.46   | 2511        | bb        |        |       | Unknown   | 05         |

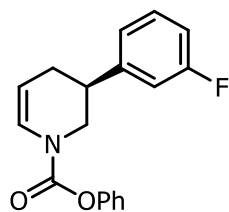

**Phenyl-(S)-3-(3-fluorophenyl)-3,4-dihydropyridine-1(2H)-carboxylate (3u):** The corresponding compound was prepared following general procedure **A** using 3-fluorophenyl boronic acid and phenyl pyridine-1(2H)-carboxylate. The mixture was stirred at 70 °C for 20 hours. Purification by flash chromatography (2% acetone/petrol to 20% acetone/petrol) afforded compound **3u** as viscous liquid (75% yield, 98% ee).

**<sup>1</sup>H NMR** (500 MHz, CDCl<sub>3</sub>) (2 rotamers): δ (ppm) 7.42 – 7.29 (m, 3H), 7.25 – 6.93 (m, 7H), 5.18 (dddd, *J* = 37.5, 8.1, 5.2, 2.6 Hz, 1H), 4.30 (ddq, *J* = 14.4, 12.7, 1.6 Hz, 1H), 3.41 (ddd, *J* = 86.7, 12.7, 11.2 Hz, 1H), 3.19 – 3.06 (m, 1H), 2.45 – 2.27 (m, 2H). **<sup>13</sup>C NMR** (126 MHz, CDCl<sub>3</sub>) (2 rotamers): δ (ppm) 163.2, 151.7, 151.2, 151.0, 145.4, 145.3, 130.4, 130.3, 129.5, 129.46, 125.8, 125.4, 125.0, 123.0, 121.8, 121.7, 114.3, 114.2, 114.0, 113.98, 107.5, 107.1, 48.3, 47.7, 38.5, 38.3, 29.3, 29.1. **<sup>19</sup>F NMR** (471 MHz, CDCl<sub>3</sub>) (2 rotamers): δ (ppm) –112.68, –112.81.

**HRMS** (ESI): *m/z* calcd for C<sub>18</sub>H<sub>17</sub>O<sub>2</sub>FN<sup>+</sup> [M + H]<sup>+</sup> 298.1238 found 298.1250.

**IR** (ν<sub>max</sub>/cm<sup>-1</sup>) 1723, 1656, 1591, 1407, 1361, 1266, 1203, 1076, 977, 860, 751, 729, 690.

**SFC Conditions:** Chiralpak IC; Gradient 1; 99:1 er (major enantiomer *t<sub>R</sub>* = 3.62 min; minor enantiomer *t<sub>R</sub>* = 3.83 min), **98% ee**. [α]<sub>D</sub><sup>25</sup> = –45.0 (*c* = 2.0, CHCl<sub>3</sub>).

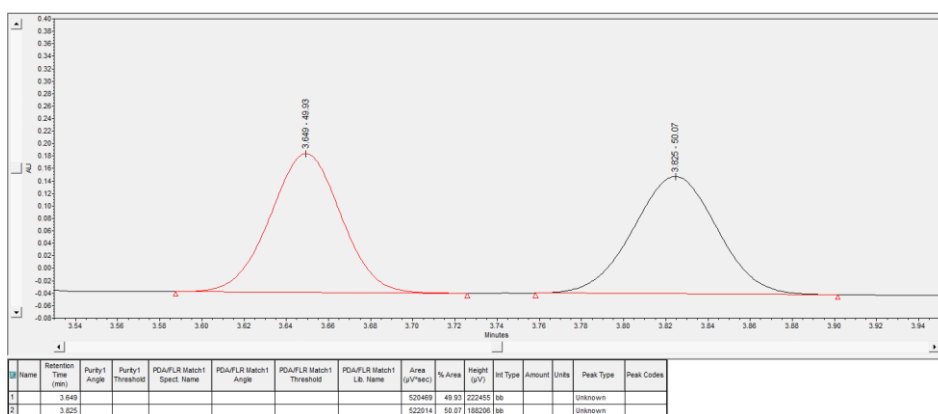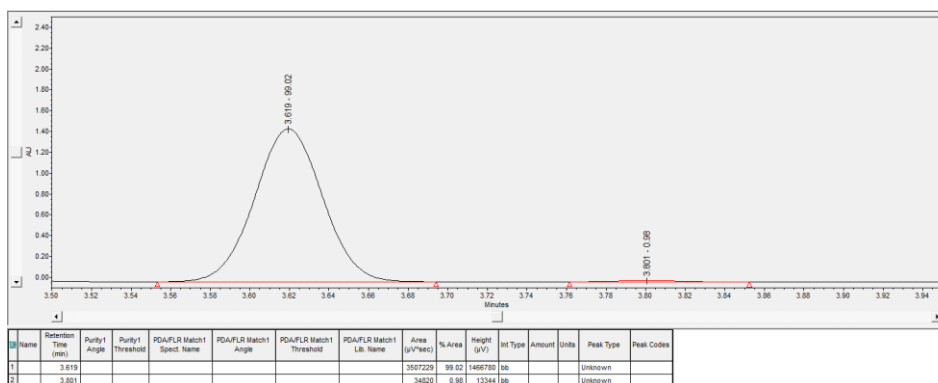

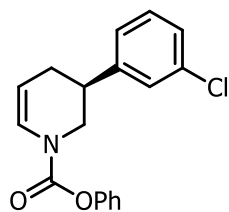

**Phenyl-(S)-3-(3-chlorophenyl)-3,4-dihydropyridine-1(2H)-carboxylate (3v):** The corresponding compound was prepared following general procedure **A** using 3-chlorophenyl boronic acid and phenyl pyridine-1(2H)-carboxylate. The mixture was stirred at 70 °C for 20 hours. Purification by flash chromatography (2% acetone/petrol to 20% acetone/petrol) afforded compound **3v** as viscous liquid (78% yield, 98% ee).

**<sup>1</sup>H NMR** (500 MHz, CDCl<sub>3</sub>) (2 rotamers): δ (ppm) 7.38 (td, *J* = 9.1, 7.5 Hz, 2H), 7.31 – 7.19 (m, 4H), 7.18 – 7.01 (m, 4H), 5.25 – 5.09 (m, 1H), 4.29 (dddd, *J* = 14.3, 12.6, 4.3, 1.6 Hz, 1H), 3.53 – 3.26 (m, 1H), 3.09 (dddd, *J* = 20.1, 10.4, 5.8, 2.7 Hz, 1H), 2.47 – 2.23 (m, 2H). **<sup>13</sup>C NMR** (126 MHz, CDCl<sub>3</sub>) (2 rotamers): δ (ppm) 152.0, 151.7, 151.2, 151.0, 144.8, 144.7, 134.7, 134.6, 130.2, 130.1, 129.5, 129.47, 127.6, 127.5, 127.3, 127.29, 125.8, 125.6, 125.4, 125.1, 121.8, 121.7, 107.4, 107.1, 48.2, 47.6, 38.5, 38.3, 29.3, 29.1.

**HRMS** (ESI): *m/z* calcd for C<sub>18</sub>H<sub>16</sub>O<sub>2</sub>ClN<sup>+</sup> [M + H]<sup>+</sup> 314.0942 found 314.0953.

**IR** (ν<sub>max</sub>/cm<sup>-1</sup>) 1722, 1406, 1359, 1258, 1201, 1164, 1074, 786, 749, 690.

**SFC Conditions:** Chiralpak IF; Gradient 1; 99:1 er (major enantiomer *t<sub>R</sub>* = 4.81 min; minor enantiomer *t<sub>R</sub>* = 5.00 min), **98% ee**. [α]<sub>D</sub><sup>25</sup> = -35.3 (*c* = 2.0, CHCl<sub>3</sub>).

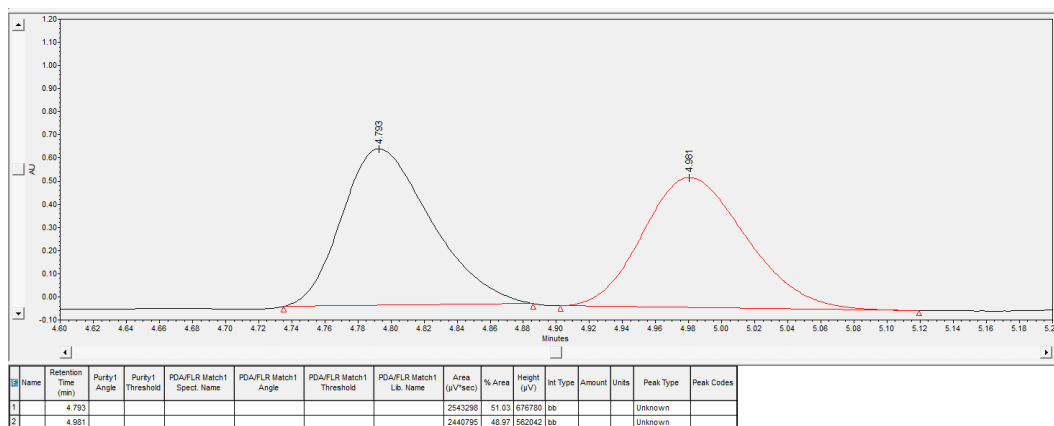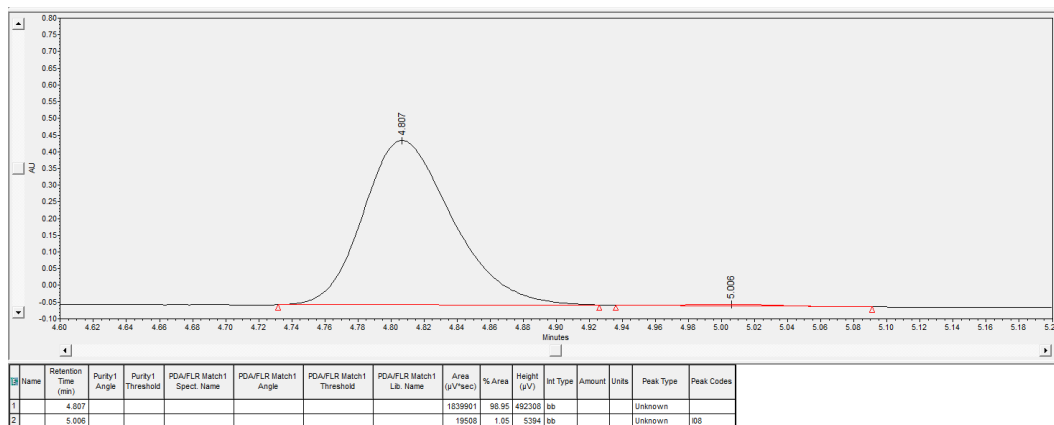

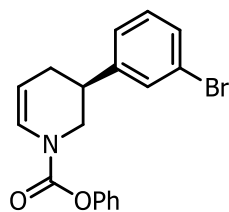

**Phenyl-(S)-3-(3-bromophenyl)-3,4-dihydropyridine-1(2H)-carboxylate (3w):** The corresponding compound was prepared following general procedure **A** using 3-bromophenyl boronic acid and phenyl pyridine-1(2H)-carboxylate. The mixture was stirred at 70 °C for 20 hours. Purification by flash chromatography (2% acetone/petrol to 20% acetone/petrol) afforded compound **3w** as viscous liquid (60% yield, 99% ee).

**<sup>1</sup>H NMR** (400 MHz, CDCl<sub>3</sub>) (2 rotamers): δ (ppm) 7.45 – 7.33 (m, 4H), 7.25 – 7.00 (m, 6H), 5.26 – 5.01 (m, 1H), 4.31 – 4.24 (m, 1H), 3.60 – 3.24 (m, 1H), 3.08 (tp, *J* = 10.4, 5.4 Hz, 1H), 2.46 – 2.25 (m, 2H). **<sup>13</sup>C NMR** (126 MHz, CDCl<sub>3</sub>) (2 rotamers): δ (ppm) 152.0, 151.7, 151.2, 151.0, 145.1, 145.0, 130.52, 130.5, 130.42, 130.4, 130.31, 130.3, 129.5, 129.48, 129.46, 129.4, 126.0, 125.8, 125.4, 125.1, 123.0, 122.9, 121.8, 121.7, 107.4, 107.1, 48.3, 47.7, 38.5, 38.3, 29.3, 29.2.

**HRMS** (ESI): *m/z* calcd for C<sub>18</sub>H<sub>17</sub>O<sub>2</sub>BrN<sup>+</sup> [M + H]<sup>+</sup> 358.0437 found 358.0434.

**IR** (ν<sub>max</sub>/cm<sup>-1</sup>) 1723, 1406, 1360, 1257, 1201, 1072, 783, 750, 690.

**SFC Conditions:** Chiralpak IG; Gradient 1; 99:1 er (major enantiomer *t<sub>R</sub>* = 5.80 min; minor enantiomer *t<sub>R</sub>* = 6.00 min), **98% ee**. [α]<sub>D</sub><sup>25</sup> = -34.5 (c = 2.0, CHCl<sub>3</sub>).

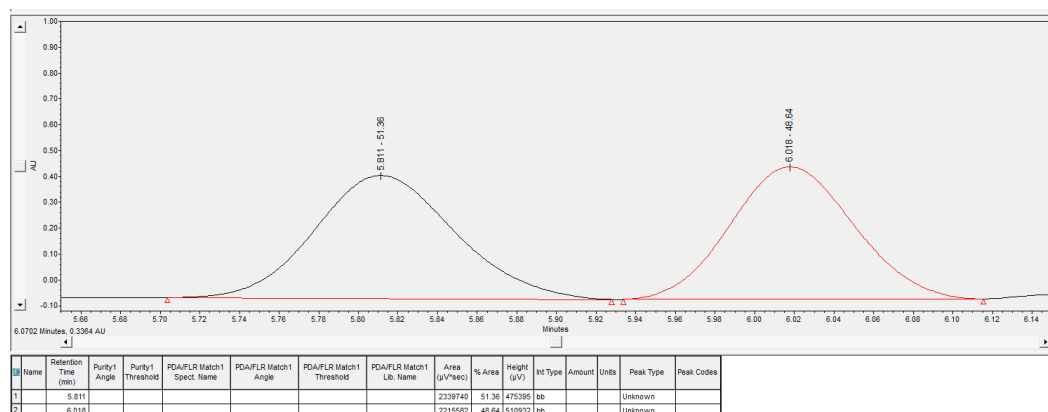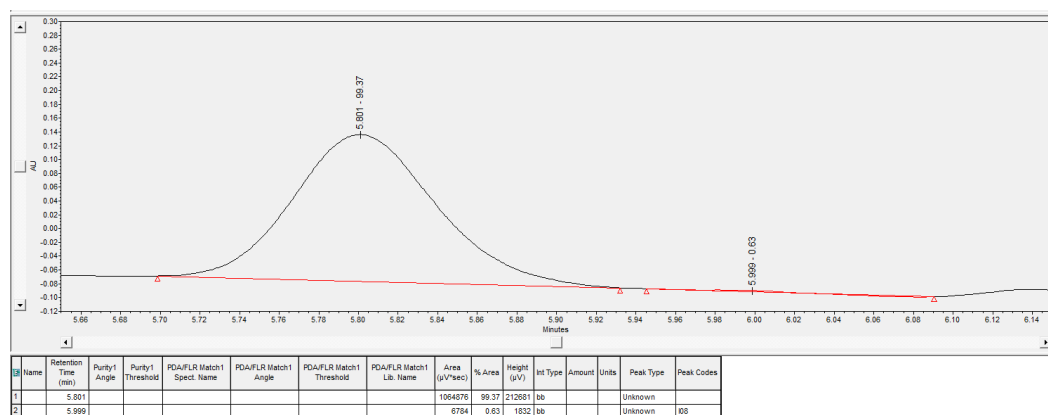

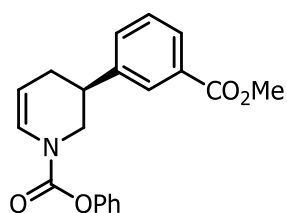

### Phenyl-(S)-3-(3-(methoxycarbonyl)phenyl)-3,4-dihydropyridine-1(2H)-

**carboxylate (3x):** The corresponding compound was prepared following general procedure **A** using 3-(methoxycarbonyl)phenyl boronic acid and phenyl pyridine-1(2H)-carboxylate. The mixture was stirred at 70 °C for 20 hours. Purification by flash chromatography (2% acetone/petrol to 20% acetone/petrol) afforded compound **3x** as viscous liquid (50% yield, 96% ee).

**<sup>1</sup>H NMR** (500 MHz, CDCl<sub>3</sub>) (2 rotamers): δ (ppm) 8.00 – 7.89 (m, 2H), 7.50 – 7.32 (m, 4H), 7.26 – 7.00 (m, 4H), 5.26 – 5.11 (m, 1H), 4.35 – 4.25 (m, 1H), 3.96 – 3.87 (m, 3H), 3.58 – 3.31 (m, 1H), 3.23 – 3.10 (m, 1H), 2.45 – 2.32 (m, 2H). **<sup>13</sup>C NMR** (126 MHz, CDCl<sub>3</sub>) (2 rotamers): δ (ppm) 167.1, 152.1, 151.8, 151.2, 151.0, 143.2, 143.0, 132.0, 130.8, 130.7, 129.51, 129.5, 129.0, 128.9, 128.5, 128.43, 128.42, 128.40, 125.8, 125.4, 125.1, 121.8, 121.7, 107.6, 107.2, 52.3, 48.3, 47.7, 38.6, 38.4, 29.3, 29.2.

**HRMS** (ESI): m/z calcd for C<sub>20</sub>H<sub>20</sub>O<sub>4</sub>N<sup>+</sup> [M + H]<sup>+</sup> 338.1387 found 338.1390.

**IR** (ν<sub>max</sub>/cm<sup>-1</sup>) 1721, 1406, 1361, 1290, 1254, 1202, 752, 690.

**SFC Conditions:** Chiralpak IF; Gradient 1; 98:2 er (major enantiomer t<sub>R</sub> = 5.77 min; minor enantiomer t<sub>R</sub> = 5.97 min), **96% ee**. [α]<sub>D</sub><sup>25</sup> = -44.3 (c = 2.0, CHCl<sub>3</sub>).

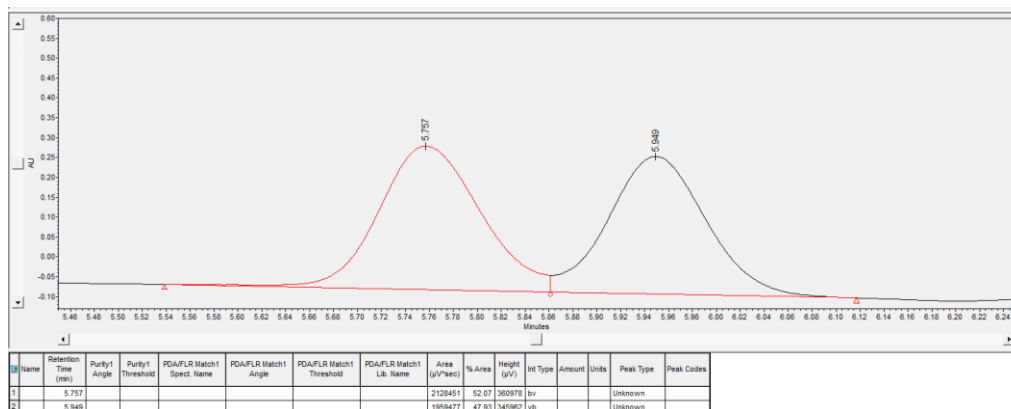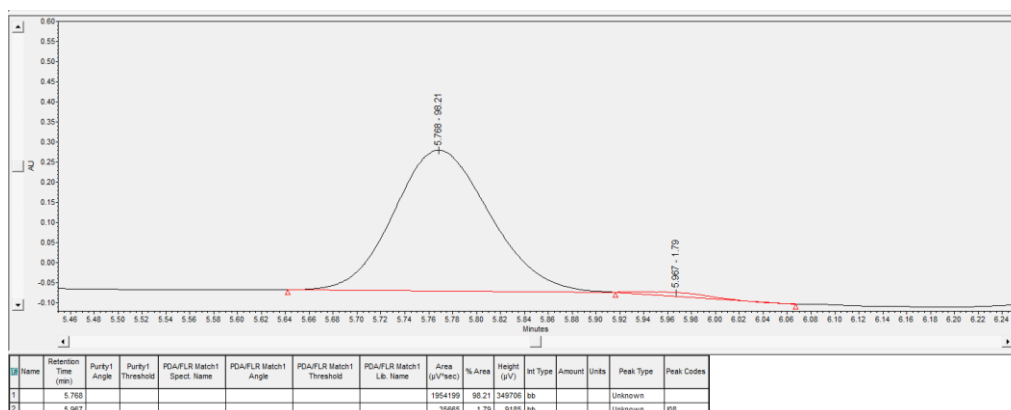

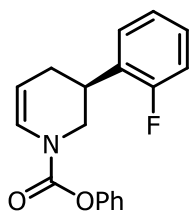

**Phenyl-(S)-3-(2-fluorophenyl)-3,4-dihydropyridine-1(2H)-carboxylate (3y):** The corresponding compound was prepared following general procedure **A** using 2-fluoro phenyl boronic acid and phenyl pyridine-1(2H)-carboxylate. The mixture was stirred at 70 °C for 20 hours. Purification by flash chromatography (2% acetone/petrol to 15% acetone/petrol) afforded compound **3y** as viscous liquid (25% yield, 99% ee).

**<sup>1</sup>H NMR** (500 MHz, CDCl<sub>3</sub>) (2 rotamers): δ (ppm) <sup>1</sup>H NMR (500 MHz, CDCl<sub>3</sub>) δ 7.42 – 7.28 (m, 4H), 7.25 – 6.93 (m, 9H), 5.30 – 5.05 (m, 1H), 4.30 (t, *J* = 12.4 Hz, 1H), 3.60 – 3.24 (m, 1H), 3.12 (dtt, *J* = 15.0, 10.5, 4.6 Hz, 1H), 2.45 – 2.27 (m, 3H). **<sup>13</sup>C NMR** (101 MHz, CDCl<sub>3</sub>) (2 rotamers): δ (ppm) <sup>13</sup>C NMR (126 MHz, CDCl<sub>3</sub>) δ 163.18, 151.75, 151.18, 151.00, 145.36, 145.26, 130.35, 130.29, 129.50, 129.46, 125.76, 125.40, 125.05, 123.03, 121.77, 121.67, 114.29, 114.22, 114.03, 113.98, 107.46, 107.09, 48.28, 47.67, 38.45, 38.33, 29.29, 29.15. **<sup>19</sup>F NMR** (471 MHz, CDCl<sub>3</sub>) (2 rotamers): δ (ppm) –112.7, –112.8.

**HRMS** (ESI): *m/z* calcd for C<sub>20</sub>H<sub>20</sub>O<sub>4</sub>N<sup>+</sup> [M + H]<sup>+</sup> 338.1387 found 338.1390.

**IR** (ν<sub>max</sub>/cm<sup>-1</sup>) 1723, 1493, 1407, 1363, 1257, 1204, 755, 689.

**SFC Conditions:** Chiralpak IF; Gradient 1; 99.5:0.5 er (major enantiomer *t<sub>R</sub>* = 3.57 min; minor enantiomer *t<sub>R</sub>* = 3.71 min), **99% ee**. [α]<sup>25</sup><sub>D</sub> = –46.2 (c = 2.0, CHCl<sub>3</sub>).

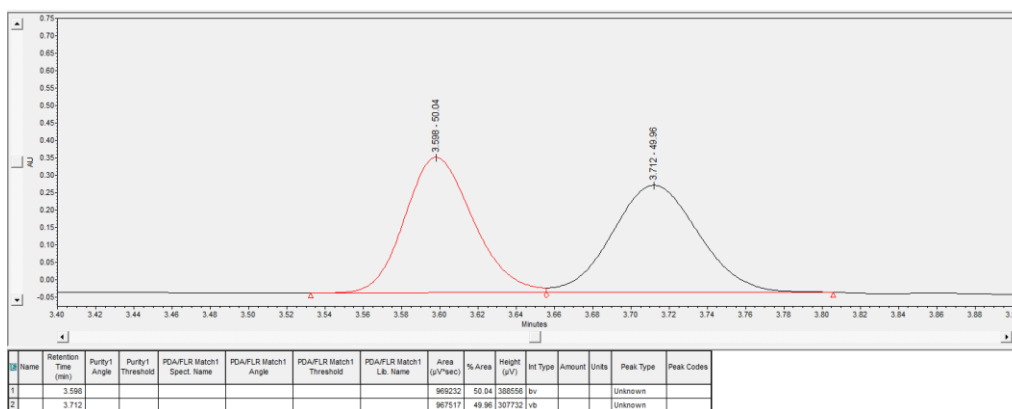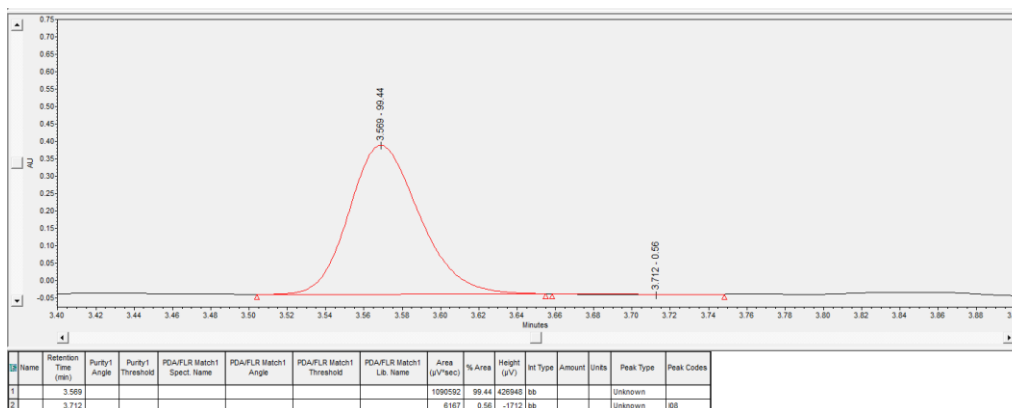

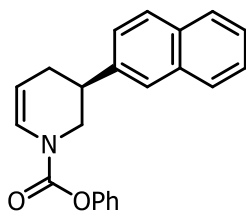

**Phenyl-(S)-3-(naphthalen-2-yl)-3,4-dihydropyridine-1(2H)-carboxylate (3z):** The corresponding compound was prepared following general procedure **A** using naphthalen-2-yl boronic acid and phenyl pyridine-1(2H)-carboxylate. The mixture was stirred at 70 °C for 20 hours. Purification by flash chromatography (2% acetone/petrol to 25% acetone/petrol) afforded compound **3z** as viscous liquid (79% yield, 96% ee).

**<sup>1</sup>H NMR** (400 MHz, CDCl<sub>3</sub>) (2 rotamers): δ (ppm) 7.90 – 7.64 (m, 4H), 7.54 – 7.44 (m, 2H), 7.44 – 7.33 (m, 3H), 7.29 – 7.03 (m, 4H), 5.32 – 5.15 (m, 1H), 4.41 (ddd, *J* = 12.1, 7.5, 3.7 Hz, 1H), 3.67 – 3.39 (m, 1H), 3.29 (ttt, *J* = 11.3, 7.5, 3.7 Hz, 1H), 2.48 (ddd, *J* = 8.5, 3.7, 2.0 Hz, 2H). **<sup>13</sup>C NMR** (101 MHz, CDCl<sub>3</sub>) (2 rotamers): δ (ppm) 152.1, 151.8, 151.2, 151.1, 140.2, 140.1, 133.7, 132.6, 129.5, 129.4, 128.6, 128.5, 127.8, 127.8, 127.76, 126.4, 126.3, 125.9, 125.85, 125.83, 125.81, 125.7, 125.68, 125.6, 125.4, 125.0, 121.8, 121.7, 107.9, 107.5, 48.5, 47.9, 38.8, 38.7, 29.4, 29.3.

**HRMS** (ESI): *m/z* calcd for C<sub>22</sub>H<sub>20</sub>O<sub>2</sub>N<sup>+</sup> [M + H]<sup>+</sup> 330.1489 found 330.1493.

**IR** (ν<sub>max</sub>/cm<sup>-1</sup>) 1721, 1406, 1368, 1351, 1202, 1075, 975, 854, 818, 748, 720, 689.

**SFC Conditions:** Chiralpak IE; Gradient 1; 98:2 er (major enantiomer *t<sub>R</sub>* = 6.12 min; minor enantiomer *t<sub>R</sub>* = 6.00 min), **96% ee**. [α]<sub>D</sub><sup>25</sup> = -89.3 (c = 2.0, CHCl<sub>3</sub>).

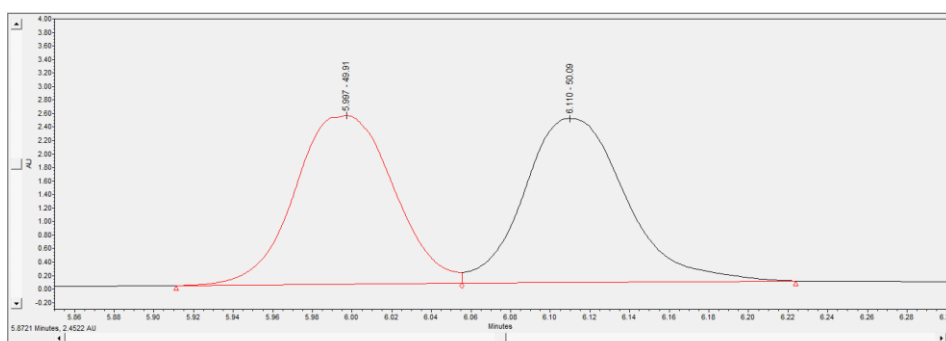

| Peak | Retention Time (min) | Purity1 Angle | Purity1 Threshold | FDA/FLR Match1 Spect. Name | FDA/FLR Match1 Angle | FDA/FLR Match1 Threshold | FDA/FLR Match1 Lib. Name | Area (μV*sec) | % Area  | Height (μV) | Int. Type | Amount | Units | Peak Type | Peak Codes |
|------|----------------------|---------------|-------------------|----------------------------|----------------------|--------------------------|--------------------------|---------------|---------|-------------|-----------|--------|-------|-----------|------------|
| 1    | 5.997                |               |                   |                            |                      |                          | 9839939                  | 49.91         | 2499721 | bv          |           |        |       | Unknown   |            |
| 2    | 6.110                |               |                   |                            |                      |                          | 9870501                  | 50.09         | 2430919 | vb          |           |        |       | Unknown   |            |

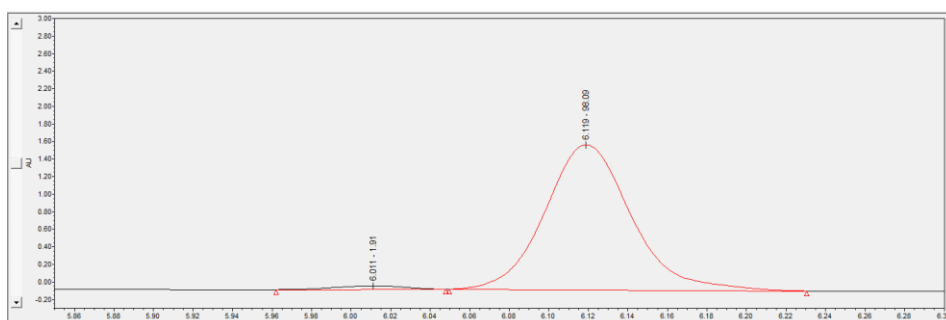

| Peak | Retention Time (min) | Purity1 Angle | Purity1 Threshold | FDA/FLR Match1 Spect. Name | FDA/FLR Match1 Angle | FDA/FLR Match1 Threshold | FDA/FLR Match1 Lib. Name | Area (μV*sec) | % Area  | Height (μV) | Int. Type | Amount | Units | Peak Type | Peak Codes |
|------|----------------------|---------------|-------------------|----------------------------|----------------------|--------------------------|--------------------------|---------------|---------|-------------|-----------|--------|-------|-----------|------------|
| 1    | 6.011                |               |                   |                            |                      |                          | 97930                    | 1.91          | 45582   | bb          |           |        |       | Unknown   |            |
| 2    | 6.119                |               |                   |                            |                      |                          | 5016185                  | 50.09         | 1652353 | bb          |           |        |       | Unknown   |            |



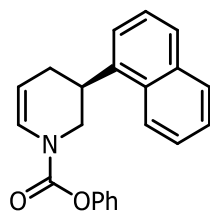

**Phenyl-(S)-3-(naphthalen-1-yl)-3,4-dihydropyridine-1(2H)-carboxylate (3aa):**

The corresponding compound was prepared following general procedure **A** using naphthalen-1-yl boronic acid and phenyl pyridine-1(2H)-carboxylate. The mixture was stirred at 70 °C for 20 hours. Purification by flash chromatography (2% acetone/petrol to 25% acetone/petrol) afforded compound **3aa** as viscous liquid (41% yield, 99% ee).

**<sup>1</sup>H NMR** (500 MHz, CDCl<sub>3</sub>) (2 rotamers): δ (ppm) 8.18 (dd, *J* = 16.9, 8.5 Hz, 1H), 7.91 (t, *J* = 8.2 Hz, 1H), 7.83 – 7.77 (m, 1H), 7.63 – 7.46 (m, 3H), 7.38 (dq, *J* = 16.2, 8.2 Hz, 3H), 7.26 – 7.14 (m, 3H), 7.10 (t, *J* = 7.4 Hz, 1H), 5.38 – 5.15 (m, 1H), 4.50 (t, *J* = 9.1 Hz, 1H), 3.96 (ddt, *J* = 16.1, 9.9, 5.9 Hz, 1H), 3.74 – 3.39 (m, 1H), 2.60 – 2.44 (m, 2H). **<sup>13</sup>C NMR** (126 MHz, CDCl<sub>3</sub>) (2 rotamers): δ (ppm) 152.1, 151.7, 151.2, 151.1, 138.7, 138.6, 134.1, 134.0, 131.5, 131.48, 129.5, 129.4, 129.3, 129.2, 127.6, 127.6, 126.5, 126.46, 125.8, 125.79, 125.7, 125.67, 125.4, 125.0, 123.2, 123.1, 122.9, 122.8, 121.8, 121.7, 108.3, 107.8, 48.4, 47.8, 33.5, 33.4, 29.6, 29.4.

**HRMS** (ESI): *m/z* calcd for C<sub>22</sub>H<sub>20</sub>O<sub>2</sub>N<sup>+</sup> [M + H]<sup>+</sup> 330.1489 found 330.1487.

**IR** (ν<sub>max</sub>/cm<sup>-1</sup>) 1723, 1406, 1369, 1260, 1235, 1204, 798, 749, 689.

**SFC Conditions:** Chiralpak ID; Gradient 1; 99.5:0.5 er (major enantiomer *t<sub>R</sub>* = 4.51 min; minor enantiomer *t<sub>R</sub>* = 4.22 min), **99% ee**. [α]<sub>D</sub><sup>25</sup> = -100.1 (c = 2.0, CHCl<sub>3</sub>).

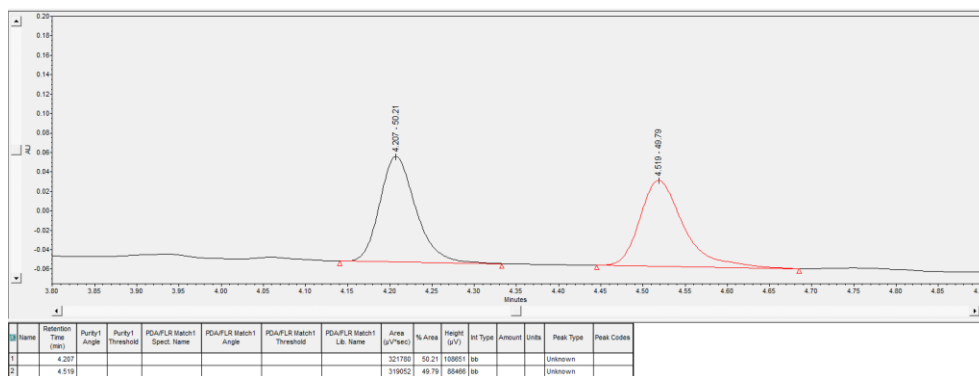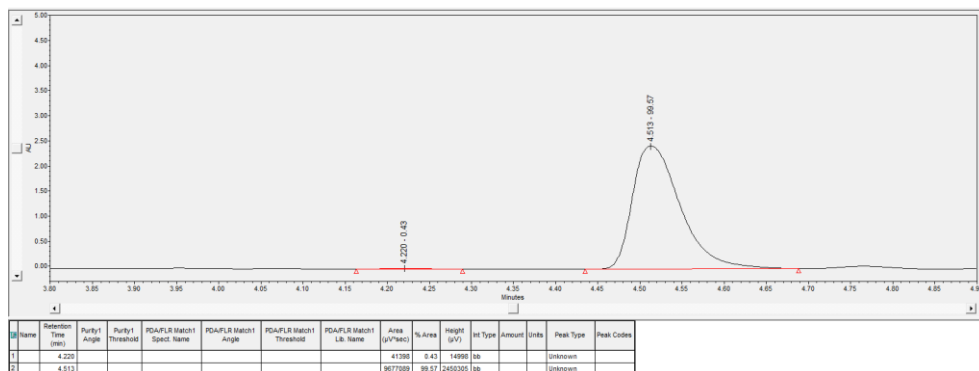

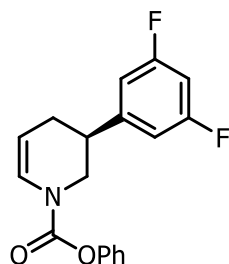

**Phenyl-(S)-3-(3,5-difluorophenyl)-3,4-dihydropyridine-1(2H)-carboxylate (3ab):**

The corresponding compound was prepared following general procedure **A** using 3,5-difluorophenyl boronic acid and phenyl pyridine-1(2H)-carboxylate. The mixture was stirred at 70 °C for 20 hours. Purification by flash chromatography (2% acetone/petrol to 25% acetone/petrol) afforded compound **3ab** as viscous liquid (70% yield, 94% ee).

**<sup>1</sup>H NMR** (500 MHz, CDCl<sub>3</sub>) (2 rotamers): δ (ppm) 7.37 (q, *J* = 8.0 Hz, 2H), 7.26 – 6.99 (m, 4H), 6.85 – 6.65 (m, 3H), 5.26 – 5.08 (m, 1H), 4.33 – 4.21 (m, 1H), 3.55 – 3.24 (m, 1H), 3.11 (ddt, *J* = 14.5, 9.5, 5.1 Hz, 1H), 2.46 – 2.20 (m, 2H). **<sup>13</sup>C NMR** (126 MHz, CDCl<sub>3</sub>) (<sup>19</sup>F decoupled) (2 rotamers): δ (ppm) 163.4, 163.3, 152.0, 151.7, 151.1, 150.9, 146.7, 146.6, 129.53, 129.5, 125.8, 125.5, 125.2, 121.8, 121.7, 110.3, 110.27, 107.1, 106.7, 102.6, 102.58, 48.0, 47.4, 38.5, 38.3, 29.1, 29.0. **<sup>19</sup>F NMR** (471 MHz, CDCl<sub>3</sub>) (2 rotamers): δ (ppm) –109.4, –109.5.

**HRMS** (ESI): *m/z* calcd for C<sub>18</sub>H<sub>15</sub>O<sub>2</sub>F<sub>2</sub>N<sup>+</sup> [M + H]<sup>+</sup> 338.0963 found 338.0976.

**IR** (ν<sub>max</sub>/cm<sup>-1</sup>) 1722, 1625, 1598, 1408, 1379, 1345, 1204, 1118, 982, 851, 750, 690.

**SFC Conditions:** Chiralpak IC; Gradient 1; 97:3 er (major enantiomer *t<sub>R</sub>* = 3.26 min; minor enantiomer *t<sub>R</sub>* = 3.40 min), **94% ee**. [α]<sub>D</sub><sup>25</sup> = –51.2 (c = 2.0, CHCl<sub>3</sub>).

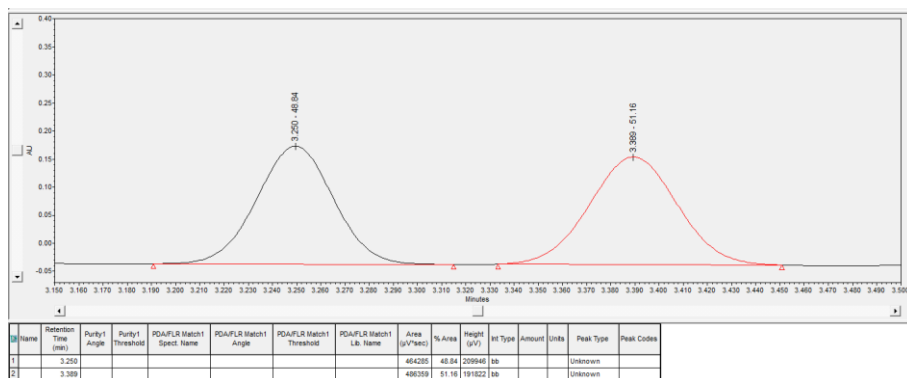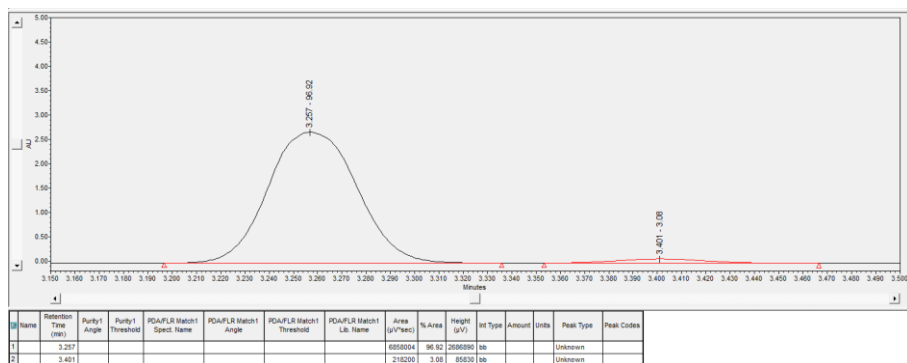

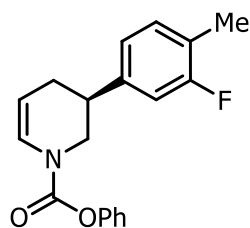

### Phenyl-(S)-3-(3-fluoro-4-methylphenyl)-3,4-dihydropyridine-1(2H)-carboxylate

**(3ac):** The corresponding compound was prepared following general procedure **A** using 3-fluoro-4-methylphenyl boronic acid and phenyl pyridine-1(2H)-carboxylate. The mixture was stirred at 70 °C for 20 hours. Purification by flash chromatography (2% acetone/petrol to 25% acetone/petrol) afforded compound **3ac** as viscous liquid (50% yield, 99% ee).

**<sup>1</sup>H NMR** (CDCl<sub>3</sub>, 400 MHz) (2 rotamers): δ (ppm) 7.37 (q, *J* = 8.1 Hz, 2H), 7.24 – 6.95 (m, 7H), 5.25 – 5.09 (m, 1H), 4.32 – 4.20 (m, 1H), 3.49 – 3.19 (m, 1H), 3.05 (tp, *J* = 10.8, 5.5 Hz, 1H), 2.37 – 2.23 (m, 5H). **<sup>13</sup>C NMR** (126 MHz, CDCl<sub>3</sub>) (2 rotamers): δ (ppm) 160.4, 152.1, 151.8, 151.2, 151.0, 138.2, 138.1, 130.3, 129.5, 129.46, 126.0, 125.9, 125.74, 125.7, 125.3, 125.2, 125.1, 124.9, 121.8, 121.7, 115.3, 115.2, 107.7, 107.4, 48.7, 48.1, 38.0, 37.9, 29.6, 29.5, 14.8. **<sup>19</sup>F NMR** (471 MHz, CDCl<sub>3</sub>) (2 rotamers): δ (ppm) –120.09, –120.24.

**HRMS** (ESI): *m/z* calcd for C<sub>18</sub>H<sub>15</sub>O<sub>2</sub>F<sub>2</sub>N<sup>+</sup> [M + H]<sup>+</sup> 316.1144 found 316.1168.

**IR** (ν<sub>max</sub>/cm<sup>-1</sup>) 1723, 1504, 1406, 1359, 1251, 1202, 866, 819, 750, 721, 689.

**SFC Conditions:** Chiralpak IA; Gradient 3; 99.5:0.5 er (major enantiomer *t<sub>R</sub>* = 6.30 min; minor enantiomer *t<sub>R</sub>* = 6.16 min), **99% ee**. [α]<sub>D</sub><sup>25</sup> = –50.8 (c = 2.0, CHCl<sub>3</sub>).

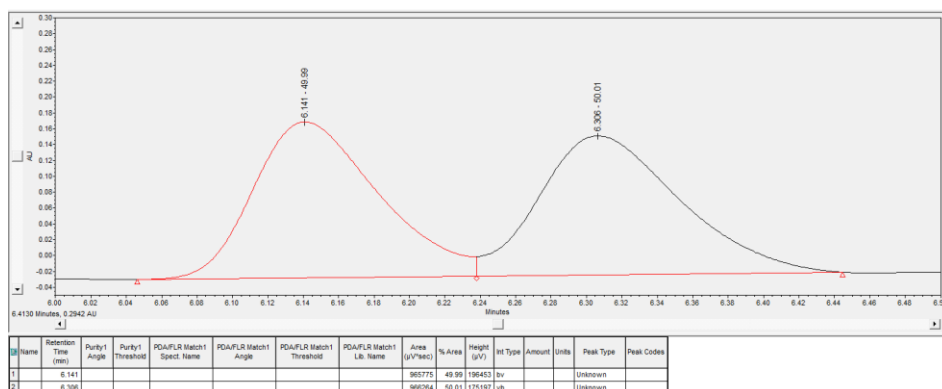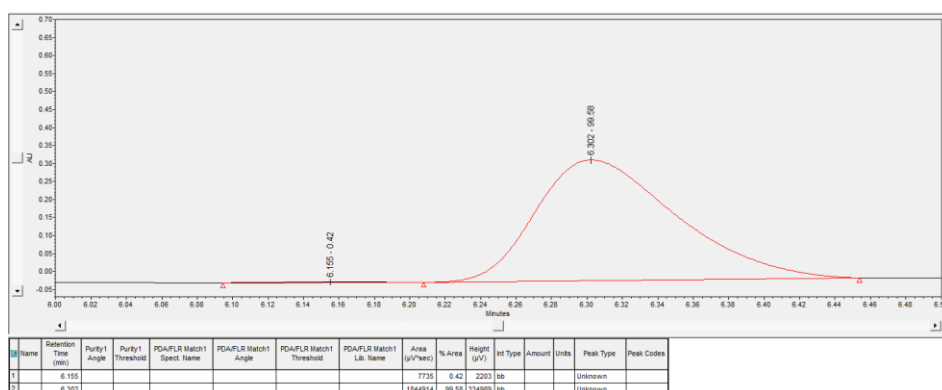

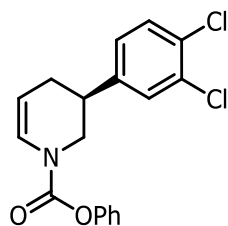

### Phenyl-(S)-3-(3,4-dichlorophenyl)-3,4-dihydropyridine-1(2H)-carboxylate (**3ad**):

The corresponding compound was prepared following general procedure **A** using 3,4-dichlorophenyl boronic acid and phenyl pyridine-1(2H)-carboxylate. The mixture was stirred at 70 °C for 20 hours. Purification by flash chromatography (2% acetone/petrol to 20% acetone/petrol) afforded compound **3ad** as viscous liquid (60% yield, 96% ee).

**<sup>1</sup>H NMR** (CDCl<sub>3</sub>, 400 MHz) (2 rotamers): δ (ppm) 7.46 – 7.32 (m, 4H), 7.25 – 6.99 (m, 5H), 5.23 – 5.10 (m, 1H), 4.32 – 4.19 (m, 1H), 3.55 – 3.27 (m, 1H), 3.07 (dp, *J* = 14.0, 4.9 Hz, 1H), 2.47 – 2.21 (m, 2H). **<sup>13</sup>C NMR** (101 MHz, CDCl<sub>3</sub>) (2 rotamers): δ (ppm) 151.9, 151.7, 151.1, 150.9, 143.0, 142.9, 132.9, 132.8, 131.1, 131.05, 130.8, 130.7, 129.5, 129.46, 129.4, 129.3, 126.8, 125.8, 125.5, 125.1, 121.7, 121.6, 107.1, 106.8, 48.1, 47.4, 37.9, 37.8, 29.1, 29.0.

**HRMS** (ESI): *m/z* calcd for C<sub>22</sub>H<sub>20</sub>O<sub>2</sub>N<sup>+</sup> [M + H]<sup>+</sup> 348.0553 found 348.0561.

**IR** (ν<sub>max</sub>/cm<sup>-1</sup>) 1724, 1407, 1374, 1357, 1255, 1202, 749, 689.

**SFC Conditions:** Chiralpak ID; Gradient 1; 98:2 er (major enantiomer *t<sub>R</sub>* = 4.14 min; minor enantiomer *t<sub>R</sub>* = 4.28 min), **96% ee**. [α]<sub>D</sub><sup>25</sup> = -50.9 (c = 2.0, CHCl<sub>3</sub>).

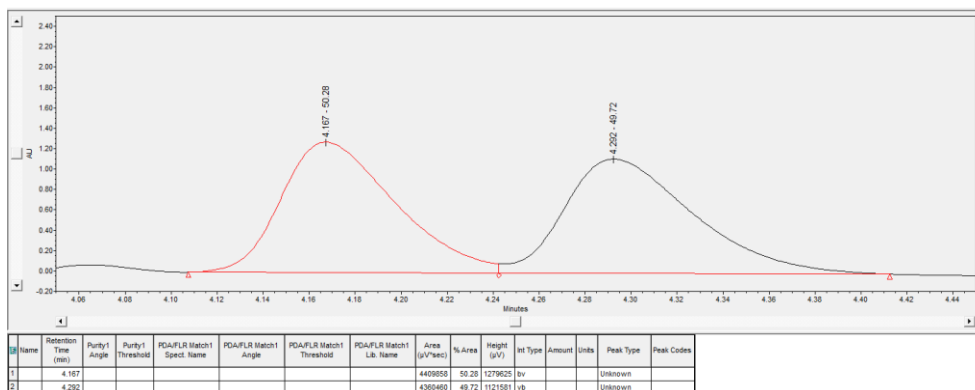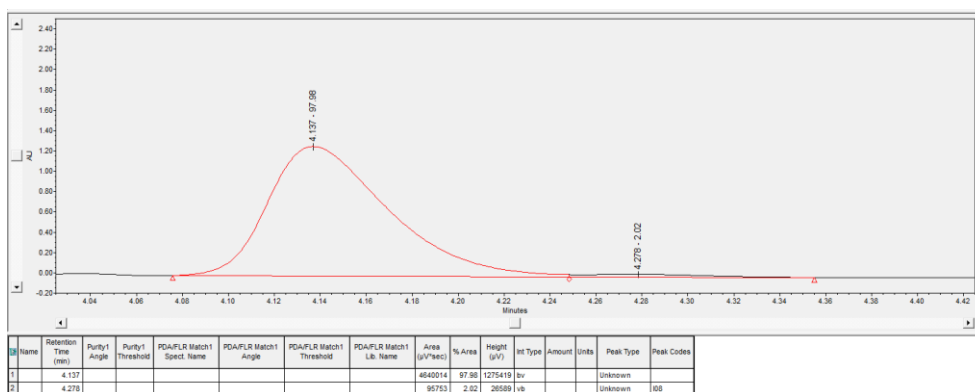

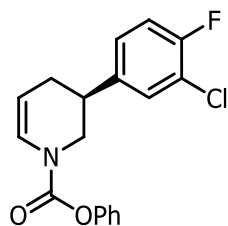

### Phenyl-(S)-3-(3-chloro-4-fluorophenyl)-3,4-dihydropyridine-1(2H)-carboxylate

**(3ae):** The corresponding compound was prepared following general procedure **A** using 3-chloro-4-fluorophenyl boronic acid and phenyl pyridine-1(2H)-carboxylate. The mixture was stirred at 70 °C for 20 hours. Purification by flash chromatography (2% acetone/petrol to 25% acetone/petrol) afforded compound **3ae** as viscous liquid (50% yield, 97% ee).

**<sup>1</sup>H NMR** (CDCl<sub>3</sub>, 400 MHz) (2 rotamers): δ (ppm) 7.42 – 7.27 (m, 2H), 7.25 – 6.99 (m, 7H), 5.24 – 5.09 (m, 1H), 4.32 – 4.19 (m, 1H), 3.52 – 3.23 (m, 1H), 3.08 (qt, *J* = 10.6, 5.2 Hz, 1H), 2.44 – 2.22 (m, 2H). **<sup>13</sup>C NMR** (101 MHz, CDCl<sub>3</sub>) (2 rotamers): δ (ppm) 158.44, 155.97, 152.00, 151.74, 151.14, 150.95, 139.84, 139.81, 139.74, 139.70, 129.52, 129.49, 129.47, 129.41, 127.05, 126.98, 125.80, 125.47, 125.13, 121.75, 121.66, 116.98, 116.78, 107.23, 106.89, 48.30, 47.69, 37.82, 37.70, 29.32, 29.22. **<sup>19</sup>F NMR** (471 MHz, CDCl<sub>3</sub>) (2 rotamers): δ (ppm) –117.9, –118.0.

**HRMS** (ESI): *m/z* calcd for C<sub>18</sub>H<sub>16</sub>O<sub>2</sub>FCIN<sup>+</sup> [M + H]<sup>+</sup> 332.0848 found 332.0851.

**IR** (ν<sub>max</sub>/cm<sup>-1</sup>) 1724, 1502, 1407, 1376, 1258, 1202, 860, 821, 751, 690.

**SFC Conditions:** Chiralpak ID; Gradient 1; 98.5:1.5 er (major enantiomer *t<sub>R</sub>* = 3.39 min; minor enantiomer *t<sub>R</sub>* = 3.48 min), **97% ee**. [α]<sub>D</sub><sup>25</sup> = –46.8 (c = 2.0, CHCl<sub>3</sub>).

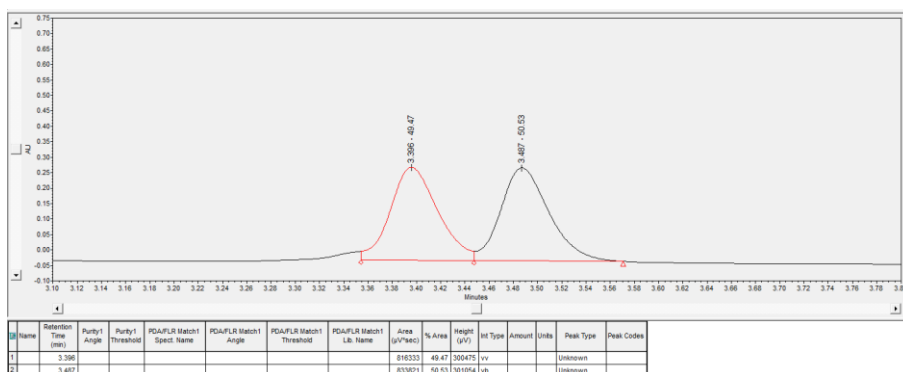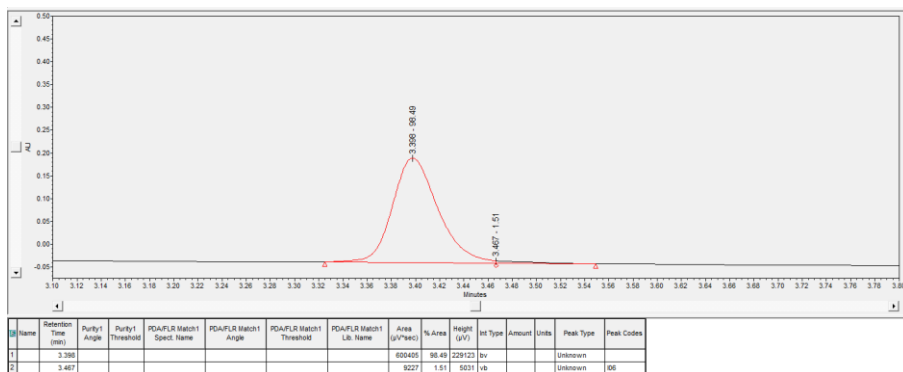

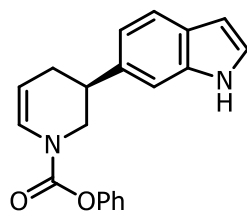

**Phenyl-(S)-3-(1H-indol-6-yl)-3,4-dihydropyridine-1(2H)-carboxylate (3af):** The corresponding compound was prepared following general procedure **A** using 1H-indol-6-yl boronic acid and phenyl pyridine-1(2H)-carboxylate. The mixture was stirred at 70 °C for 20 hours. Purification by flash chromatography (2% acetone/petrol to 25% acetone/petrol) afforded compound **3af** as viscous liquid (35% yield, 86% ee).

**<sup>1</sup>H NMR** (CDCl<sub>3</sub>, 500 MHz) (2 rotamers): δ (ppm) 8.22 (s, 1H), 7.63 (t, *J* = 7.8 Hz, 1H), 7.45 – 7.30 (m, 2H), 7.30 – 7.13 (m, 5H), 7.15 – 6.99 (m, 2H), 6.53 (s, 1H), 5.31 – 5.11 (m, 1H), 4.38 (dd, *J* = 12.5, 2.9 Hz, 1H), 3.60 – 3.31 (m, 1H), 3.21 (ddt, *J* = 17.6, 11.7, 6.0 Hz, 1H), 2.48 – 2.39 (m, 2H). **<sup>13</sup>C NMR** (126 MHz, CDCl<sub>3</sub>) (2 rotamers): δ (ppm) 152.3, 151.9, 151.3, 151.1, 136.7, 136.6, 136.22, 136.2, 129.5, 129.4, 127.05, 126.0, 125.7, 125.6, 125.2, 124.8, 124.6, 124.5, 121.8, 121.7, 121.03, 121.0, 119.6, 119.57, 109.51, 109.5, 108.3, 107.9, 102.51, 102.5, 49.1, 48.5, 39.0, 38.8, 30.0, 29.8.

**HRMS** (ESI): *m/z* calcd for C<sub>20</sub>H<sub>19</sub>O<sub>2</sub>N<sub>2</sub><sup>+</sup> [M + H]<sup>+</sup> 319.1441 found 319.1435.

**IR** (ν<sub>max</sub>/cm<sup>-1</sup>) 3354, 1706, 1407, 1352, 1203, 1074, 873, 811, 753, 731, 689.

**SFC Conditions:** Chiralpak IB; Gradient 1; 93:7 er (major enantiomer *t<sub>R</sub>* = 6.42 min; minor enantiomer *t<sub>R</sub>* = 6.22 min), **86% ee**. [α]<sub>D</sub><sup>25</sup> = -76.8 (*c* = 2.0, CHCl<sub>3</sub>).

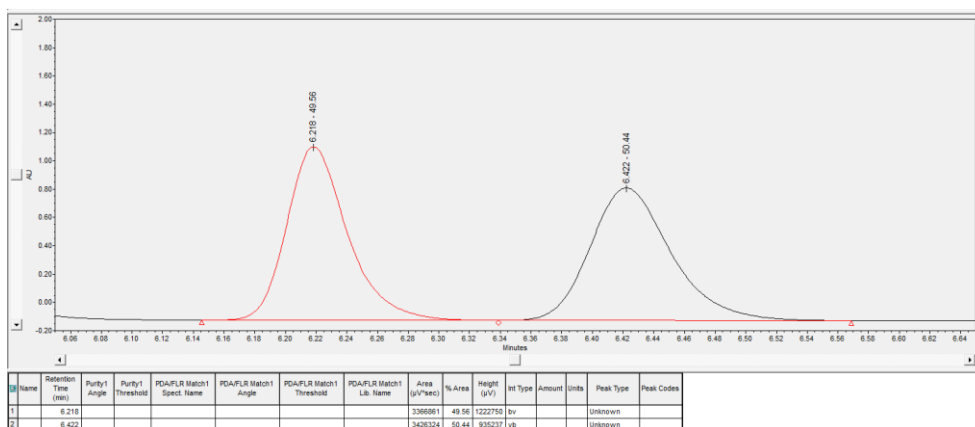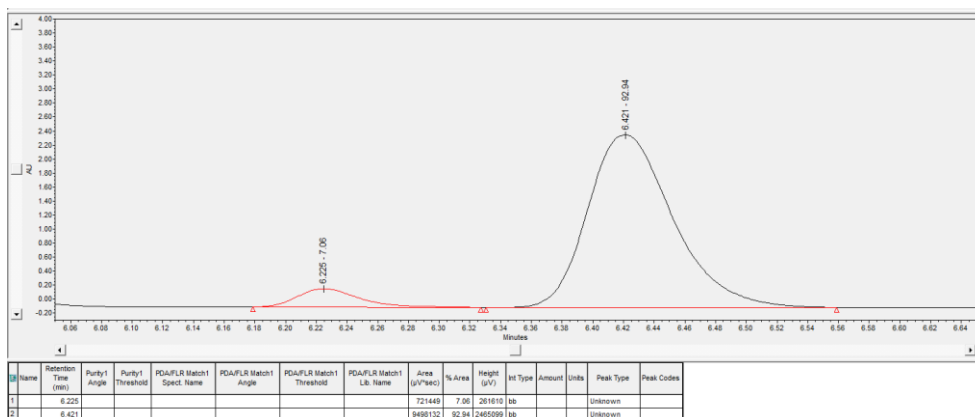

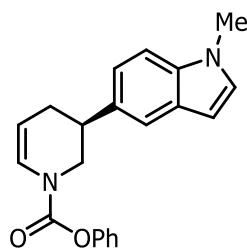

### Phenyl-(S)-3-(1-methyl-1H-indol-5-yl)-3,4-dihydropyridine-1(2H)-carboxylate

**(3ag):** The corresponding compound was prepared following general procedure **A** using 1-methyl-1H-indol-5-yl boronic acid and phenyl pyridine-1(2H)-carboxylate. The mixture was stirred at 70 °C for 20 hours. Purification by flash chromatography (2% acetone/petrol to 25% acetone/petrol) afforded compound **3ag** as viscous liquid (43% yield, 98% ee).

**<sup>1</sup>H NMR** (CDCl<sub>3</sub>, 400 MHz) (2 rotamers): δ (ppm) 7.64 – 7.52 (m, 1H), 7.47 – 7.30 (m, 3H), 7.30 – 7.04 (m, 6H), 6.51 (t, *J* = 3.0 Hz, 1H), 5.35 – 5.16 (m, 1H), 4.42 (td, *J* = 12.9, 3.6 Hz, 1H), 3.82 – 3.71 (m, 3H), 3.64 – 3.34 (m, 1H), 3.24 (ddt, *J* = 15.6, 11.6, 5.7 Hz, 1H), 2.47 (dt, *J* = 9.2, 3.0 Hz, 2H). **<sup>13</sup>C NMR** (101 MHz, CDCl<sub>3</sub>) (2 rotamers): δ (ppm) 156.1, 152.2, 151.8, 151.3, 151.1, 136.0, 135.97, 133.7, 133.6, 129.4, 129.38, 125.64, 125.6, 125.1, 124.8, 121.8, 121.7, 121.2, 121.15, 119.05, 119.0, 115.4, 109.6, 109.5, 108.4, 108.0, 100.8, 49.3, 48.7, 38.8, 38.6, 32.9, 30.1, 30.0.

**HRMS** (ESI): *m/z* calcd for C<sub>21</sub>H<sub>20</sub>O<sub>2</sub>N<sub>2</sub><sup>+</sup> [M + H]<sup>+</sup> 333.1598 found 333.1603.

**IR** (ν<sub>max</sub>/cm<sup>-1</sup>) 1720, 1494, 1406, 1348, 1304, 1247, 1203, 1074, 750, 722, 690.

**SFC Conditions:** Chiralpak IB; Gradient 2; 99:1 er (major enantiomer *t<sub>R</sub>* = 3.56 min; minor enantiomer *t<sub>R</sub>* = 3.11 min), **98% ee**. [α]<sub>D</sub><sup>25</sup> = -68.2 (c = 2.0, CHCl<sub>3</sub>).

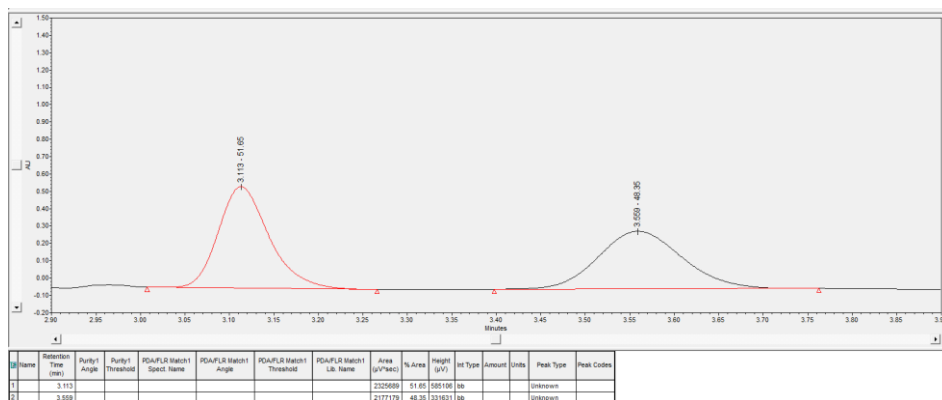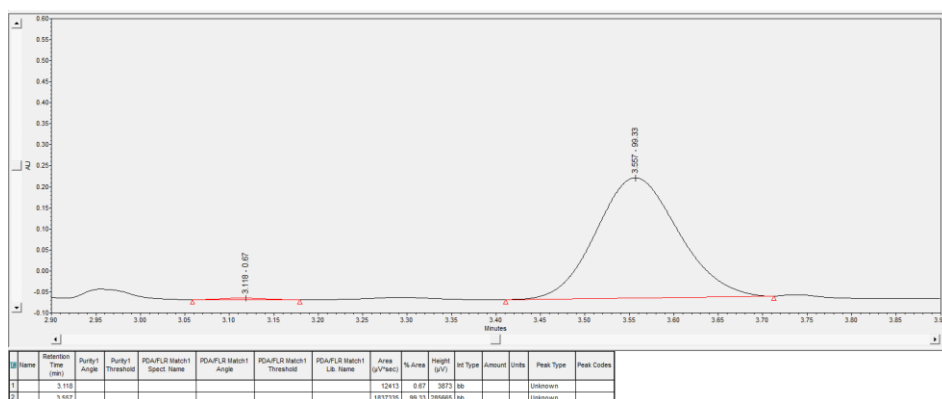

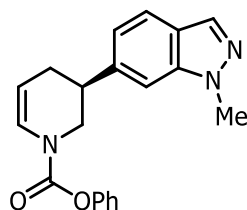

### Phenyl-(S)-3-(1-methyl-1H-indazol-6-yl)-3,4-dihydropyridine-1(2H)-carboxylate

**(3ah):** The corresponding compound was prepared following general procedure **A** using 1-methyl-1H-indazol-6-yl boronic acid and phenyl pyridine-1(2H)-carboxylate. The mixture was stirred at 70 °C for 20 hours. Purification by flash chromatography (2% acetone/petrol to 25% acetone/petrol) afforded compound **3ah** as viscous liquid (81% yield, 99% ee).

**<sup>1</sup>H NMR** (CDCl<sub>3</sub>, 400 MHz) (2 rotamers): δ (ppm) 7.96 (d, *J* = 2.2 Hz, 1H), 7.75 – 7.65 (m, 1H), 7.44 – 7.30 (m, 1H), 7.35 – 7.01 (m, 6H), 5.32 – 5.12 (m, 1H), 4.38 (dt, *J* = 12.3, 4.6 Hz, 1H), 3.68 – 3.34 (m, 1H), 3.27 (pd, *J* = 11.1, 3.6 Hz, 1H), 2.52 – 2.40 (m, 2H). **<sup>13</sup>C NMR** (101 MHz, CDCl<sub>3</sub>) (2 rotamers): δ (ppm) 152.1, 151.8, 151.2, 151.0, 141.4, 141.3, 140.3, 132.7, 129.51, 129.5, 125.8, 125.7, 125.4, 125.0, 123.32, 123.3, 121.8, 121.6, 121.5, 121.48, 120.6, 107.8, 107.4, 107.1, 107.0, 48.7, 48.1, 39.2, 39.1, 35.6, 29.8, 29.6.

**HRMS** (ESI): *m/z* calcd for C<sub>20</sub>H<sub>20</sub>O<sub>2</sub>N<sub>3</sub><sup>+</sup> [M + H]<sup>+</sup> 334.1550 found 334.1577.

**IR** (ν<sub>max</sub>/cm<sup>-1</sup>) 1721, 1406, 1367, 1350, 1201, 1098, 973, 839, 750.

**SFC Conditions:** Chiralpak ID; Gradient 1; 99.5:0.5 er (major enantiomer *t<sub>R</sub>* = 5.86 min; minor enantiomer *t<sub>R</sub>* = 5.56 min), **99% ee**. [α]<sub>D</sub><sup>25</sup> = -63.8 (c = 2.0, CHCl<sub>3</sub>).

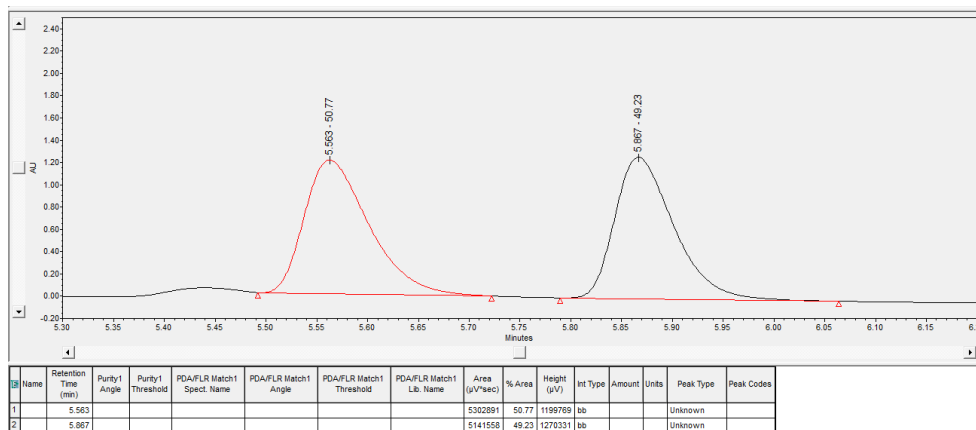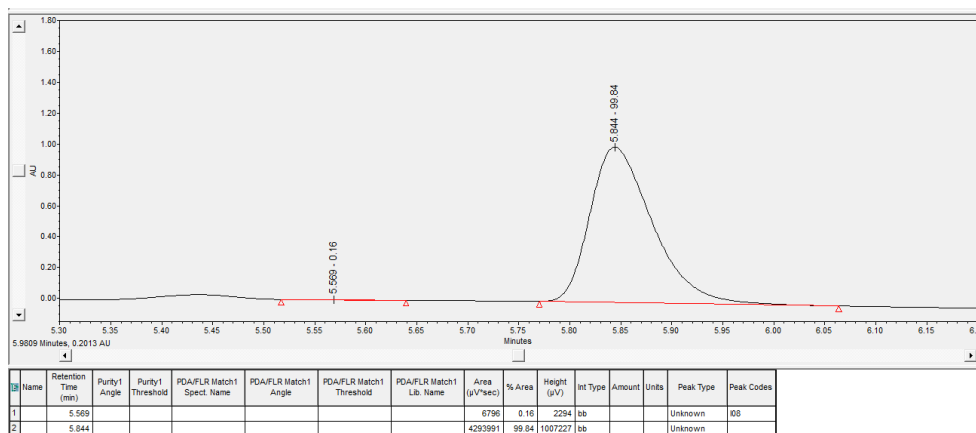



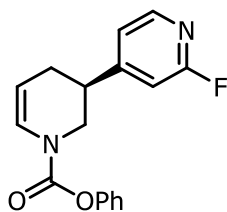

**Phenyl-(S)-2'-fluoro-3,4-dihydro-[3,4'-bipyridine]-1(2H)-carboxylate (3ai):** The corresponding compound was prepared following general procedure **A** using (6-fluoropyridin-4-yl) boronic acid and phenyl pyridine-1(2H)-carboxylate. The mixture was stirred at 70 °C for 20 hours. Purification by flash chromatography (2% acetone/petrol to 25% acetone/petrol) afforded compound **3ai** as viscous liquid (61% yield, 92% ee).

**<sup>1</sup>H NMR** (CDCl<sub>3</sub>, 500 MHz) (2 rotamers): δ (ppm) 8.19 (t, *J* = 5.7 Hz, 1H), 7.37 (q, *J* = 7.9 Hz, 2H), 7.22 (q, *J* = 7.2 Hz, 1H), 7.16 – 6.96 (m, 4H), 6.83 (d, *J* = 10.4 Hz, 1H), 5.27 – 5.04 (m, 1H), 4.36 – 4.13 (m, 1H), 3.65 – 3.30 (m, 1H), 3.18 (ddp, *J* = 14.6, 9.6, 5.0 Hz, 1H), 2.44 (dt, *J* = 17.5, 5.2 Hz, 1H), 2.37 – 2.27 (m, 1H). **<sup>13</sup>C NMR** (126 MHz, CDCl<sub>3</sub>) (2 rotamers): δ (ppm) 165.3, 163.32, 157.5, 157.4, 151.9, 151.7, 151.0, 150.8, 148.1, 148.0, 129.5, 125.9, 125.7, 125.4, 121.7, 121.6, 120.4, 108.3, 108.1, 106.7, 106.3, 47.3, 46.6, 37.9, 37.7, 28.4, 28.3. **<sup>19</sup>F NMR** (471 MHz, CDCl<sub>3</sub>) (2 rotamers): δ (ppm) –67.6, –67.8.

**HRMS** (ESI): *m/z* calcd for C<sub>17</sub>H<sub>16</sub>O<sub>2</sub>N<sub>2</sub><sup>+</sup> [M + H]<sup>+</sup> 299.1190 found 299.1194.

**IR** (ν<sub>max</sub>/cm<sup>-1</sup>) 1722, 1656, 1613, 1567, 1409, 1363, 1257, 1203, 1163, 1077, 751, 690.

**SFC Conditions:** Chiralpak IC; Gradient 1; 96:4 er (major enantiomer *t<sub>R</sub>* = 6.22 min; minor enantiomer *t<sub>R</sub>* = 6.46 min), **92% ee**. [α]<sub>D</sub><sup>25</sup> = –49.4 (*c* = 2.0, CHCl<sub>3</sub>).

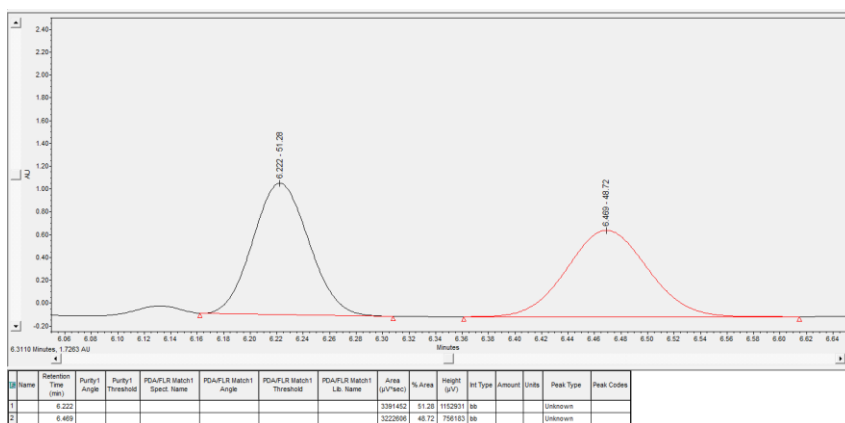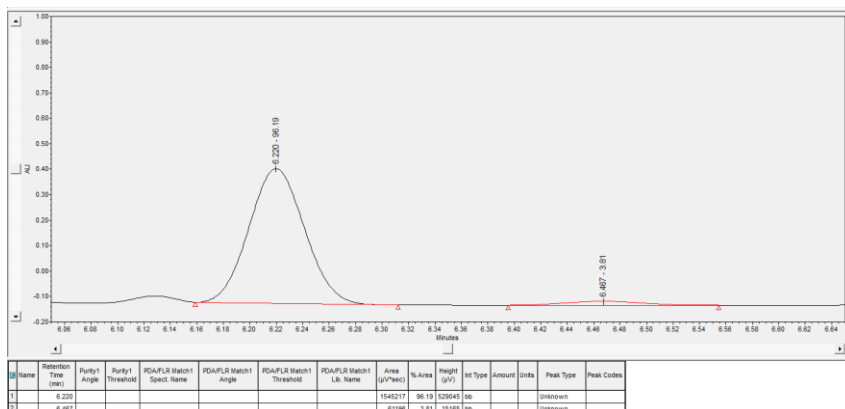

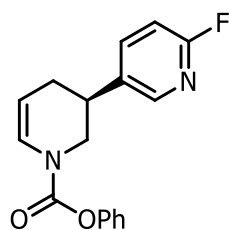

**Phenyl-(S)-6'-fluoro-3,4-dihydro-[3,3'-bipyridine]-1(2H)-carboxylate (3aj):** The corresponding compound was prepared following general procedure **A** using (6-fluoropyridin-3-yl) boronic acid and phenyl pyridine-1(2H)-carboxylate. The mixture was stirred at 70 °C for 20 hours. Purification by flash chromatography (2% acetone/petrol to 25% acetone/petrol) afforded compound **3ai** as viscous liquid (38% yield, 96% ee).

**<sup>1</sup>H NMR** (CDCl<sub>3</sub>, 500 MHz) (2 rotamers): δ (ppm) 8.15 (d, *J* = 11.9 Hz, 1H), 7.67 (qd, *J* = 9.4, 2.4 Hz, 1H), 7.37 (q, *J* = 8.6 Hz, 2H), 7.23 (t, *J* = 7.5 Hz, 1H), 7.17 – 7.01 (m, 3H), 6.94 (dt, *J* = 8.3, 3.9 Hz, 1H), 5.27 – 5.08 (m, 1H), 4.24 (t, *J* = 14.2 Hz, 1H), 3.69 – 3.32 (m, 1H), 3.18 (ddq, *J* = 15.3, 9.9, 4.8 Hz, 1H), 2.43 (dt, *J* = 17.5, 5.2 Hz, 1H), 2.31 (ddt, *J* = 17.5, 9.9, 2.5 Hz, 1H). **<sup>13</sup>C NMR** (126 MHz, CDCl<sub>3</sub>) (2 rotamers): δ (ppm) 151.8, 151.1, 150.9, 146.7, 146.6, 139.9, 139.87, 135.9, 135.7, 129.6, 129.5, 125.9, 125.7, 125.3, 121.7, 121.6, 109.8, 107.0, 106.6, 48.1, 47.5, 35.4, 29.2. **<sup>19</sup>F NMR** (471 MHz, CDCl<sub>3</sub>) (2 rotamers): δ (ppm) –70.2, –70.4.

**HRMS** (ESI): *m/z* calcd for C<sub>17</sub>H<sub>16</sub>O<sub>2</sub>N<sub>2</sub><sup>+</sup> [M + H]<sup>+</sup> 299.1190 found 299.1244.

**IR** (ν<sub>max</sub>/cm<sup>-1</sup>) 1727, 1657, 1598, 1489, 1409, 1376, 1255, 1205, 1078, 855, 751, 751, 690.

**SFC Conditions:** Chiralpak IB; Gradient 1; 98:2 er (major enantiomer *t<sub>R</sub>* = 4.22 min; minor enantiomer *t<sub>R</sub>* = 3.97 min), **96% ee**. [α]<sub>D</sub><sup>25</sup> = –46.3 (c = 2.0, CHCl<sub>3</sub>).

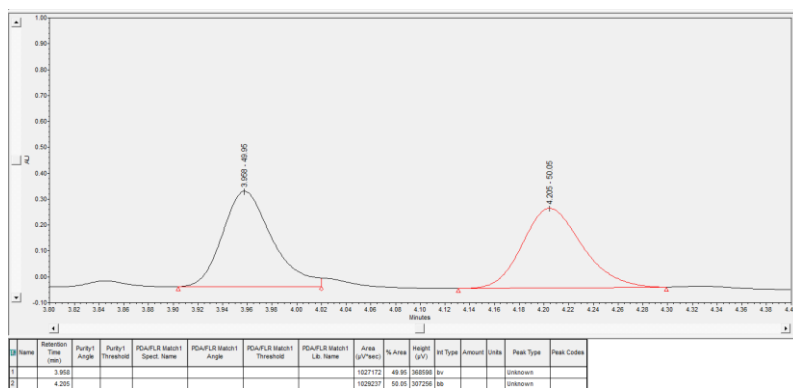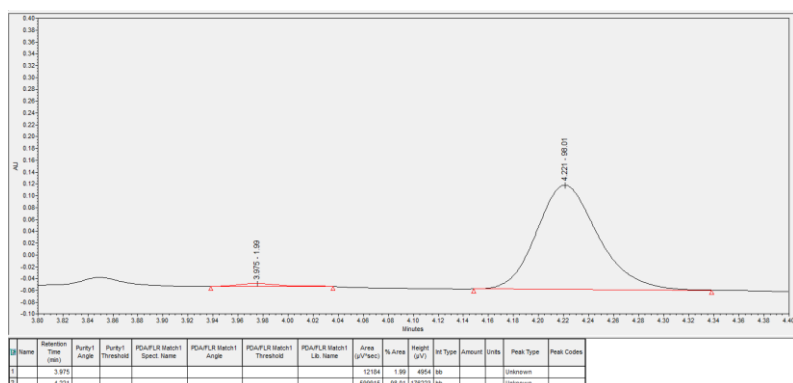

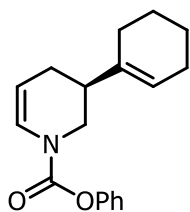

**Phenyl-(S)-3-(cyclohex-1-en-1-yl)-3,4-dihydropyridine-1(2H)-carboxylate (3ak):**

The corresponding compound was prepared following general procedure **A** using cyclohex-1-en-1-yl boronic acid and phenyl pyridine-1(2H)-carboxylate. The mixture was stirred at 70 °C for 20 hours. Purification by flash chromatography (100% petrol to 5% acetone/petrol) afforded compound **3ak** as viscous liquid (77% yield, 99% ee).

**<sup>1</sup>H NMR** (CDCl<sub>3</sub>, 400 MHz) (2 rotamers): δ (ppm) 7.37 (tt, *J* = 7.6, 2.2 Hz, 2H), 7.25 – 7.19 (m, 1H), 7.16 – 7.11 (m, 1H), 7.02 – 6.86 (m, 1H), 5.56 – 5.46 (m, 1H), 5.16 – 5.00 (m, 1H), 4.23 – 4.10 (m, 1H), 3.35 – 2.96 (m, 1H), 2.34 (ddd, *J* = 15.1, 8.8, 3.5 Hz, 1H), 2.24 – 1.85 (m, 6H), 1.72 – 1.52 (m, 4H). **<sup>13</sup>C NMR** (101 MHz, CDCl<sub>3</sub>) (2 rotamers): δ (ppm) 152.2, 151.8, 151.3, 151.2, 138.1, 138.0, 129.4, 125.6, 125.0, 124.6, 122.0, 121.9, 121.8, 108.0, 107.7, 47.0, 46.5, 39.64, 39.6, 29.8, 27.3, 27.1, 27.0, 25.3, 23.1, 22.6.

**HRMS** (ESI): *m/z* calcd for C<sub>18</sub>H<sub>21</sub>O<sub>2</sub>NNa<sup>+</sup> [M + Na]<sup>+</sup> 306.1465 found 306.1468.

**IR** (ν<sub>max</sub>/cm<sup>-1</sup>) 1726, 1656, 1407, 1361, 1252, 1205, 750, 689.

**SFC Conditions:** Chiralpak IF; Gradient 1; 99.5:0.5 er (major enantiomer *t<sub>R</sub>* = 3.94 min; minor enantiomer *t<sub>R</sub>* = 4.16 min), **99% ee**. [α]<sub>D</sub><sup>25</sup> = -48.8 (c = 2.0, CHCl<sub>3</sub>).

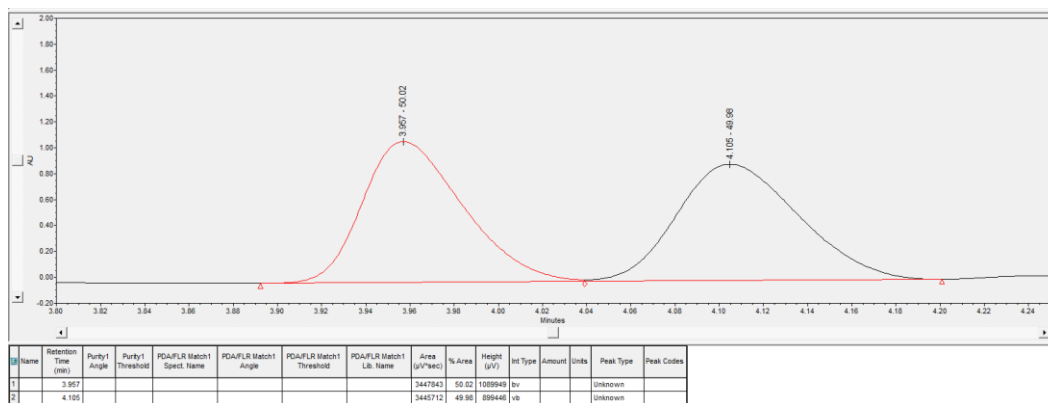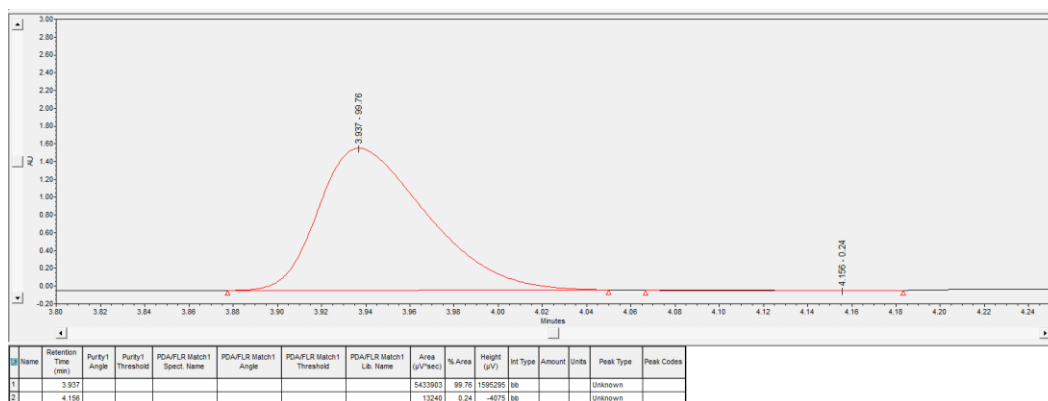

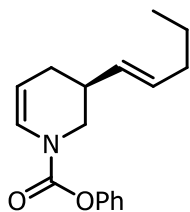

**Phenyl-(S,E)-3-(pent-1-en-1-yl)-3,4-dihydropyridine-1(2H)-carboxylate (3a1):**

The corresponding compound was prepared following general procedure **A** using pent-1-en-1-yl boronic acid and phenyl pyridine-1(2H)-carboxylate. The mixture was stirred at 70 °C for 20 hours. Purification by flash chromatography (100% petrol to 5% acetone/petrol) afforded compound **3a1** as viscous liquid (62% yield, 99% ee).

**<sup>1</sup>H NMR** (CDCl<sub>3</sub>, 400 MHz) (2 rotamers): δ (ppm) 7.37 (t, *J* = 8.0 Hz, 2H), 7.22 (t, *J* = 7.4 Hz, 1H), 7.13 (d, *J* = 8.0 Hz, 2H), 7.02 – 6.85 (m, 1H), 5.65 – 5.51 (m, 1H), 5.39 (dt, *J* = 15.3, 7.4 Hz, 1H), 5.11 – 4.96 (m, 1H), 4.05 (td, *J* = 14.4, 2.8 Hz, 1H), 3.38 – 3.02 (m, 1H), 2.64 – 2.42 (m, 1H), 2.20 (dt, *J* = 17.5, 5.0 Hz, 1H), 2.06 – 1.90 (m, 3H), 1.50 – 1.31 (m, 2H), 0.90 (td, *J* = 7.4, 3.5 Hz, 3H). **<sup>13</sup>C NMR** (101 MHz, CDCl<sub>3</sub>) (2 rotamers): δ (ppm) 152.3, 151.9, 151.3, 151.1, 131.64, 131.6, 130.9, 130.8, 129.5, 125.6, 125.1, 124.8, 121.8, 121.78, 107.2, 106.9, 47.8, 47.2, 35.3, 35.2, 34.8, 29.8, 28.3, 28.2, 22.6, 13.7.

**HRMS** (ESI): *m/z* calcd for C<sub>17</sub>H<sub>21</sub>O<sub>2</sub>NNa<sup>+</sup> [*M* + Na]<sup>+</sup> 294.1465 found 294.1471s.

**IR** (ν<sub>max</sub>/cm<sup>-1</sup>) 1728, 1408, 1364, 1204, 972, 750, 689.

**SFC Conditions:** Chiralpak IA; Gradient 1; 99.5:0.5 er (major enantiomer *t<sub>R</sub>* = 2.36 min; minor enantiomer *t<sub>R</sub>* = 2.25 min), **99% ee**. [*α*]<sub>D</sub><sup>25</sup> = -34.2 (*c* = 2.0, CHCl<sub>3</sub>).

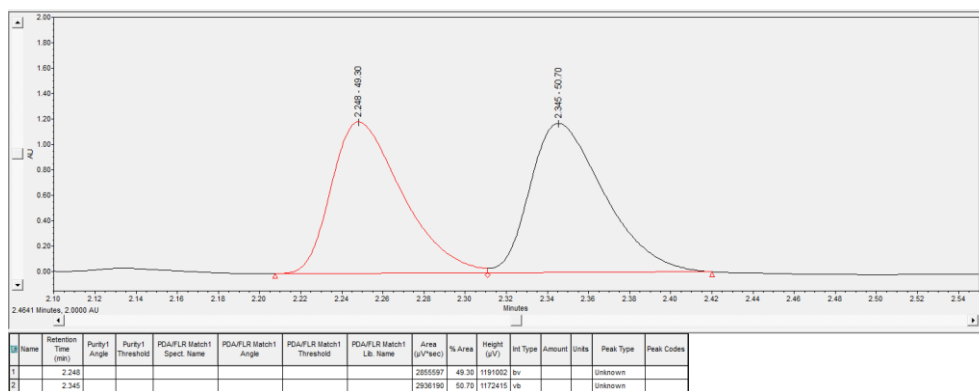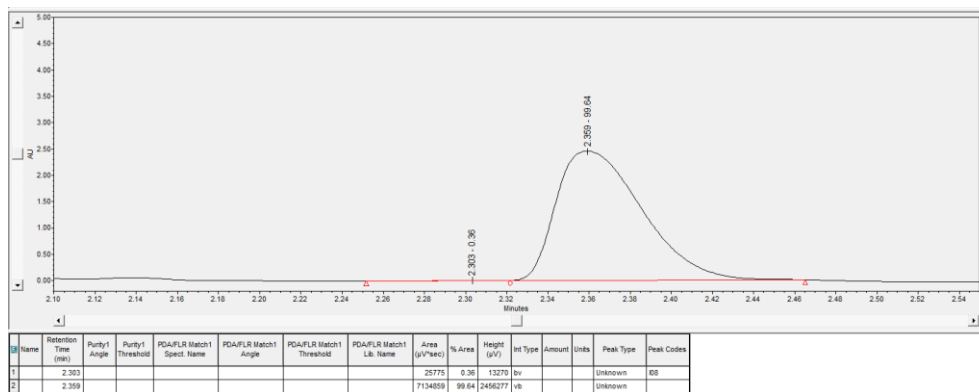

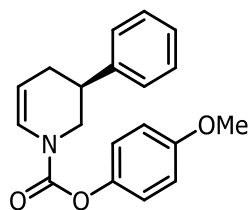

#### 4-Methoxyphenyl-(S)-3-phenyl-3,4-dihydropyridine-1(2H)-carboxylate (3am):

The corresponding compound was prepared following general procedure **A** using phenyl boronic acid and 4-methoxyphenyl pyridine-1(2H)-carboxylate. The mixture was stirred at 70 °C for 20 hours. Purification by flash chromatography (2% acetone/petrol to 25% acetone/petrol) afforded compound **3am** as viscous liquid (85% yield, 98% ee).

**<sup>1</sup>H NMR** (CDCl<sub>3</sub>, 400 MHz) (2 rotamers): δ (ppm) 7.36 – 7.16 (m, 5H), 7.10 – 6.92 (m, 3H), 6.90 – 6.78 (m, 2H), 5.21 – 5.05 (m, 1H), 4.31 – 4.20 (m, 1H), 3.77 – 3.70 (m, 3H), 3.50 – 3.17 (m, 1H), 3.05 (ddq, *J* = 14.3, 7.4, 3.7 Hz, 1H), 2.40 – 2.23 (m, 2H). **<sup>13</sup>C NMR** (126 MHz, CDCl<sub>3</sub>) (2 rotamers): δ (ppm) 157.2, 152.5, 152.1, 144.7, 144.6, 142.8, 142.7, 128.9, 128.8, 127.3, 127.1, 127.06, 125.3, 125.0, 122.6, 122.5, 114.51, 114.5, 107.7, 107.3, 55.7, 48.5, 48.0, 38.7, 38.6, 29.5, 29.3.

**HRMS** (ESI): *m/z* calcd for C<sub>19</sub>H<sub>19</sub>O<sub>3</sub>NNa<sup>+</sup> [M + Na]<sup>+</sup> 332.1257 found 332.1257.

**IR** (ν<sub>max</sub>/cm<sup>-1</sup>) 1721, 1508, 1406, 1362, 1249, 1198, 1070, 1034, 974, 862, 817, 757, 701.

**SFC Conditions:** Chiralpak IB; Gradient 1; 99:1 er (major enantiomer *t<sub>R</sub>* = 4.10 min; minor enantiomer *t<sub>R</sub>* = 3.94 min), **98% ee**. [α]<sub>D</sub><sup>25</sup> = -46.8 (*c* = 2.0, CHCl<sub>3</sub>).

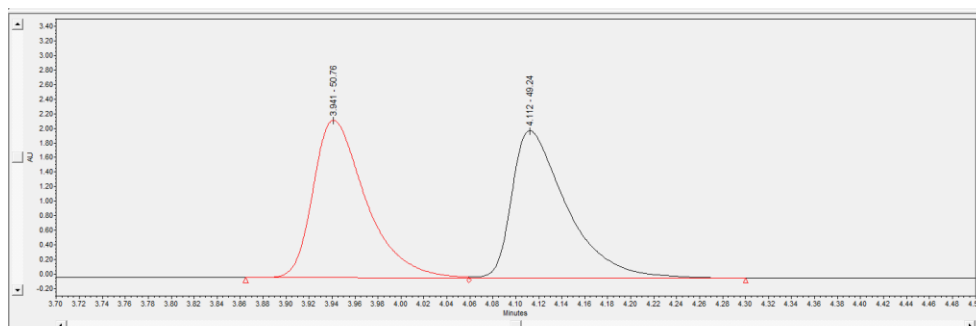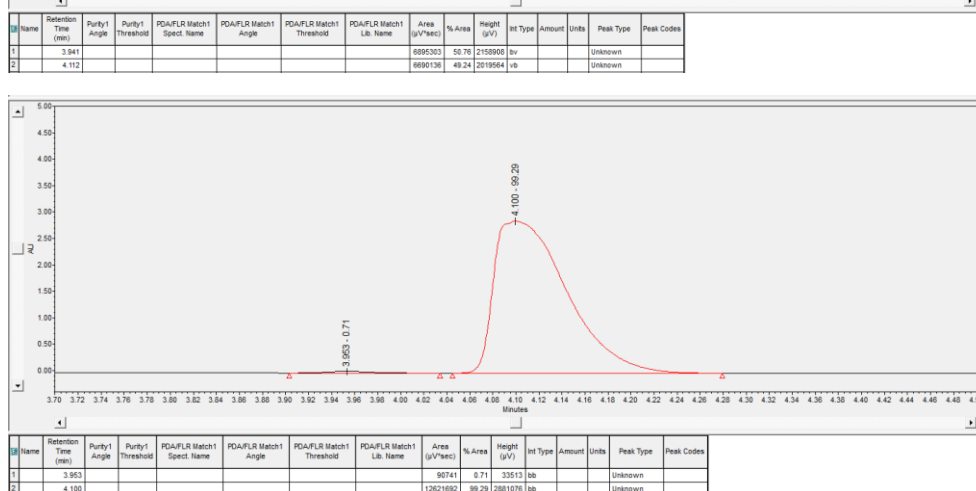

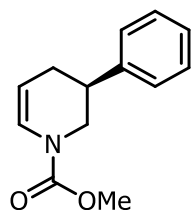

**Methyl-(S)-3-phenyl-3,4-dihydropyridine-1(2H)-carboxylate (3an):** The corresponding compound was prepared following general procedure **A** using phenyl boronic acid and methyl pyridine-1(2H)-carboxylate. The mixture was stirred at 70 °C for 20 hours. Purification by flash chromatography (2% acetone/petrol to 15% acetone/petrol) afforded compound **3an** as viscous liquid (72% yield, 99% ee).

**<sup>1</sup>H NMR** (CDCl<sub>3</sub>, 500 MHz) (2 rotamers): δ (ppm) 7.43 – 7.16 (m, 5H), 7.07 – 6.80 (m, 1H), 5.23 – 4.95 (m, 1H), 4.34 – 4.03 (m, 1H), 3.86 – 3.72 (m, 3H), 3.32 – 3.20 (m, 1H), 3.01 (ddt, *J* = 15.2, 6.3, 3.8 Hz, 1H), 2.32 (dt, *J* = 9.8, 2.5 Hz, 2H). **<sup>13</sup>C NMR** (126 MHz, CDCl<sub>3</sub>) (2 rotamers): δ (ppm) δ 154.1, 153.8, 143.1, 142.9, 128.8, 127.3, 127.0, 125.4, 125.0, 106.4, 106.2, 53.1, 48.0, 47.7, 38.7, 38.6, 29.4, 29.3.

**HRMS** (ESI): *m/z* calcd for C<sub>13</sub>H<sub>15</sub>O<sub>2</sub>N<sup>+</sup> [M + H]<sup>+</sup> 218.1176 found 218.1181.

**IR** (ν<sub>max</sub>/cm<sup>-1</sup>) 1704, 1447, 1405, 1355, 1268, 1204, 1121, 1052, 980, 762, 701.

**SFC Conditions:** Chiralpak IC; Gradient 1; 99.5:0.5 er (major enantiomer *t*<sub>R</sub> = 2.82 min; minor enantiomer *t*<sub>R</sub> = 2.92 min), **99% ee**. [α]<sub>D</sub><sup>25</sup> = -30.7 (c = 2.0, CHCl<sub>3</sub>).

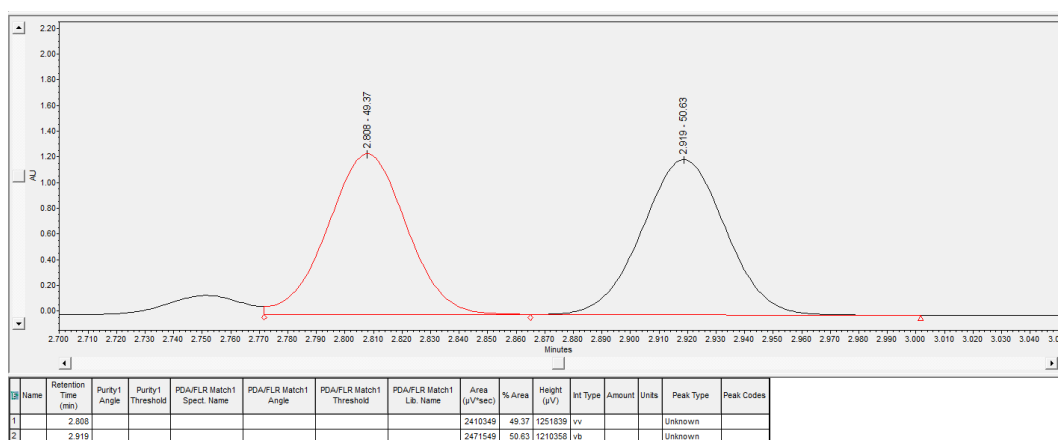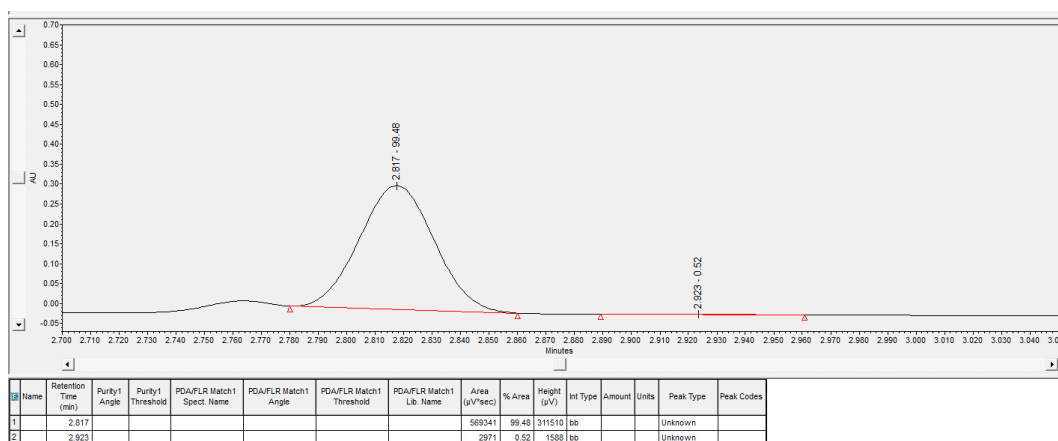

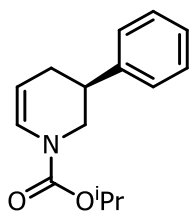

**Isopropyl-(S)-3-phenyl-3,4-dihydropyridine-1(2H)-carboxylate (3ao):** The corresponding compound was prepared following general procedure **A** using phenyl boronic acid and isopropyl pyridine-1(2H)-carboxylate. The mixture was stirred at 70 °C for 20 hours. Purification by flash chromatography (2% acetone/petrol to 15% acetone/petrol) afforded compound **3ao** as viscous liquid (86% yield, 97% ee).

**<sup>1</sup>H NMR** (CDCl<sub>3</sub>, 400 MHz) (2 rotamers): δ (ppm) 7.40 – 7.13 (m, 5H), 7.04 – 6.82 (m, 1H), 5.14 – 5.04 (m, 2H), 4.30 – 4.00 (m, 1H), 3.22 (dt, *J* = 23.4, 12.0 Hz, 1H), 2.99 (tdd, *J* = 10.4, 6.5, 3.7 Hz, 1H), 2.38 – 2.20 (m, 2H), 1.37 – 1.18 (m, 6H). **<sup>13</sup>C NMR** (101 MHz, CDCl<sub>3</sub>) (2 rotamers): δ (ppm) 153.3, 153.0, 143.3, 143.1, 128.8, 128.7, 127.4, 127.3, 127.0, 126.9, 125.5, 125.2, 106.0, 105.7, 69.5, 47.9, 47.5, 38.8, 38.7, 29.6, 22.3.

**HRMS** (ESI): *m/z* calcd for C<sub>15</sub>H<sub>20</sub>O<sub>2</sub>N<sup>+</sup> [M + H]<sup>+</sup> 246.1489 found 246.1493.

**IR** (ν<sub>max</sub>/cm<sup>-1</sup>) 1702, 1413, 1385, 1320, 1266, 1180, 1110, 924, 759, 701.

**SFC Conditions:** Chiralpak IC; Gradient 1; 98.5:1.5 er (major enantiomer *t<sub>R</sub>* = 2.41 min; minor enantiomer *t<sub>R</sub>* = 2.58 min), **97% ee**. [α]<sub>D</sub><sup>25</sup> = -27.0 (c = 2.0, CHCl<sub>3</sub>).

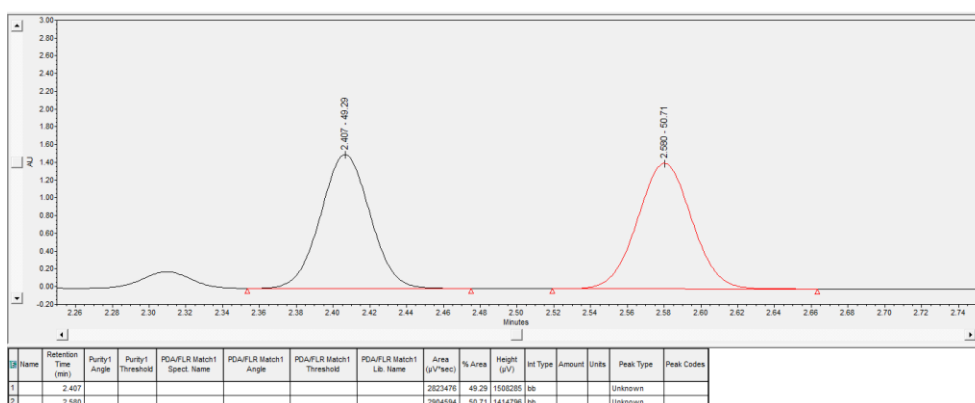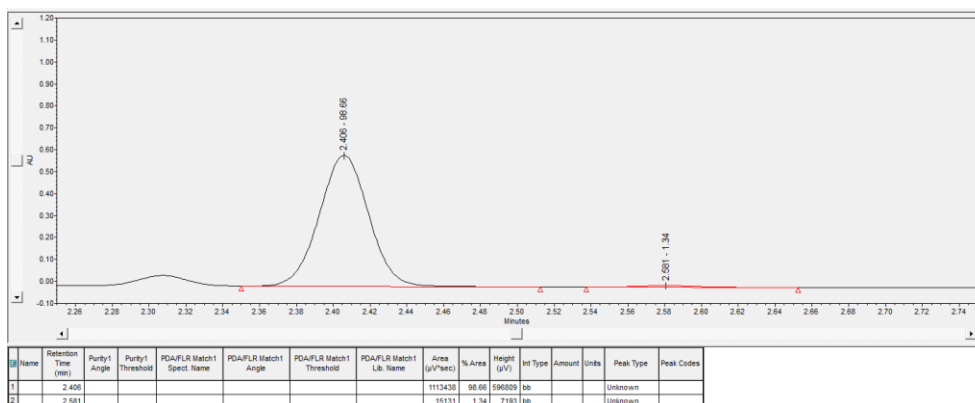

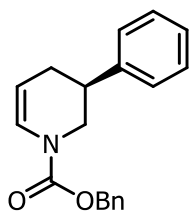

**Benzyl-(S)-3-phenyl-3,4-dihydropyridine-1(2H)-carboxylate (3ap):** The corresponding compound was prepared following general procedure **A** using phenyl boronic acid and benzyl pyridine-1(2H)-carboxylate. The mixture was stirred at 70 °C for 20 hours. Purification by flash chromatography (2% acetone/petrol to 15% acetone/petrol) afforded compound **3ap** as viscous liquid (68% yield, 99% ee).

**<sup>1</sup>H NMR** (CDCl<sub>3</sub>, 400 MHz) (2 rotamers): δ (ppm) 7.46 – 7.19 (m, 10H), 7.09 – 6.89 (m, 1H), 5.29 – 4.97 (m, 3H), 4.34 – 4.08 (m, 1H), 3.31 (dt, *J* = 23.9, 11.8 Hz, 1H), 3.10 – 2.97 (m, 1H), 2.33 (d, *J* = 7.2 Hz, 2H). **<sup>13</sup>C NMR** (101 MHz, CDCl<sub>3</sub>) (2 rotamers): δ (ppm) 153.6, 153.2, 143.1, 142.9, 136.4, 128.8, 128.7, 128.4, 128.3, 128.2, 127.4, 127.3, 127.1, 127.0, 125.5, 125.0, 106.7, 106.4, 67.8, 67.7, 48.0, 47.8, 38.7, 38.6, 29.5.

**HRMS** (ESI): *m/z* calcd for C<sub>19</sub>H<sub>20</sub>O<sub>2</sub>N<sup>+</sup> [M + H]<sup>+</sup> 294.1489 found 294.1488.

**IR** (ν<sub>max</sub>/cm<sup>-1</sup>) 1704, 1411, 1342, 1265, 1115, 757, 699.

**SFC Conditions:** Chiralpak IF; Gradient 1; 99.5:0.5 er (major enantiomer *t<sub>R</sub>* = 3.81 min; minor enantiomer *t<sub>R</sub>* = 4.02 min), **99% ee**. [α]<sub>D</sub><sup>25</sup> = -23.5 (c = 2.0, CHCl<sub>3</sub>).

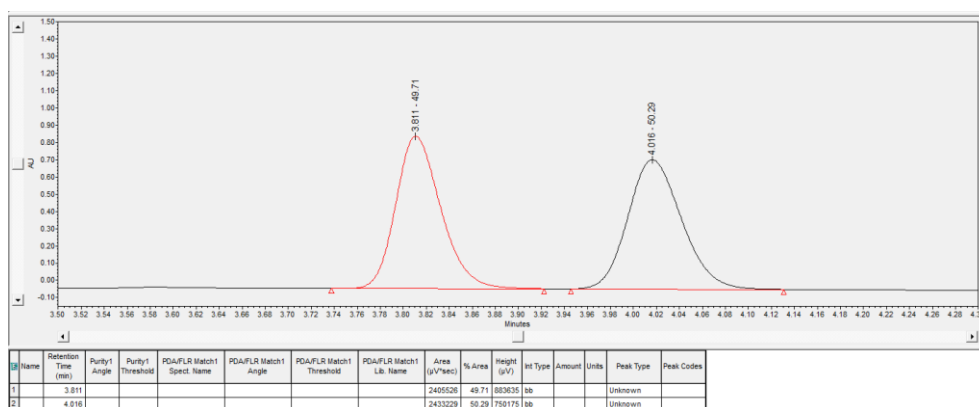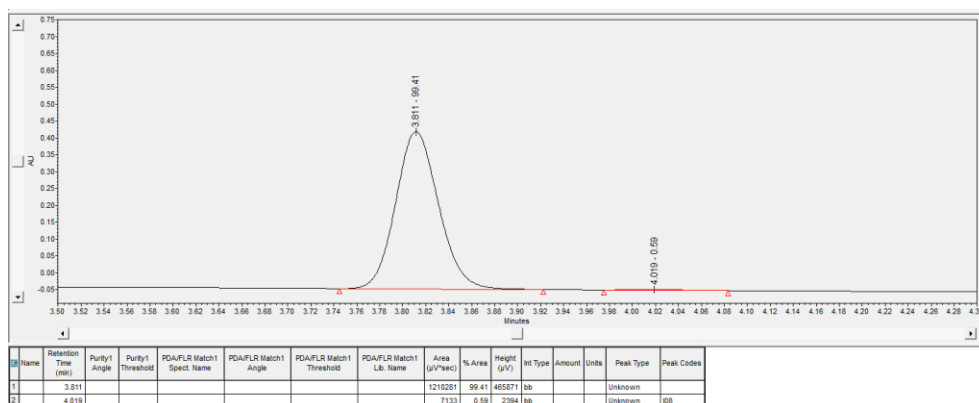



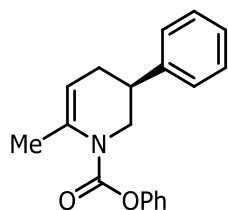

**Phenyl-(S)-6-methyl-3-phenyl-3,4-dihydropyridine-1(2H)-carboxylate (3aq):** The corresponding compound was prepared following general procedure **A** using phenyl boronic acid and phenyl 6-methylpyridine-1(2H)-carboxylate. The mixture was stirred at 70 °C for 20 hours. Purification by flash chromatography (2% acetone/petrol to 15% acetone/petrol) afforded compound **3aq** as viscous liquid (57% yield, 91% ee).

**<sup>1</sup>H NMR** (CDCl<sub>3</sub>, 400 MHz) (2 rotamers): δ (ppm) 7.39 – 7.24 (m, 8H), 7.22 – 7.14 (m, 1H), 6.94 (d, *J* = 7.8 Hz, 1H), 5.23 – 5.16 (m, 1H), 4.19 (dd, *J* = 12.5, 3.0 Hz, 1H), 3.66 – 3.54 (m, 1H), 3.19 (qd, *J* = 8.4, 3.2 Hz, 1H), 2.51 (dddd, *J* = 18.3, 6.1, 4.0, 2.0 Hz, 1H), 2.41 – 2.28 (m, 1H), 2.24 (q, *J* = 2.0 Hz, 3H). **<sup>13</sup>C NMR** (101 MHz, CDCl<sub>3</sub>) (2 rotamers): δ (ppm) 152.8, 151.1, 143.3, 135.8, 129.3, 128.8, 127.3, 126.9, 125.5, 121.8, 112.8, 50.8, 39.7, 30.6, 22.0.

**HRMS** (ESI): *m/z* calcd for C<sub>19</sub>H<sub>19</sub>O<sub>2</sub>NNa<sup>+</sup> [*M* + Na]<sup>+</sup> 316.1308 found 316.1308.

**IR** (ν<sub>max</sub>/cm<sup>-1</sup>) 1722, 1493, 1385, 1204, 752, 702, 755, 701.

**SFC Conditions:** Chiralpak IC; Gradient 1; 95.5:4.5 er (major enantiomer *t<sub>R</sub>* = 3.86 min; minor enantiomer *t<sub>R</sub>* = 3.53 min), **91% ee**. [*α*]<sub>D</sub><sup>25</sup> = -40.7 (*c* = 2.0, CHCl<sub>3</sub>).

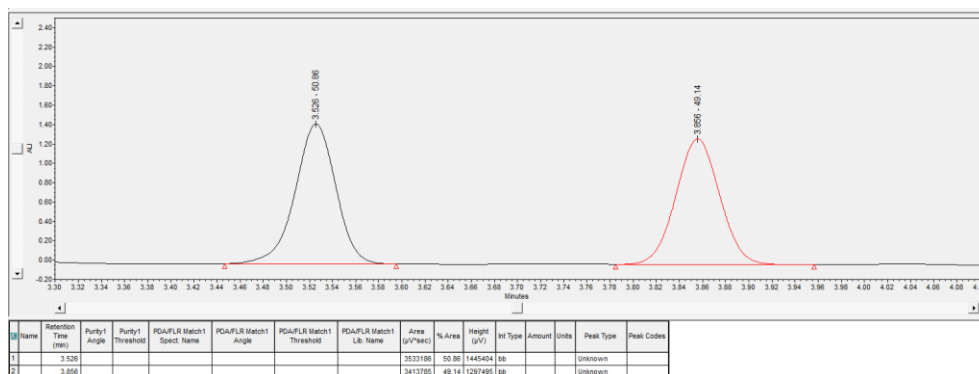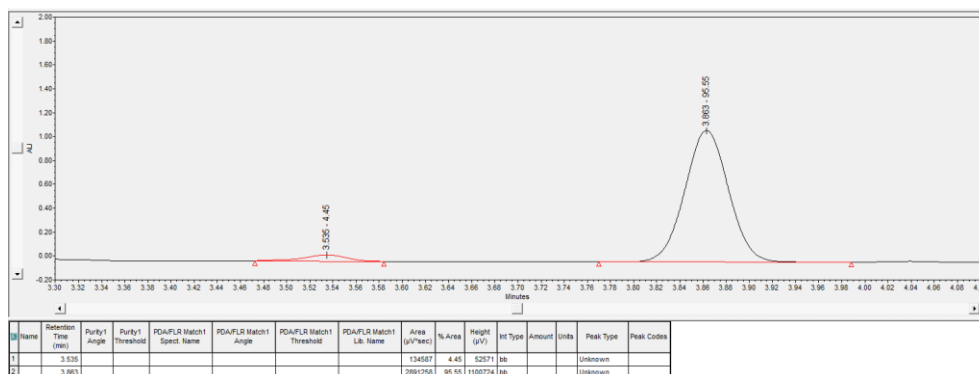

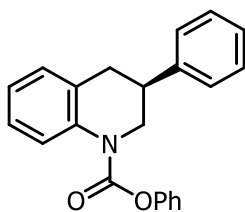

**Phenyl-(S)-3-phenyl-3,4-dihydroquinoline-1(2H)-carboxylate (3as):** The corresponding compound was prepared following general procedure **A** using phenyl boronic acid and phenyl quinoline-1(2H)-carboxylate. The mixture was stirred at 30 °C for 48 hours. Purification by flash chromatography (2% acetone/petrol to 15% acetone/petrol) afforded compound **3as** as viscous liquid (85% yield, 90% ee).

**<sup>1</sup>H NMR** (CDCl<sub>3</sub>, 400 MHz) (2 rotamers): δ (ppm) 7.87 (d, *J* = 7.7 Hz, 1H), 7.41 – 7.28 (m, 7H), 7.22 (ddd, *J* = 9.0, 6.5, 4.5 Hz, 3H), 7.15 – 7.03 (m, 3H), 4.36 (ddd, *J* = 12.7, 4.1, 1.2 Hz, 1H), 3.89 – 3.79 (m, 1H), 3.33 (tt, *J* = 9.6, 4.9 Hz, 1H), 3.23 (dd, *J* = 16.4, 5.7 Hz, 1H), 3.12 (dd, *J* = 16.4, 9.6 Hz, 1H). **<sup>13</sup>C NMR** (101 MHz, CDCl<sub>3</sub>) (2 rotamers): δ (ppm) 153.3, 151.2, 142.6, 137.8, 129.4, 129.0, 128.9, 127.4, 127.2, 126.4, 125.6, 124.4, 124.1, 121.8, 51.1, 40.3, 34.7.

**HRMS** (ESI): *m/z* calcd for C<sub>22</sub>H<sub>20</sub>O<sub>2</sub>N<sup>+</sup> [M + H]<sup>+</sup> 330.1489 found 330.1491.

**IR** (ν<sub>max</sub>/cm<sup>-1</sup>) 1722, 1492, 1380, 1197, 1130, 755, 701.

**SFC Conditions:** Chiralpak IC; Gradient 1; 95:5 er (major enantiomer *t<sub>R</sub>* = 5.11 min; minor enantiomer *t<sub>R</sub>* = 4.74 min), **90% ee**. [α]<sub>D</sub><sup>25</sup> = -7.9 (c = 2.0, CHCl<sub>3</sub>).

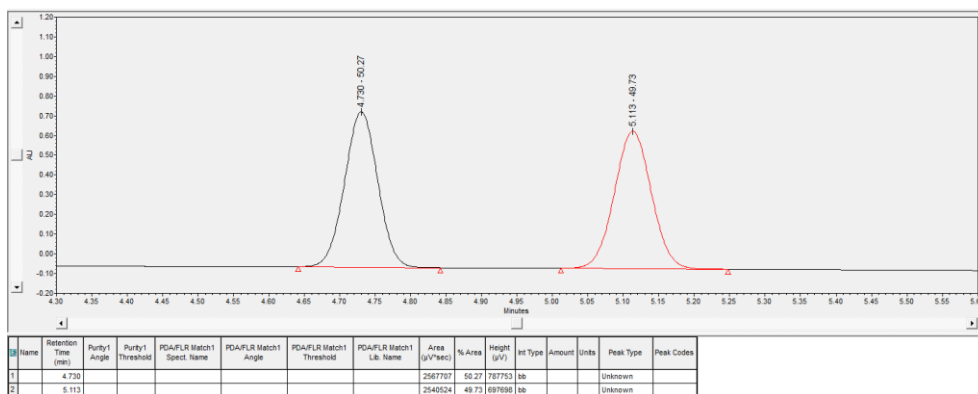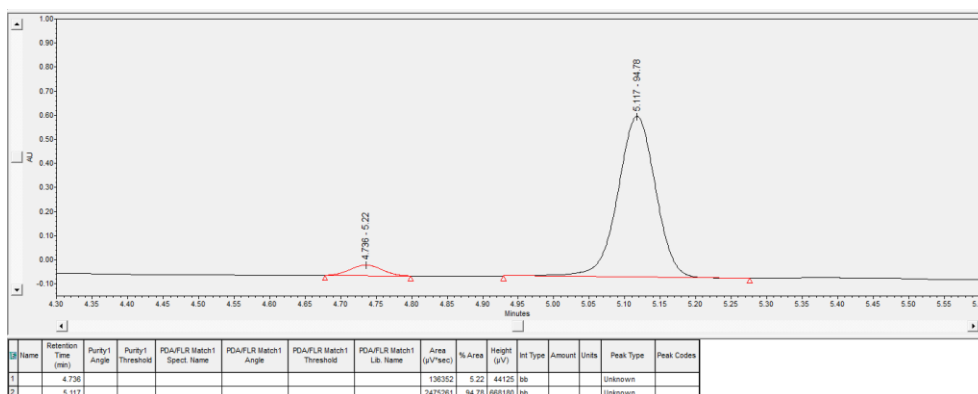

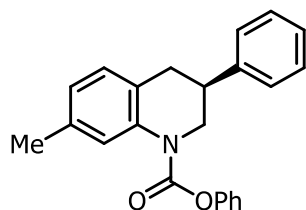

**Phenyl-(S)-6-methyl-3-phenyl-3,4-dihydroquinoline-1(2H)-carboxylate (3at):** The corresponding compound was prepared following general procedure **A** using phenyl boronic acid and phenyl 6-methylquinoline-1(2H)-carboxylate. The mixture was stirred at 30 °C for 48 hours. Purification by flash chromatography (5% acetone/petrol to 25% acetone/petrol) afforded compound **3at** as viscous liquid (87% yield, 85% ee).

**<sup>1</sup>H NMR** (CDCl<sub>3</sub>, 500 MHz) (2 rotamers): δ (ppm) 7.71 (s, 1H), 7.39 – 7.32 (m, 4H), 7.32 – 7.27 (m, 2H), 7.23 – 7.18 (m, 1H), 7.09 (d, *J* = 7.8 Hz, 1H), 7.03 (d, *J* = 7.8 Hz, 2H), 6.93 (dd, *J* = 7.8, 1.7 Hz, 1H), 4.32 (ddd, *J* = 12.8, 4.1, 1.2 Hz, 1H), 3.84 (t, *J* = 11.2 Hz, 1H), 3.31 (tdd, *J* = 9.6, 5.8, 4.1 Hz, 1H), 3.18 (dd, *J* = 16.4, 5.8 Hz, 1H), 3.07 (dd, *J* = 16.4, 9.2 Hz, 1H), 2.35 (s, 3H). **<sup>13</sup>C NMR** (126 MHz, CDCl<sub>3</sub>) (2 rotamers): δ (ppm) 153.34, 151.21, 142.73, 137.63, 136.16, 129.39, 128.91, 128.80, 127.41, 127.16, 126.34, 125.61, 125.39, 124.42, 121.88, 51.11, 40.34, 34.27, 21.47.

**HRMS** (ESI): *m/z* calcd for C<sub>23</sub>H<sub>22</sub>O<sub>2</sub>N<sup>+</sup> [M + H]<sup>+</sup> 344.1645 found 344.1641.

**IR** (ν<sub>max</sub>/cm<sup>-1</sup>) 1723, 1508, 1494, 1455, 1385, 1335, 1269, 1199, 1164, 1119, 752, 701, 645.

**SFC Conditions:** Chiralpak IC; Gradient 1; 92.5:7.5 er (major enantiomer *t<sub>R</sub>* = 4.94 min; minor enantiomer *t<sub>R</sub>* = 4.63 min), **85% ee**. [α]<sub>D</sub><sup>25</sup> = +8.2 (c = 2.0, CHCl<sub>3</sub>).

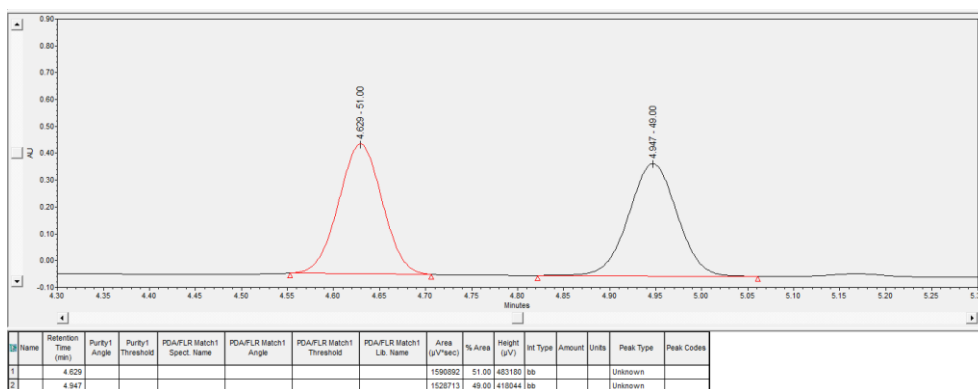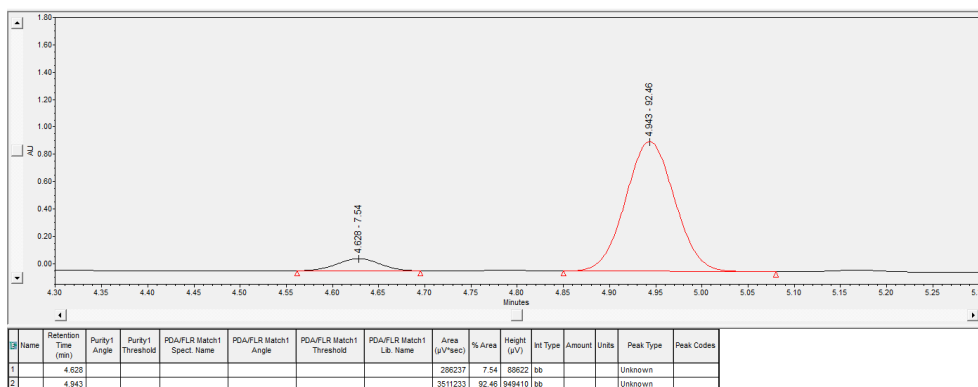

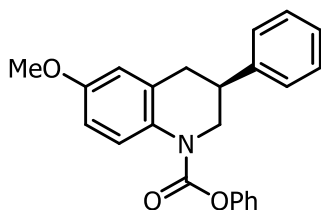

**Phenyl-(S)-6-methoxy-3-phenyl-3,4-dihydroquinoline-1(2H)-carboxylate (3au):**

The corresponding compound was prepared following general procedure **A** using phenyl boronic acid and phenyl 6-methoxyquinoline-1(2H)-carboxylate. The mixture was stirred at 30 °C for 48 hours. Purification by flash chromatography (5% acetone/petrol to 25% acetone/petrol) afforded compound **3au** as viscous liquid (82% yield, 85% ee).

**<sup>1</sup>H NMR** (CDCl<sub>3</sub>, 500 MHz) (2 rotamers): δ (ppm) 7.76 (s, 1H), 7.39 – 7.27 (m, 7H), 7.19 (t, *J* = 7.4 Hz, 1H), 7.07 – 7.00 (m, 2H), 6.80 (dd, *J* = 9.0, 2.8 Hz, 1H), 6.73 (d, *J* = 2.8 Hz, 1H), 4.31 (dd, *J* = 12.7, 4.0 Hz, 1H), 3.86– 3.67 (m, 4H), 3.32 (tt, *J* = 9.4, 5.1 Hz, 1H), 3.19 (dd, *J* = 16.6, 5.8 Hz, 1H), 3.09 (dd, *J* = 16.6, 9.4 Hz, 1H). **<sup>13</sup>C NMR** (126 MHz, CDCl<sub>3</sub>) (2 rotamers): δ (ppm) 156.3, 153.3, 151.2, 142.6, 131.1, 129.4, 128.9, 127.4, 127.2, 125.5, 125.2, 121.8, 115.4, 113.6, 112.2, 55.6, 51.0, 40.4, 34.9.

**HRMS** (ESI): *m/z* calcd for C<sub>23</sub>H<sub>21</sub>O<sub>3</sub>N<sup>+</sup> [M + H]<sup>+</sup> 360.1594 found 360.1590.

**IR** (ν<sub>max</sub>/cm<sup>-1</sup>) 1719, 1503, 1386, 1318, 1272, 1194, 1164, 1118, 749, 701, 690, 645.

**SFC Conditions:** Chiralpak IB; Gradient 1; 92.5:7.5 er (major enantiomer *t<sub>R</sub>* = 4.77 min; minor enantiomer *t<sub>R</sub>* = 4.58 min), **85% ee**. [α]<sub>D</sub><sup>25</sup> = +9.0 (c = 2.0, CHCl<sub>3</sub>).

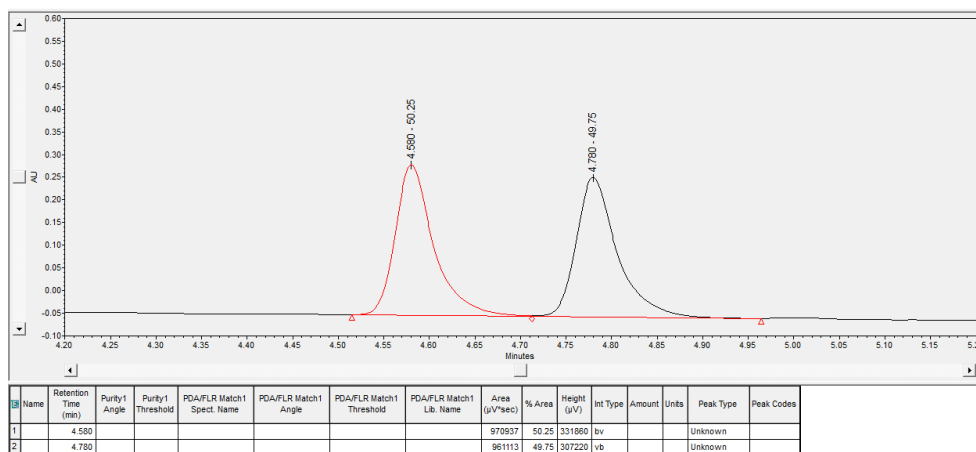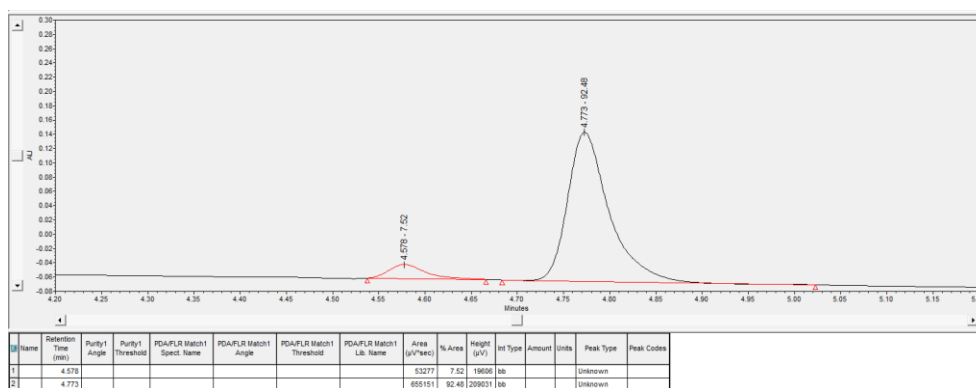

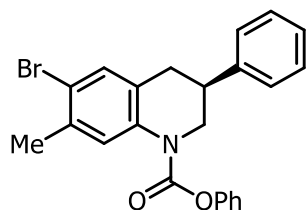

**Phenyl-(S)-6-bromo-7-methyl-3-phenyl-3,4-dihydroquinoline-1(2H)-carboxylate (3av):** The corresponding compound was prepared following general procedure **A** using phenyl boronic acid and phenyl 6-bromo-7-methylquinoline-1(2H)-carboxylate. The mixture was stirred at 70 °C for 20 hours. Purification by flash chromatography (2% acetone/petrol to 25% acetone/petrol) afforded compound **3av** as viscous liquid (80% yield, 86% ee).

**<sup>1</sup>H NMR** (CDCl<sub>3</sub>, 500 MHz) (2 rotamers): δ (ppm) 7.84 (s, 1H), 7.41 – 7.27 (m, 8H), 7.25 – 7.20 (m, 1H), 7.02 (d, *J* = 8.0 Hz, 2H), 4.30 (ddd, *J* = 12.8, 4.0, 1.2 Hz, 1H), 3.88 (t, *J* = 11.1 Hz, 1H), 3.31 (tdd, *J* = 9.4, 5.8, 3.9 Hz, 1H), 3.17 (dd, *J* = 16.5, 5.8 Hz, 1H), 3.07 (dd, *J* = 16.5, 9.0 Hz, 1H), 2.40 (s, 3H). **<sup>13</sup>C NMR** (126 MHz, CDCl<sub>3</sub>) (2 rotamers): δ (ppm) 153.1, 151.0, 142.1, 136.9, 135.8, 132.1, 129.4, 129.0, 128.6, 127.32, 127.3, 125.9, 125.7, 121.8, 119.9, 51.0, 39.8, 33.8, 22.9.

**HRMS** (ESI): *m/z* calcd for C<sub>23</sub>H<sub>21</sub>O<sub>2</sub>NBr<sup>+</sup> [M + H]<sup>+</sup> 422.0750 found 422.0740.

**IR** (ν<sub>max</sub>/cm<sup>-1</sup>) 1724, 1492, 1383, 1203, 1163, 757, 700.

**SFC Conditions:** Chiralpak ID; Gradient 1; 93:7 er (major enantiomer *t<sub>R</sub>* = 4.59 min; minor enantiomer *t<sub>R</sub>* = 4.98 min), **86% ee**. [α]<sub>D</sub><sup>25</sup> = +45.8 (c = 2.0, CHCl<sub>3</sub>).

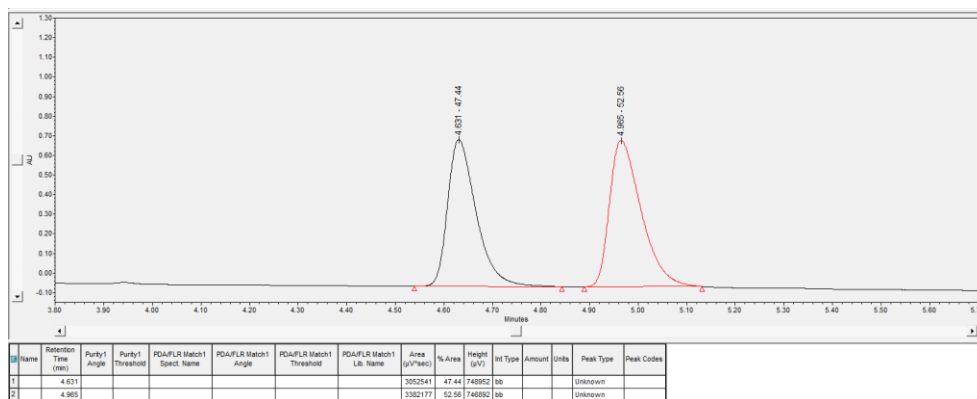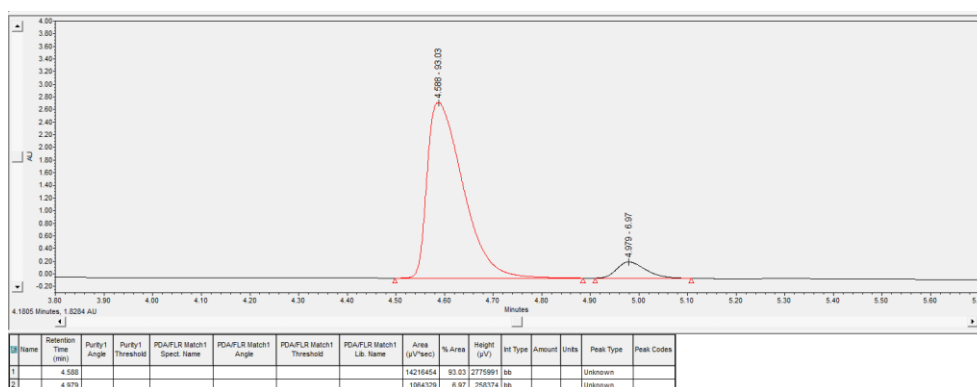

## 4. Derivatization of Chiral Tetrahydropyridines

### Synthesis of trisubstituted piperidine (**4**):

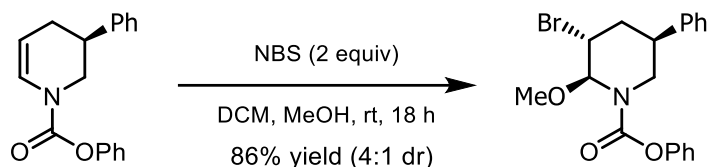

A solution of N-bromosuccinimide (75 mg, 0.42 mmol) in methanol (1 mL) was added to a solution of dihydropyridine **3a** (58 mg, 0.21 mmol) in DCM (1 mL) at 0 °C then the mixture was allowed to warm to room temperature. After 16 h, the mixture was poured into a saturated aqueous solution of NaHCO<sub>3</sub>. The aqueous phase was extracted three times with DCM and the solvent was removed in vacuo. The residue was purified by flash chromatography on silica gel (5% acetone/petrol to 20% acetone/petrol) affording **4** (86% yield, 4:1 dr) as yellow oil.

**<sup>1</sup>H NMR** (CDCl<sub>3</sub>, 500 MHz) (2 rotamers \* 2 diastereomers): δ (ppm) 7.44 – 7.10 (m, 10H), 5.75 – 5.58 (m, 1H), 4.56 – 4.12 (m, 2H), 3.61 – 3.37 (m, 4H), 3.32 – 3.07 (m, 1H), 2.71 – 2.54 (m, 1H), 2.46 – 2.11 (m, 1H). **<sup>13</sup>C NMR** (126 MHz, CDCl<sub>3</sub>) (2 rotamers, peak picked major diastereomer): δ (ppm) 154.8, 154.4, 151.3, 151.2, 141.6, 141.5, 129.5, 129.4, 128.9, 128.8, 127.5, 127.34, 127.26, 125.8, 125.6, 121.9, 121.7, 85.4, 84.7, 55.8, 55.4, 49.3, 48.7, 45.1, 44.3, 36.7, 36.3, 34.0, 33.9. **[α]<sub>D</sub><sup>25</sup>** = +42.5 (c = 2.0, CHCl<sub>3</sub>).

**HRMS** (ESI): m/z calcd for C<sub>19</sub>H<sub>21</sub>O<sub>3</sub>NBr<sup>+</sup> [M + H]<sup>+</sup> 390.0699 found 390.0721.

**IR** (ν<sub>max</sub>/cm<sup>-1</sup>) 2935, 1726, 1596, 1495, 1455, 1415, 1351, 1267, 1206, 1163, 1069, 941, 876, 833, 756, 729, 701, 689.

### Access towards (-) Preclamol:

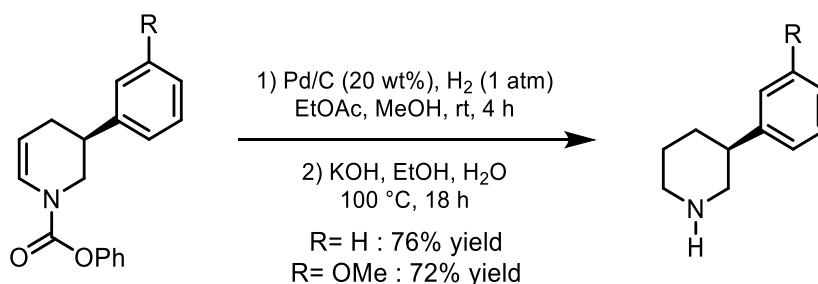

A solution of dihydropyridine (0.5 mmol) in MeOH (1 mL) was added to a vial containing Pd/C (20 wt.%) in EtOAc (1 mL). The reaction mixture was purged with hydrogen (1 atm) balloon and stirred at room temperature. After 15 min of purging, the mixture was stirred under hydrogen atmosphere for 4 h. Upon completion of reaction, the mixture was diluted with Et<sub>2</sub>O (5 mL) before passing through a plug of celite. The plug was washed with additional 10 mL of Et<sub>2</sub>O and the solvents were removed in vacuo. Purification by flash chromatography (2% acetone/petrol to 20% acetone/petrol) afforded protected piperidine as viscous liquid.

A sealed flask protected piperidine (obtained above) and KOH (5 mmol, 10 equiv) in EtOH (3 mL) and H<sub>2</sub>O (1 mL) was heated at 100 °C. After 18h, the mixture was warmed to room

temperature and diluted with H<sub>2</sub>O (10 mL). The aqueous layer was extracted with DCM (2 × 10 mL). The combined organic layer was dried over anhydrous Na<sub>2</sub>SO<sub>4</sub>, filtered, and the solvent was removed in vacuo to afford the corresponding amine.

The hydrochloride salts were isolated by adding 4N HCL (in dioxane) to the solution of corresponding amine in DCM (2 ml). After 15 minutes, the mixture was diluted with Et<sub>2</sub>O (15 ml), precipitated solid was filtered then dried under vacuum to provide the corresponding product as off white solid.

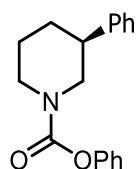

**Phenyl (S)-3-phenyl piperidine-1-carboxylate (S13):** The corresponding compound was prepared following the procedure described above using dihydropyridine (**3a**) as viscous liquid. **<sup>1</sup>H NMR** (CDCl<sub>3</sub>, 500 MHz) (2 rotamers): δ (ppm) 7.42 – 7.06 (m, 10H), 4.48 – 4.25 (m, 2H), 3.12 – 2.75 (m, 3H), 2.17 – 2.07 (m, 1H), 1.94 – 1.83 (m, 1H), 1.81 – 1.58 (m, 2H). **<sup>13</sup>C NMR** (126 MHz, CDCl<sub>3</sub>) (2 rotamers): δ (ppm) 153.8, 151.6, 143.1, 129.3, 128.7, 127.2, 126.9, 125.3, 121.9, 51.4, 51.0, 45.2, 44.7, 43.0, 42.5, 31.7, 25.9, 25.4. [ $\alpha$ ]<sup>25</sup><sub>D</sub> = -78.3 (c = 2.0, CHCl<sub>3</sub>).

**IR** ( $\nu_{\max}$ /cm<sup>-1</sup>) 2936, 1719, 1595, 1495, 1425, 1256, 1234, 1199, 1163, 1127, 1072, 1026, 981, 907, 831, 749, 701, 689, 670.

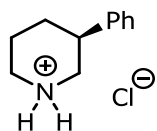

**(S)-3-Phenylpiperidine hydrochloride salt (5):** The corresponding compound was prepared following the procedure described as yellow solid (76% yield over 2 steps). **<sup>1</sup>H NMR** (500 MHz, CDCl<sub>3</sub>): δ (ppm) 9.73– 7.17 (m, 2H), 7.35 – 7.17 (m, 5H), 3.67 – 3.45 (m, 2H), 3.27 (t, *J* = 12.2 Hz, 1H), 2.92 (dq, *J* = 22.4, 11.4, 10.9 Hz, 2H), 2.14 (dd, *J* = 33.3, 14.1 Hz, 2H), 2.00 (d, *J* = 14.1 Hz, 1H), 1.73 – 1.61 (m, 1H). **<sup>13</sup>C NMR** (126 MHz, CDCl<sub>3</sub>) δ 140.9, 129.0, 127.6, 127.0, 49.4, 44.1, 39.6, 30.4, 22.7. [ $\alpha$ ]<sup>25</sup><sub>D</sub> = +6.7 (c = 0.3, CH<sub>3</sub>OH). The spectroscopic data satisfactorily matched previously reported data.<sup>4</sup>

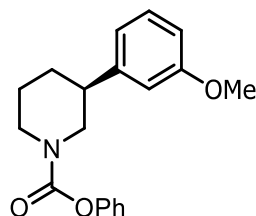

**Phenyl (S)-3-(3-methoxyphenyl) piperidine-1-carboxylate (S14):** The corresponding compound was prepared following the procedure described above using dihydropyridine (**3r**) as viscous liquid. **<sup>1</sup>H NMR** (CDCl<sub>3</sub>, 500 MHz) (2 rotamers): δ (ppm) 7.40 – 7.34 (m, 2H), 7.30 – 7.10 (m, 4H), 6.92 – 6.77 (m, 3H), 4.50 – 4.26 (m, 2H), 3.82 (s, 3H), 3.09 – 2.75 (m, 3H), 2.16 – 2.06 (m, 1H), 1.93 – 1.83 (m, 1H), 1.78 – 1.66 (m, 2H). **<sup>13</sup>C NMR** (126 MHz, CDCl<sub>3</sub>)

(2 rotamers):  $\delta$  (ppm)  $^{13}\text{C}$  NMR (126 MHz,  $\text{CDCl}_3$ )  $\delta$  159.9, 153.9, 151.6, 144.8, 129.7, 129.3, 125.3, 121.9, 119.5, 113.4, 113.2, 112.0, 111.8, 55.3, 51.3, 50.9, 45.2, 44.7, 43.0, 42.7, 31.7, 31.6, 25.8, 25.3.  $[\alpha]^{25}_{\text{D}} = -59.8$  ( $c = 2.0$ ,  $\text{CHCl}_3$ ).

**HRMS** (ESI):  $m/z$  calcd for  $\text{C}_{19}\text{H}_{22}\text{O}_3\text{N}^+$   $[\text{M} + \text{H}]^+$  312.1594 found 312.1605.

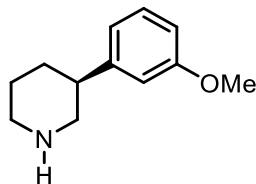

**(S)-3-(3-methoxyphenyl) piperidine (6):** The corresponding compound was prepared following the procedure described above as yellow oil (72% yield over 2 steps).

**(6):  $^1\text{H}$  NMR** (400 MHz,  $\text{CDCl}_3$ ):  $\delta$  (ppm) 10.02 – 9.36 (m, 2H), 7.25 – 7.15 (m, 1H), 6.83 – 6.67 (m, 3H), 3.76 (s, 3H), 3.49 (t,  $J = 10.2$  Hz, 2H), 3.20 (tt,  $J = 12.5, 3.5$  Hz, 1H), 2.89 (q,  $J = 16.7, 14.2$  Hz, 2H), 2.23 – 1.89 (m, 3H), 1.62 (qd,  $J = 12.5, 3.2$  Hz, 1H).  $[\alpha]^{25}_{\text{D}} = +10.6$  ( $c = 1.0$ ,  $\text{CH}_3\text{OH}$ ). The spectroscopic data satisfactorily matched previously reported data.<sup>4-6</sup>

**(6.HCl):  $^1\text{H}$  NMR** (500 MHz,  $\text{CDCl}_3$ ):  $\delta$  (ppm) 9.98 – 9.40 (m, 2H), 7.25 – 7.15 (m, 1H), 6.83 – 6.67 (m, 3H), 3.76 (s, 3H), 3.49 (t,  $J = 10.2$  Hz, 2H), 3.20 (tt,  $J = 12.6, 3.5$  Hz, 1H), 2.89 (q,  $J = 16.7, 14.2$  Hz, 2H), 2.23 – 1.89 (m, 3H), 1.62 (qd,  $J = 12.6, 3.2$  Hz, 1H).  **$^{13}\text{C}$  NMR** (126 MHz,  $\text{CDCl}_3$ )  $\delta$  160.0, 142.5, 130.0, 119.2, 112.91, 112.85, 55.3, 49.2, 44.0, 39.7, 30.3, 22.7.  $[\alpha]^{25}_{\text{D}} = +8.6$  ( $c = 2.1$ ,  $\text{CH}_3\text{OH}$ ). The spectroscopic data satisfactorily matched previously reported data.<sup>4-6</sup>

**HRMS** (ESI):  $m/z$  calcd for  $\text{C}_{12}\text{H}_{18}\text{ON}^+$   $[\text{M} + \text{H}]^+$  192.1383 found 192.1396.

**IR** ( $\nu_{\text{max}}/\text{cm}^{-1}$ ) 2935, 2854, 2361, 1698, 1602, 1585, 1492, 1468, 1436, 1263, 1192, 1160, 1048, 856, 784, 754, 700.



## Access towards Niraparib:

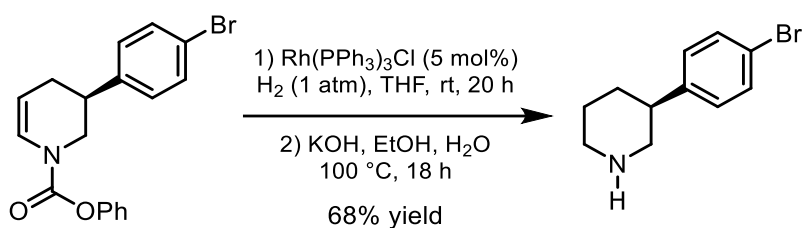

[Rh(PPh<sub>3</sub>)<sub>3</sub>Cl] (23 mg, 0.025 mmol, 5 mol%) was added to a 10 mL round bottom flask, sealed with a rubber septum, dissolved in THF (2 mL) and purged with hydrogen (1 atm) balloon while stirred at room temperature. After 10 min, a solution of **3k** (180 mg, 0.5 mmol, 1 equiv) in THF (2 mL) was added via syringe and again purged with hydrogen (1 atm) balloon while stirred at room temperature. After 15 min of purging, the mixture was stirred under hydrogen atmosphere for 18 h. Upon completion of reaction, the mixture was diluted with Et<sub>2</sub>O (5 mL) before passing through a plug of silica. The plug was washed with additional 10 mL of Et<sub>2</sub>O and the solvents were removed in vacuo. Purification by flash chromatography (5% acetone/petrol to 25% acetone/petrol) afforded protected piperidine as viscous liquid.

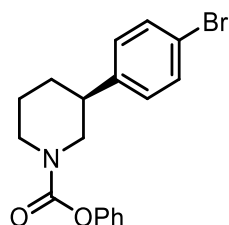

**Phenyl (S)-3-(4-bromophenyl) piperidine-1-carboxylate (S15):** <sup>1</sup>H NMR (CDCl<sub>3</sub>, 500 MHz) (2 rotamers): δ (ppm) 7.48 – 7.42 (m, 2H), 7.39 – 7.32 (m, 2H), 7.20 (t, *J* = 7.3 Hz, 1H), 7.17 – 7.06 (m, 4H), 4.43 – 4.27 (m, 2H), 3.09 – 2.71 (m, 3H), 2.11 – 2.03 (m, 1H), 1.91 – 1.82 (m, 1H), 1.77 – 1.64 (m, 2H). <sup>13</sup>C NMR (126 MHz, CDCl<sub>3</sub>) (2 rotamers): δ (ppm) 153.9, 151.5, 142.0, 131.8, 129.4, 129.0, 128.7, 127.8, 125.4, 121.9, 51.1, 50.7, 45.1, 44.6, 42.4, 42.0, 31.6, 25.8, 25.2. [α]<sup>25</sup><sub>D</sub> = –84.3 (c = 2.0, CHCl<sub>3</sub>).

**HRMS** (ESI): *m/z* calcd for C<sub>18</sub>H<sub>19</sub>O<sub>2</sub>BrN<sup>+</sup> [M + H]<sup>+</sup> 360.0594 found 360.0611.

**IR** (ν<sub>max</sub>/cm<sup>-1</sup>) 2940, 2860, 2361, 1722, 1594, 1492, 1465, 1426, 1255, 1235, 1208, 1164, 1129, 1075, 1010, 982, 818, 754, 717, 691.

A sealed flask containing protected piperidine **S15** (obtained above) and KOH (5 mmol, 10 equiv) in EtOH (3 mL) and H<sub>2</sub>O (1 mL) was heated at 100 °C. After 18h, the mixture was warmed to room temperature and diluted with H<sub>2</sub>O (10 mL). The aqueous layer was extracted with DCM (2 × 10 mL). The combined organic layer was dried over anhydrous Na<sub>2</sub>SO<sub>4</sub>, filtered, and the solvent was removed in vacuo to afford the corresponding amine (**7**) as yellow oil (82 mg, 68% yield over 2 steps).

The hydrochloride salts were isolated by adding 4N HCL (in dioxane) to the solution of corresponding amine in DCM (2 ml). After 15 minutes, the mixture was diluted with Et<sub>2</sub>O (15 ml), precipitated solid was filtered then dried under vacuum to provide the corresponding product as off white solid (94 mg, 68% yield over 2 steps).

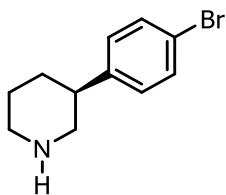

**(7): <sup>1</sup>H NMR** (500 MHz, CDCl<sub>3</sub>): δ (ppm) 7.36 – 7.29 (m, 2H), 7.06 – 6.97 (m, 2H), 3.04 (t, *J* = 11.8 Hz, 2H), 2.59 – 2.48 (m, 3H), 1.93 – 1.82 (m, 1H), 1.71 (dt, *J* = 9.1, 2.5 Hz, 1H), 1.65 – 1.41 (m, 3H). [ $\alpha$ ]<sup>25</sup><sub>D</sub> = +8.7 (*c* = 1.0, CH<sub>3</sub>OH). The spectroscopic data satisfactorily matched previously reported data.<sup>7,8</sup>

**(7.HCl): <sup>1</sup>H NMR** (500 MHz, CDCl<sub>3</sub>): δ (ppm) 9.77 (d, *J* = 99.8 Hz, 1H), 7.44 (d, *J* = 8.3 Hz, 2H), 7.06 (d, *J* = 8.3 Hz, 2H), 3.50 (q, *J* = 13.8, 13.3 Hz, 2H), 3.23 (t, *J* = 12.3 Hz, 1H), 2.86 (q, *J* = 11.8 Hz, 2H), 2.25 – 1.93 (m, 4H), 1.67 – 1.55 (m, 1H). **<sup>13</sup>C NMR** (126 MHz, CDCl<sub>3</sub>) δ 139.76, 132.18, 128.74, 121.52, 49.14, 43.97, 39.13, 30.25, 22.65. [ $\alpha$ ]<sup>25</sup><sub>D</sub> = +4.3 (*c* = 1.0, CH<sub>3</sub>OH).

**HRMS** (ESI): *m/z* calcd for C<sub>11</sub>H<sub>15</sub>BrN<sup>+</sup> [M + H]<sup>+</sup> 240.0382 found 240.0392.

**IR** ( $\nu_{\max}$ /cm<sup>-1</sup>) 2933, 2856, 2361, 1697, 1490, 1468, 1438, 1257, 1237, 1202, 1137, 1076, 1010, 982, 818, 769, 818, 754, 717, 691.

## 5. References

- (1) Kohari, Y.; Okuyama, Y.; Kwon, E.; Furuyama, T.; Kobayashi, N.; Otuki, T.; Kumagai, J.; Seki, C.; Uwai, K.; Dai, G.; Iwasa, T.; Nakano, H. Enantioselective Diels-Alder Reaction of 1,2-Dihydropyridines with Aldehydes Using  $\beta$ -Amino Alcohol Organocatalyst. *J. Org. Chem.* **2014**, *79* (20), 9500–9511.
- (2) Krow, G. R.; Huang, Q.; Szczepanski, S. W.; Hausheer, F. H.; Carroll, P. J. Stereoselectivity in Diels-Alder Reactions of Diene-Substituted N-Alkoxy carbonyl-1,2-Dihydropyridines. *J. Org. Chem.* **2007**, *72* (9), 3458–3466.
- (3) Heusler, A.; Fliege, J.; Wagener, T.; Glorius, F. Substituted Dihydropyridine Synthesis by Dearomatization of Pyridines. *Angew. Chemie Int. Ed.* **2021**, *60* (25), 13793–13797.
- (4) Colpaert, F.; Mangelinckx, S.; De Kimpe, N. Asymmetric Synthesis of Chiral N -Sulfinyl 3-Alkyl- and 3-Arylpiperidines by  $\alpha$ -Alkylation of N -Sulfinyl Imidates with 1-Chloro-3-Iodopropane. *J. Org. Chem.* **2011**, *76* (1), 234–244.
- (5) Amat, M.; Cantó, M.; Llor, N.; Escolano, C.; Molins, E.; Espinosa, E.; Bosch, J. Dynamic Kinetic Resolution of Racemic  $\gamma$ -Aryl- $\delta$ -Oxoesters. Enantioselective Synthesis of 3-Arylpiperidines. *J. Org. Chem.* **2002**, *67* (15), 5343–5351.
- (6) Zhang, S. J.; Sun, W. W.; Yu, Q. Y.; Cao, P.; Dong, X. P.; Wu, B. Stereoselective Synthesis of (–)-3-PPP through Palladium-Catalysed Unactivated C(Sp<sup>3</sup>)–H Arylation at the C-3 Position of l-Pipecolinic Acid. *Tetrahedron Lett.* **2017**, *58* (7), 606–609.
- (7) Wallace, D. J.; Baxter, C. A.; Brands, K. J. M.; Bremeyer, N.; Brewer, S. E.; Desmond, R.; Emerson, K. M.; Foley, J.; Fernandez, P.; Hu, W.; Keen, S. P.; Mullens, P.; Muzzio, D.; Sajonz, P.; Tan, L.; Wilson, R. D.; Zhou, G.; Zhou, G. Development of a Fit-for-Purpose Large-Scale Synthesis of an Oral PARP Inhibitor. *Org. Process Res. Dev.* **2011**, *15* (4), 831–840.
- (8) Chung, C. K.; Bulger, P. G.; Kosjek, B.; Belyk, K. M.; Rivera, N.; Scott, M. E.; Humphrey, G. R.; Limanto, J.; Bachert, D. C.; Emerson, K. M. Process Development of C-N Cross-Coupling and Enantioselective Biocatalytic Reactions for the Asymmetric Synthesis of Niraparib. *Org. Process Res. Dev.* **2014**, *18* (1), 215–227.

## 6. NMR Spectra

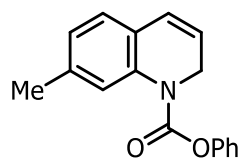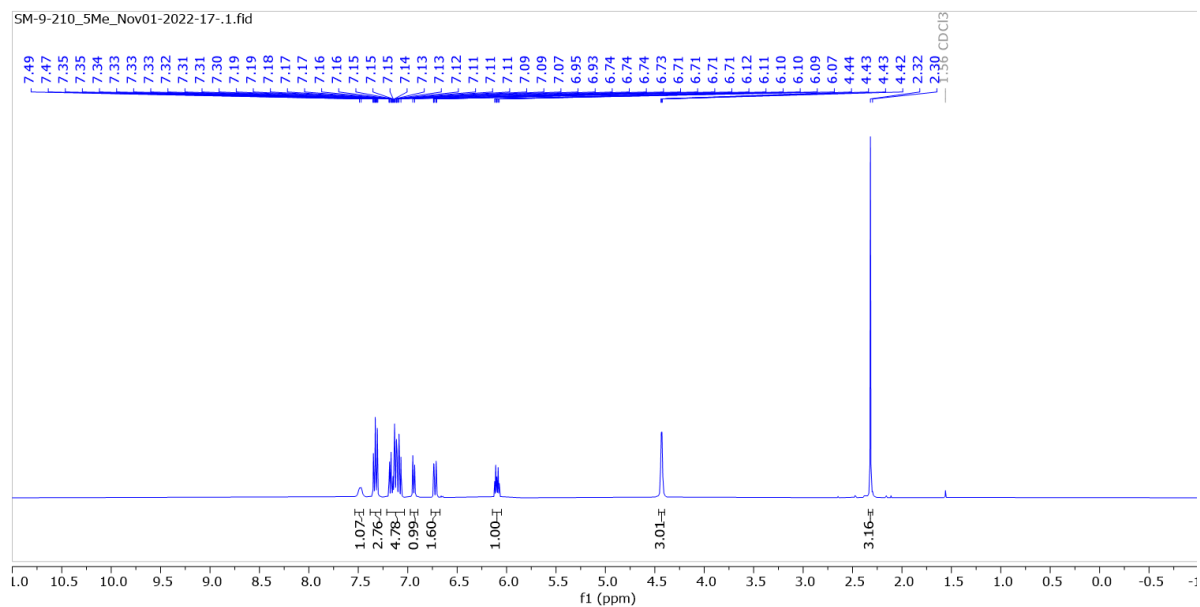

<sup>1</sup>H NMR (400 MHz, CDCl<sub>3</sub>) of **S10**

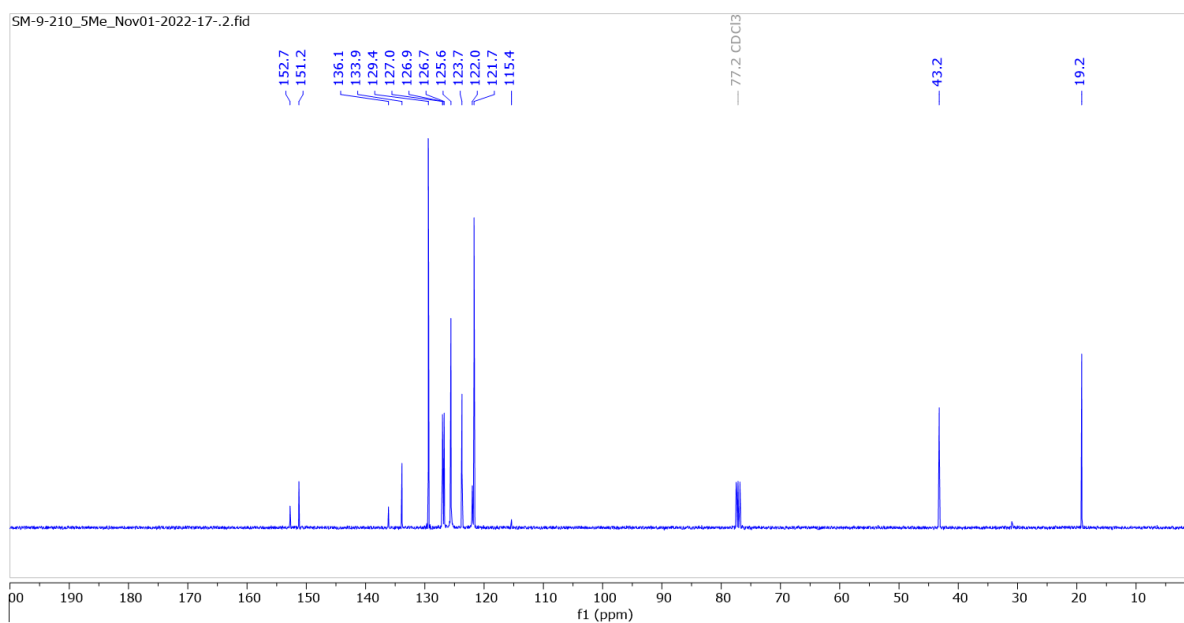

<sup>13</sup>C NMR (101 MHz, CDCl<sub>3</sub>) of **S10**

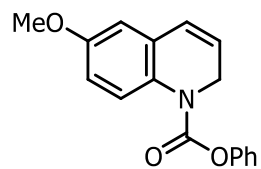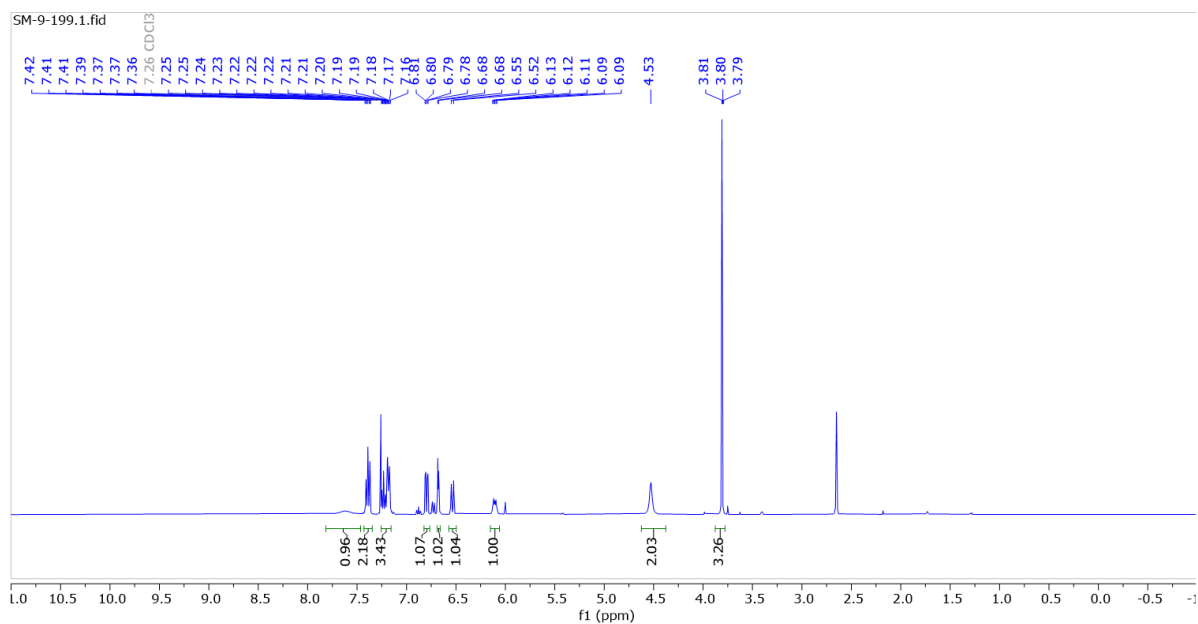

<sup>1</sup>H NMR (400 MHz, CDCl<sub>3</sub>) of **S11**

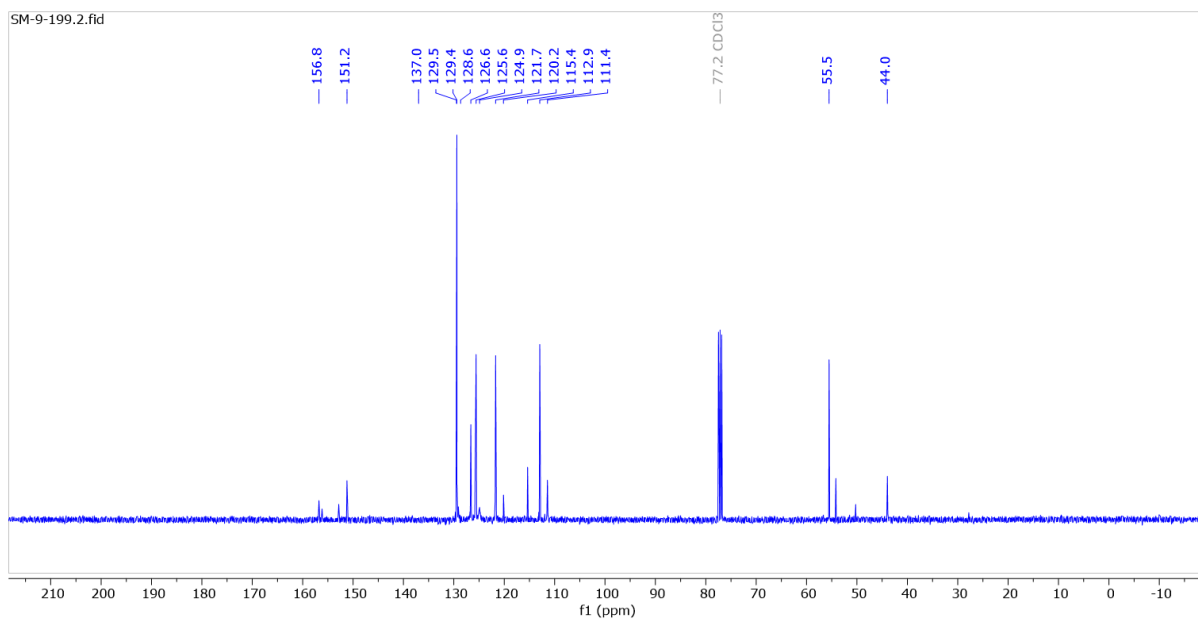

<sup>13</sup>C NMR (101 MHz, CDCl<sub>3</sub>) of **S11**

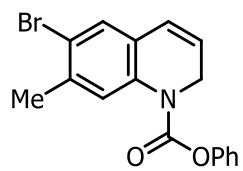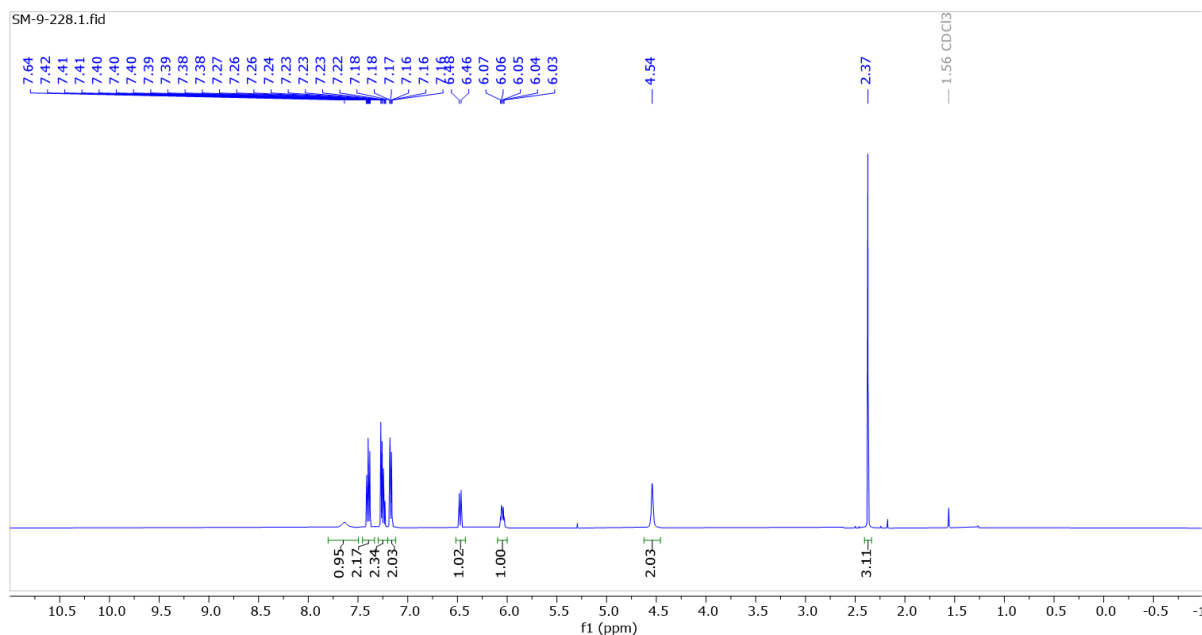

<sup>1</sup>H NMR (400 MHz, CDCl<sub>3</sub>) of **S12**

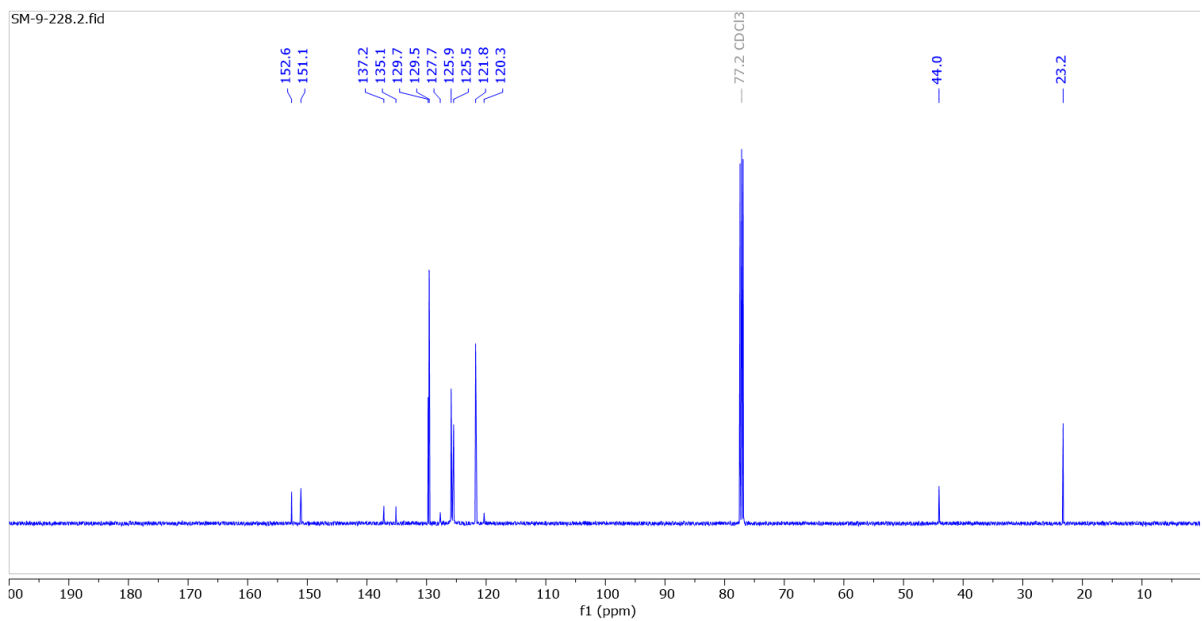

<sup>13</sup>C NMR (101 MHz, CDCl<sub>3</sub>) of **S12**

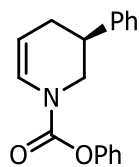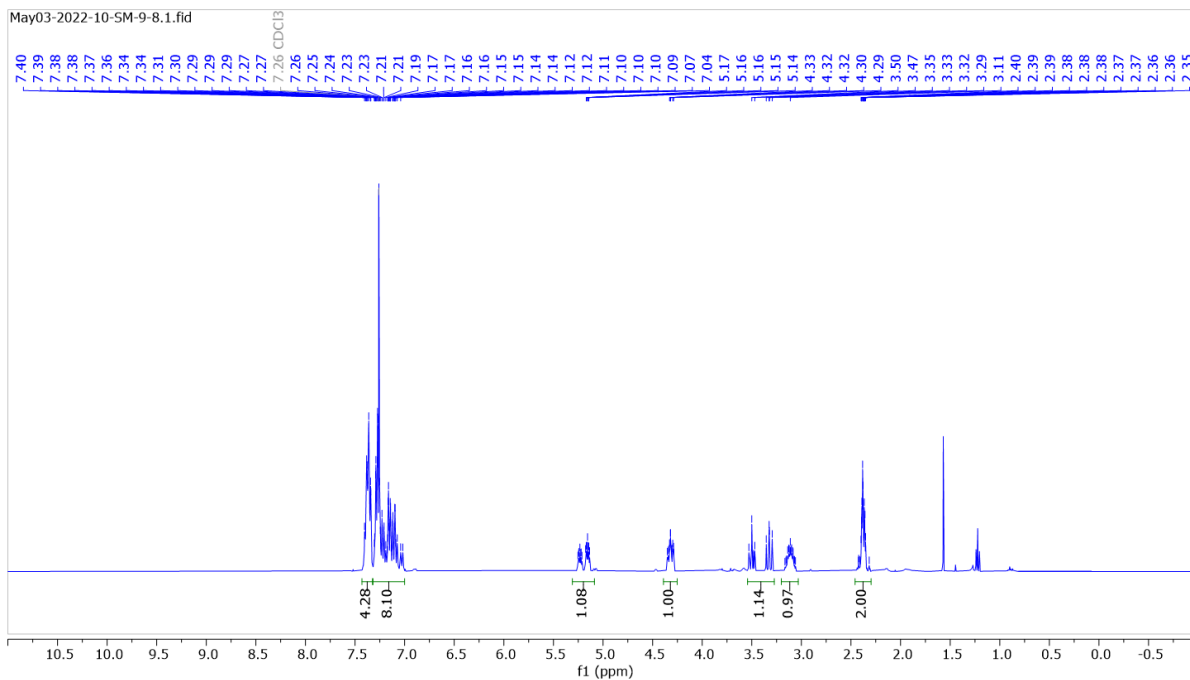

<sup>1</sup>H NMR (400 MHz, CDCl<sub>3</sub>) of **3a**

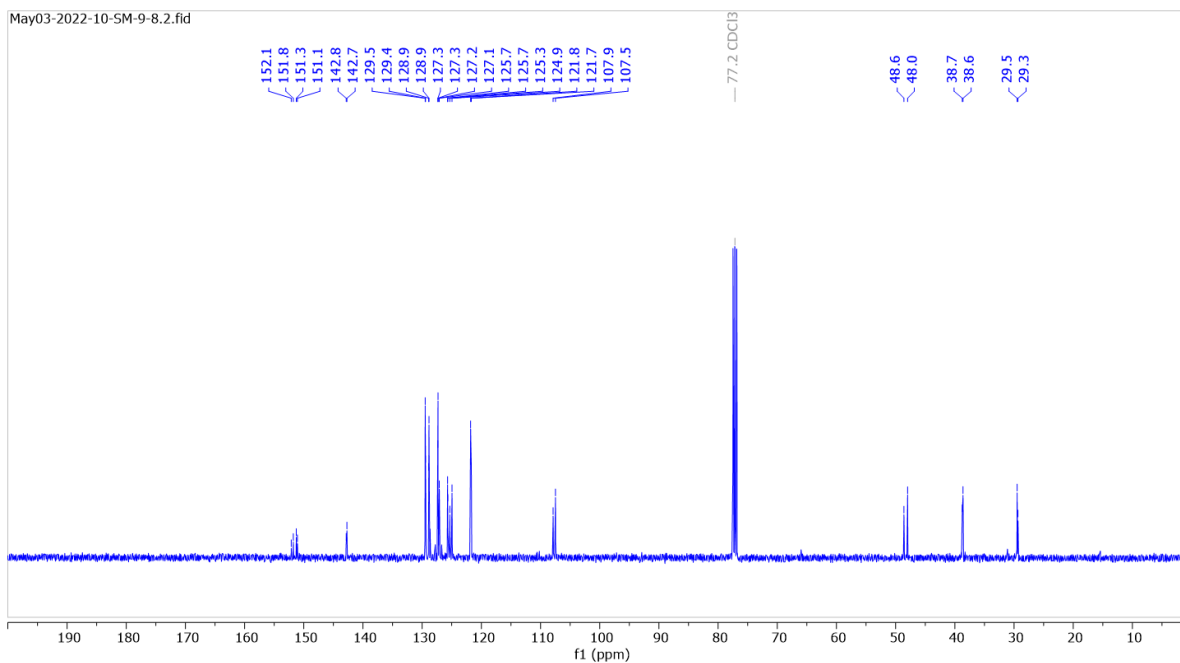

<sup>13</sup>C NMR (101 MHz, CDCl<sub>3</sub>) of **3a**

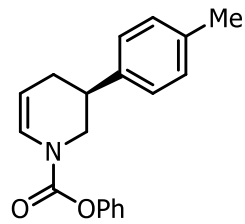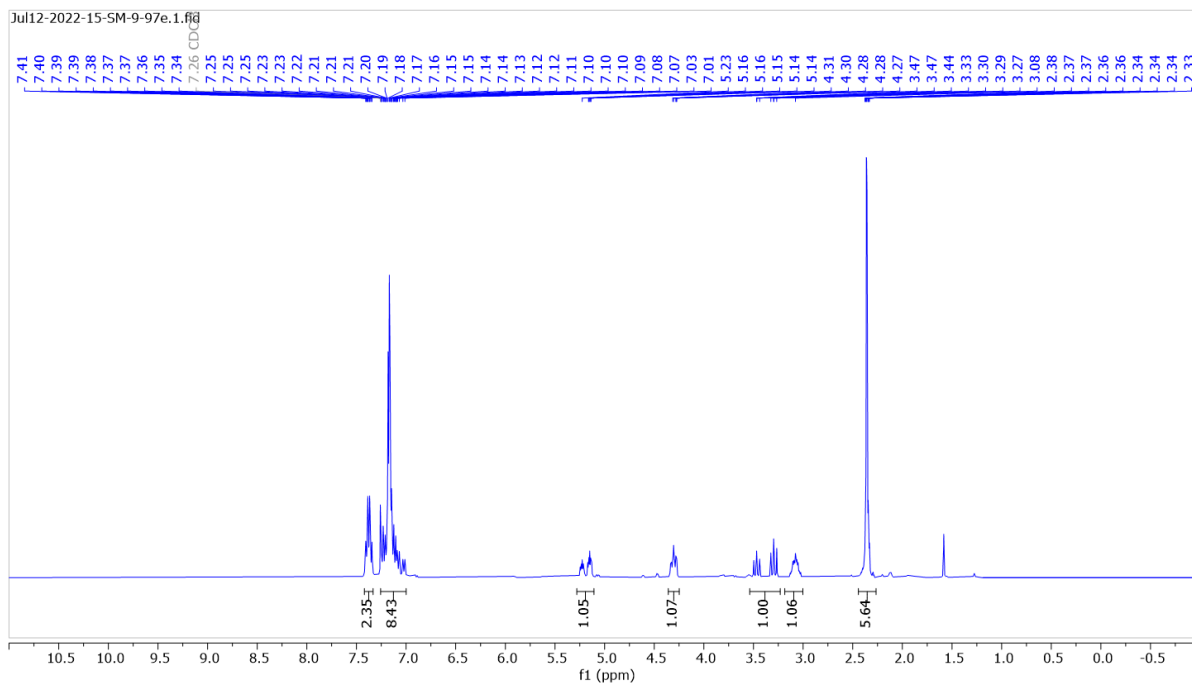

<sup>1</sup>H NMR (400 MHz, CDCl<sub>3</sub>) of **3b**

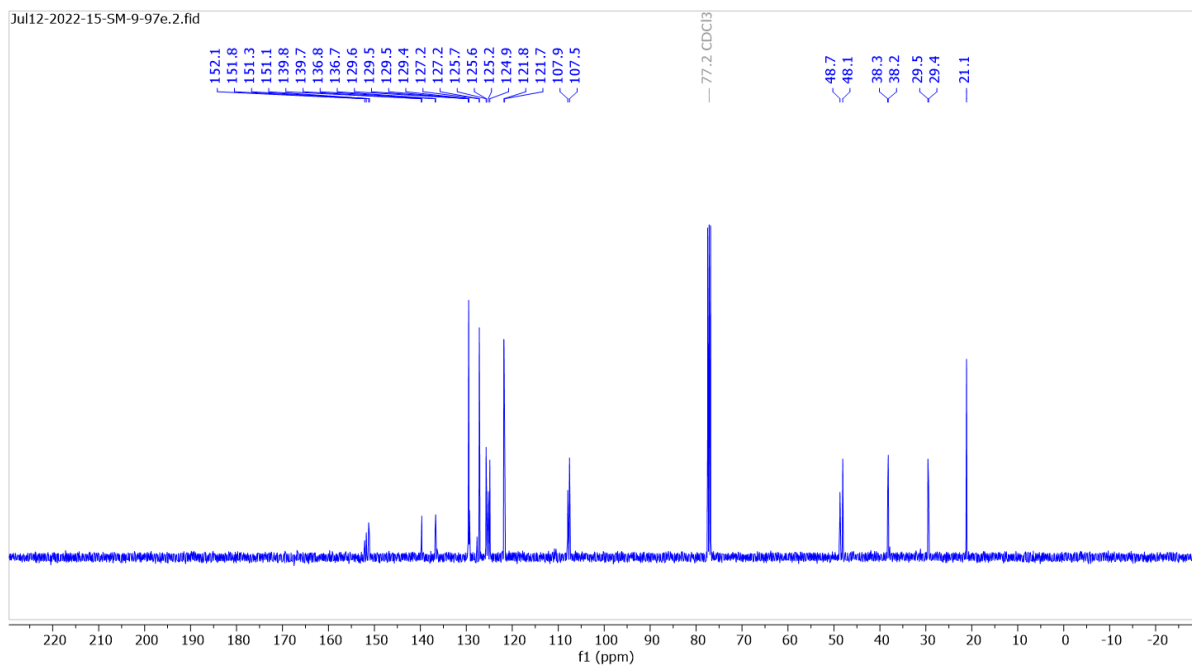

<sup>13</sup>C NMR (101 MHz, CDCl<sub>3</sub>) of **3b**



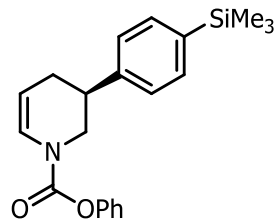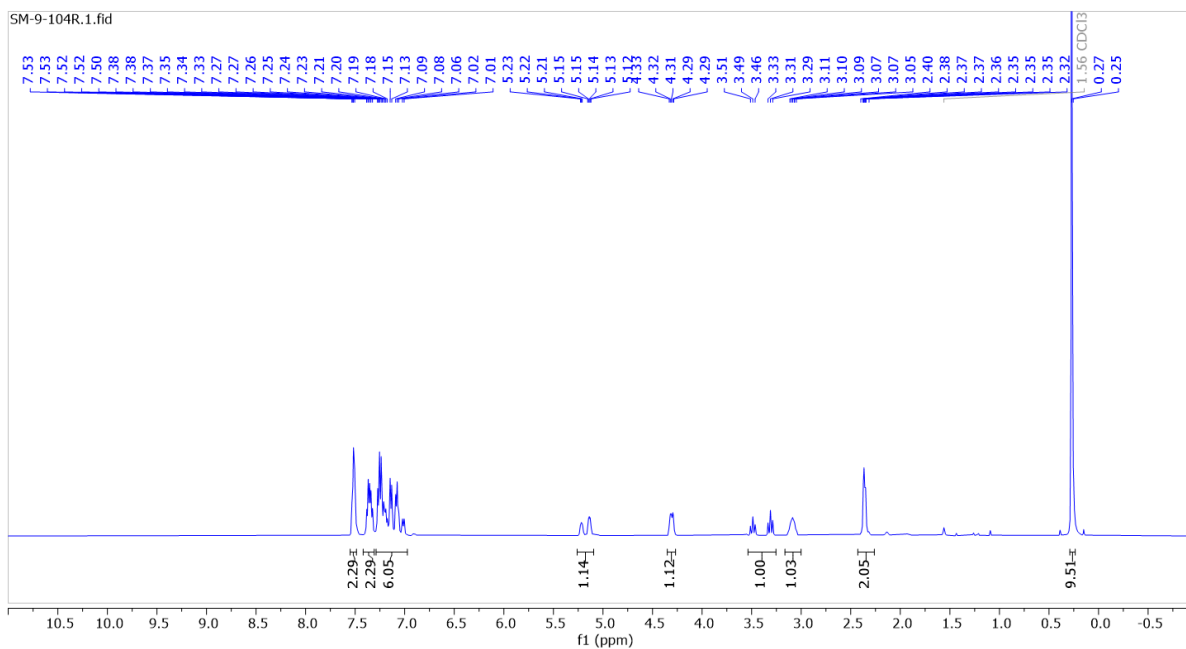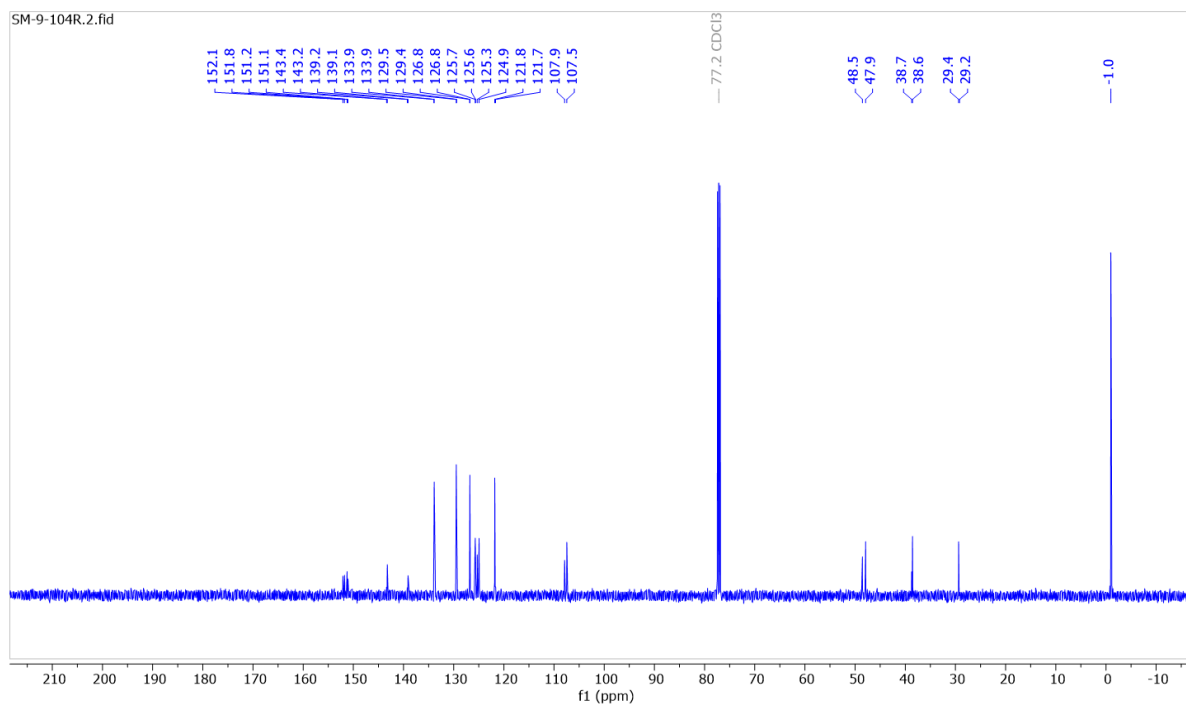

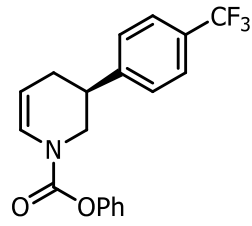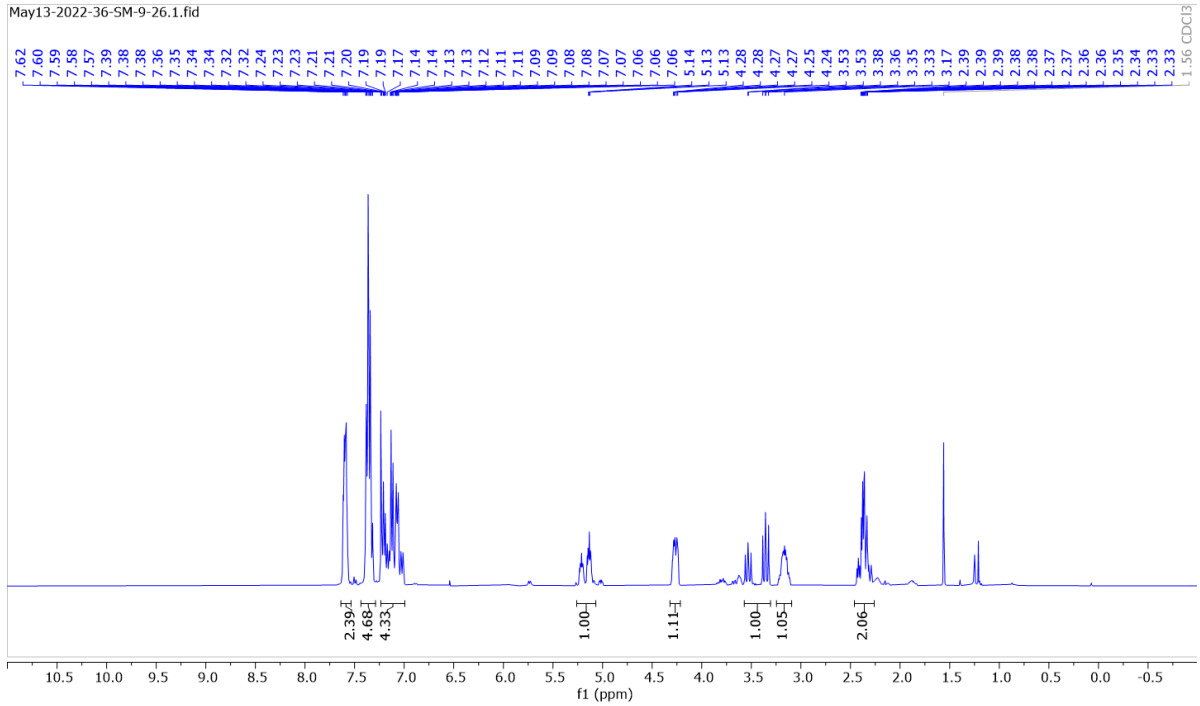

$^1\text{H NMR}$  (400 MHz,  $\text{CDCl}_3$ ) of **3d**

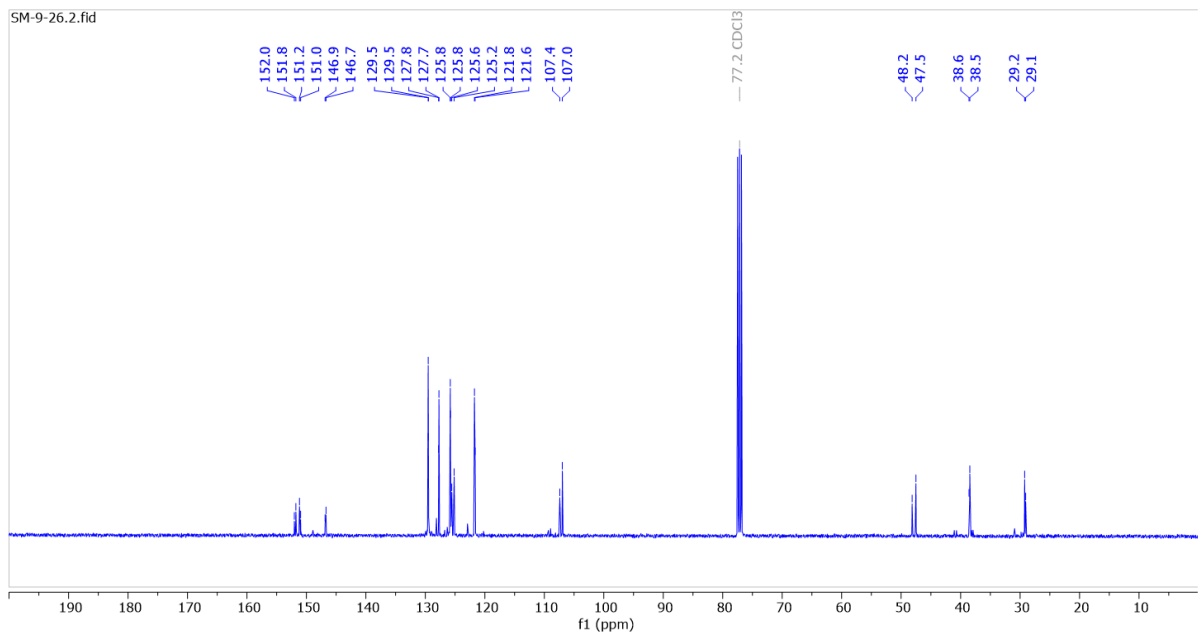

$^{13}\text{C NMR}$  (101 MHz,  $\text{CDCl}_3$ ) of **3d**

May13-2022-36-SM-9-26.2.fid

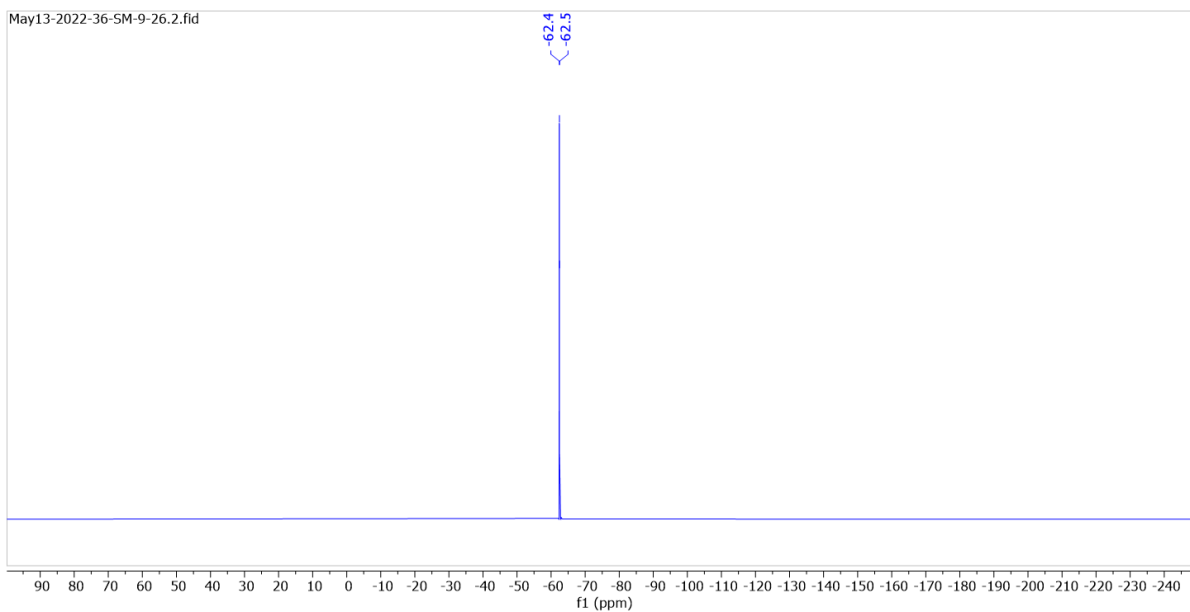

$^{19}\text{F}$  NMR (376 MHz,  $\text{CDCl}_3$ ) of **3d**

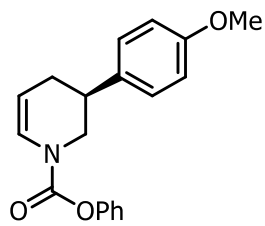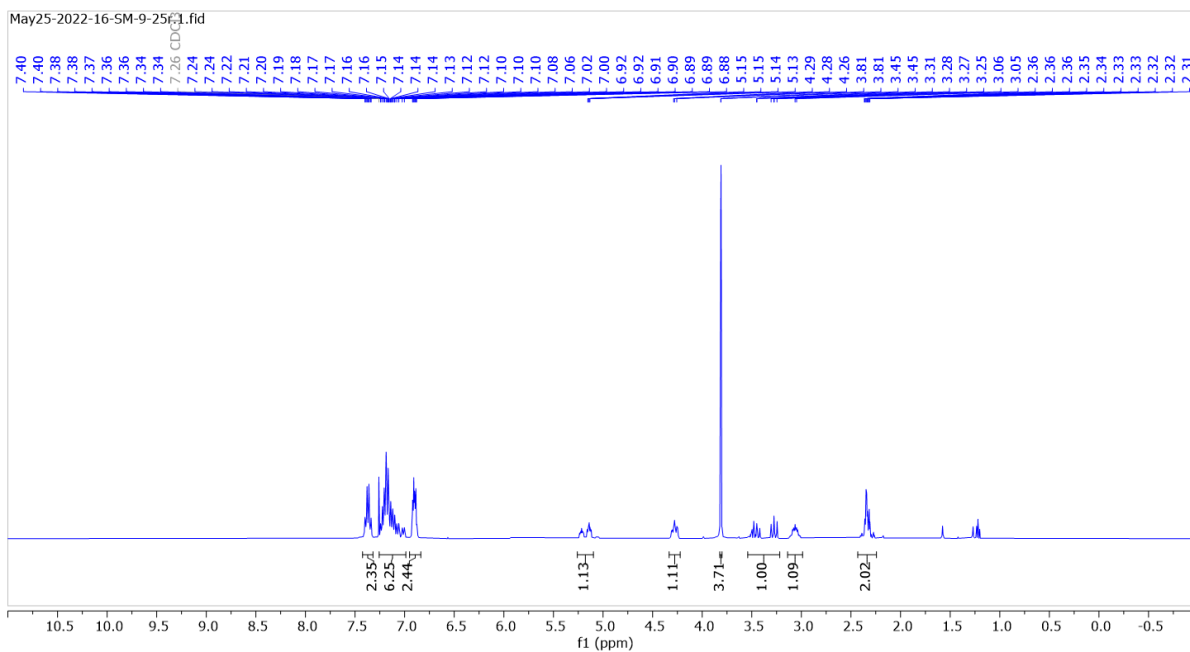

<sup>1</sup>H NMR (400 MHz, CDCl<sub>3</sub>) of 3e

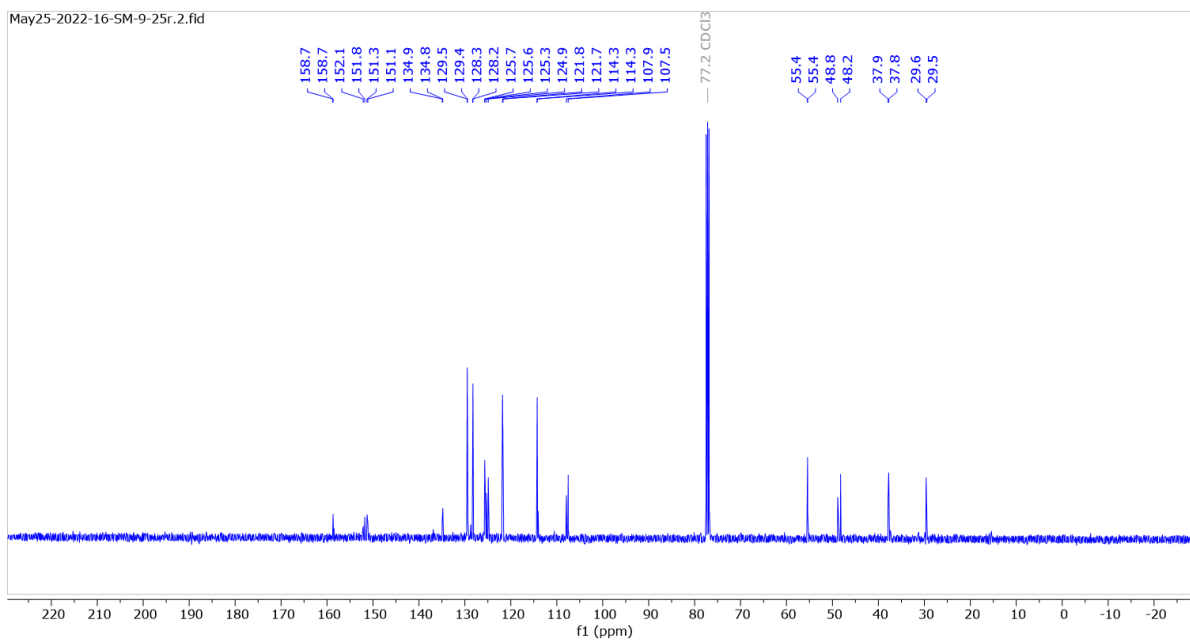

<sup>13</sup>C NMR (101 MHz, CDCl<sub>3</sub>) of 3e

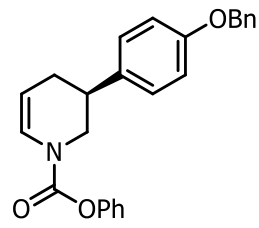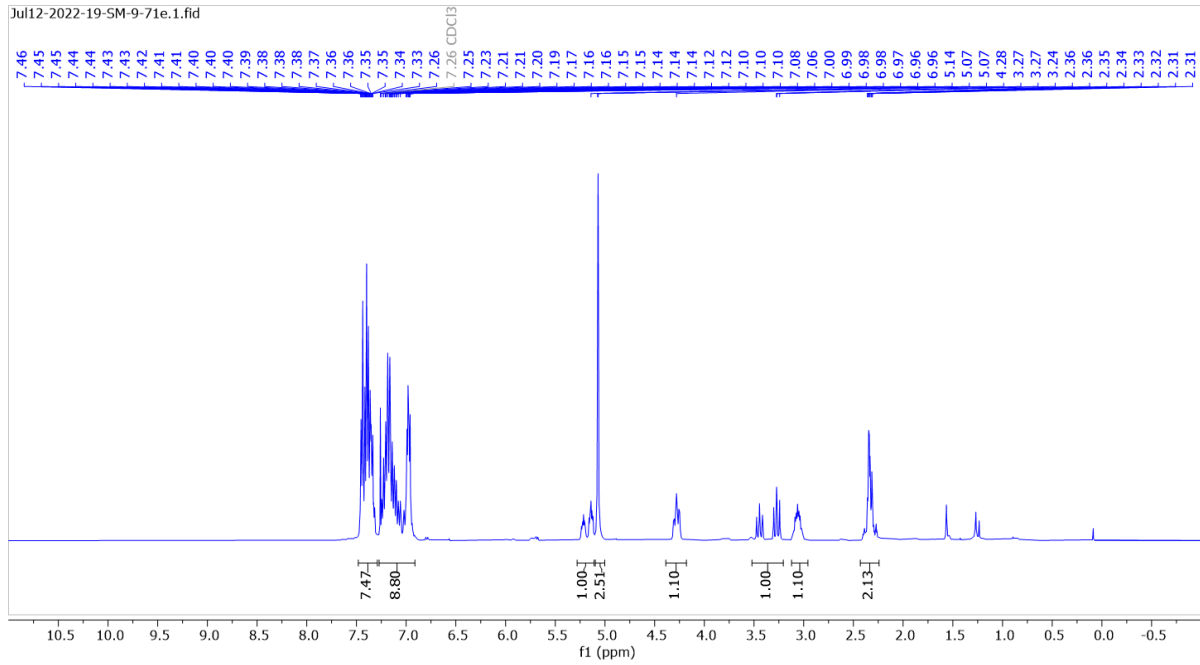

<sup>1</sup>H NMR (400 MHz, CDCl<sub>3</sub>) of **3f**

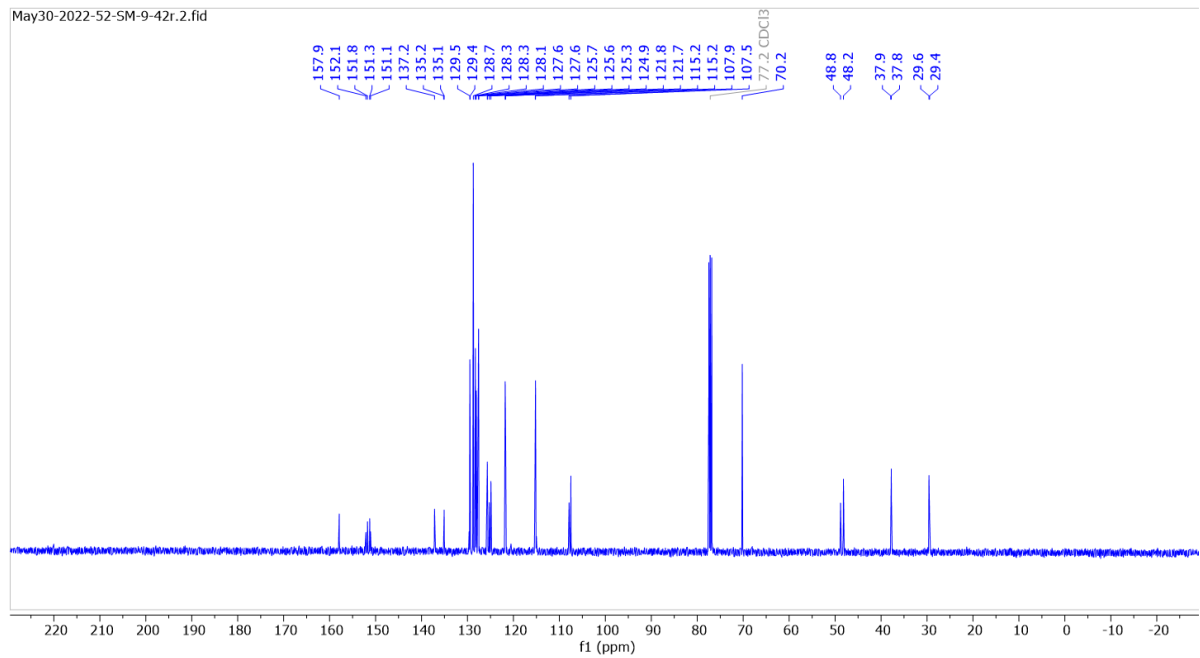

<sup>13</sup>C NMR (101 MHz, CDCl<sub>3</sub>) of **3f**

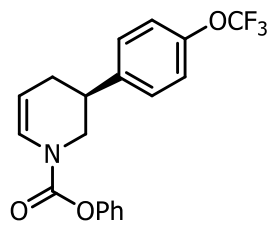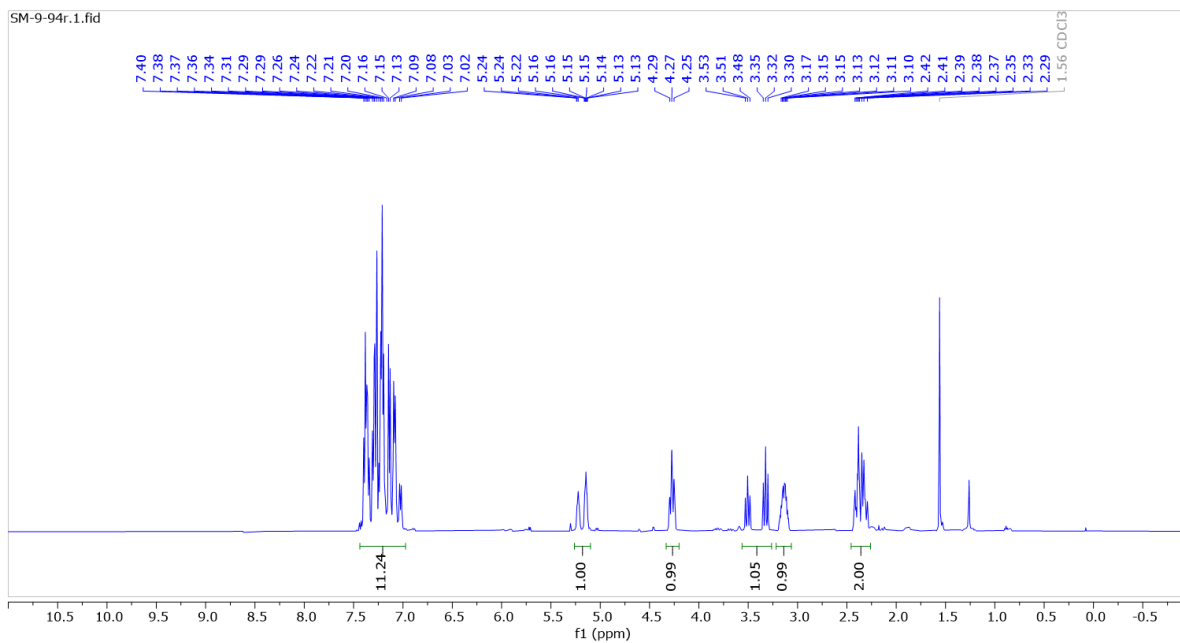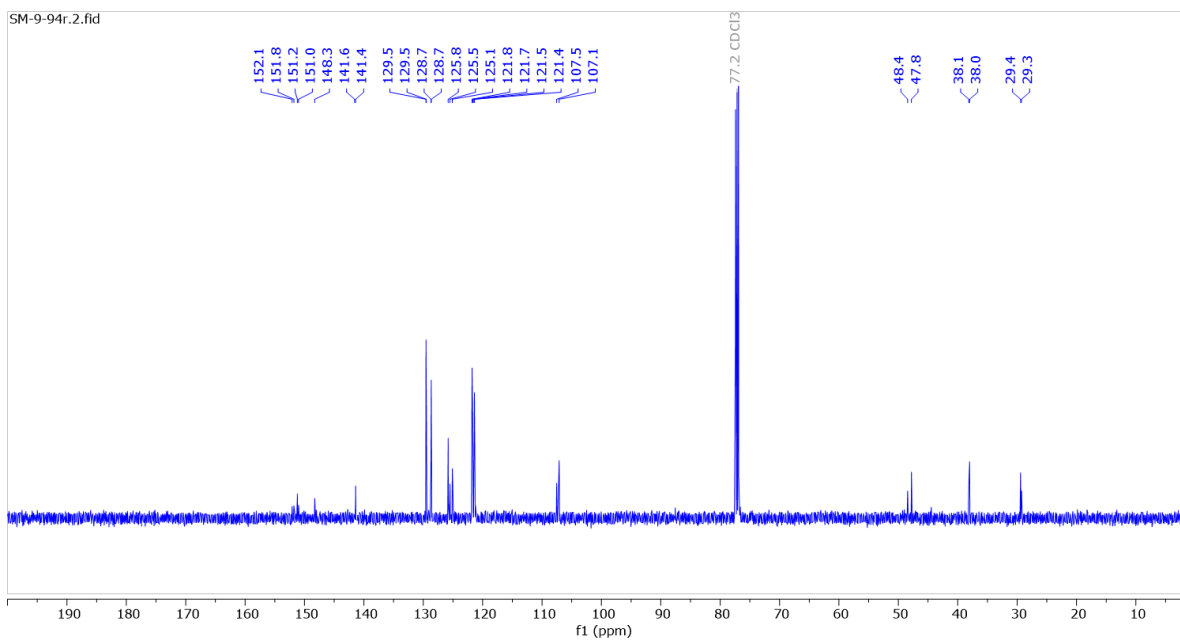

Jul20-2022-36-SM-9-94R.3.fid

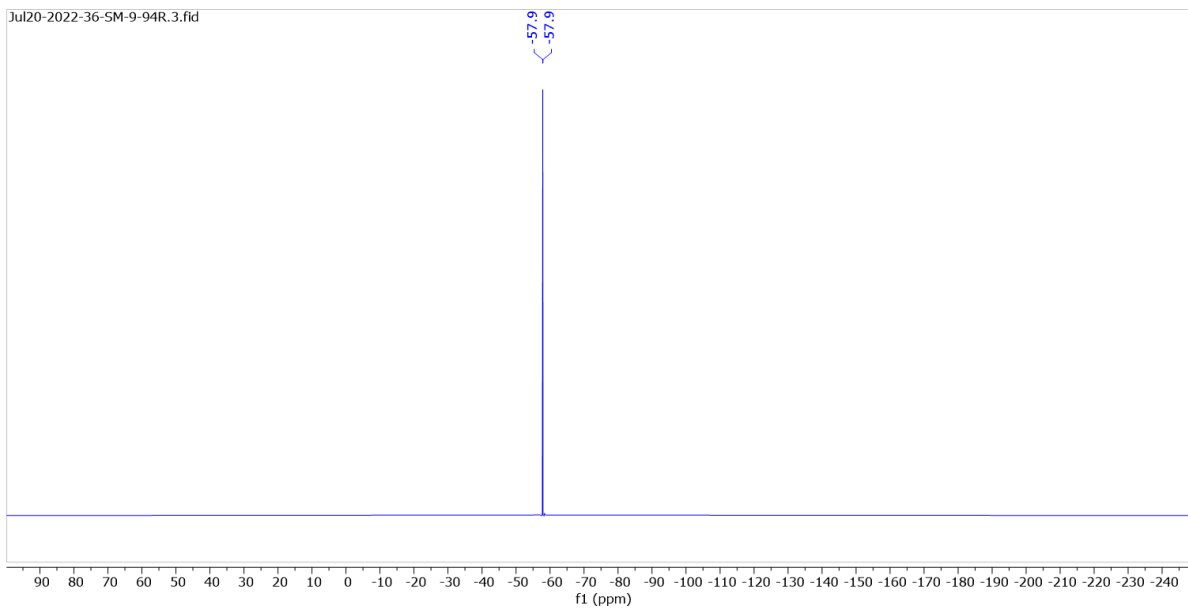

$^{19}\text{F}$  NMR (376 MHz,  $\text{CDCl}_3$ ) of **3g**

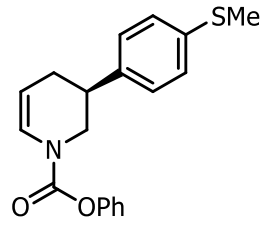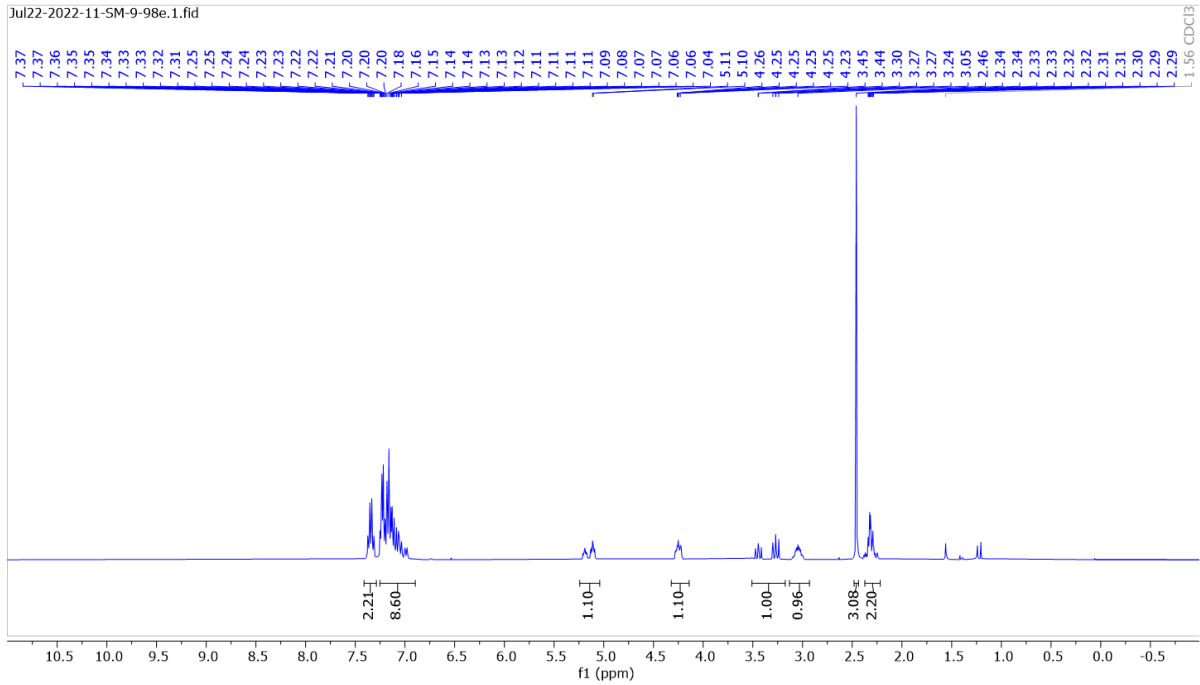

<sup>1</sup>H NMR (400 MHz, CDCl<sub>3</sub>) of 3h

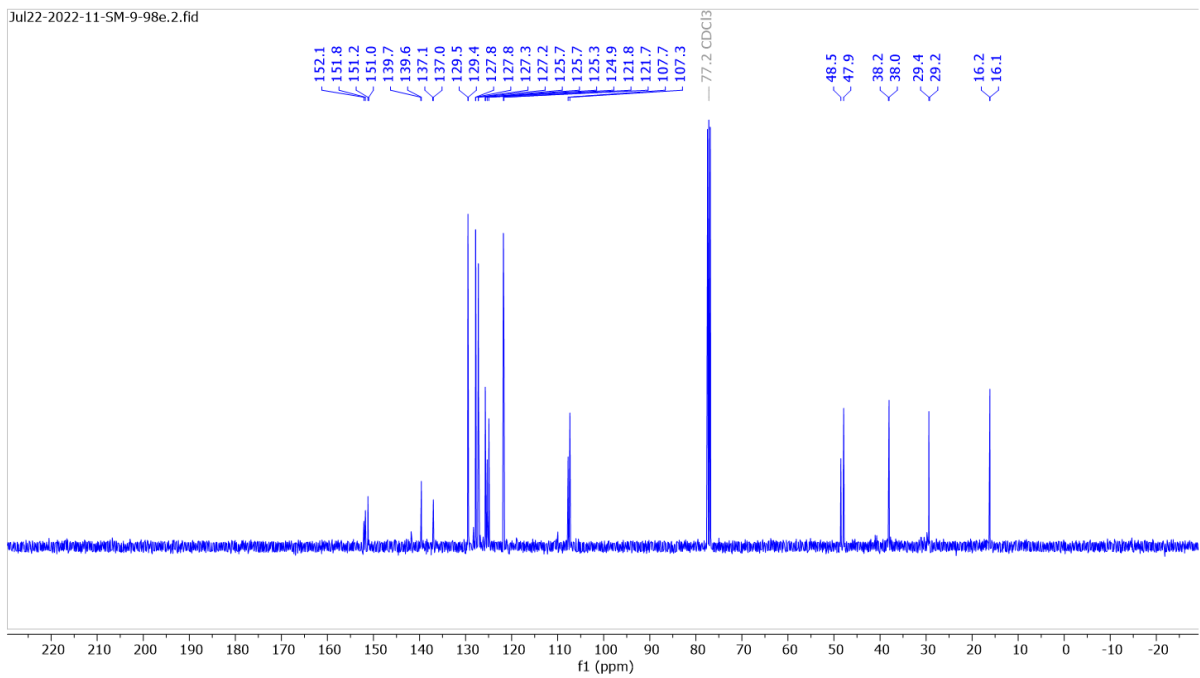

<sup>13</sup>C NMR (101 MHz, CDCl<sub>3</sub>) of 3h



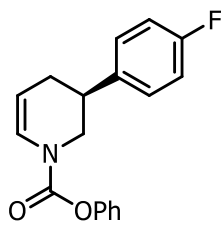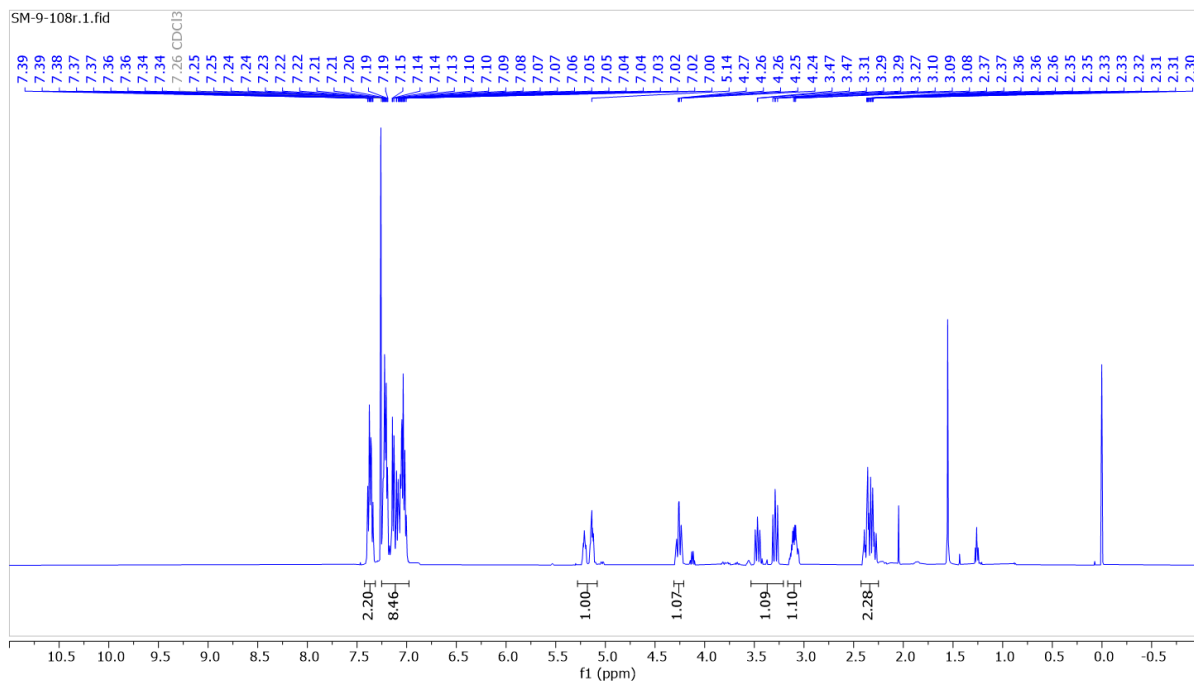

<sup>1</sup>H NMR (500 MHz, CDCl<sub>3</sub>) of **3i**

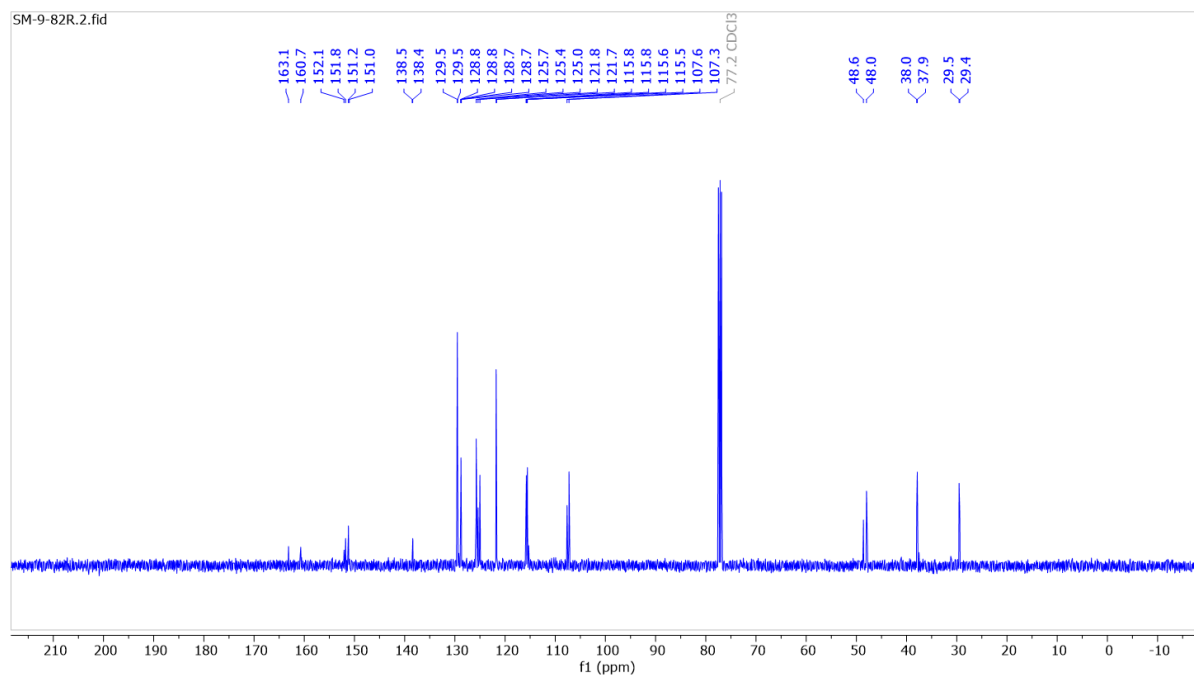

<sup>13</sup>C NMR (126 MHz, CDCl<sub>3</sub>) of **3i**

SM-9-108r.3.fid

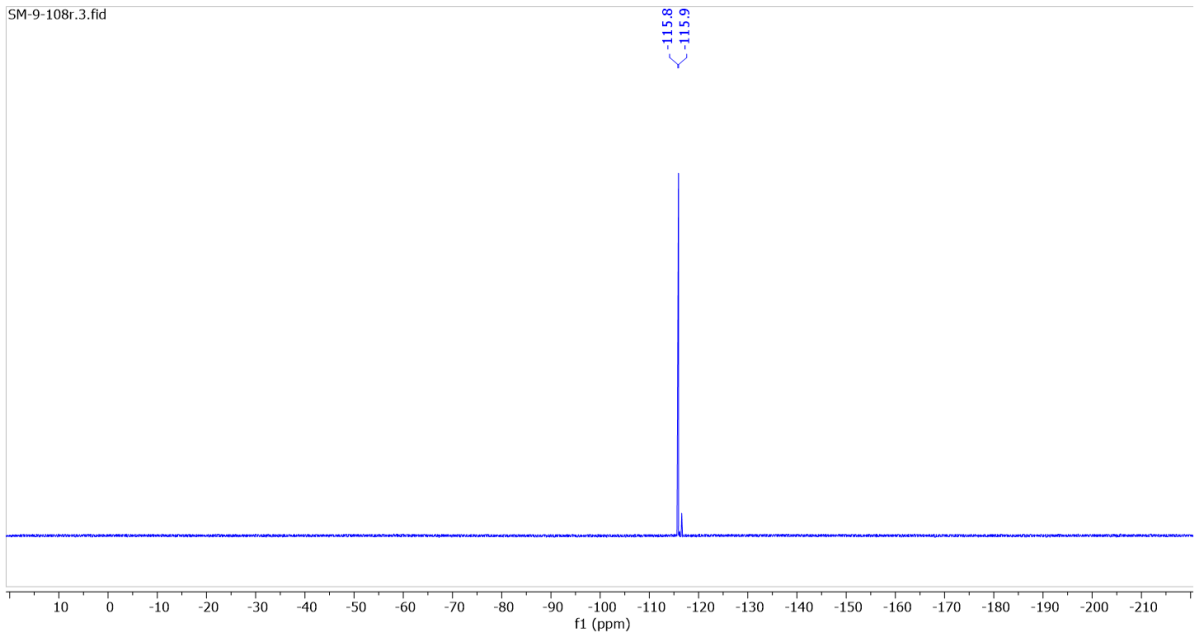

$^{19}\text{F}$  NMR (471 MHz,  $\text{CDCl}_3$ ) of **3i**

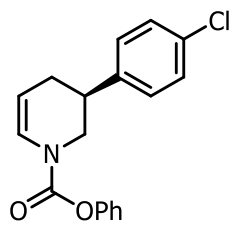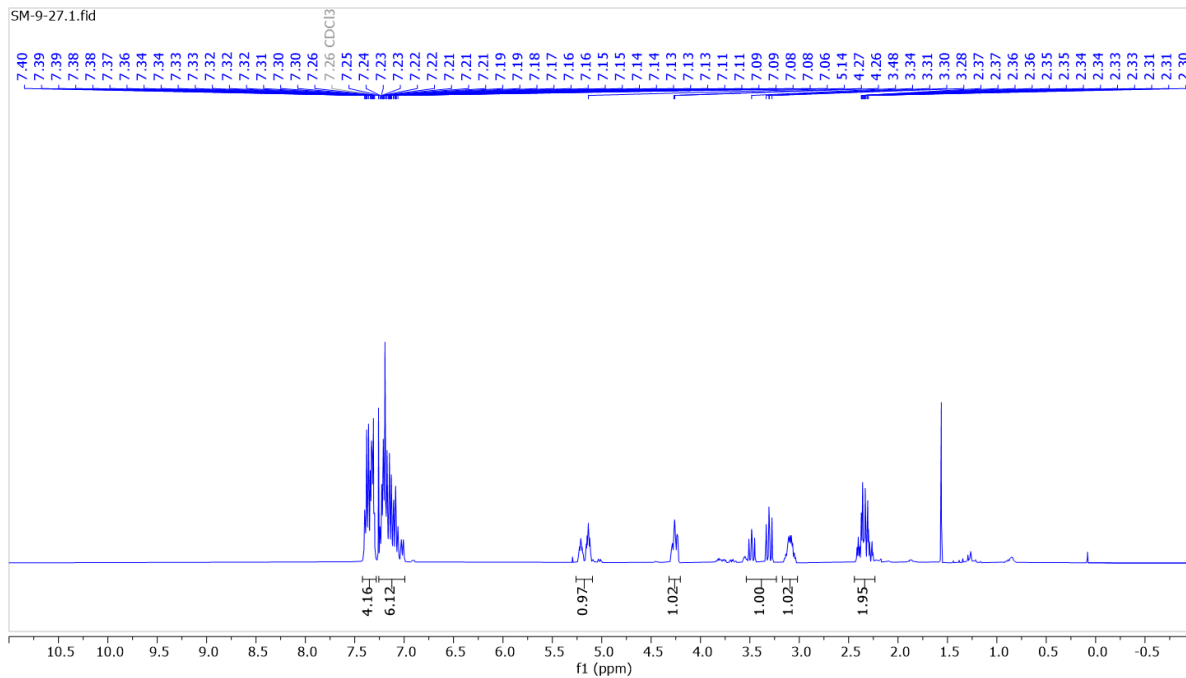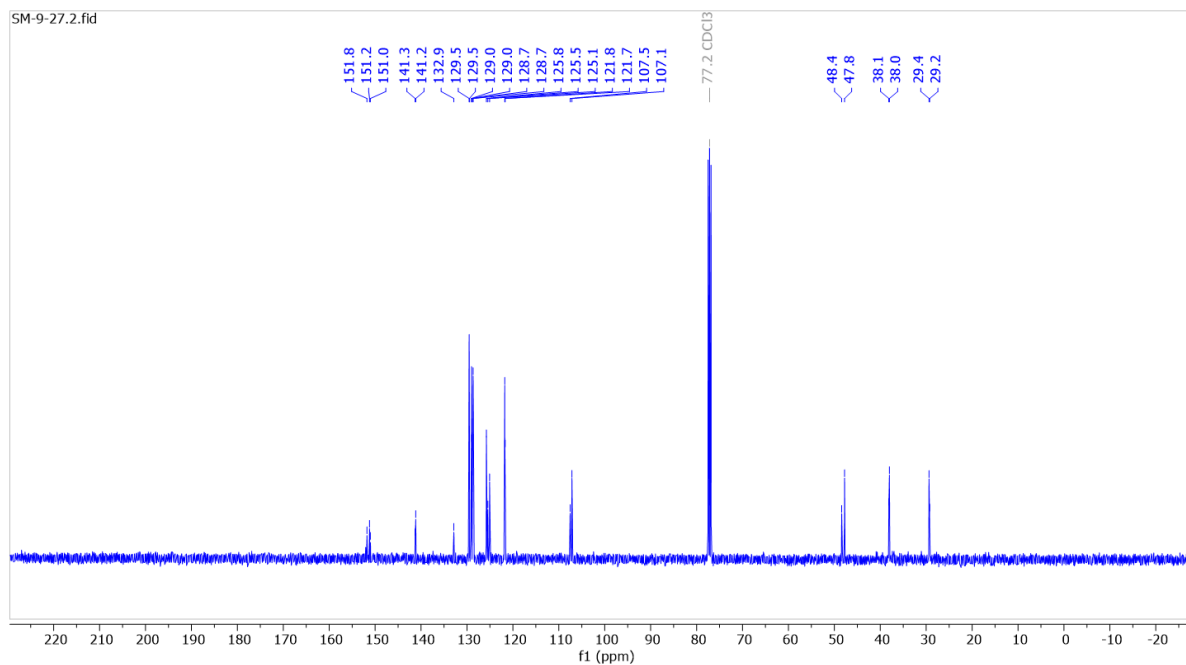

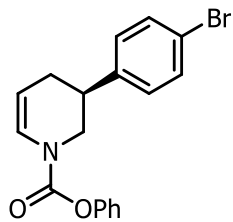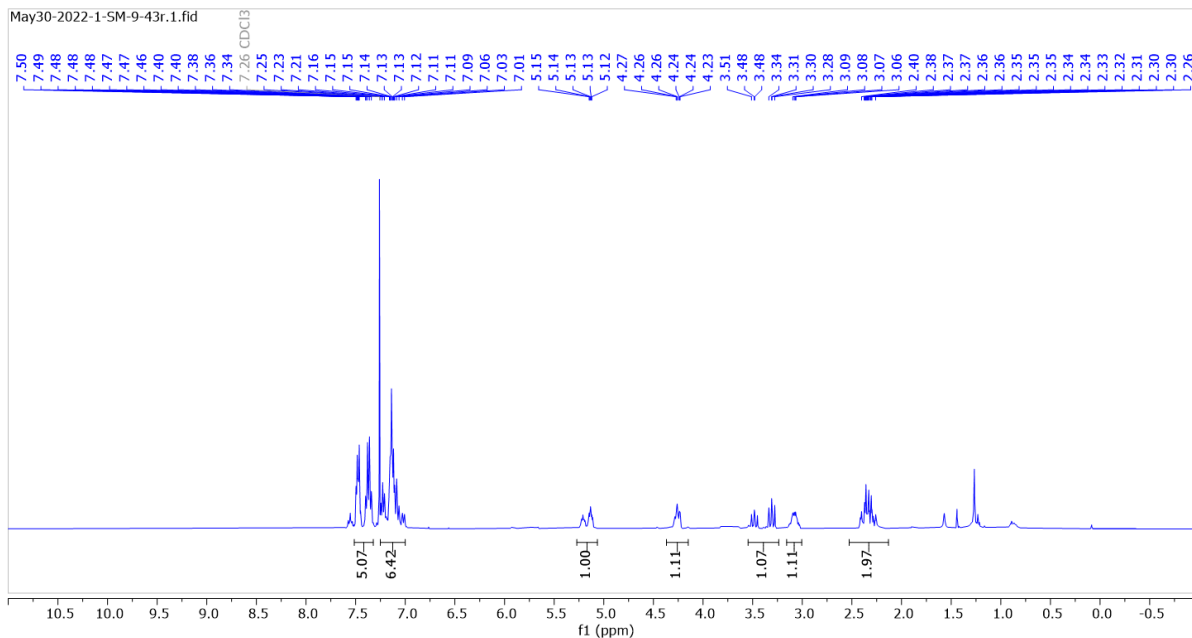

<sup>1</sup>H NMR (400 MHz, CDCl<sub>3</sub>) of **3k**

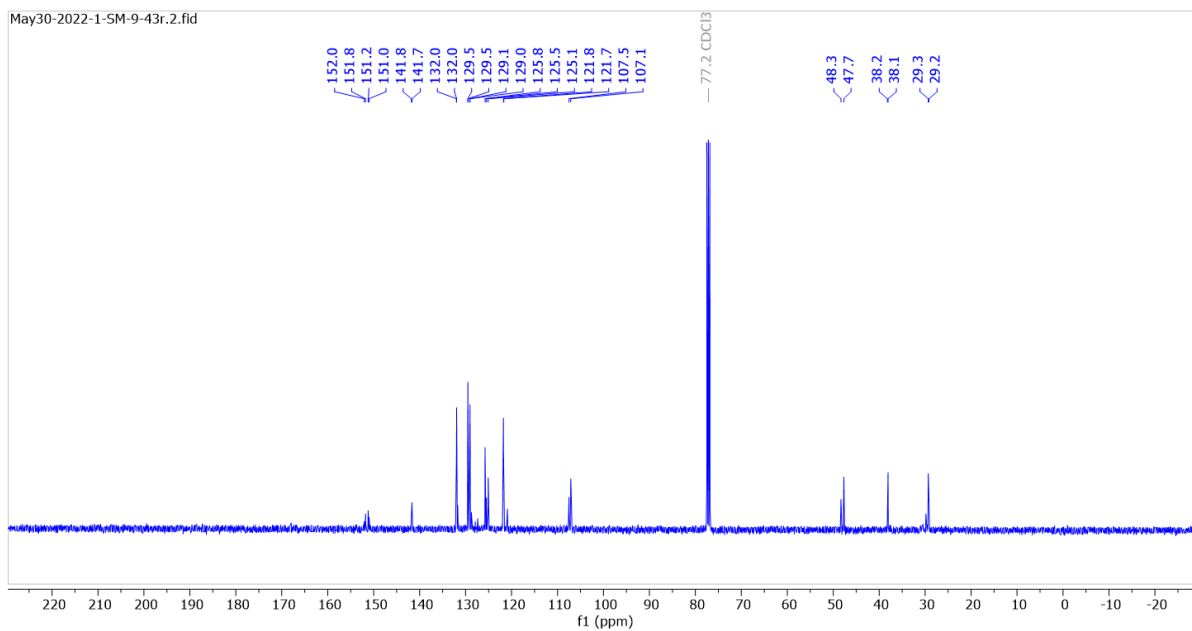

<sup>13</sup>C NMR (101 MHz, CDCl<sub>3</sub>) of **3k**

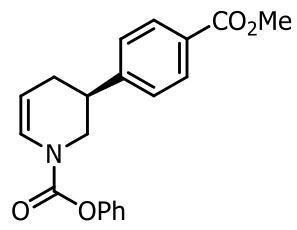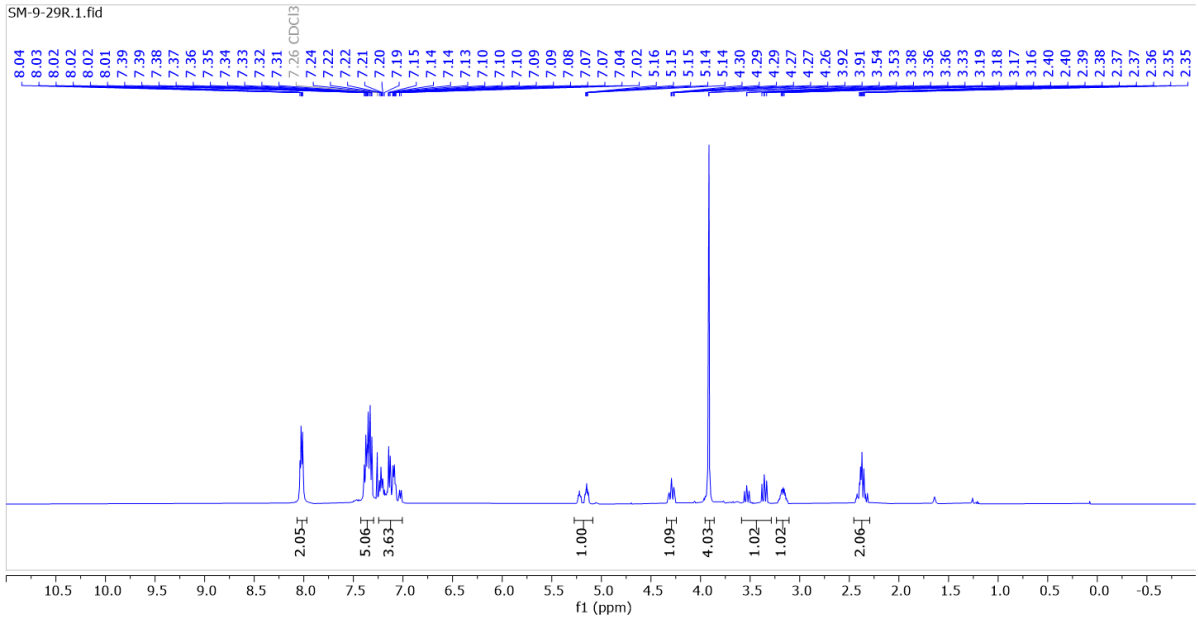

<sup>1</sup>H NMR (500 MHz, CDCl<sub>3</sub>) of **31**

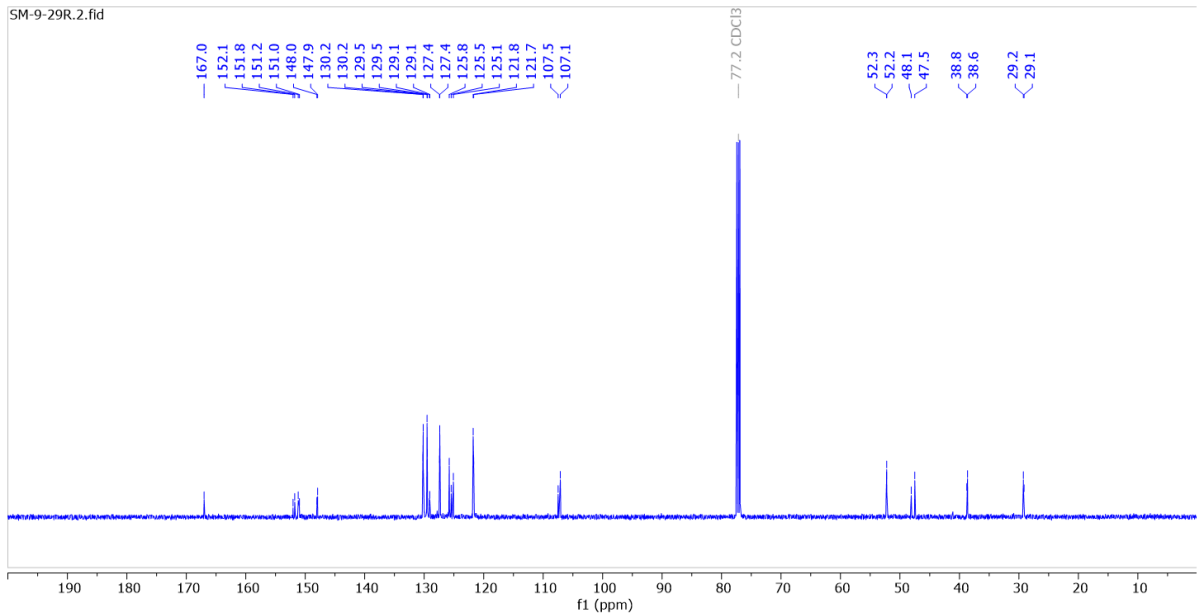

<sup>13</sup>C NMR (126 MHz, CDCl<sub>3</sub>) of **31**

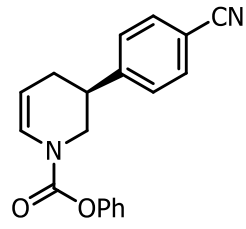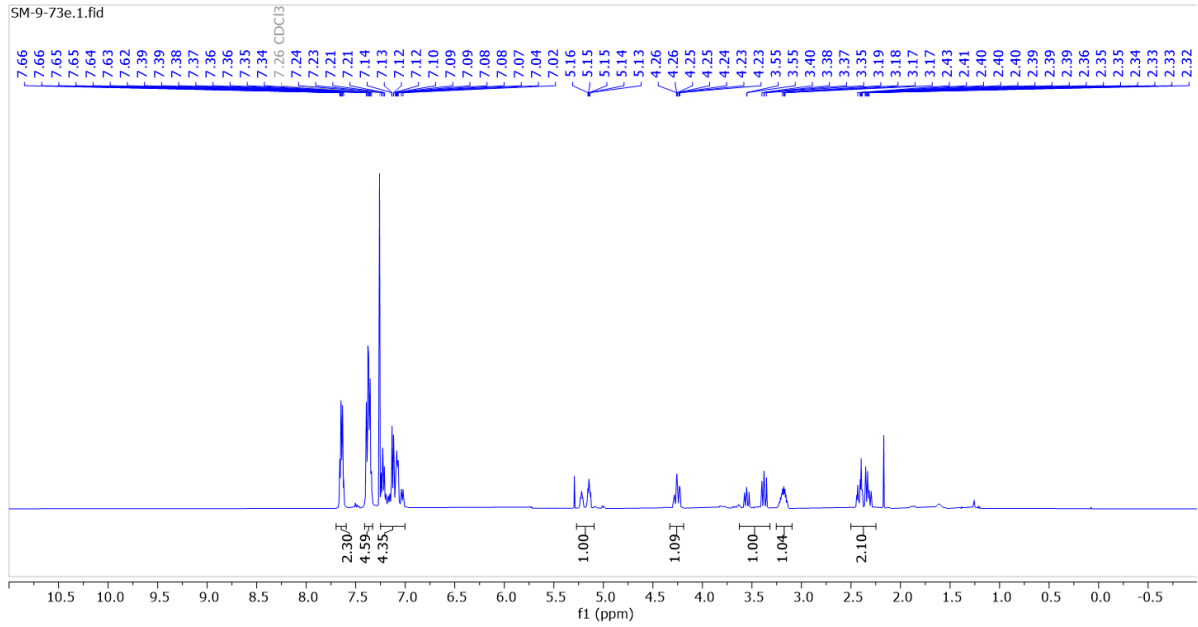

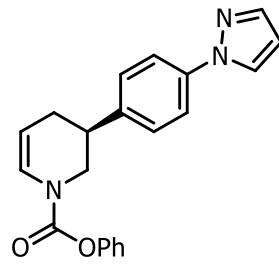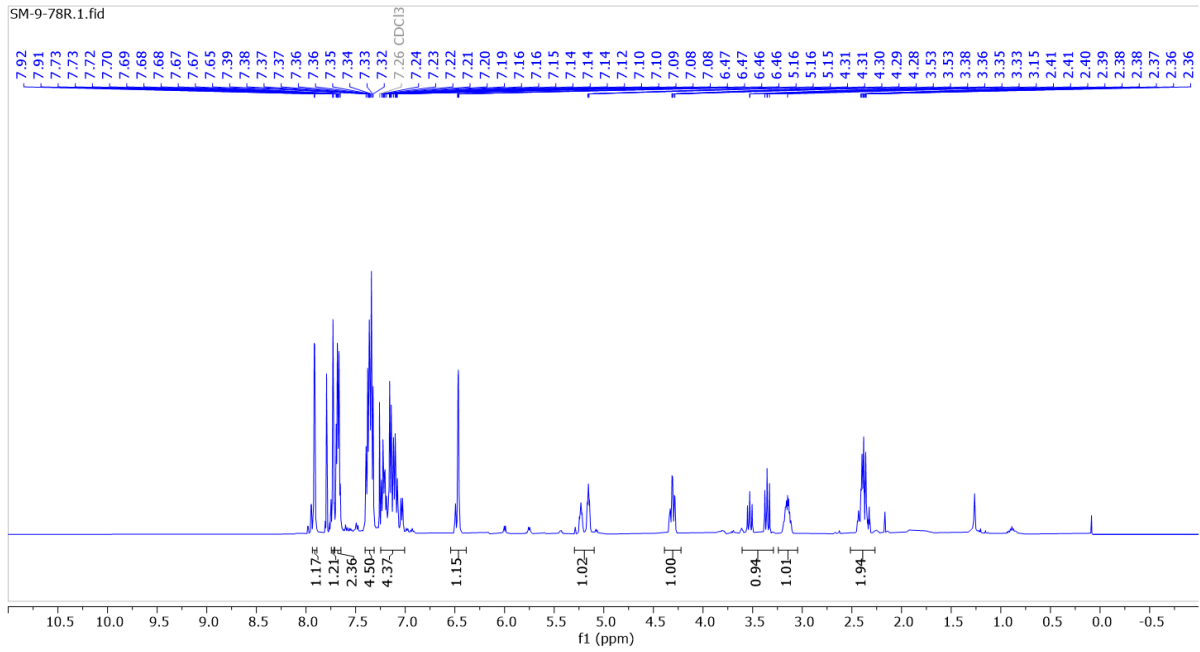

$^1\text{H}$  NMR (500 MHz,  $\text{CDCl}_3$ ) of **3n**

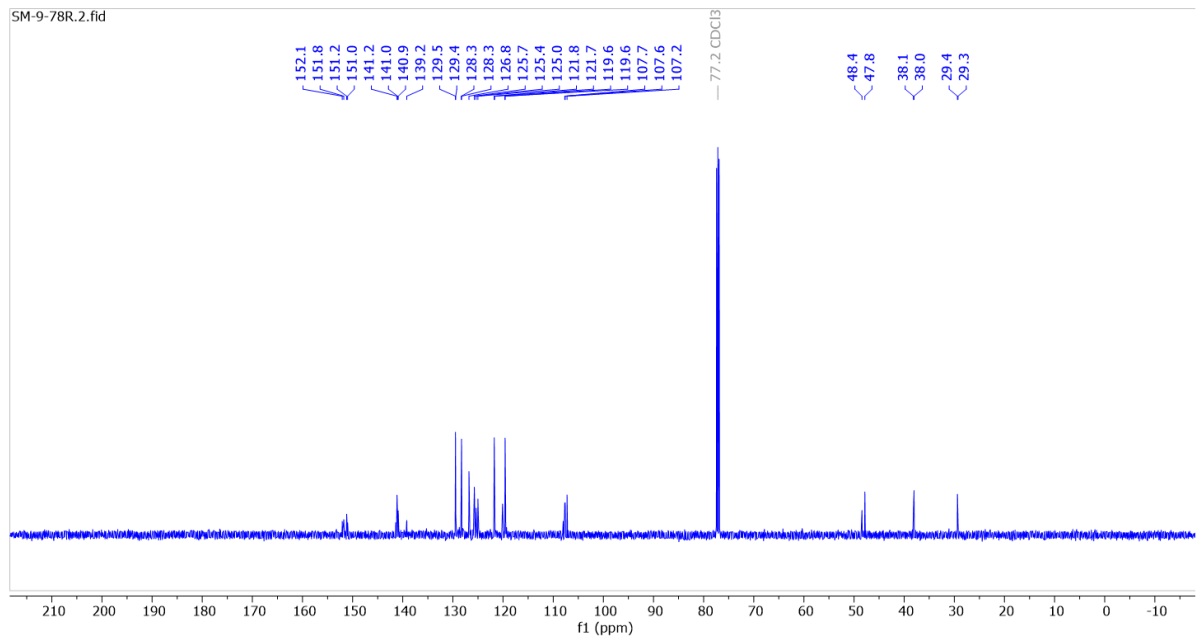

$^{13}\text{C}$  NMR (126 MHz,  $\text{CDCl}_3$ ) of **3n**

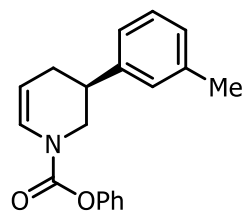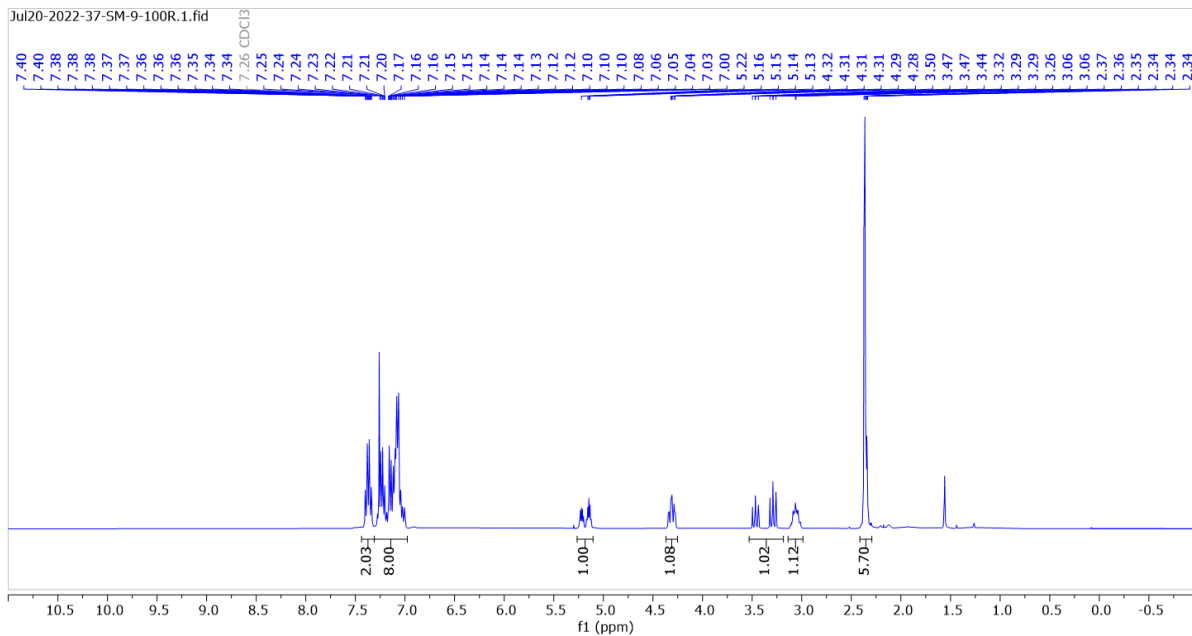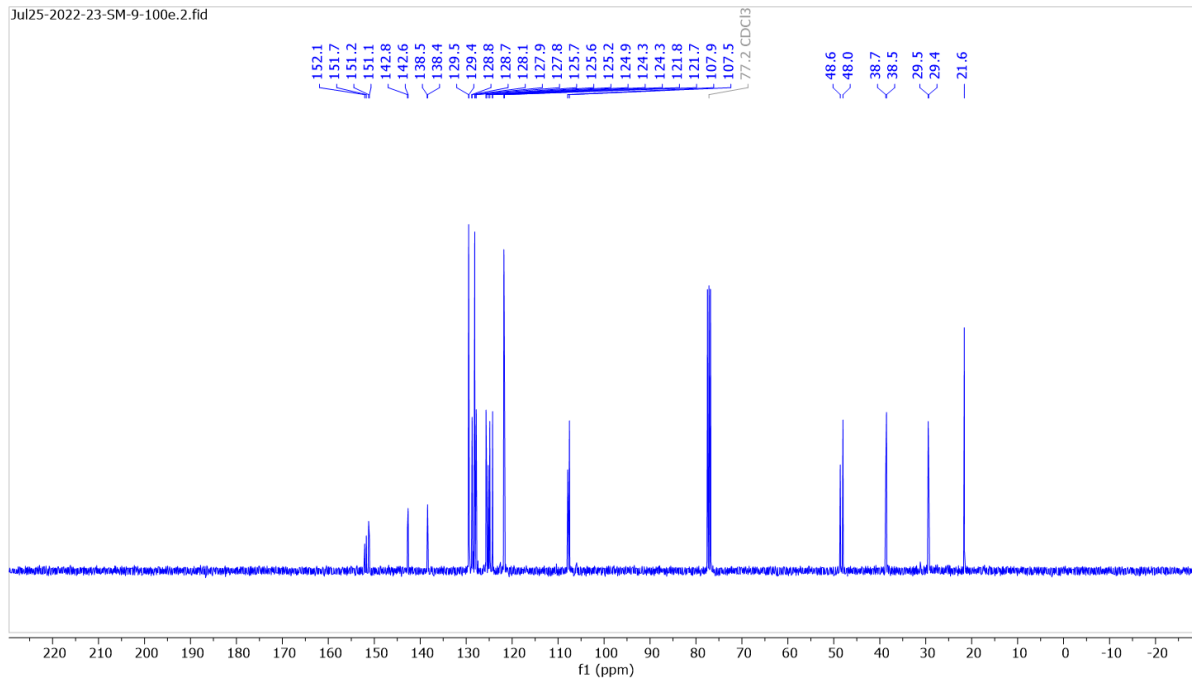



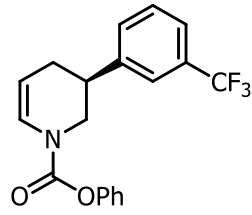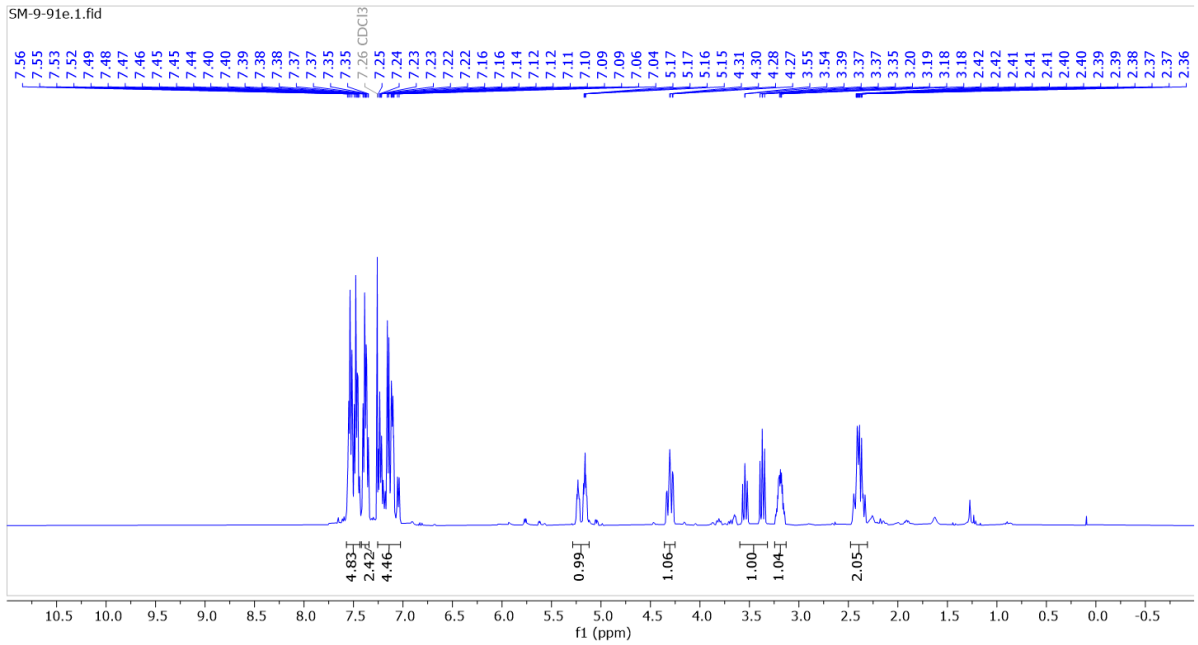

<sup>1</sup>H NMR (500 MHz, CDCl<sub>3</sub>) of 3p

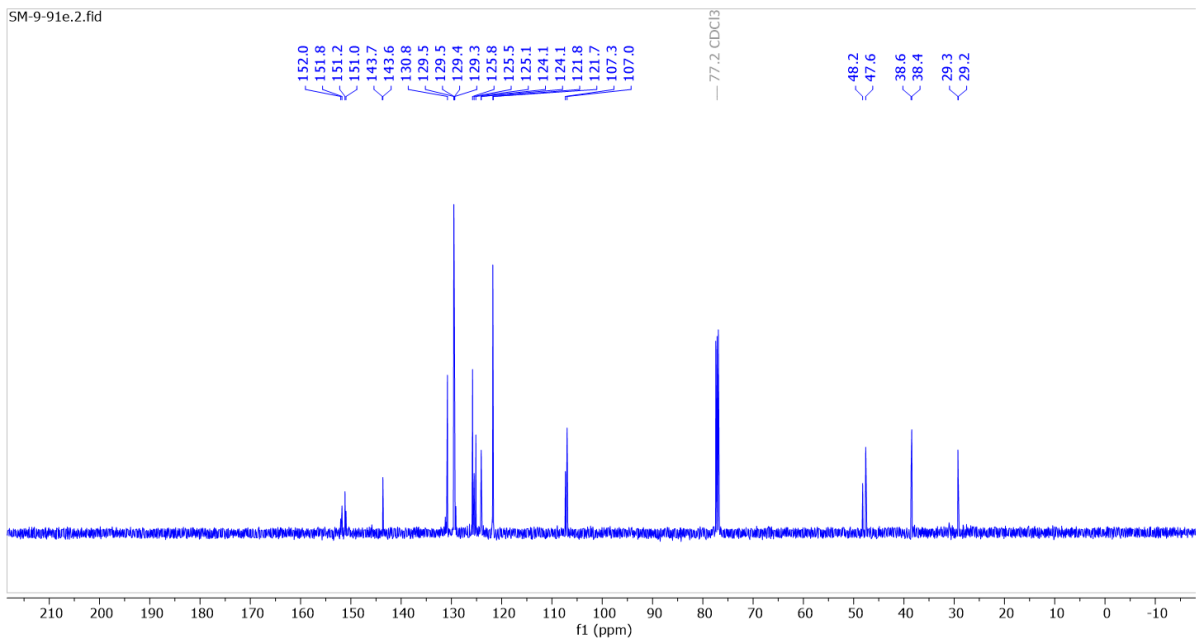

<sup>13</sup>C NMR (126 MHz, CDCl<sub>3</sub>) of 3p

SM-9-91e.3.fid

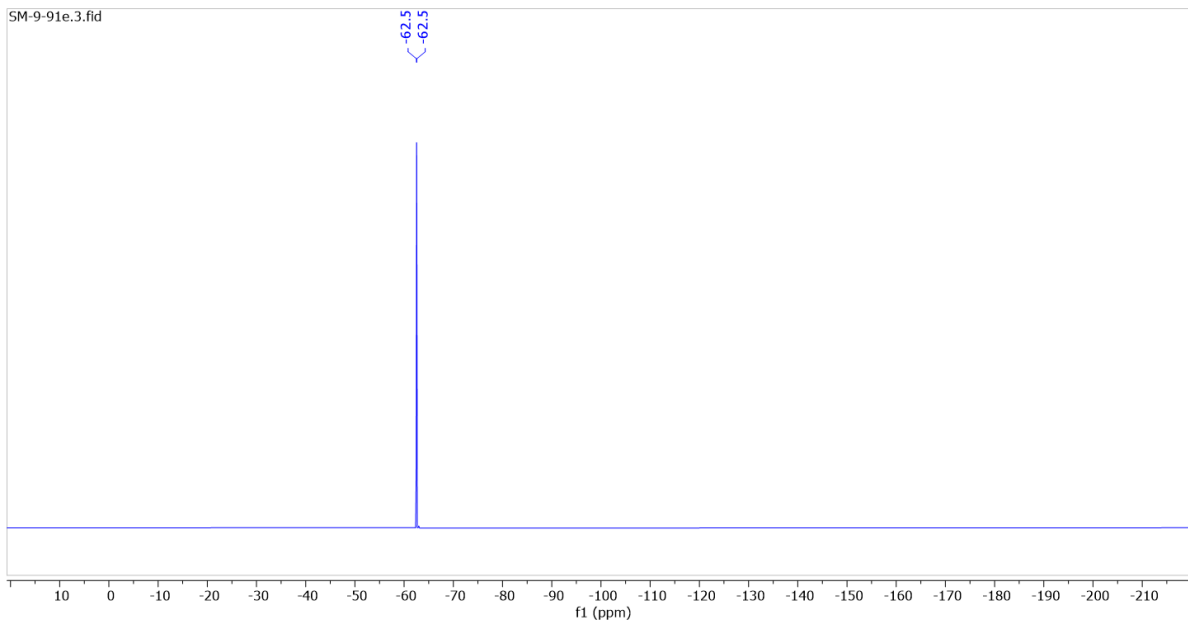

$^{19}\text{F}$  NMR (471 MHz,  $\text{CDCl}_3$ ) of **3p**

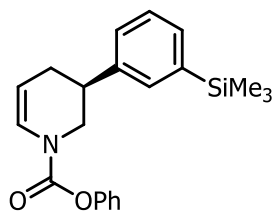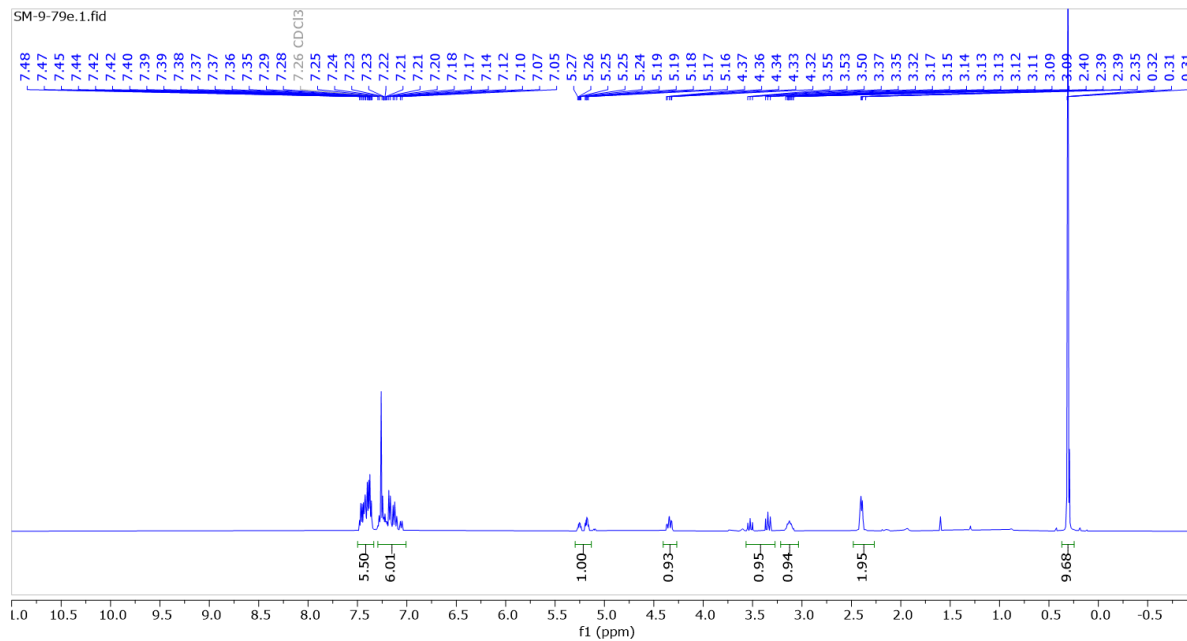

<sup>1</sup>H NMR (500 MHz, CDCl<sub>3</sub>) of 3q

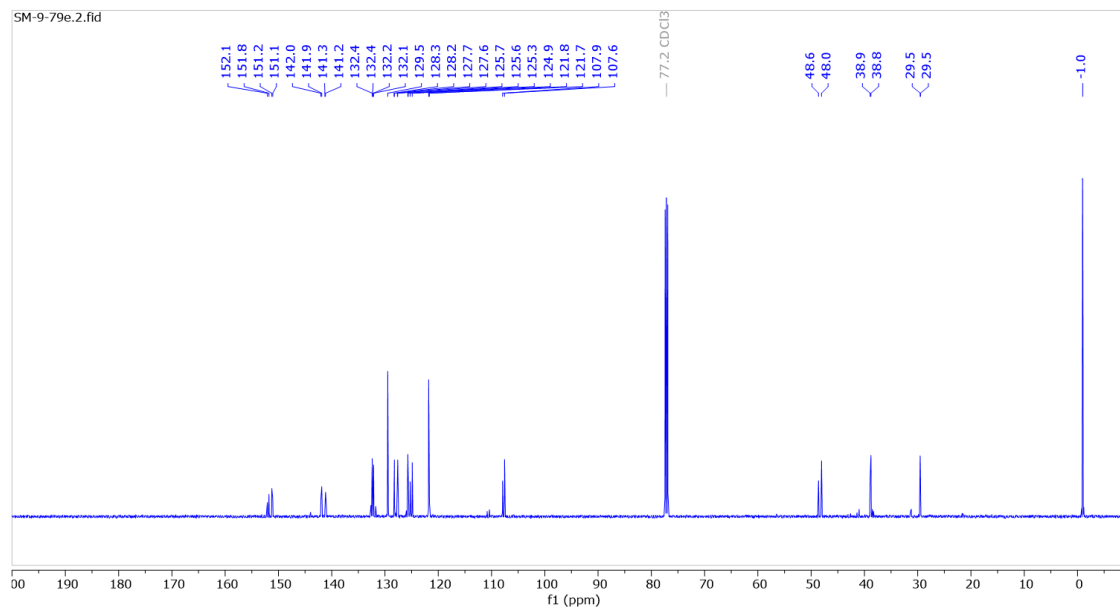

<sup>13</sup>C NMR (101 MHz, CDCl<sub>3</sub>) of 3q

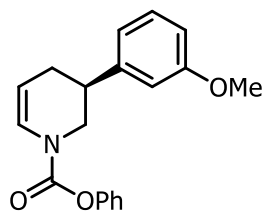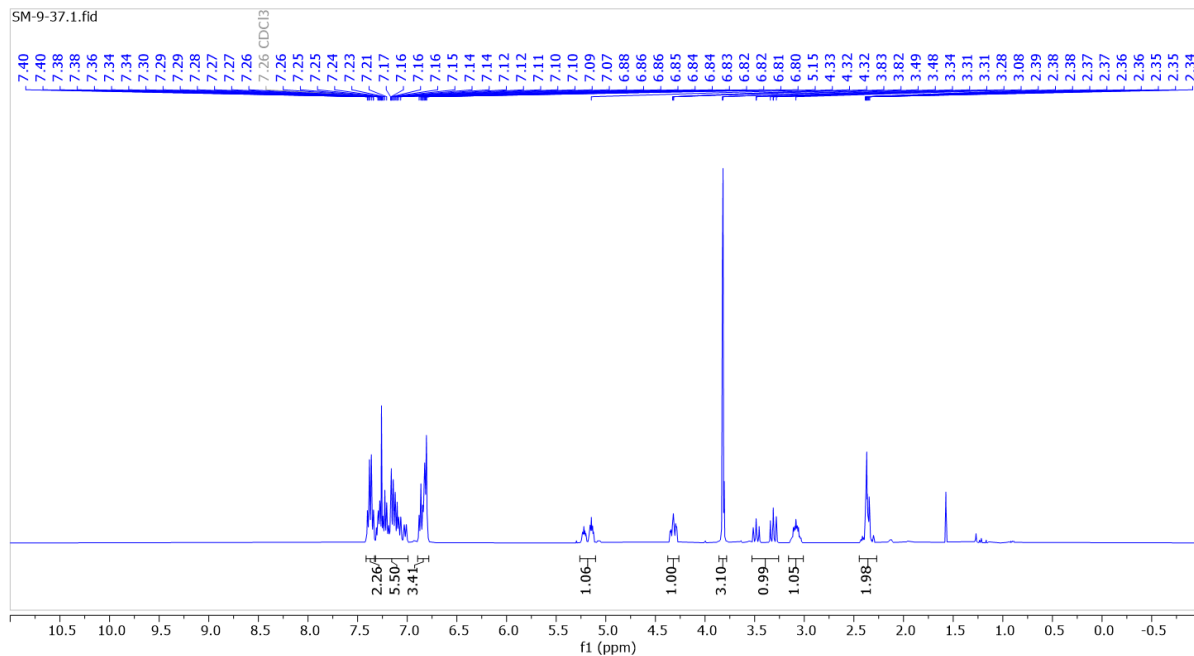

<sup>1</sup>H NMR (400 MHz, CDCl<sub>3</sub>) of **3r**

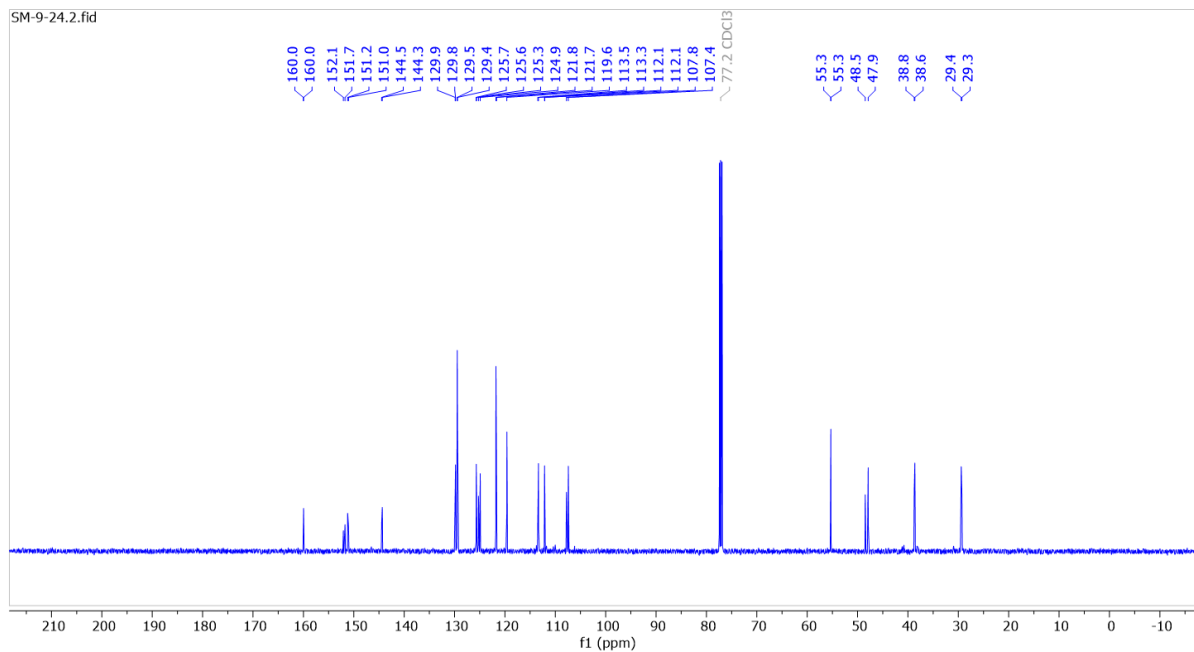

<sup>13</sup>C NMR (126 MHz, CDCl<sub>3</sub>) of **3r**

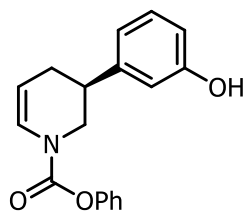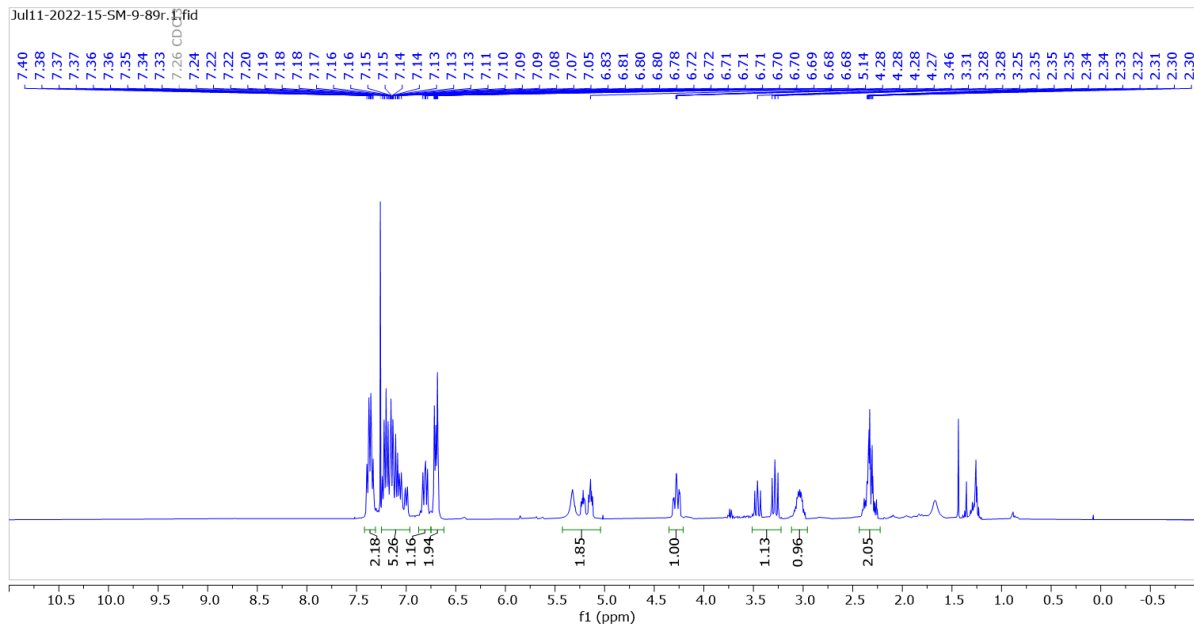

<sup>1</sup>H NMR (400 MHz, CDCl<sub>3</sub>) of **3s**

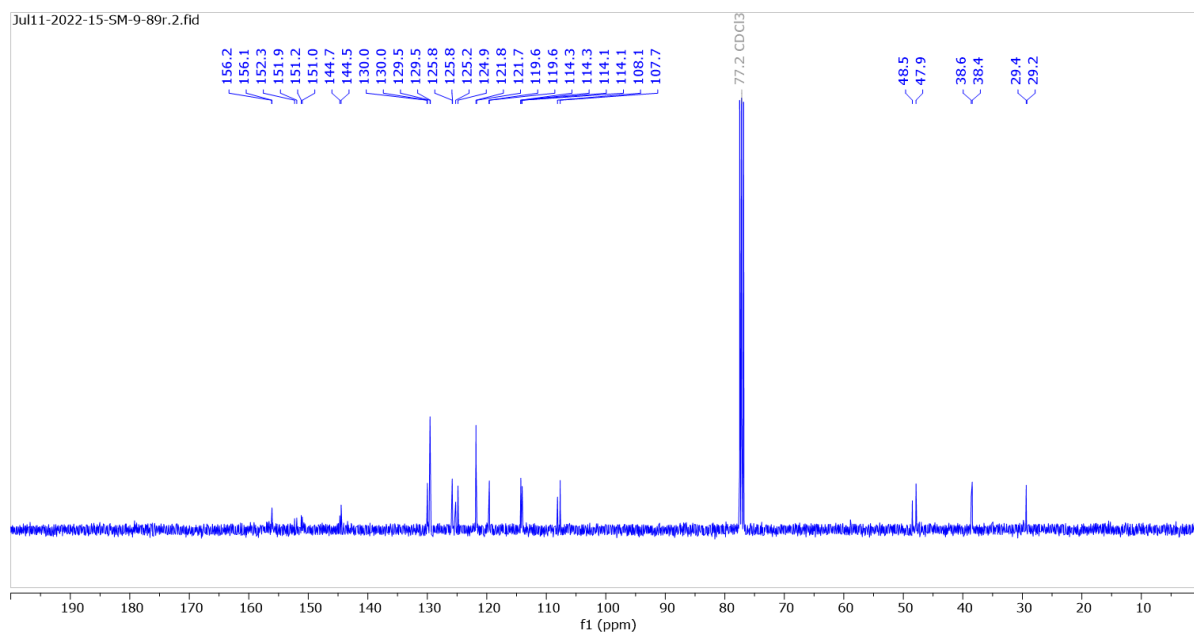

<sup>13</sup>C NMR (101 MHz, CDCl<sub>3</sub>) of **3s**

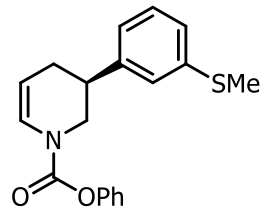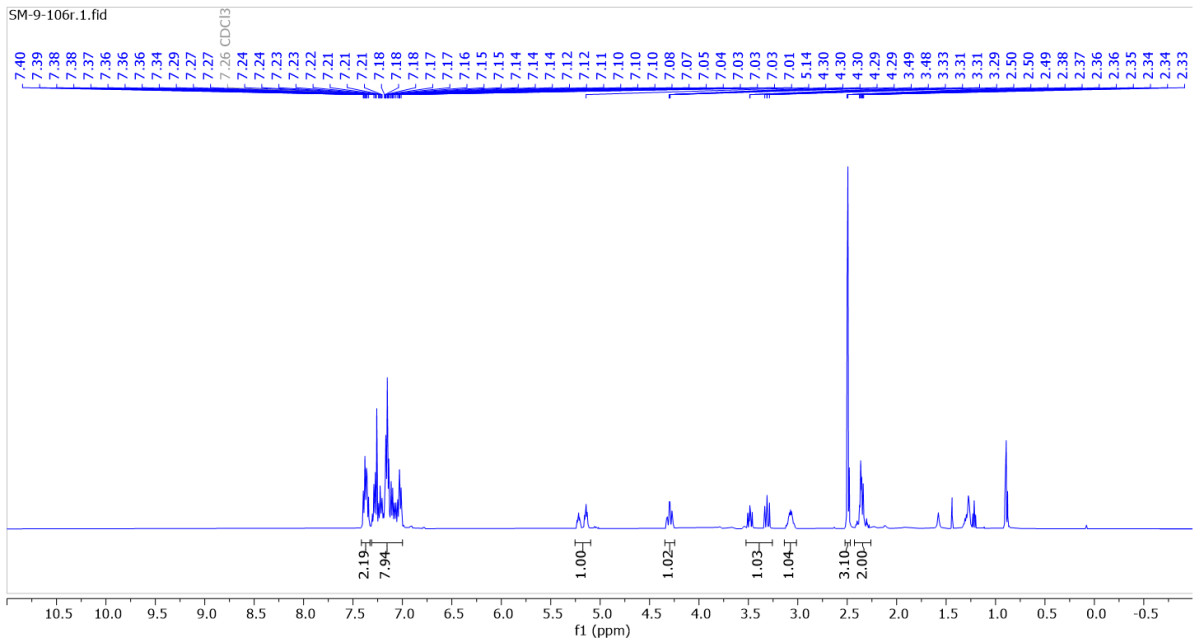

<sup>1</sup>H NMR (500 MHz, CDCl<sub>3</sub>) of 3t

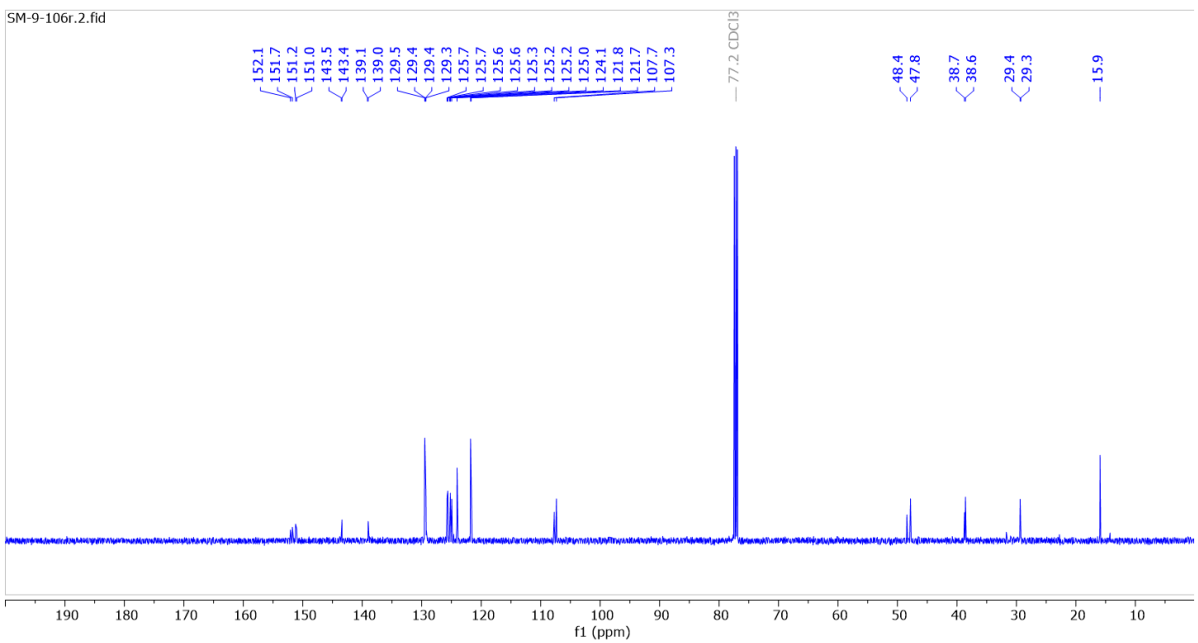

<sup>13</sup>C NMR (126 MHz, CDCl<sub>3</sub>) of 3t

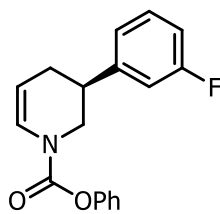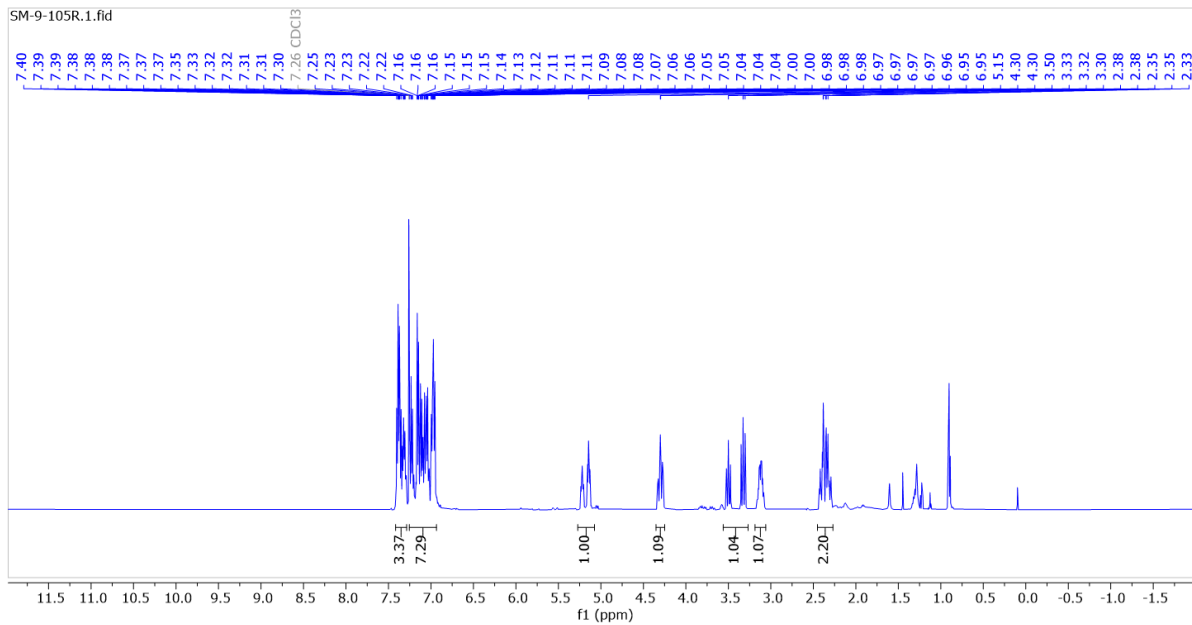

<sup>1</sup>H NMR (500 MHz, CDCl<sub>3</sub>) of **3u**

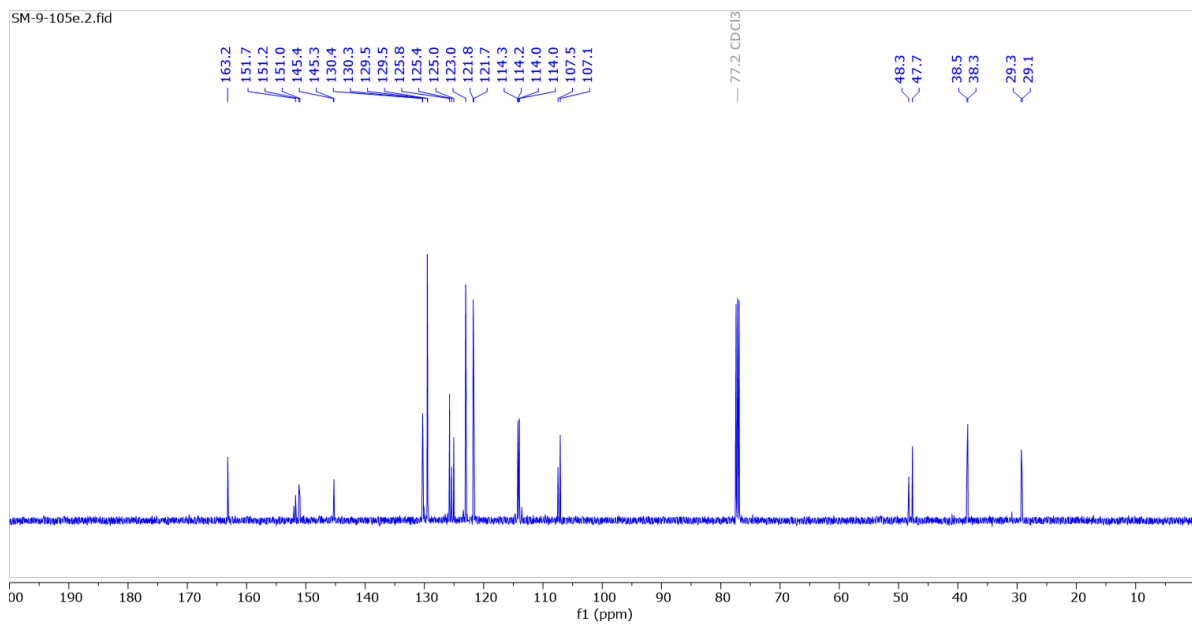

<sup>13</sup>C NMR (126 MHz, CDCl<sub>3</sub>) of **3u**

SM-9-105e.3.fid

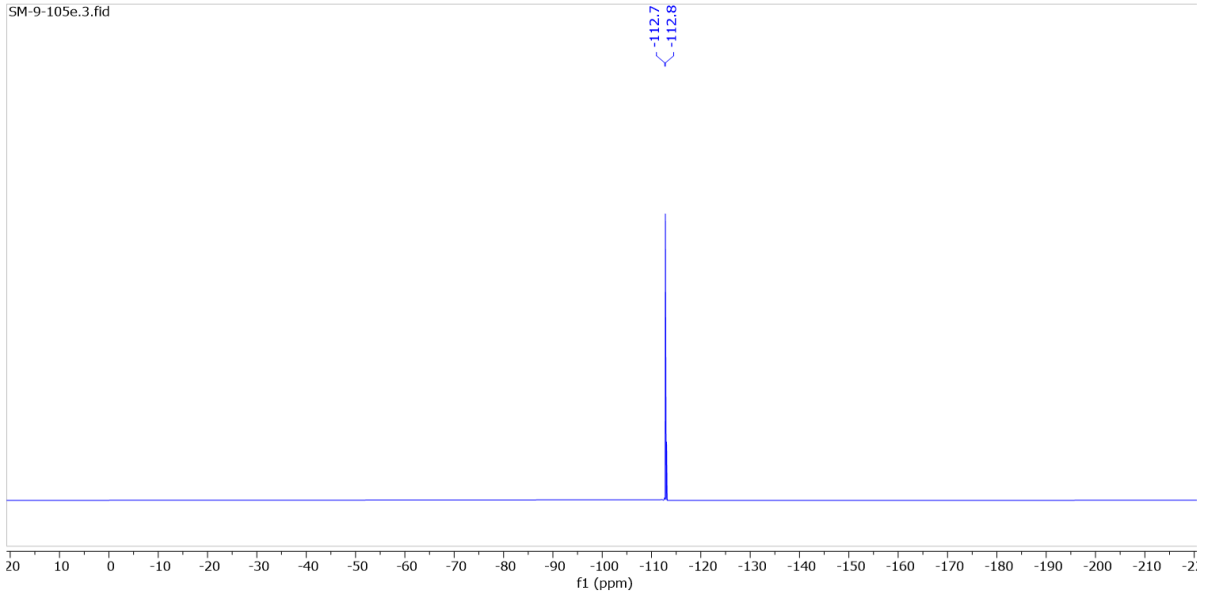

$^{19}\text{F}$  NMR (471 MHz,  $\text{CDCl}_3$ ) of **3u**



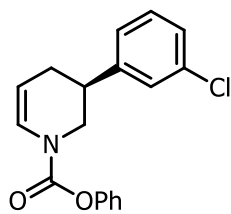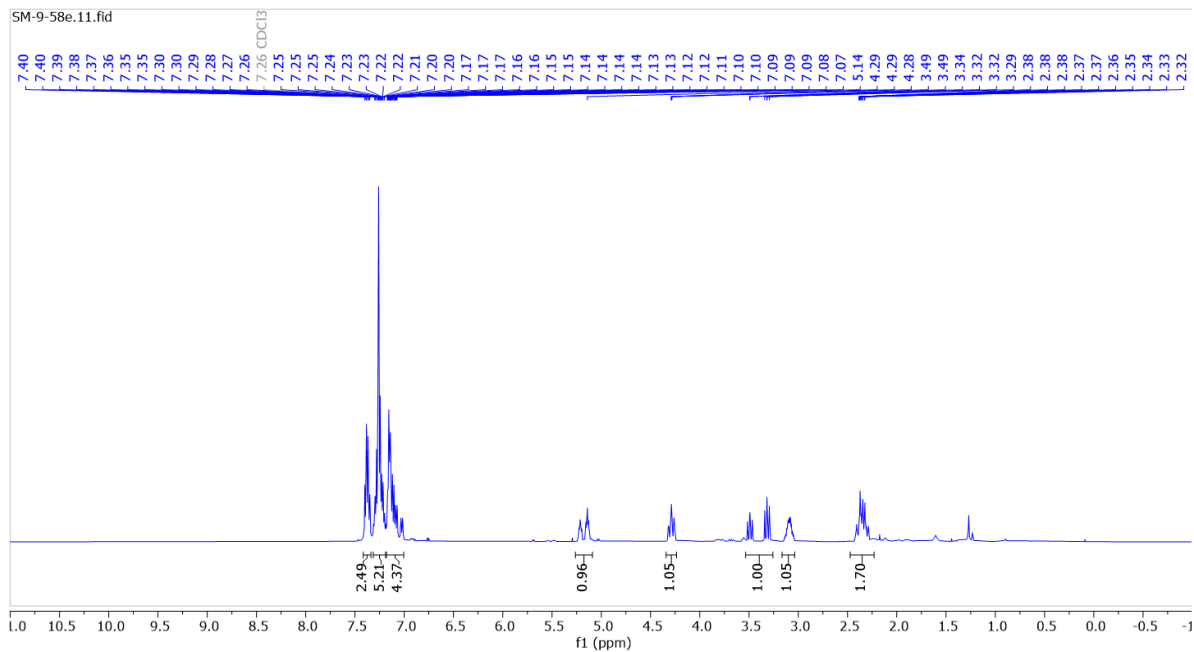

<sup>1</sup>H NMR (500 MHz, CDCl<sub>3</sub>) of 3v

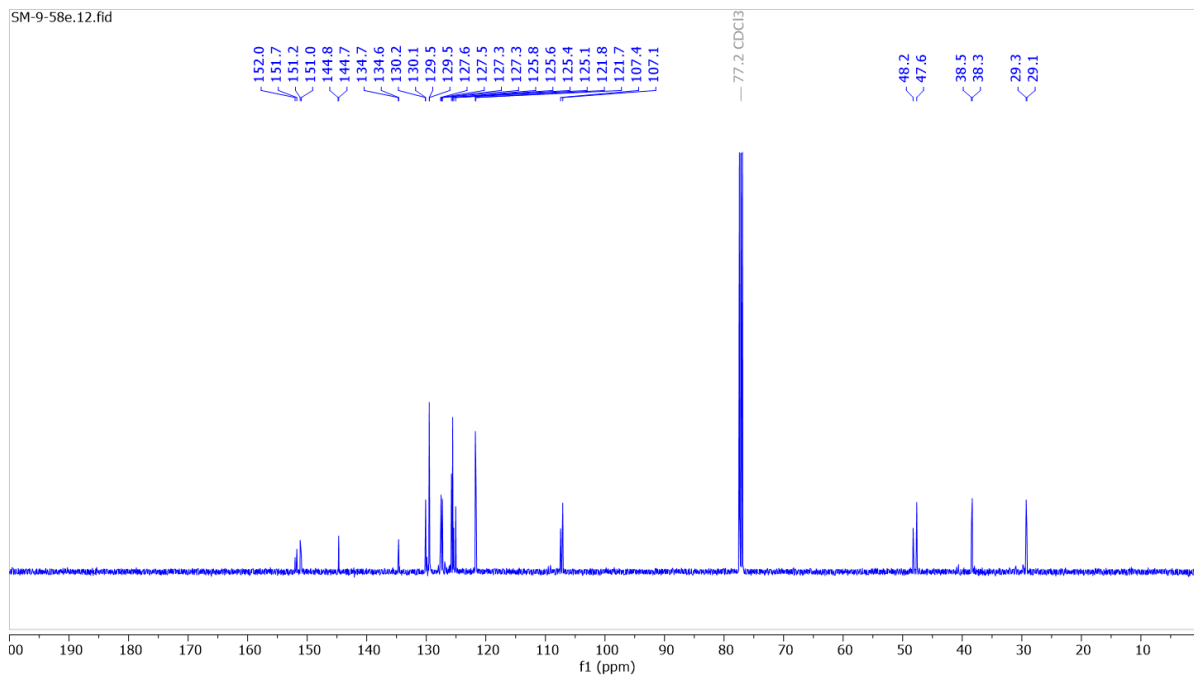

<sup>13</sup>C NMR (126 MHz, CDCl<sub>3</sub>) of 3v

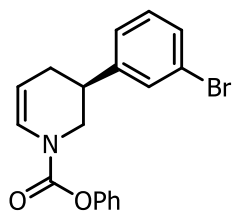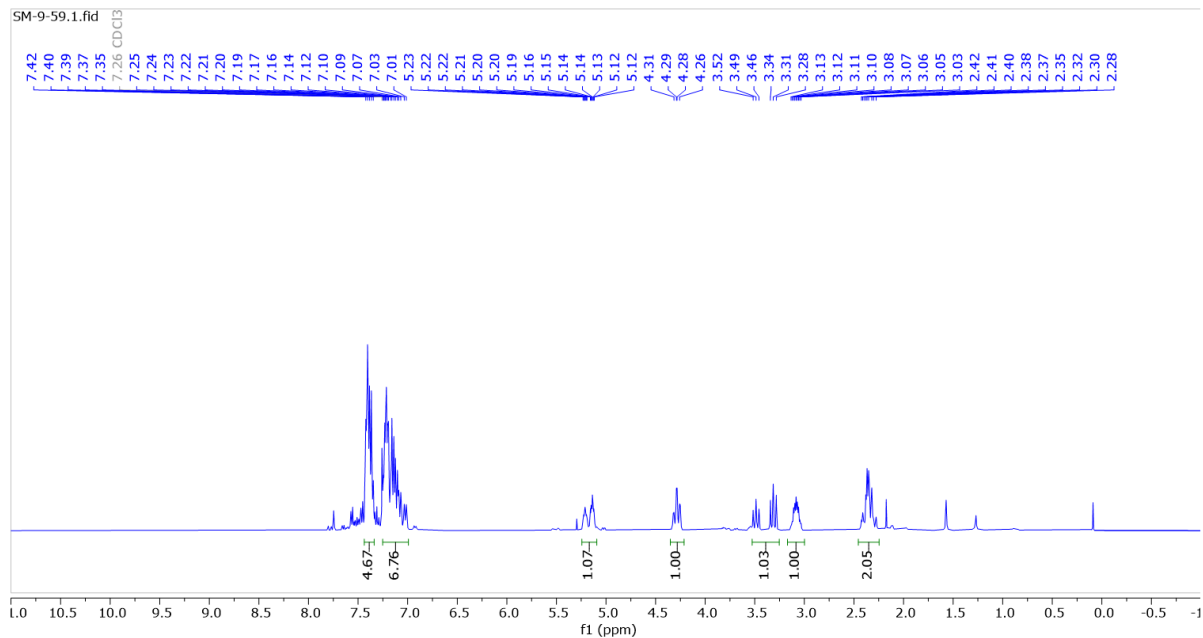

<sup>1</sup>H NMR (400 MHz, CDCl<sub>3</sub>) of **3w**

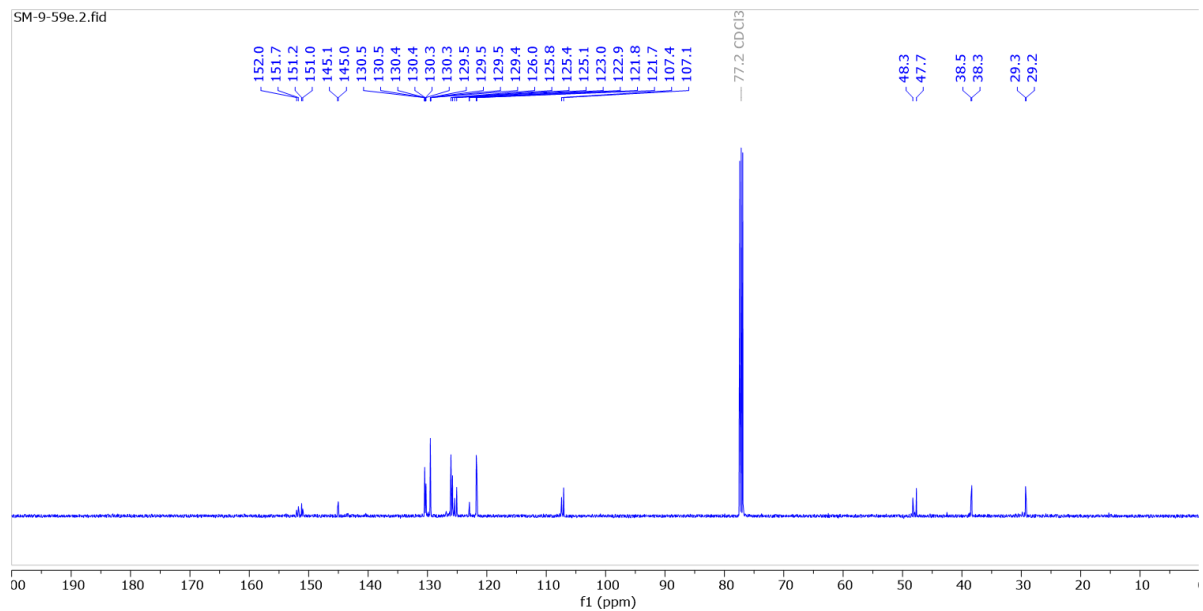

<sup>13</sup>C NMR (126 MHz, CDCl<sub>3</sub>) of **3w**

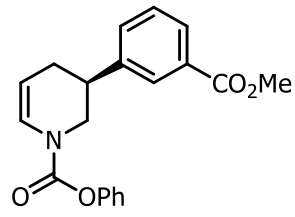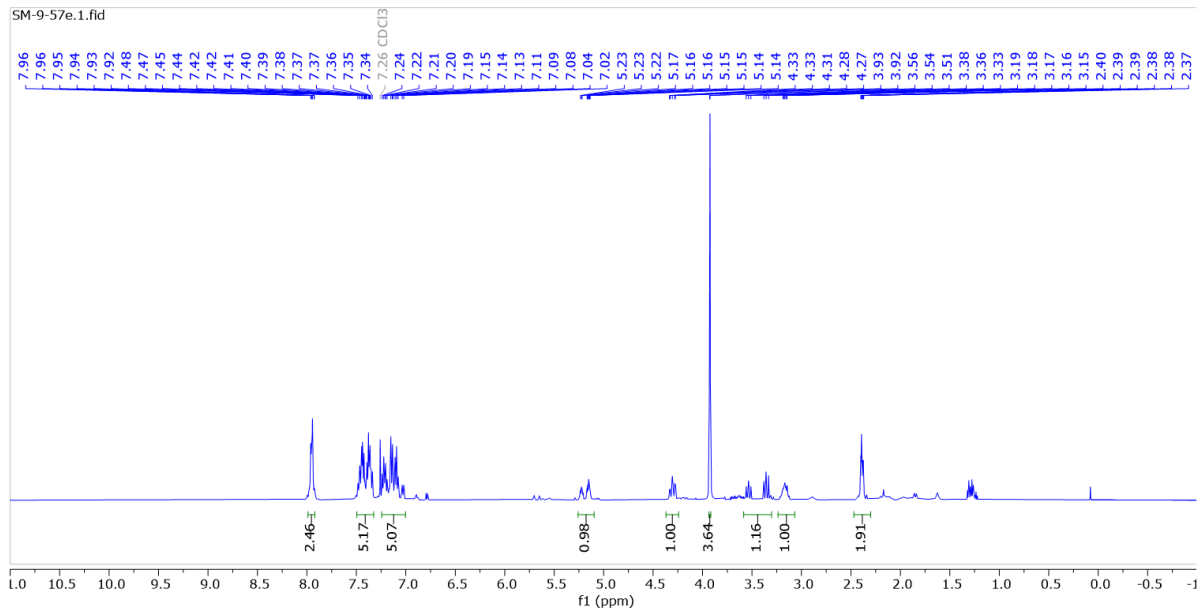

$^1\text{H}$  NMR (500 MHz,  $\text{CDCl}_3$ ) of **3x**

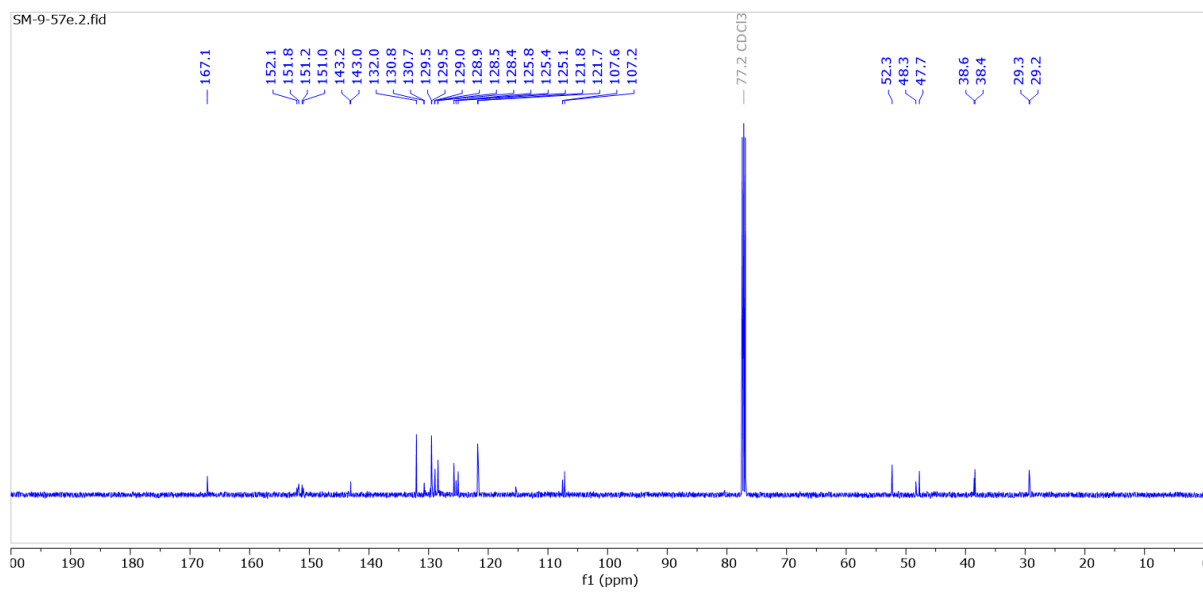

$^{13}\text{C}$  NMR (126 MHz,  $\text{CDCl}_3$ ) of **3x**

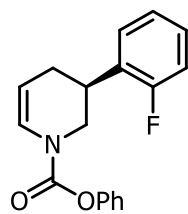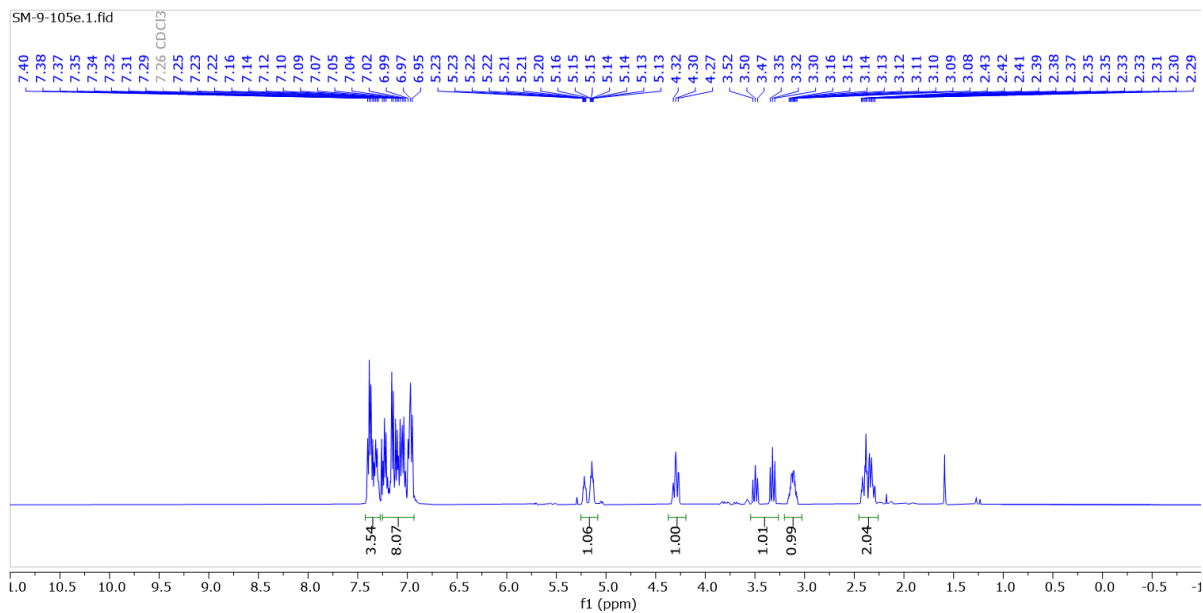

<sup>1</sup>H NMR (500 MHz, CDCl<sub>3</sub>) of 3y

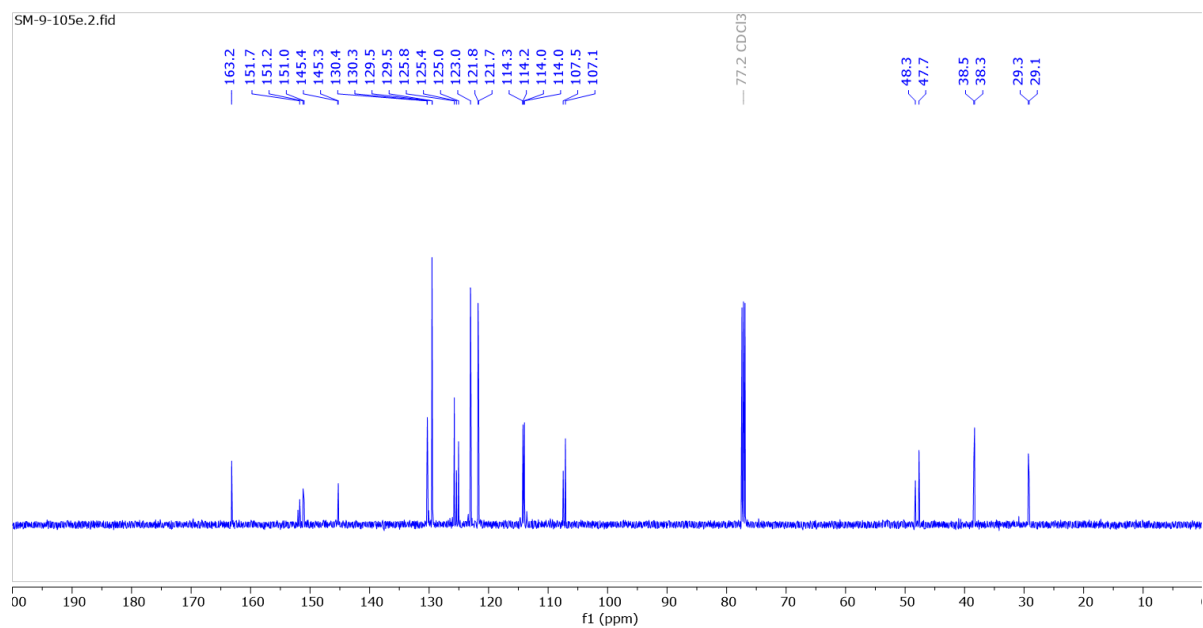

<sup>13</sup>C NMR (101 MHz, CDCl<sub>3</sub>) of 3y

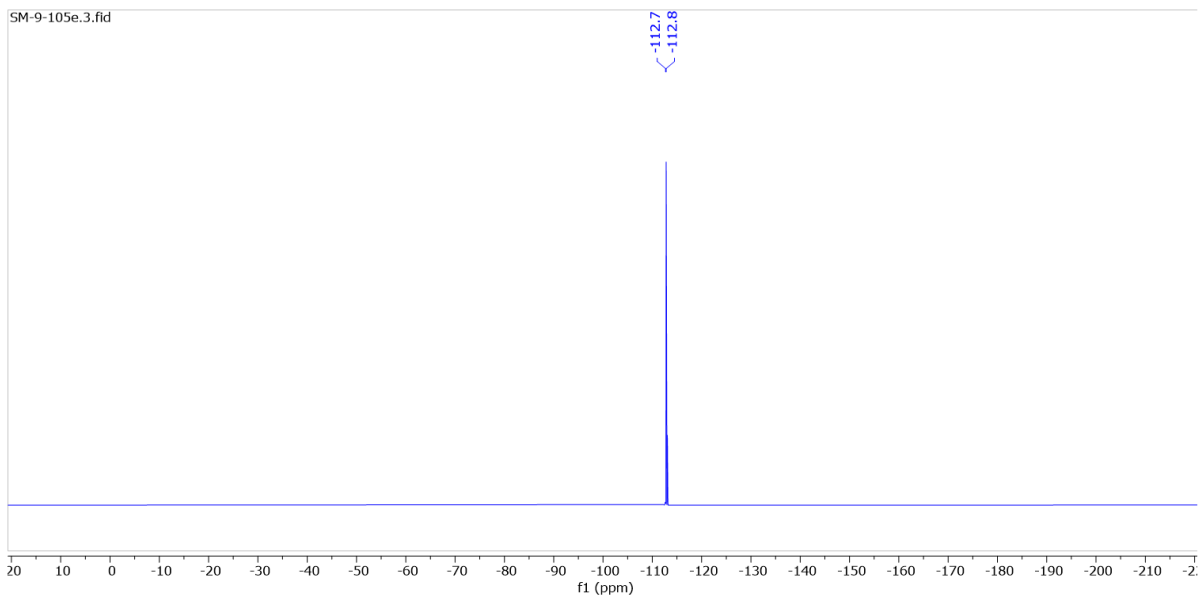

$^{19}\text{F}$  NMR (471 MHz,  $\text{CDCl}_3$ ) of **3y**

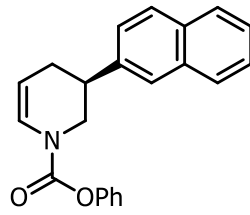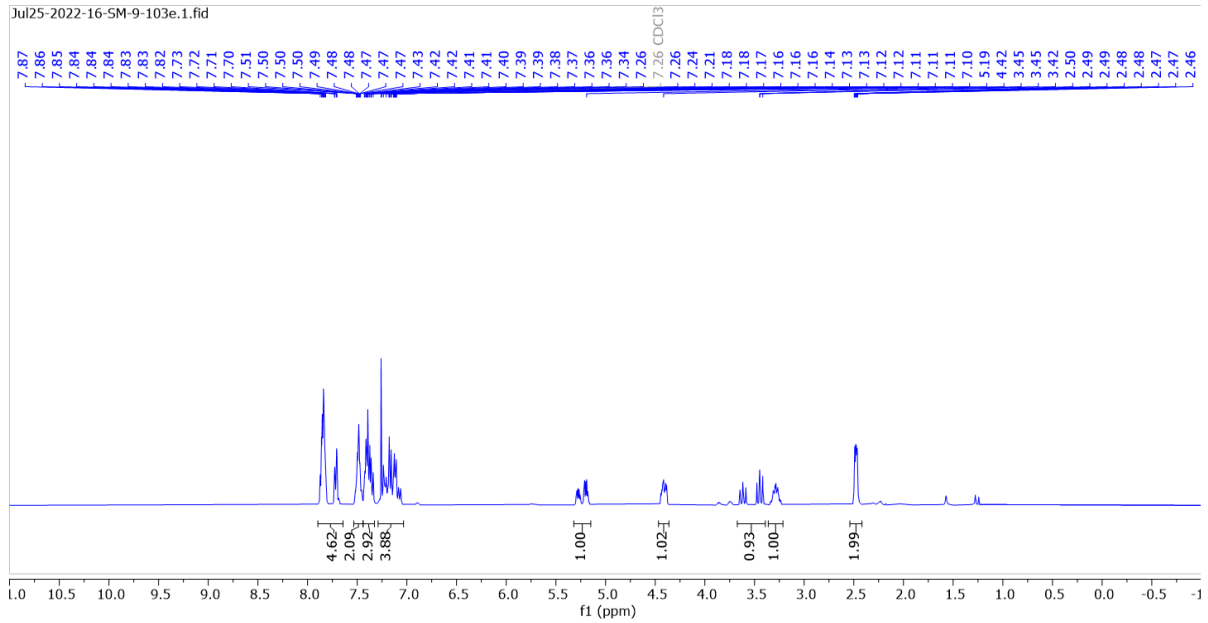

<sup>1</sup>H NMR (400 MHz, CDCl<sub>3</sub>) of **3z**

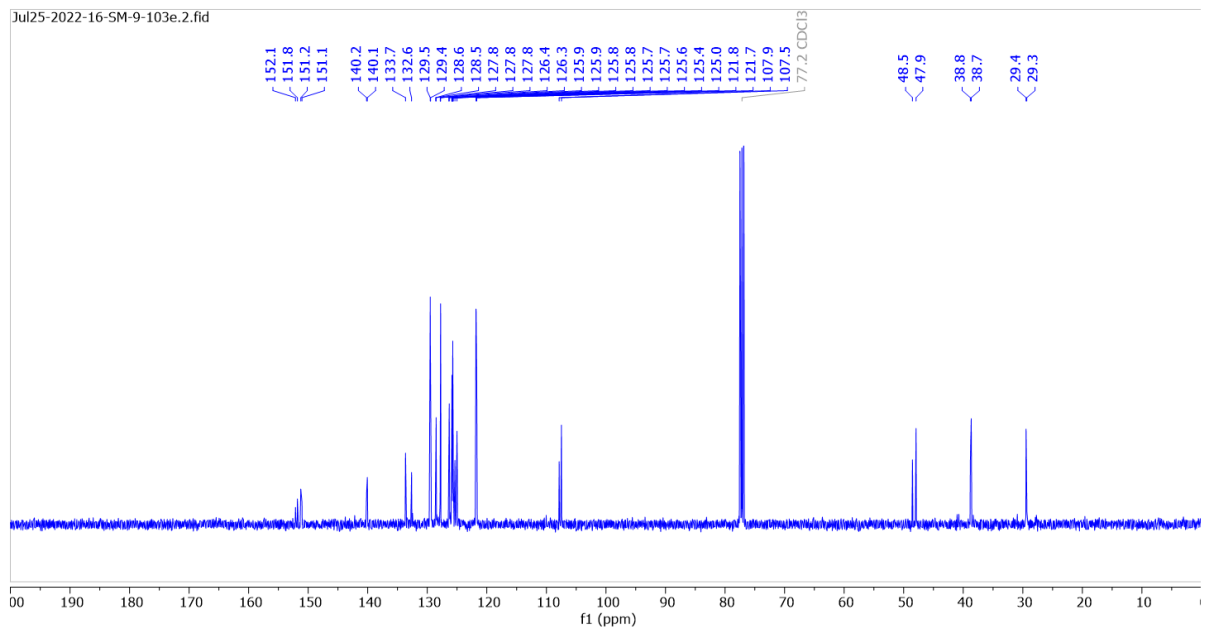

<sup>13</sup>C NMR (101 MHz, CDCl<sub>3</sub>) of **3z**

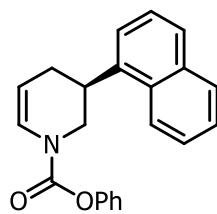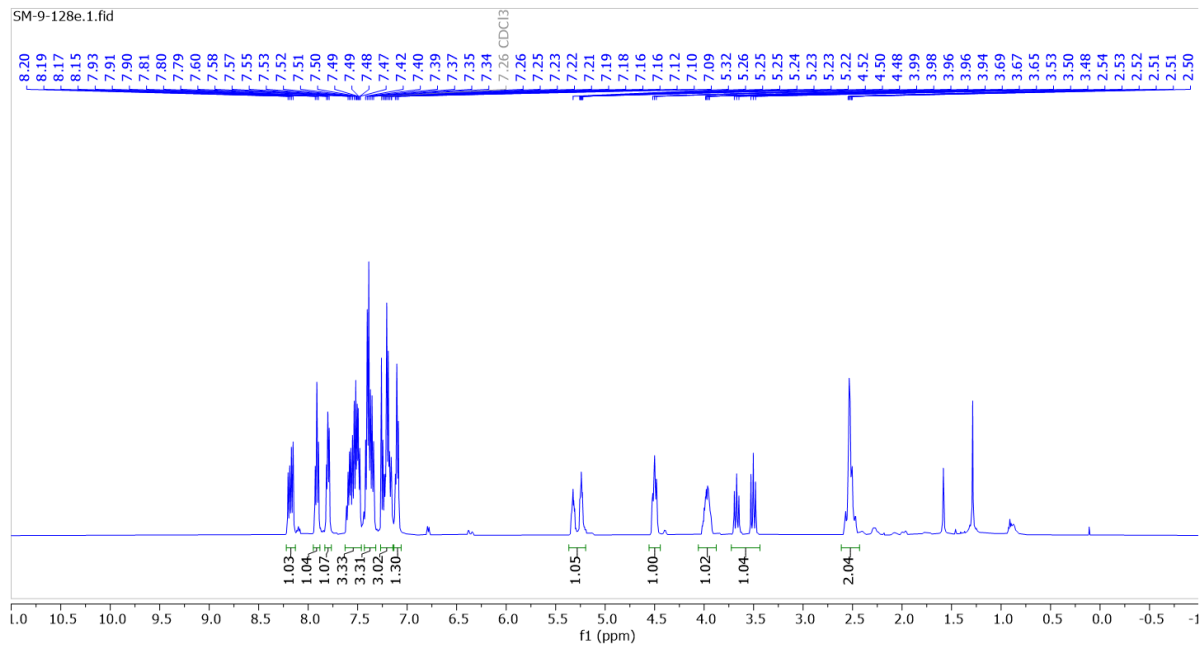

$^1\text{H}$  NMR (500 MHz,  $\text{CDCl}_3$ ) of **3aa**

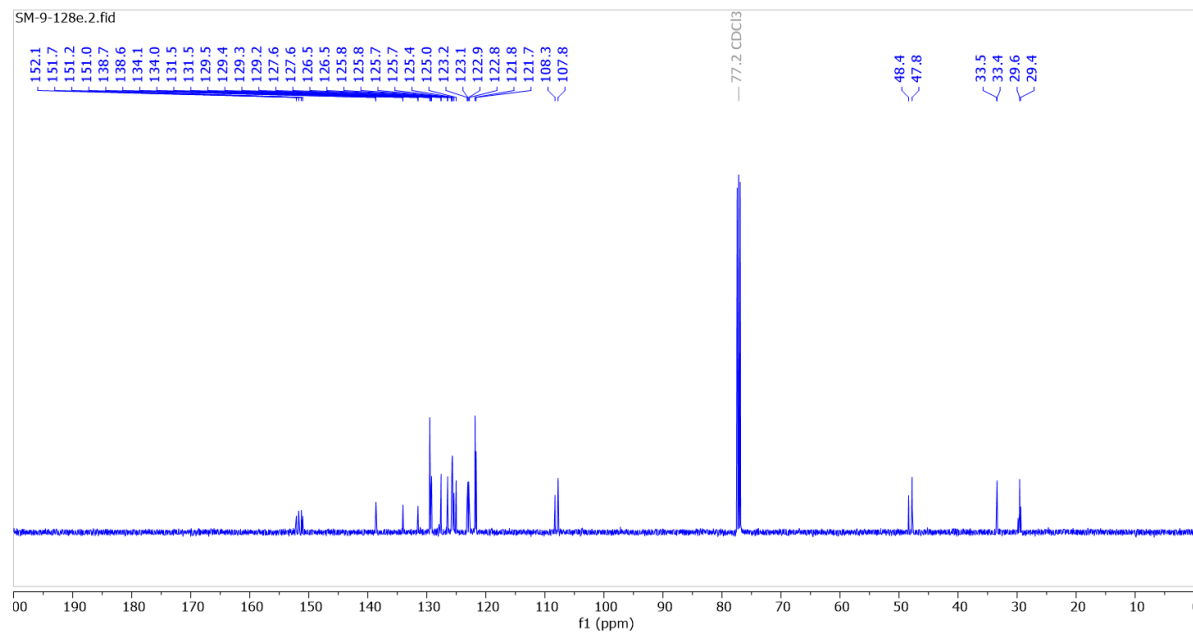

$^{13}\text{C}$  NMR (126 MHz,  $\text{CDCl}_3$ ) of **3aa**

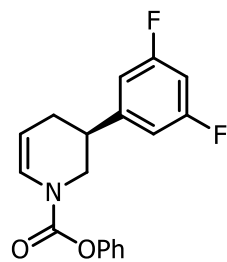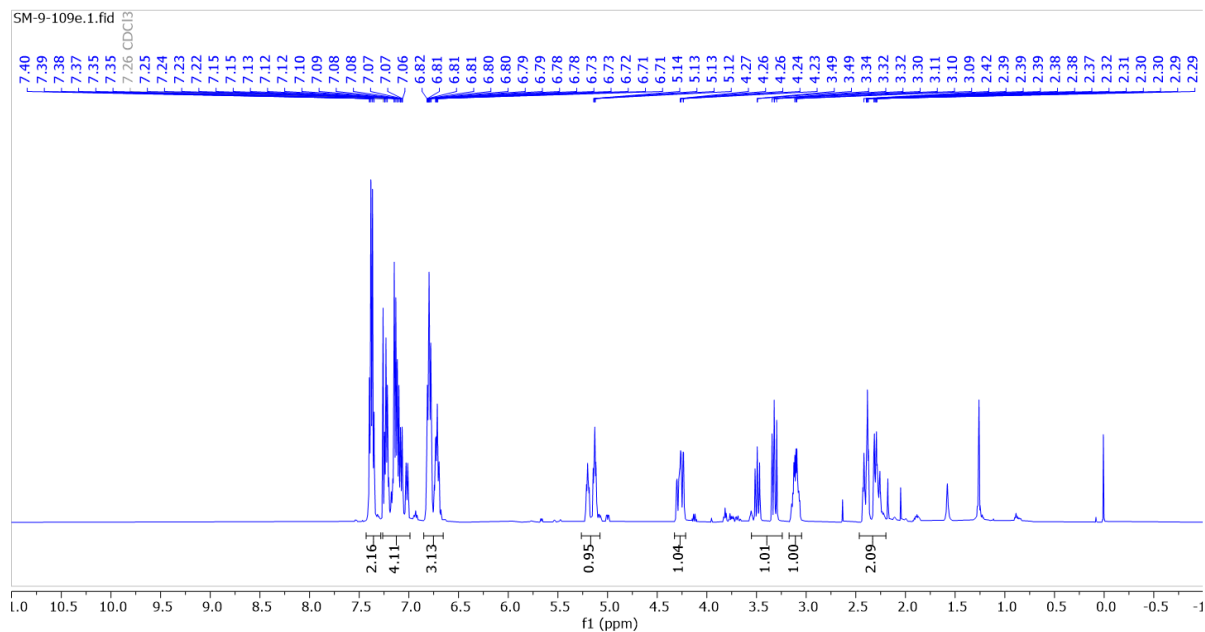

<sup>1</sup>H NMR (500 MHz, CDCl<sub>3</sub>) of 3b

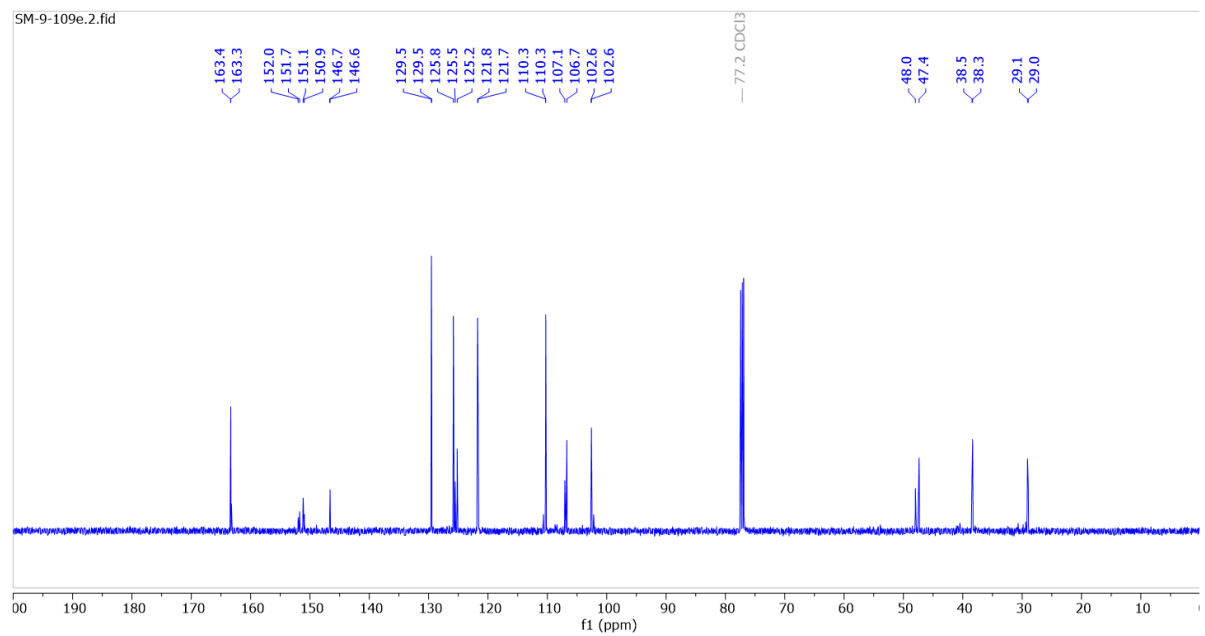

<sup>13</sup>C NMR (126 MHz, CDCl<sub>3</sub>) of 3b



SM-9-109e.3.fid

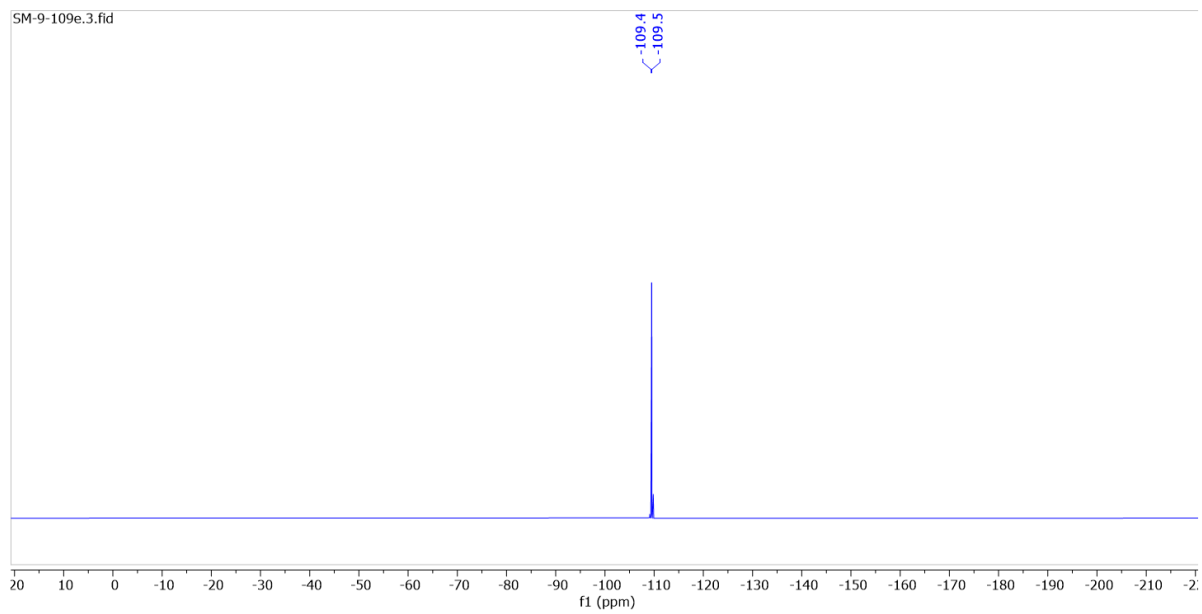

$^{19}\text{F}$  NMR (471 MHz,  $\text{CDCl}_3$ ) of **3ab**

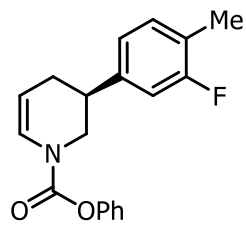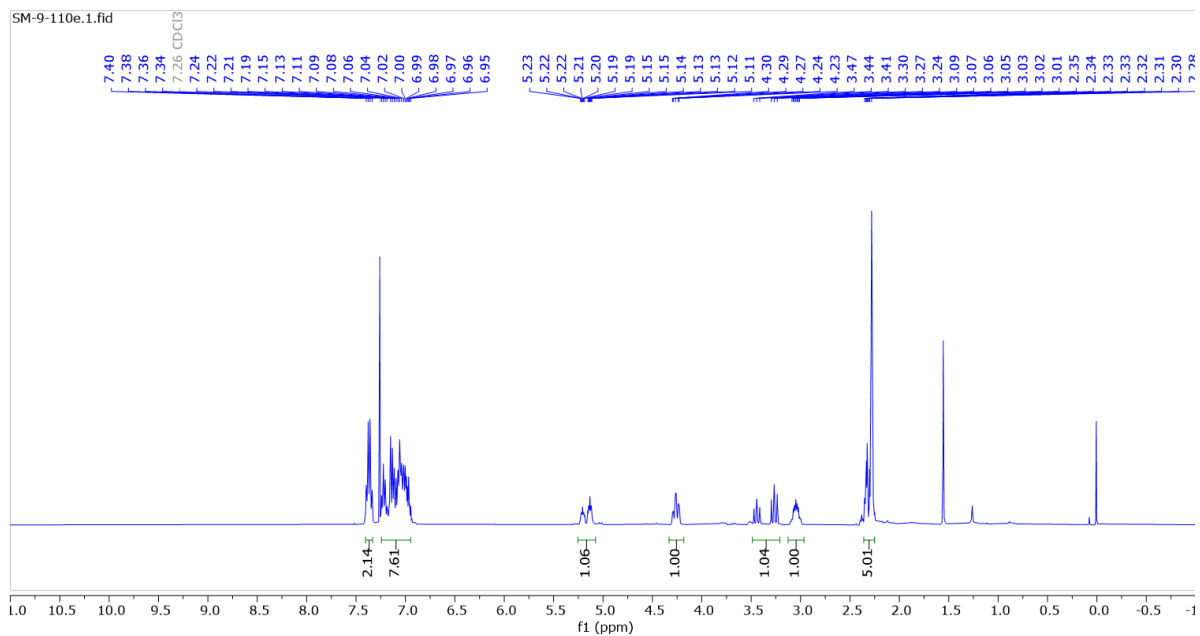

<sup>1</sup>H NMR (400 MHz, CDCl<sub>3</sub>) of 3ac

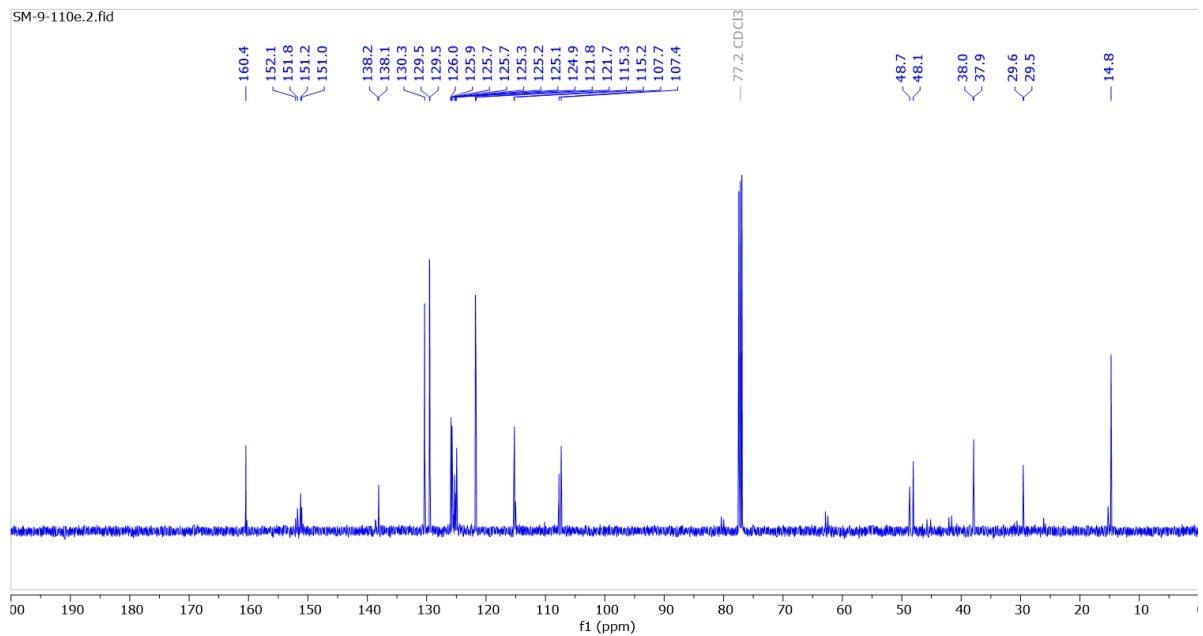

<sup>13</sup>C NMR (126 MHz, CDCl<sub>3</sub>) of 3ac

SM-9-110.3

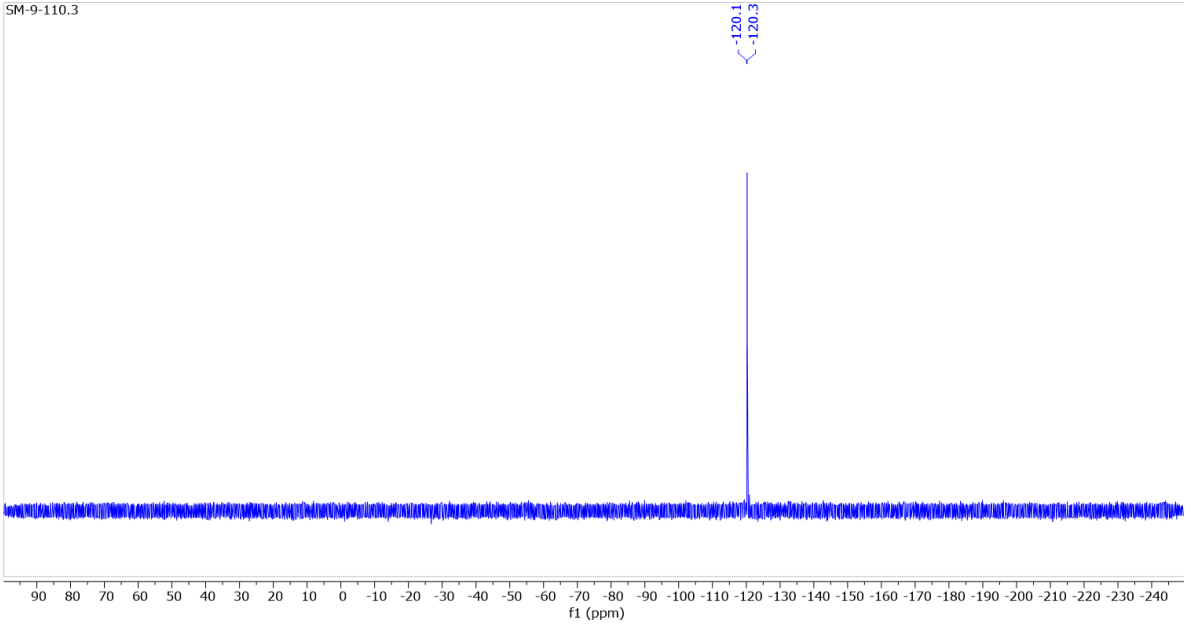

$^{19}\text{F}$  NMR (471 MHz,  $\text{CDCl}_3$ ) of **3ac**

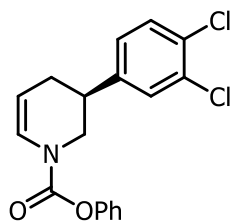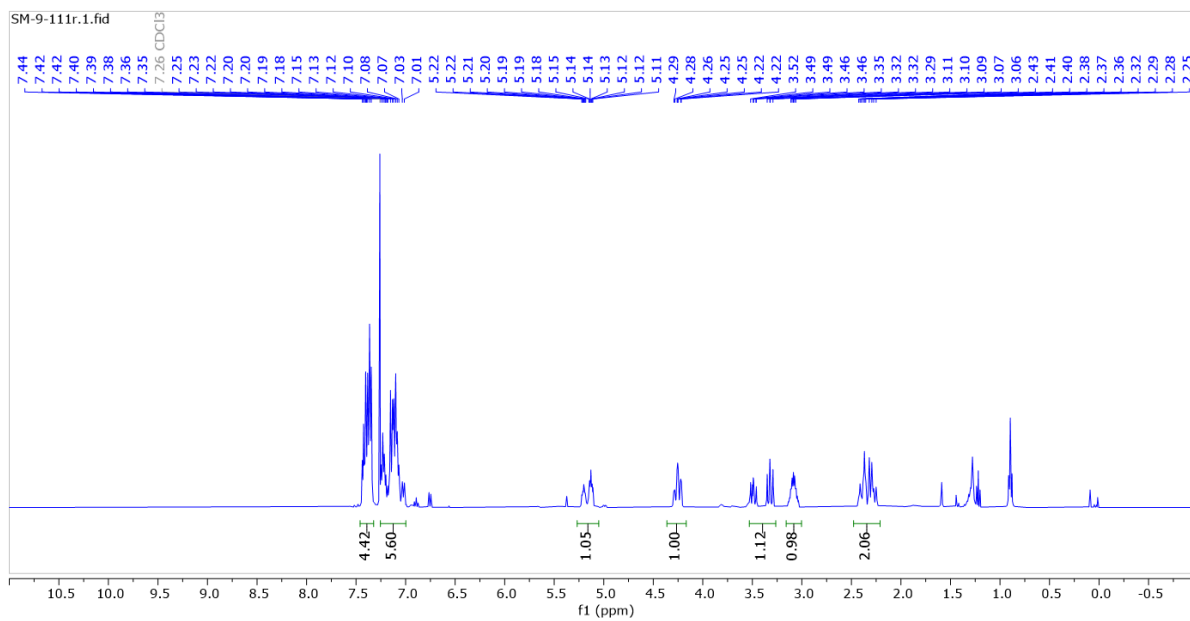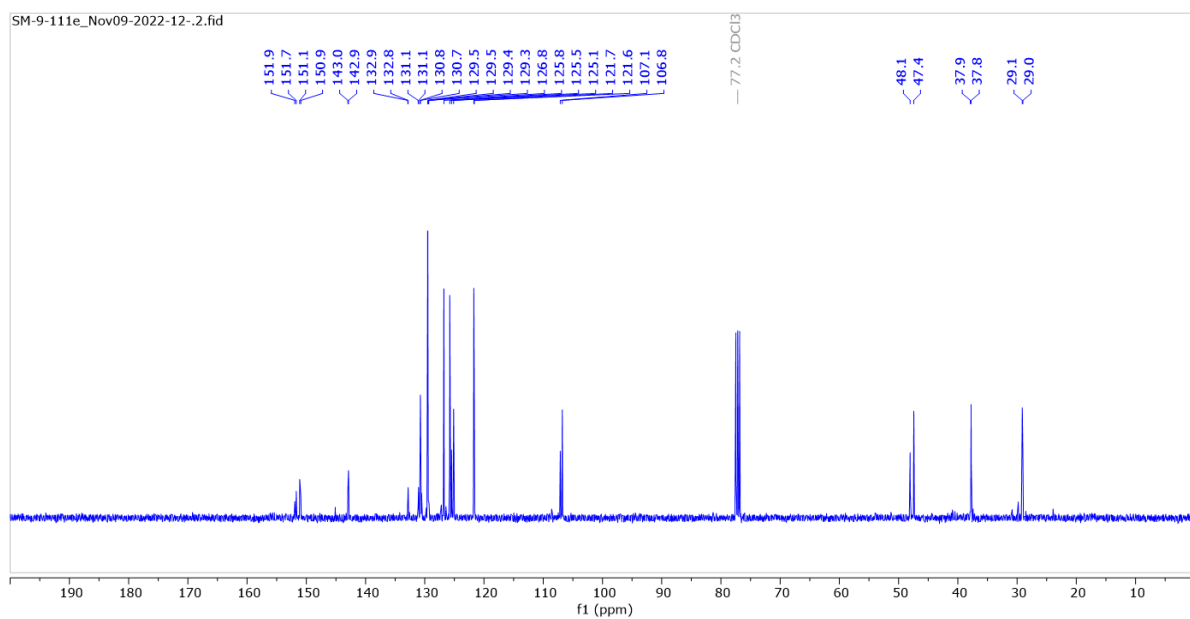

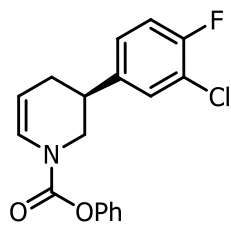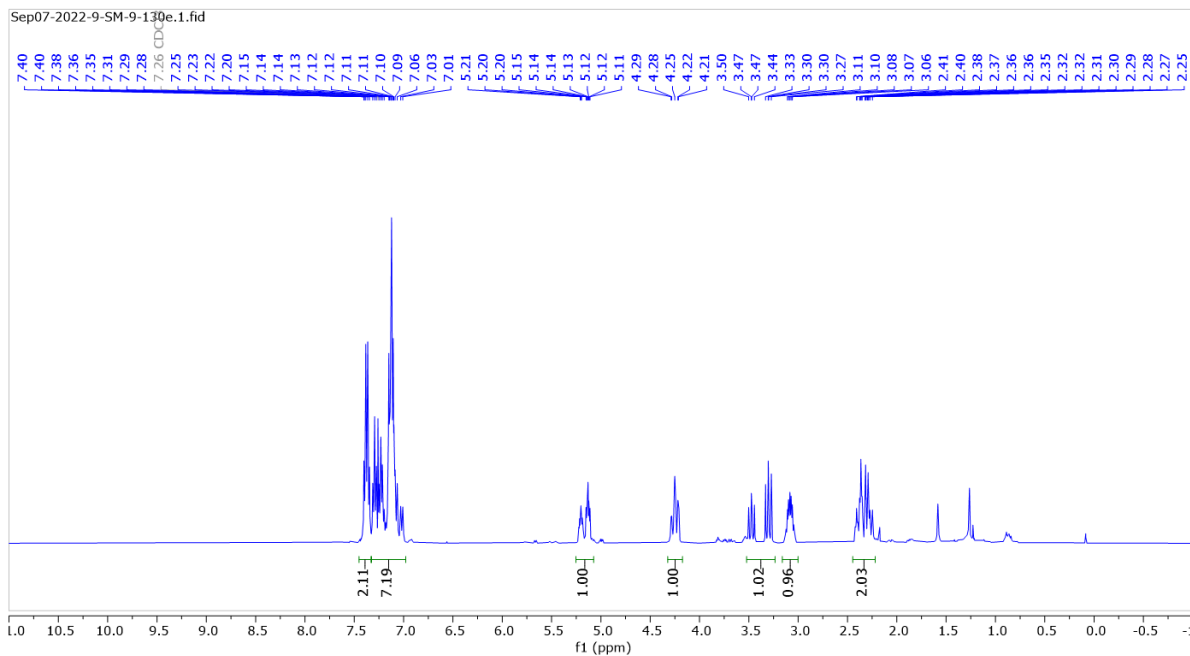

<sup>1</sup>H NMR (400 MHz, CDCl<sub>3</sub>) of **3ae**

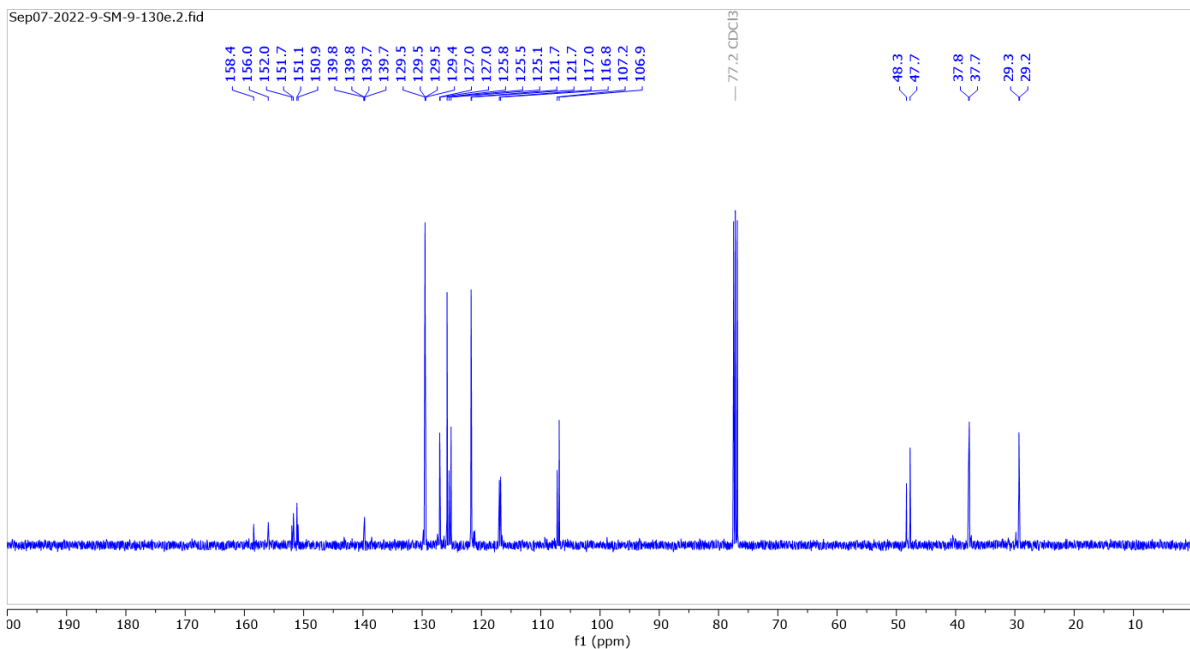

<sup>13</sup>C NMR (101 MHz, CDCl<sub>3</sub>) of **3ae**

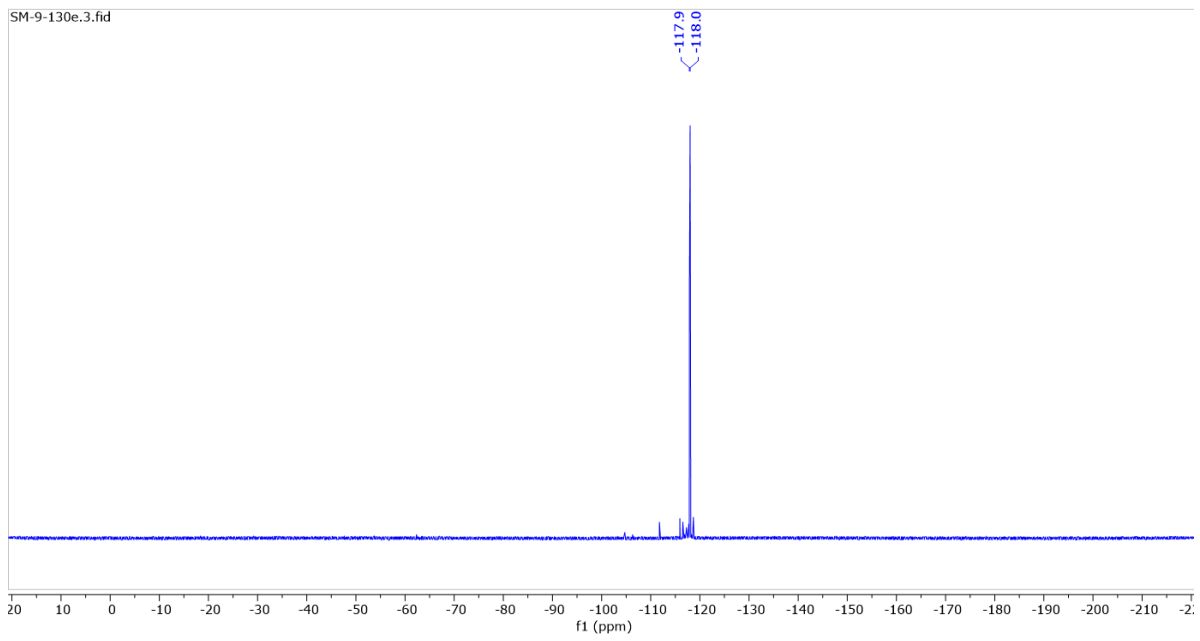

$^{19}\text{F}$  NMR (471 MHz,  $\text{CDCl}_3$ ) of **3ae**

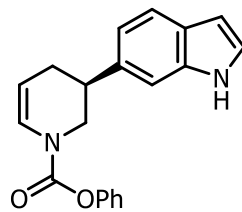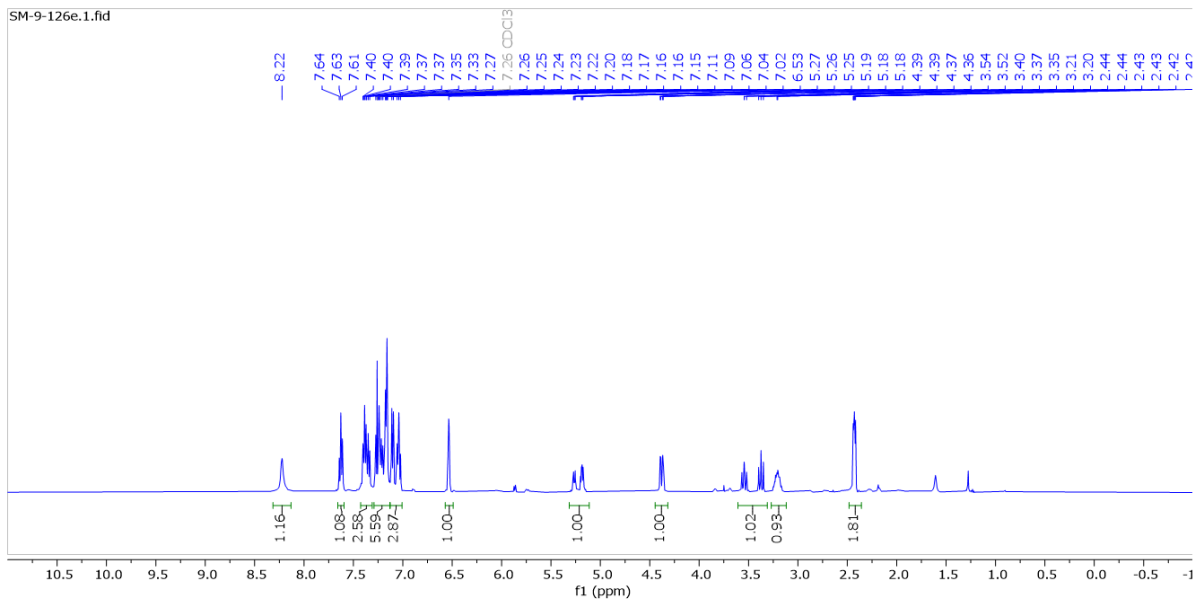

<sup>1</sup>H NMR (500 MHz, CDCl<sub>3</sub>) of **3af**

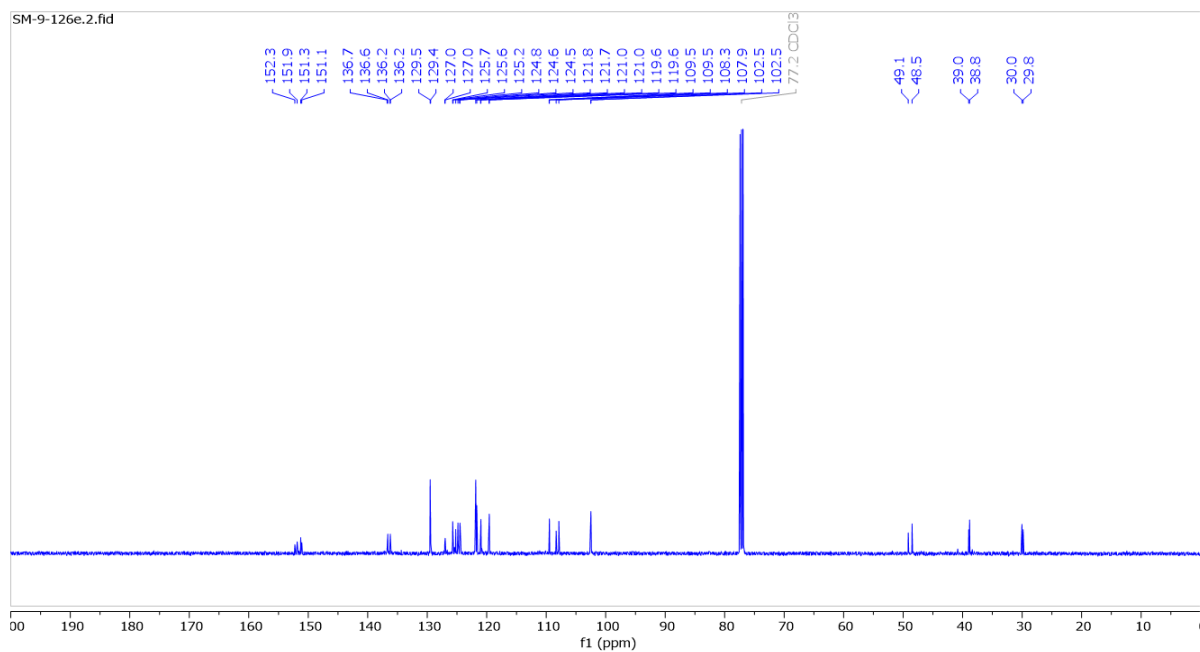

<sup>13</sup>C NMR (126 MHz, CDCl<sub>3</sub>) of **3af**

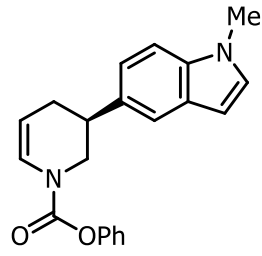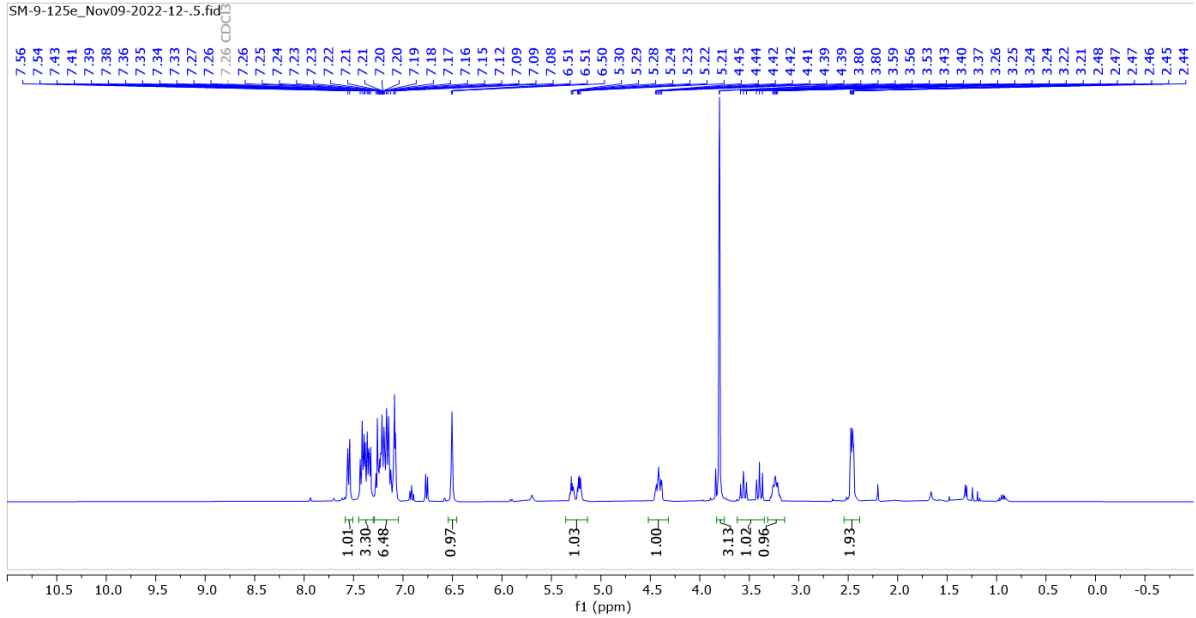

<sup>1</sup>H NMR (400 MHz, CDCl<sub>3</sub>) of 3ag

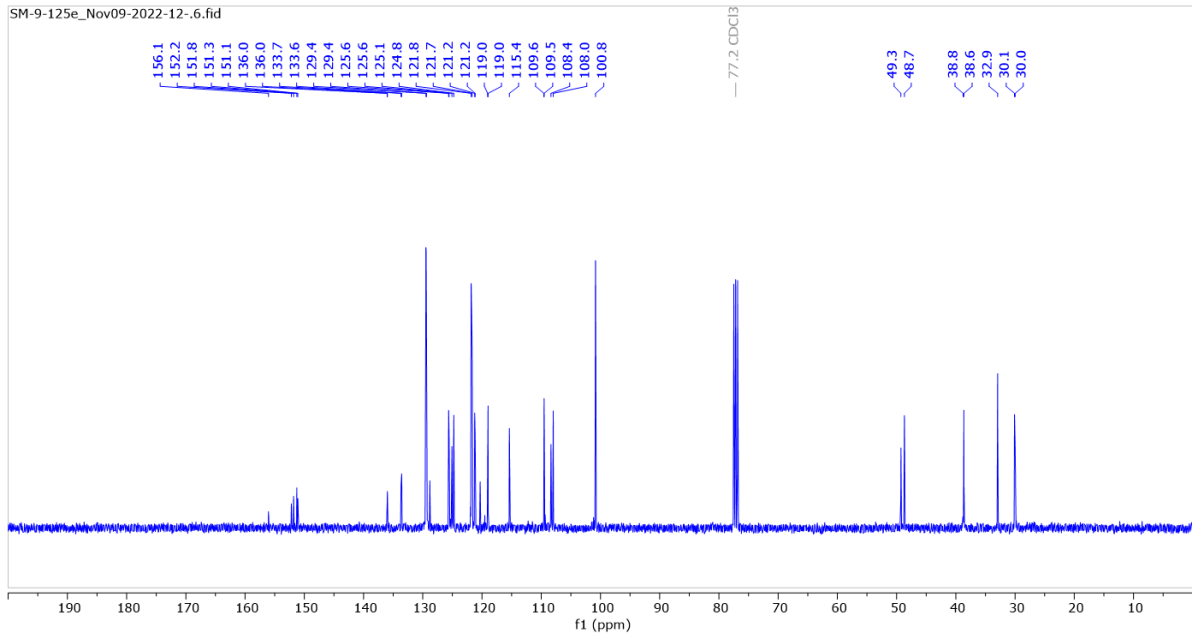

<sup>13</sup>C NMR (101 MHz, CDCl<sub>3</sub>) of 3ag



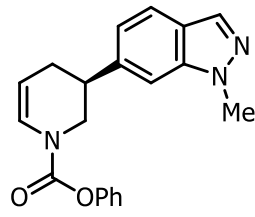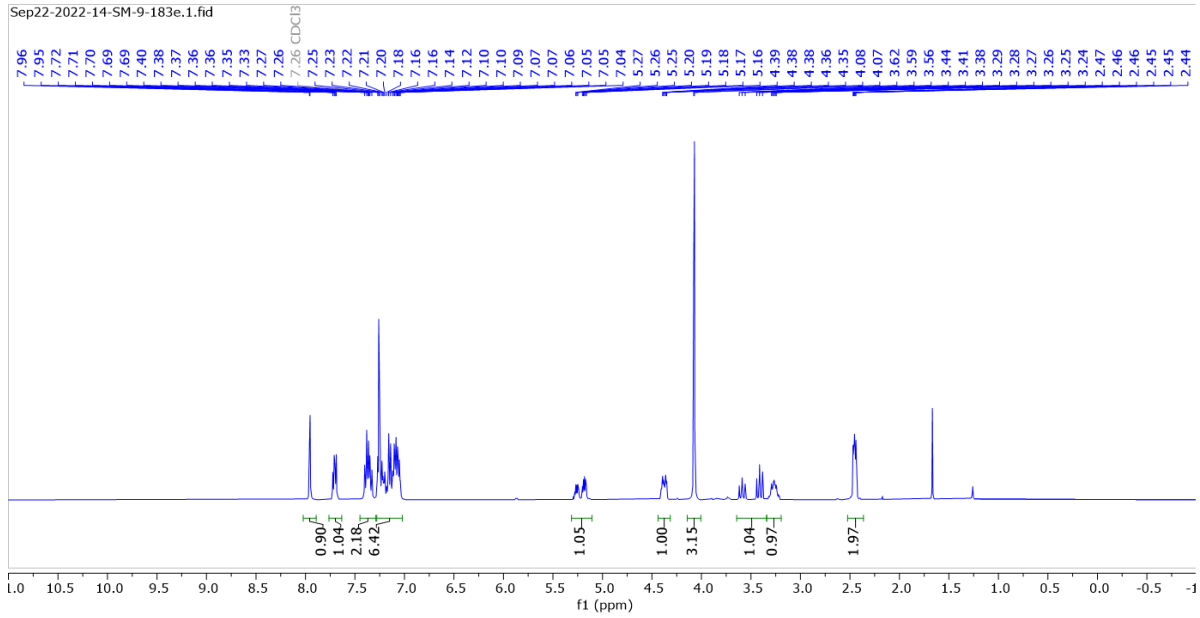

<sup>1</sup>H NMR (400 MHz, CDCl<sub>3</sub>) of 3ah

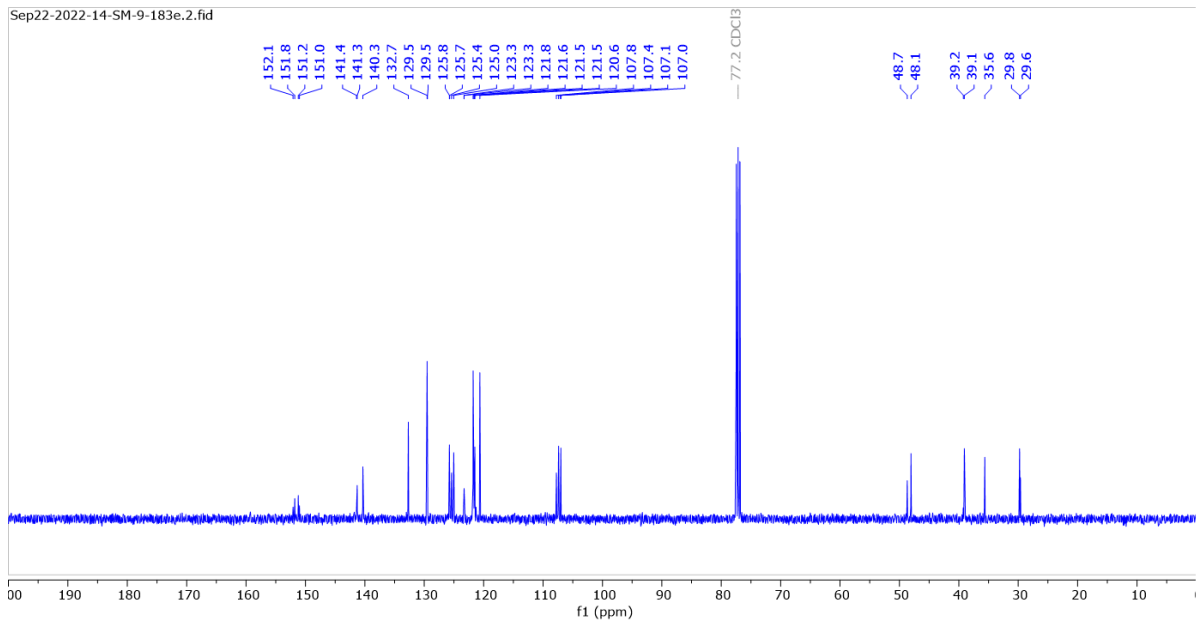

<sup>13</sup>C NMR (101 MHz, CDCl<sub>3</sub>) of 3ah

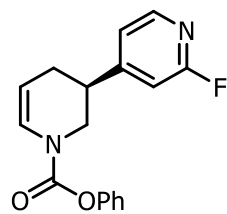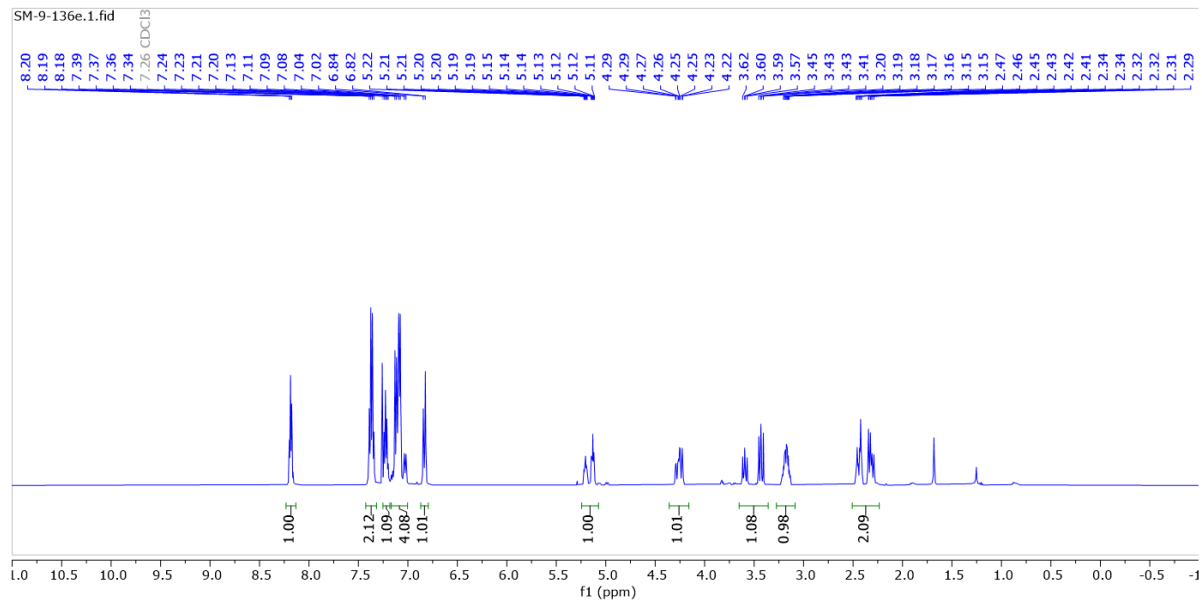

$^1\text{H}$  NMR (500 MHz,  $\text{CDCl}_3$ ) of **3ai**

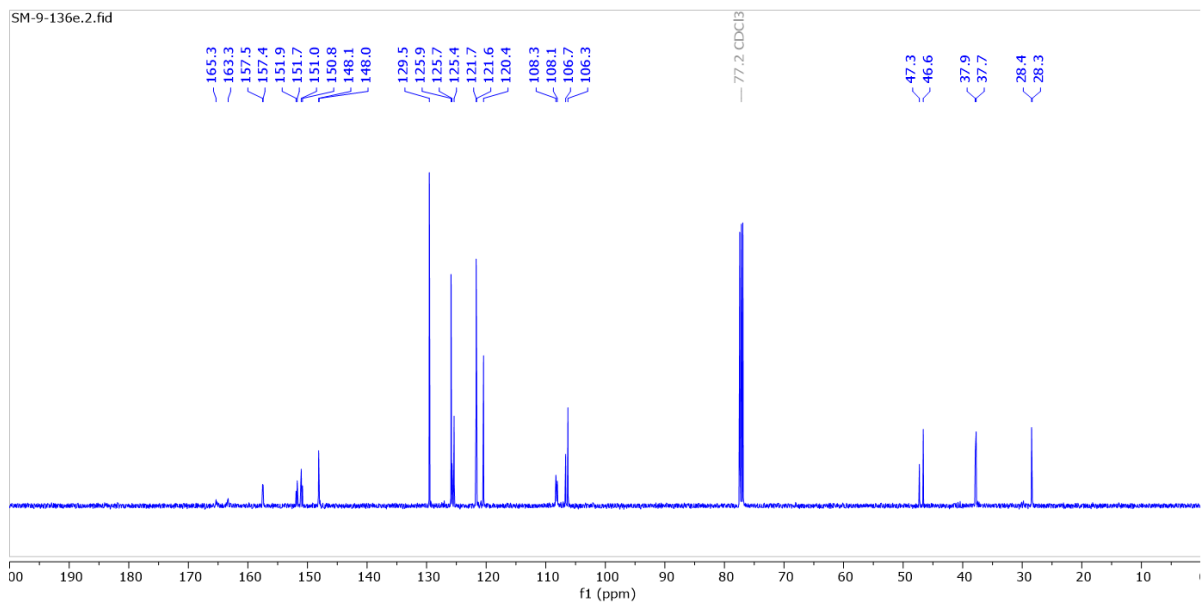

$^{13}\text{C}$  NMR (126 MHz,  $\text{CDCl}_3$ ) of **3ai**

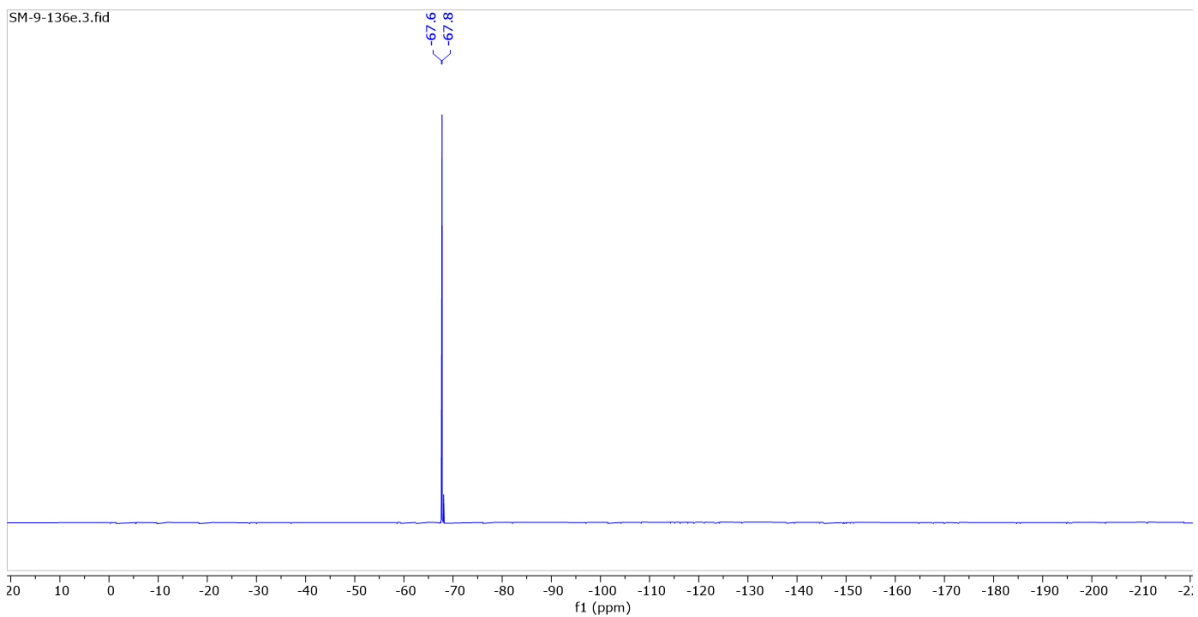

$^{19}\text{F}$  NMR (471 MHz,  $\text{CDCl}_3$ ) of **3ai**

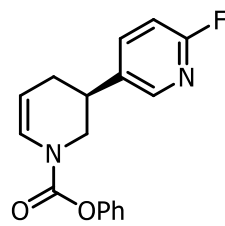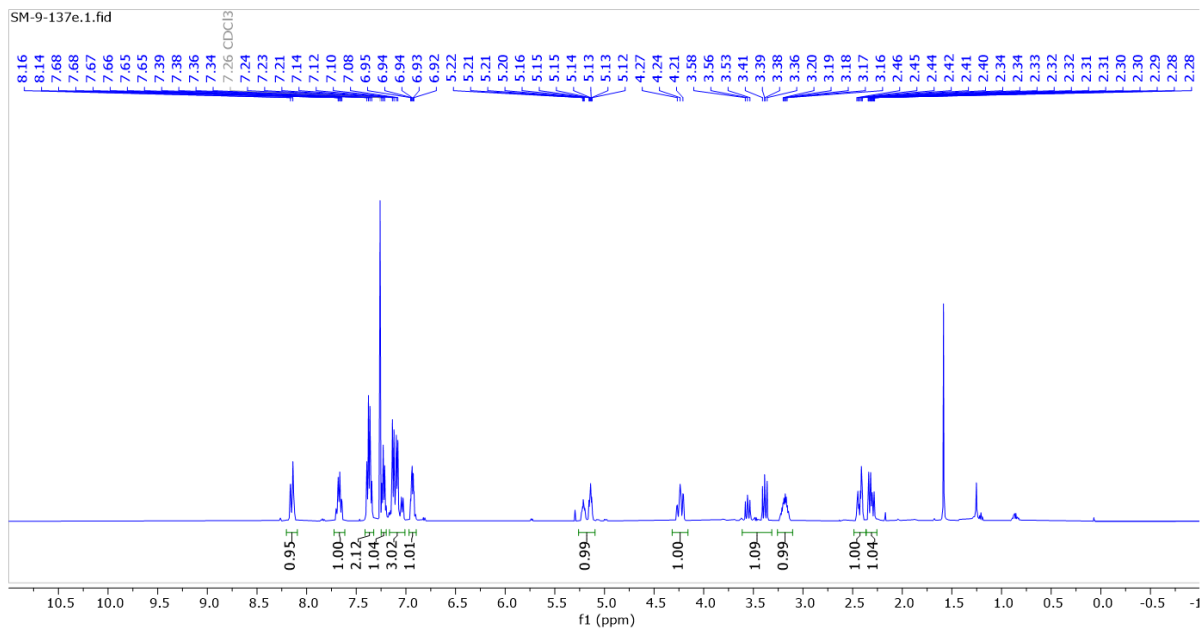

<sup>1</sup>H NMR (500 MHz, CDCl<sub>3</sub>) of **3aj**

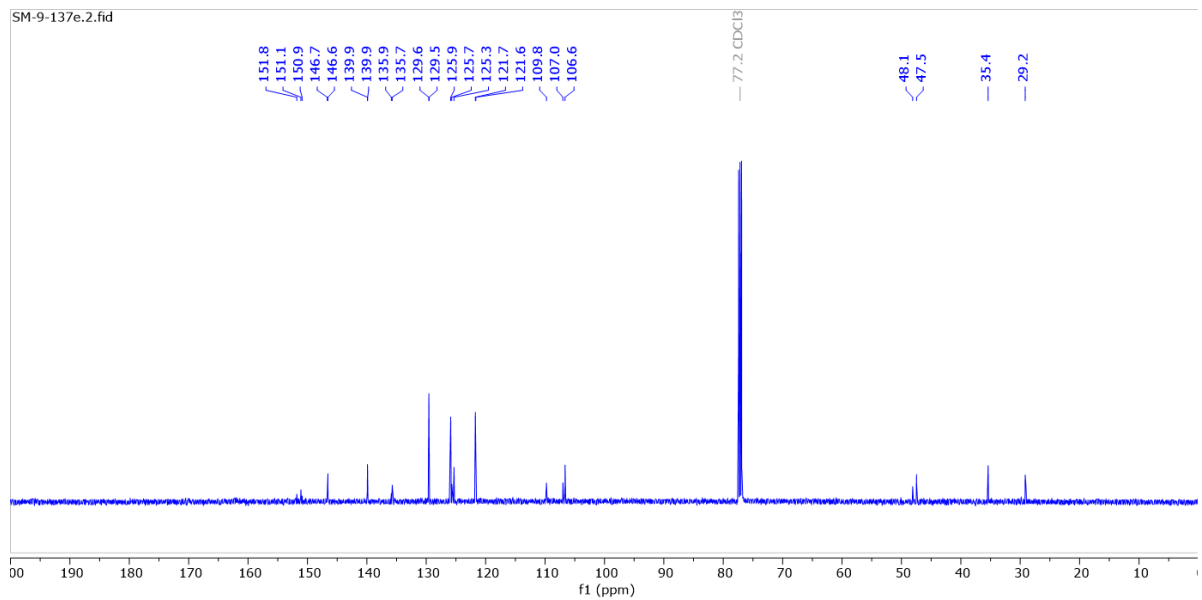

<sup>13</sup>C NMR (126 MHz, CDCl<sub>3</sub>) of **3aj**

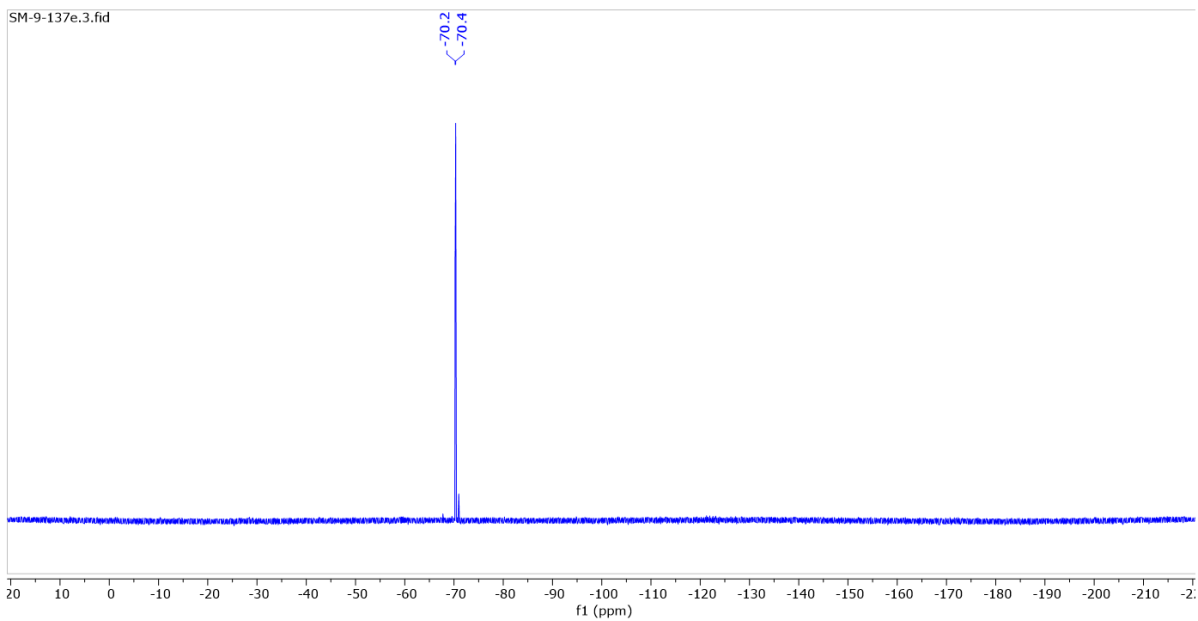

$^{19}\text{F}$  NMR (471 MHz,  $\text{CDCl}_3$ ) of **3aj**

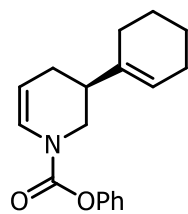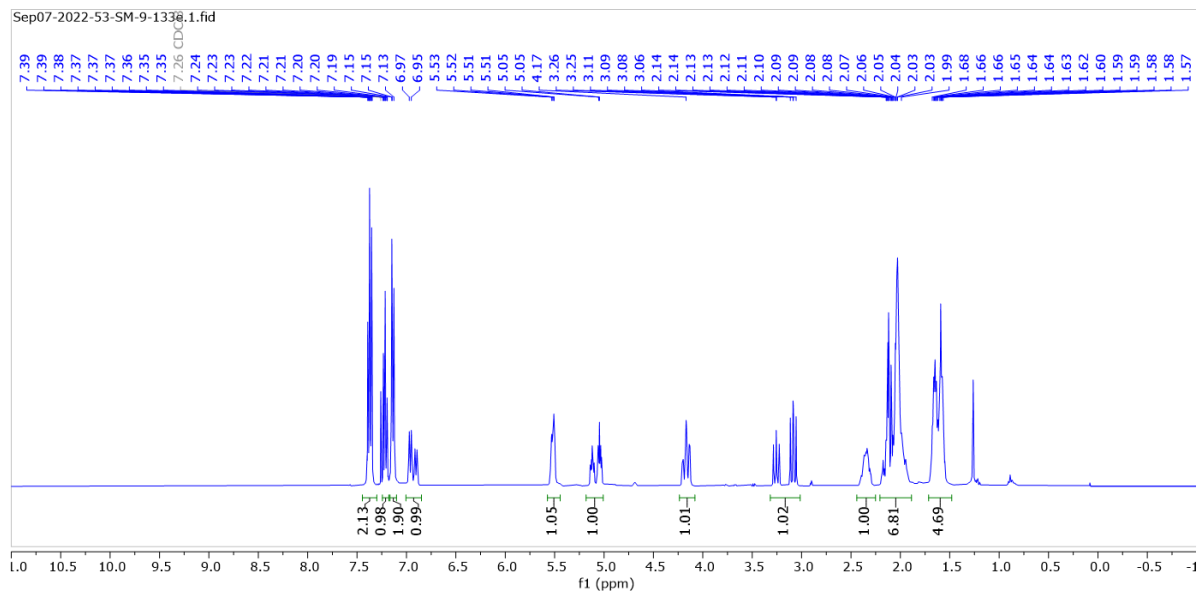

<sup>1</sup>H NMR (400 MHz, CDCl<sub>3</sub>) of 3ak

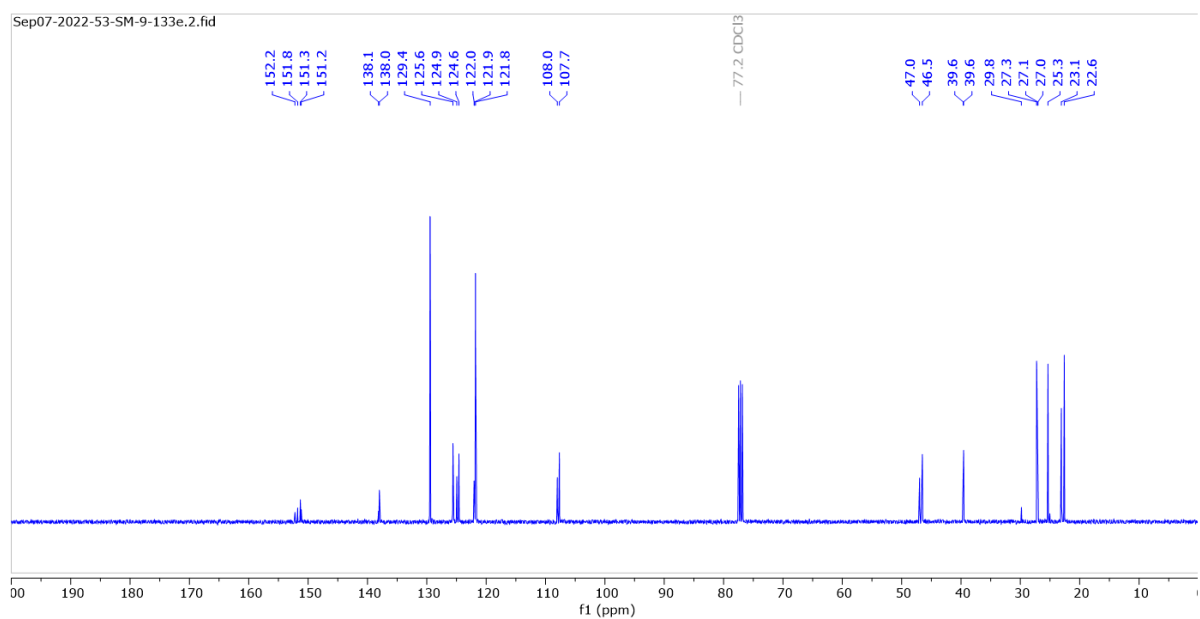

<sup>13</sup>C NMR (101 MHz, CDCl<sub>3</sub>) of 3ak

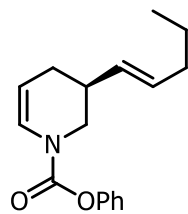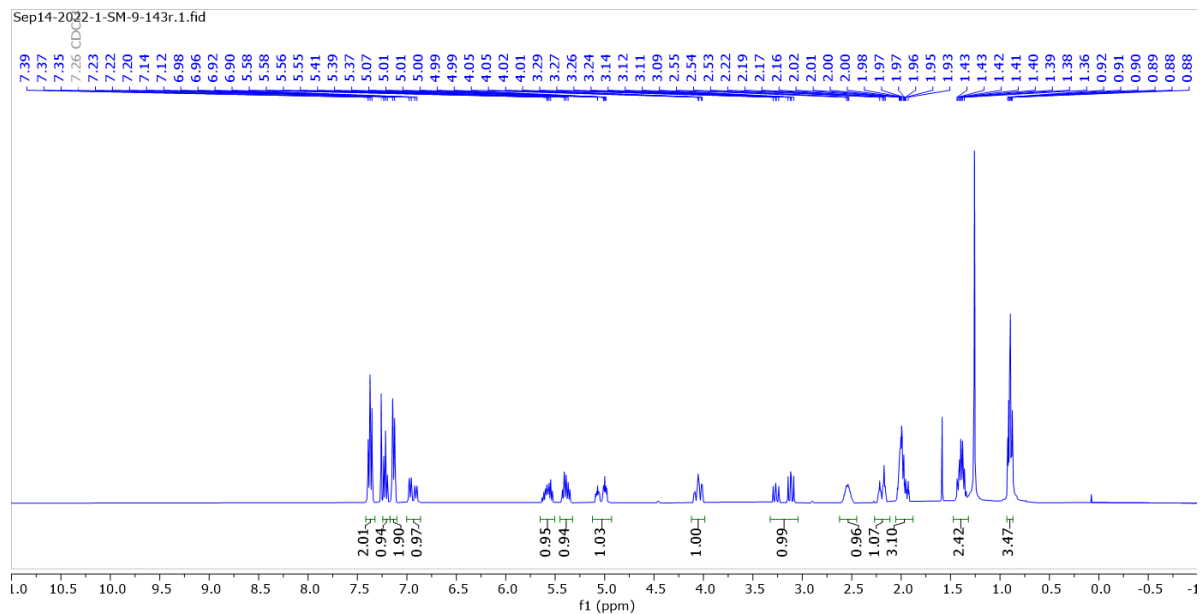

<sup>1</sup>H NMR (400 MHz, CDCl<sub>3</sub>) of **3al**

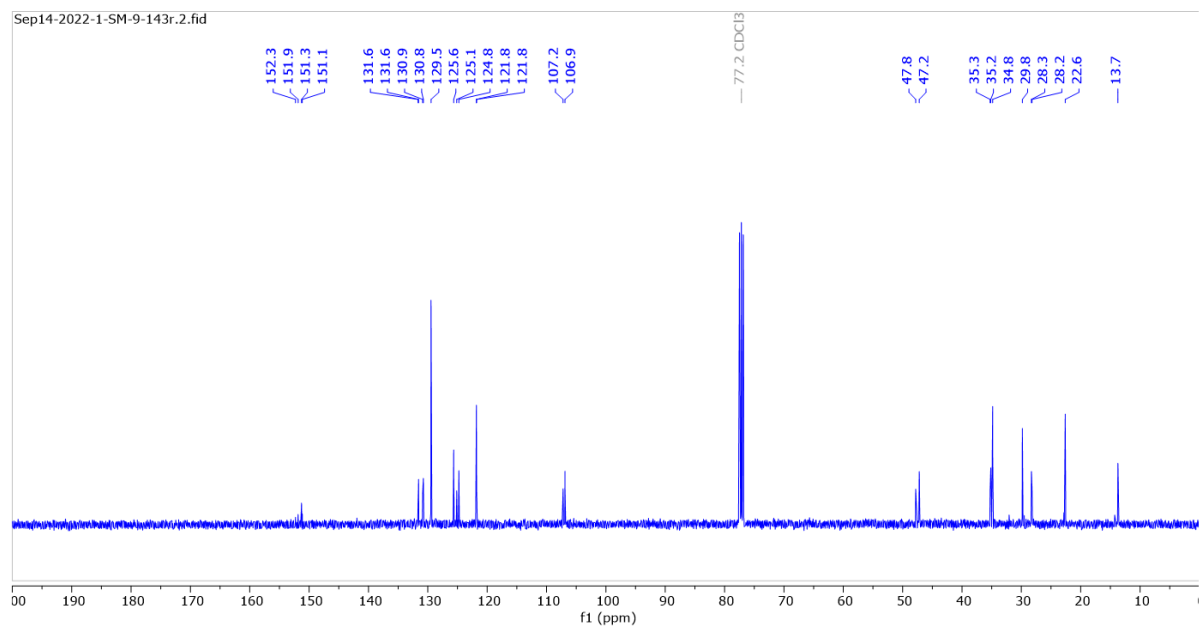

<sup>13</sup>C NMR (101 MHz, CDCl<sub>3</sub>) of **3al**

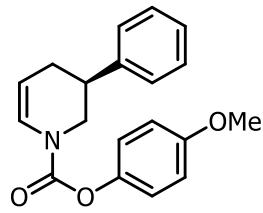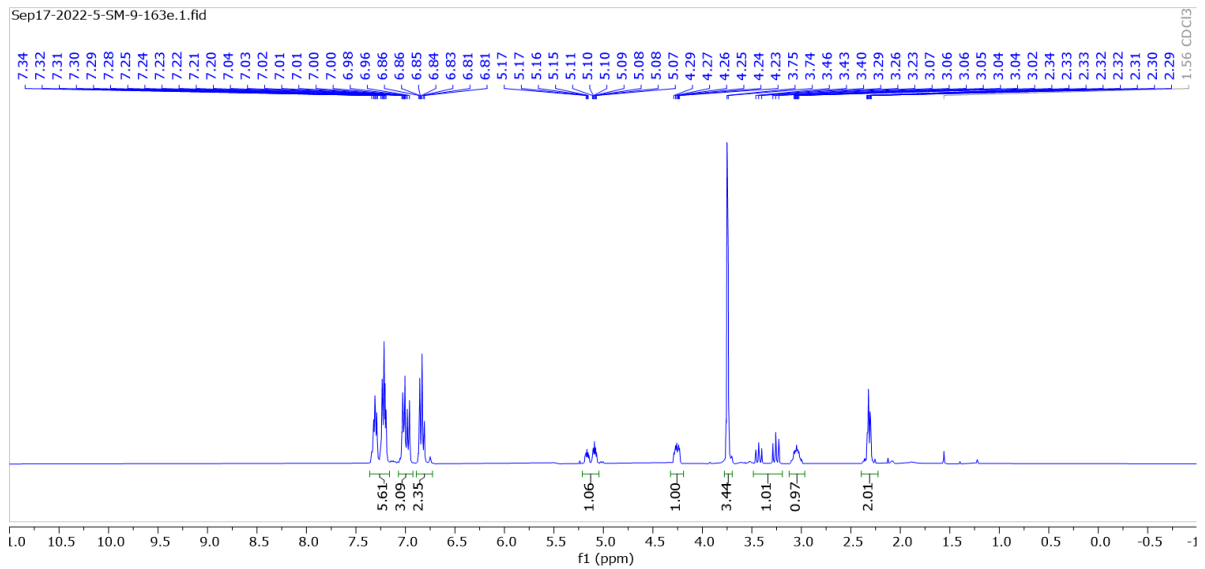

<sup>1</sup>H NMR (400 MHz, CDCl<sub>3</sub>) of 3am

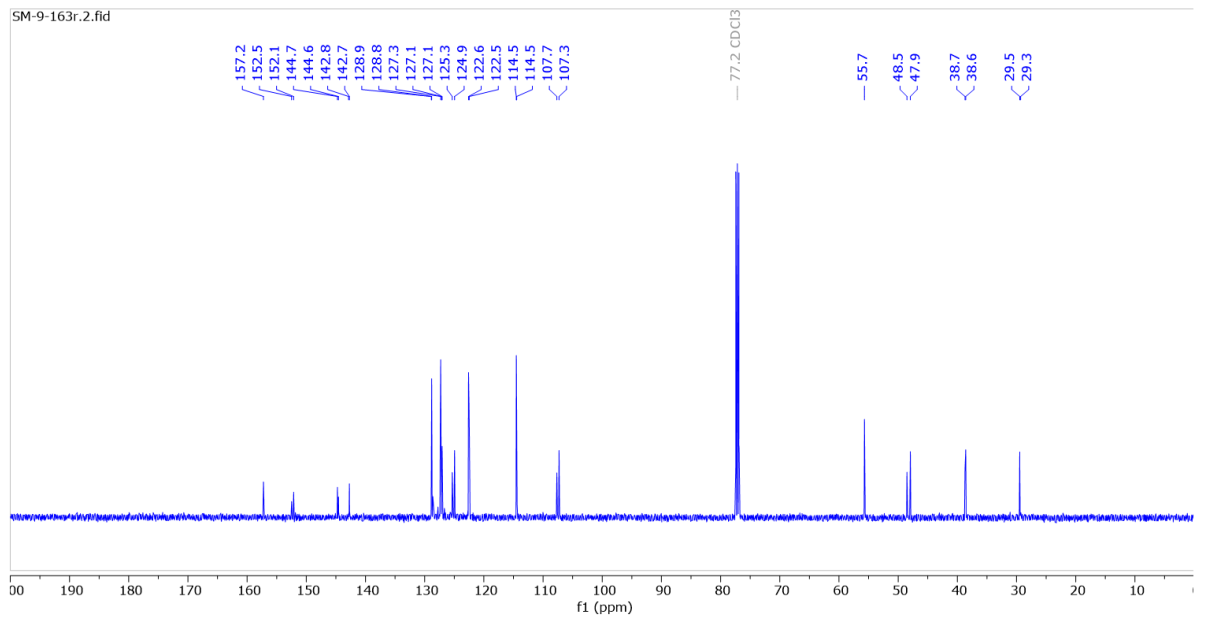

<sup>13</sup>C NMR (126 MHz, CDCl<sub>3</sub>) of 3am



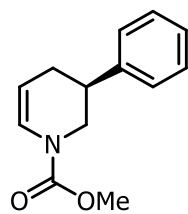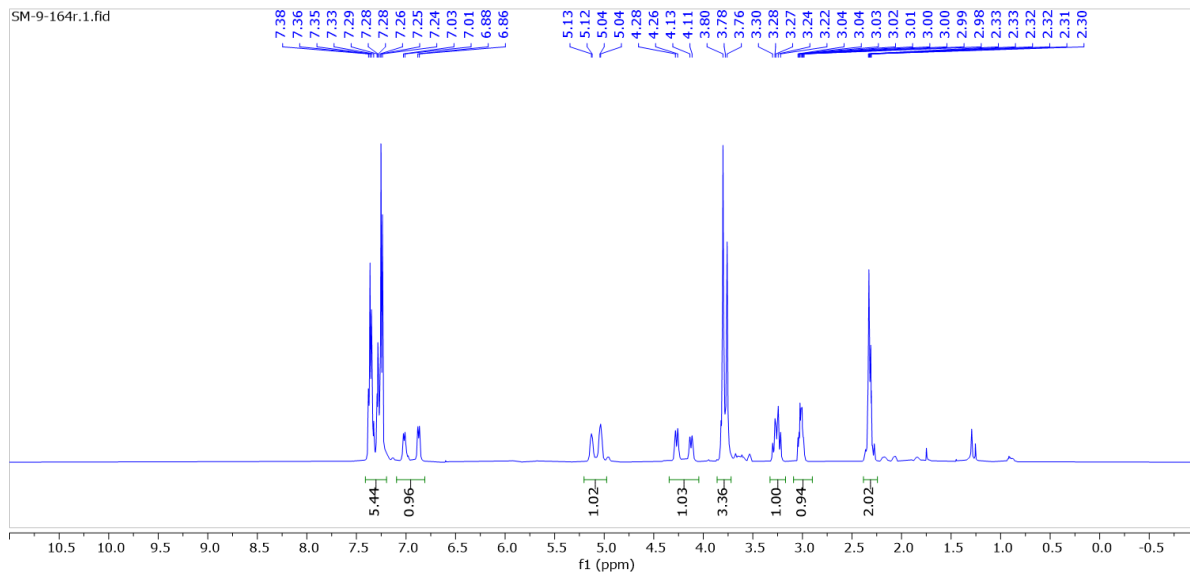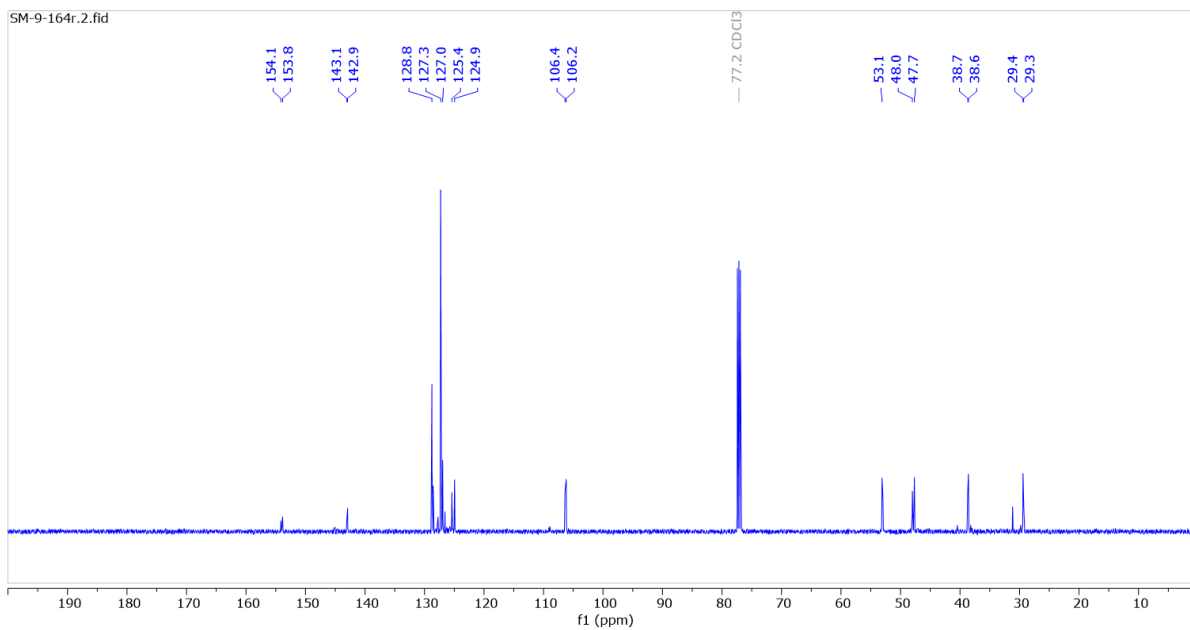

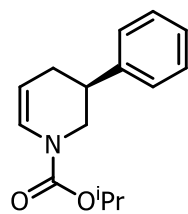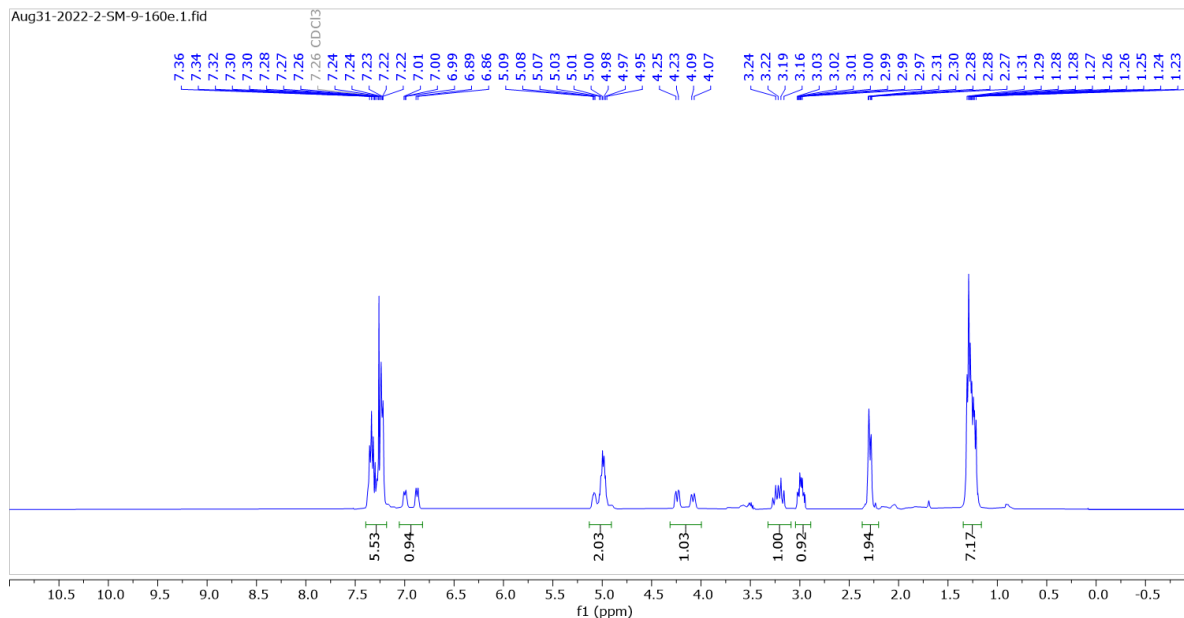

$^1\text{H}$  NMR (400 MHz,  $\text{CDCl}_3$ ) of **3ao**

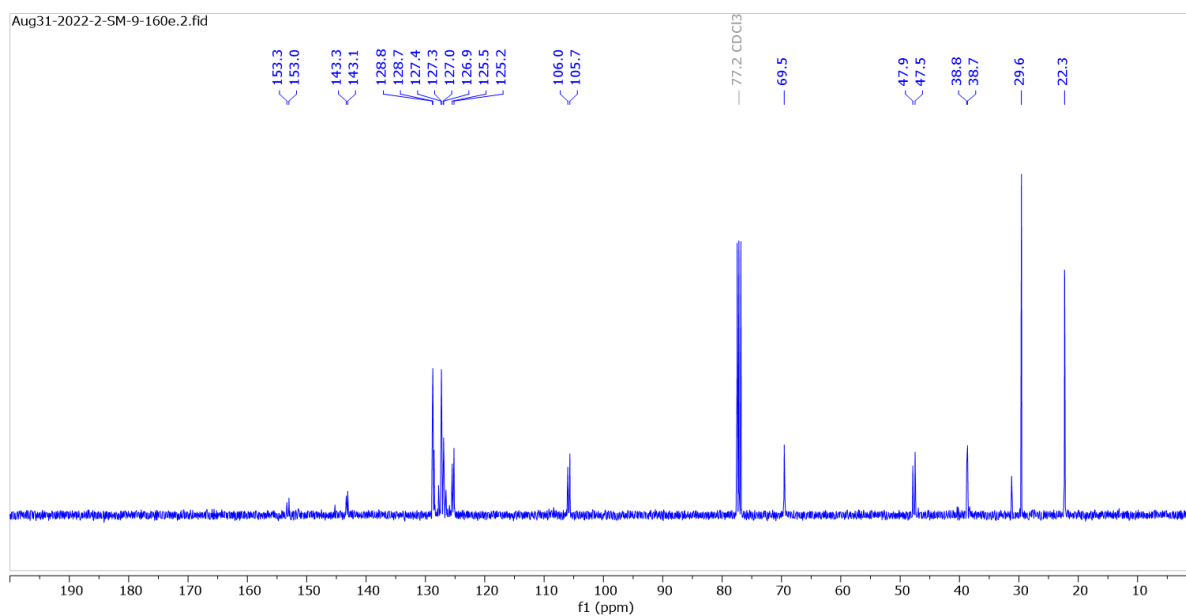

$^{13}\text{C}$  NMR (101 MHz,  $\text{CDCl}_3$ ) of **3ao**

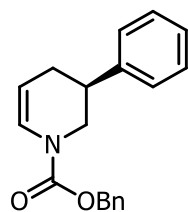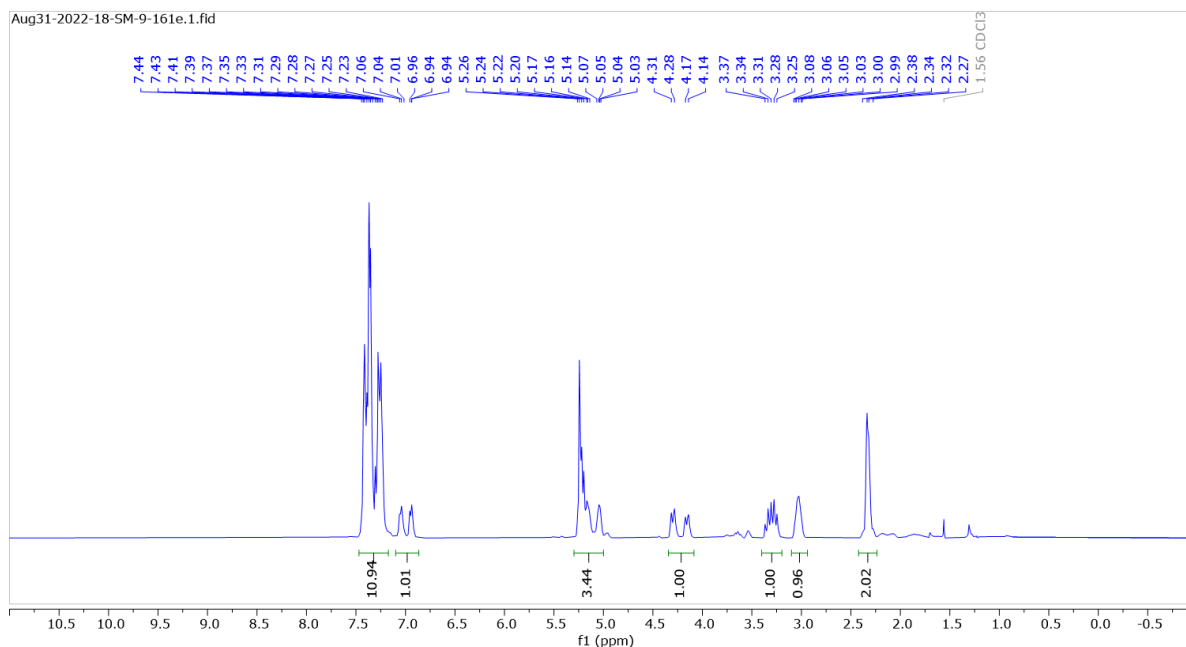

<sup>1</sup>H NMR (400 MHz, CDCl<sub>3</sub>) of 3ap

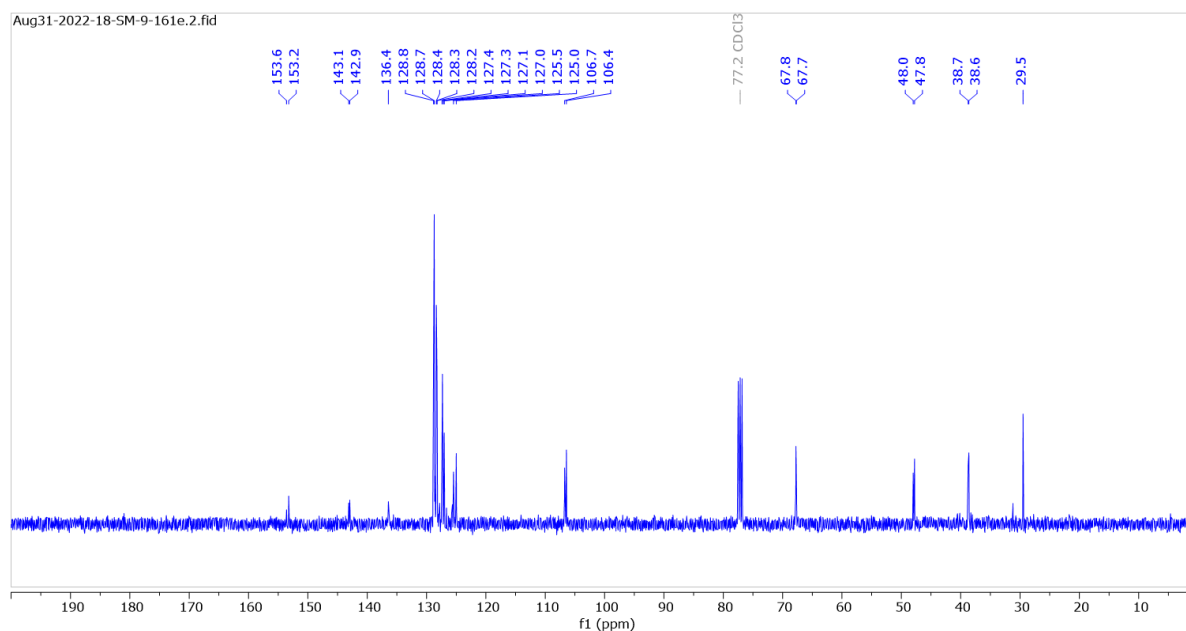

<sup>13</sup>C NMR (101 MHz, CDCl<sub>3</sub>) of 3ap

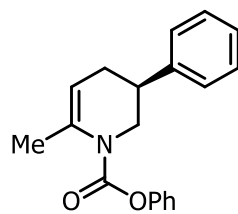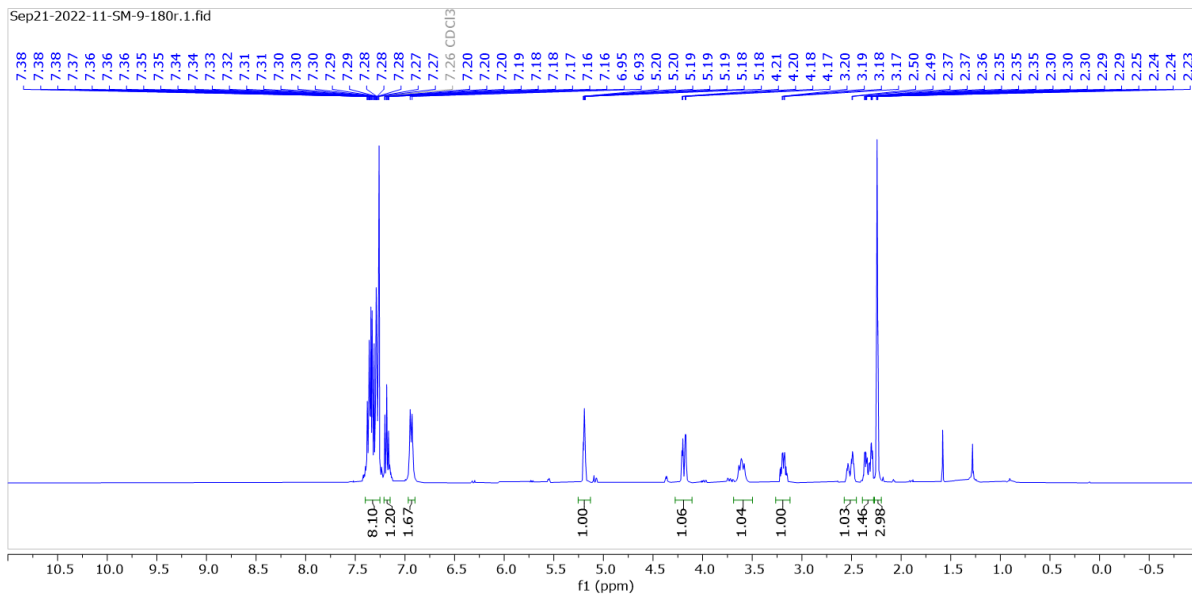

<sup>1</sup>H NMR (400 MHz, CDCl<sub>3</sub>) of **3aq**

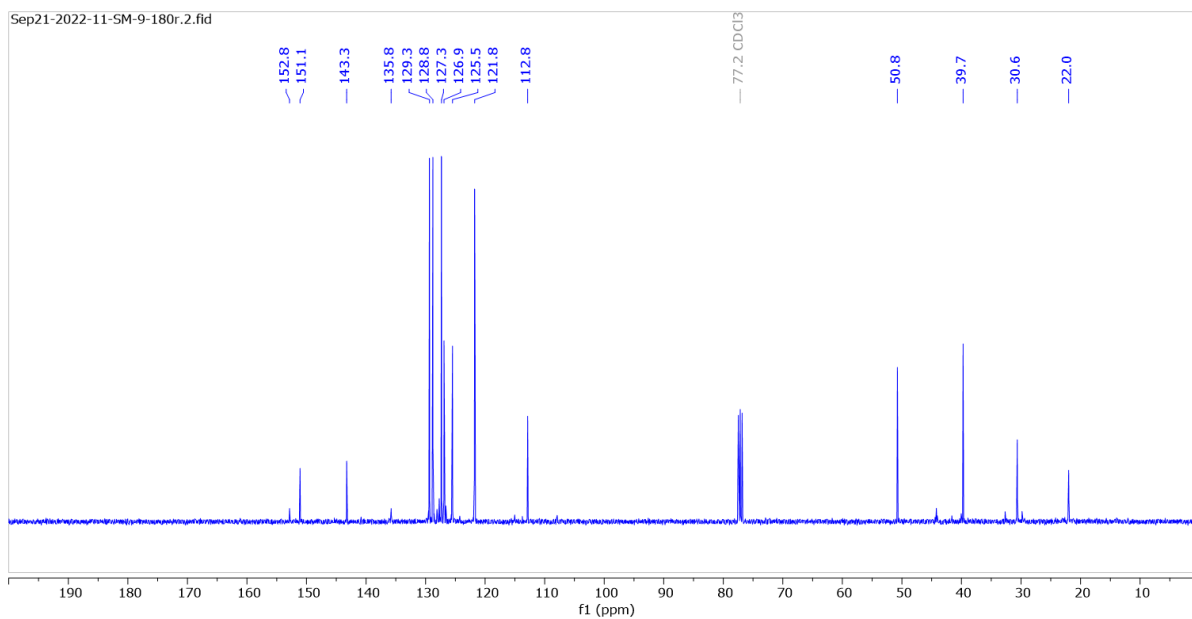

<sup>13</sup>C NMR (101 MHz, CDCl<sub>3</sub>) of **3aq**

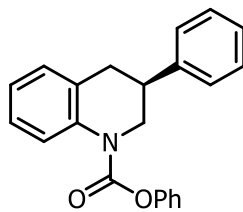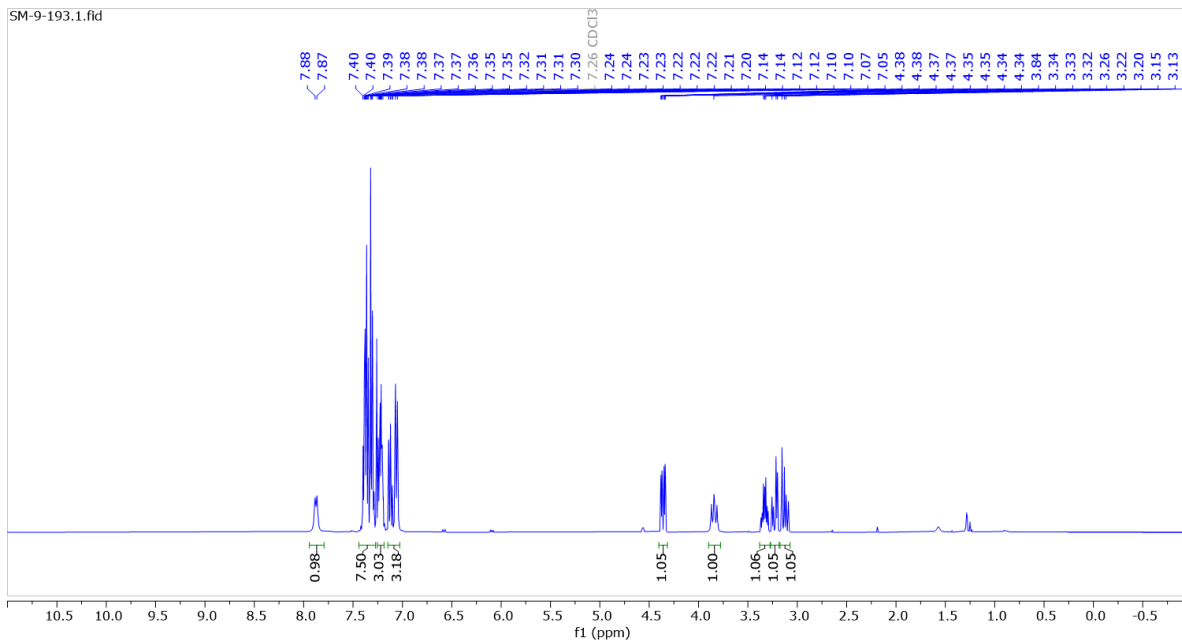

<sup>1</sup>H NMR (400 MHz, CDCl<sub>3</sub>) of **3as**

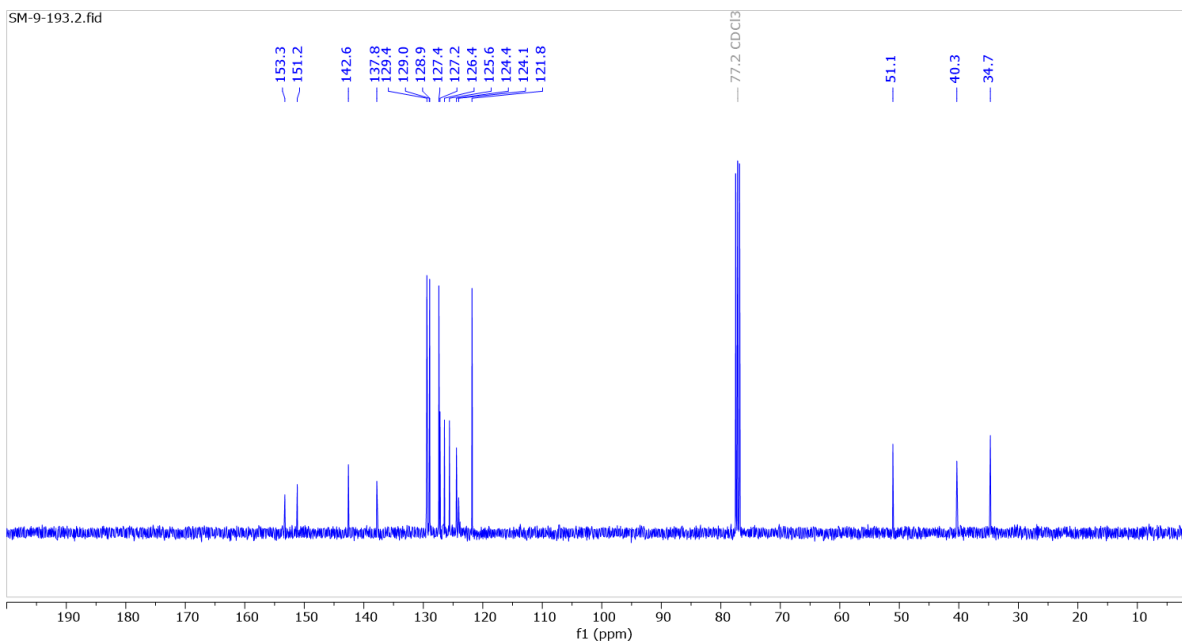

<sup>13</sup>C NMR (101 MHz, CDCl<sub>3</sub>) of **3as**

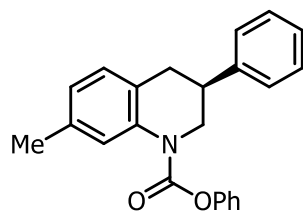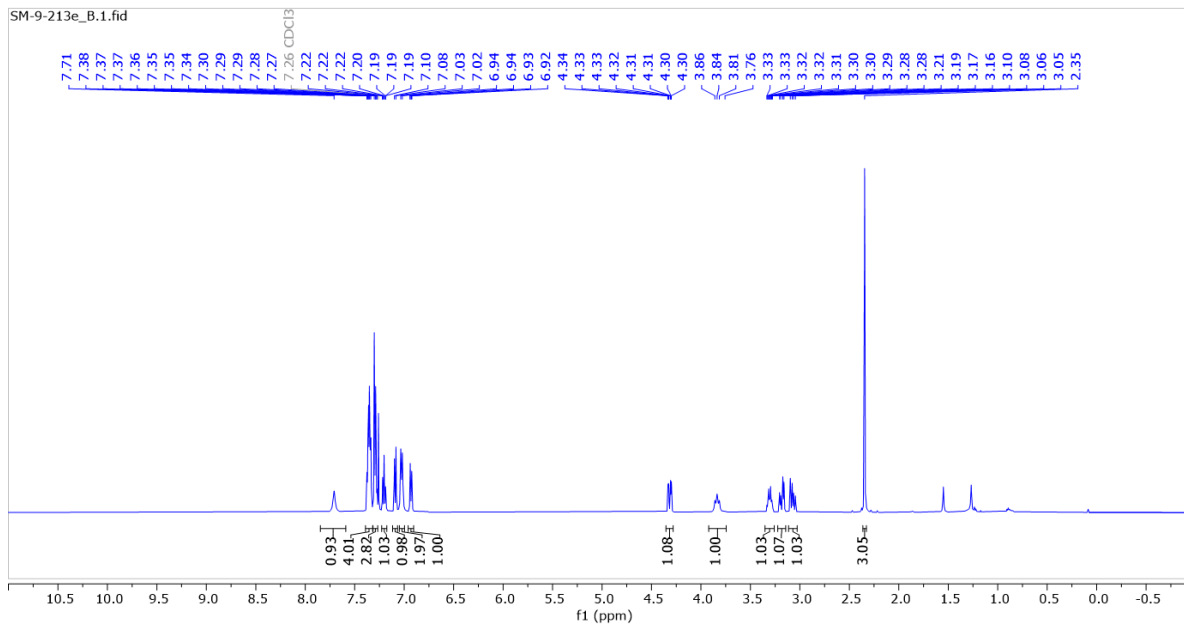

<sup>1</sup>H NMR (500 MHz, CDCl<sub>3</sub>) of 3at

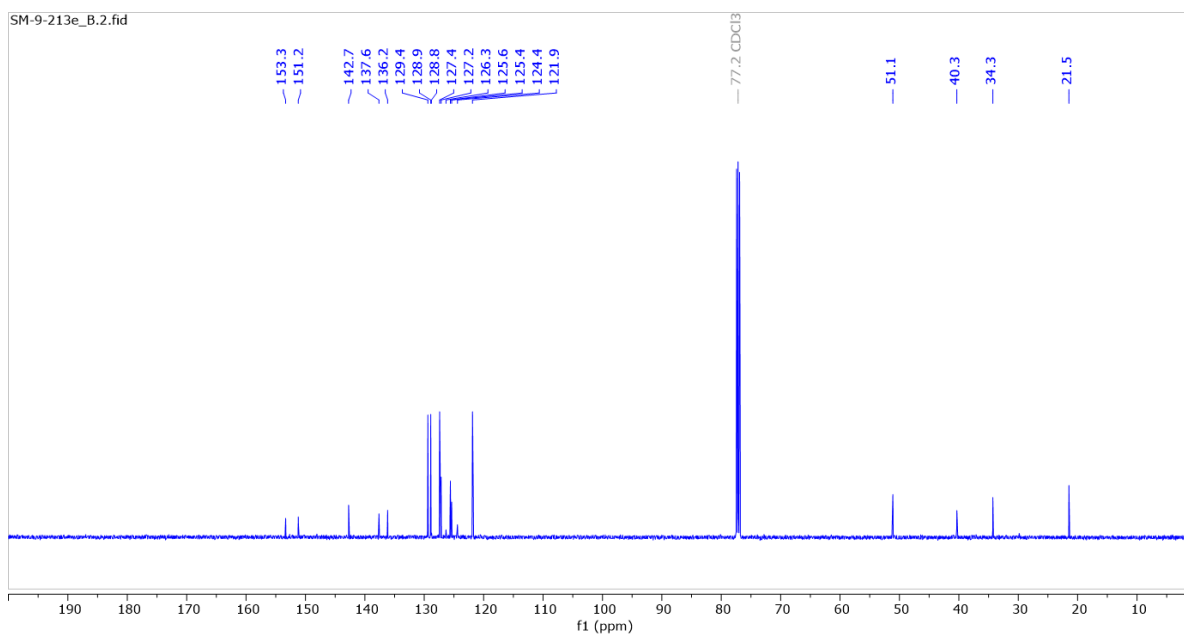

<sup>13</sup>C NMR (126 MHz, CDCl<sub>3</sub>) of 3at

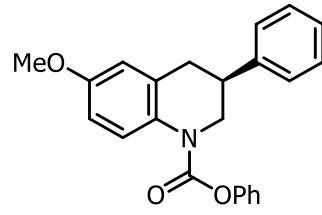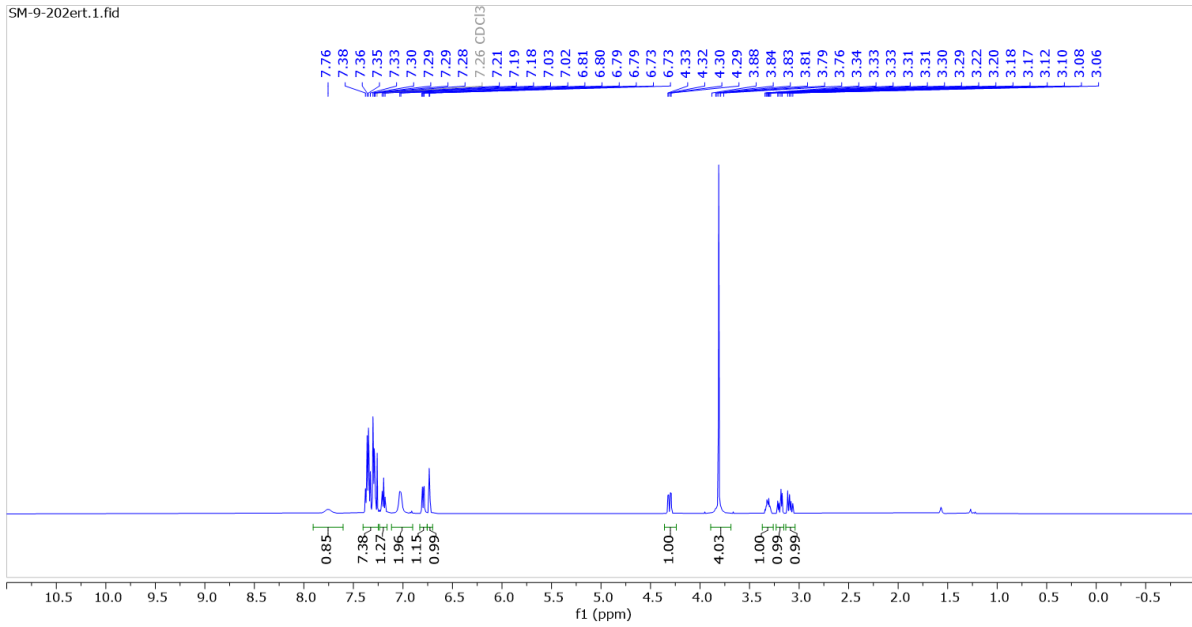

<sup>1</sup>H NMR (500 MHz, CDCl<sub>3</sub>) of 3au

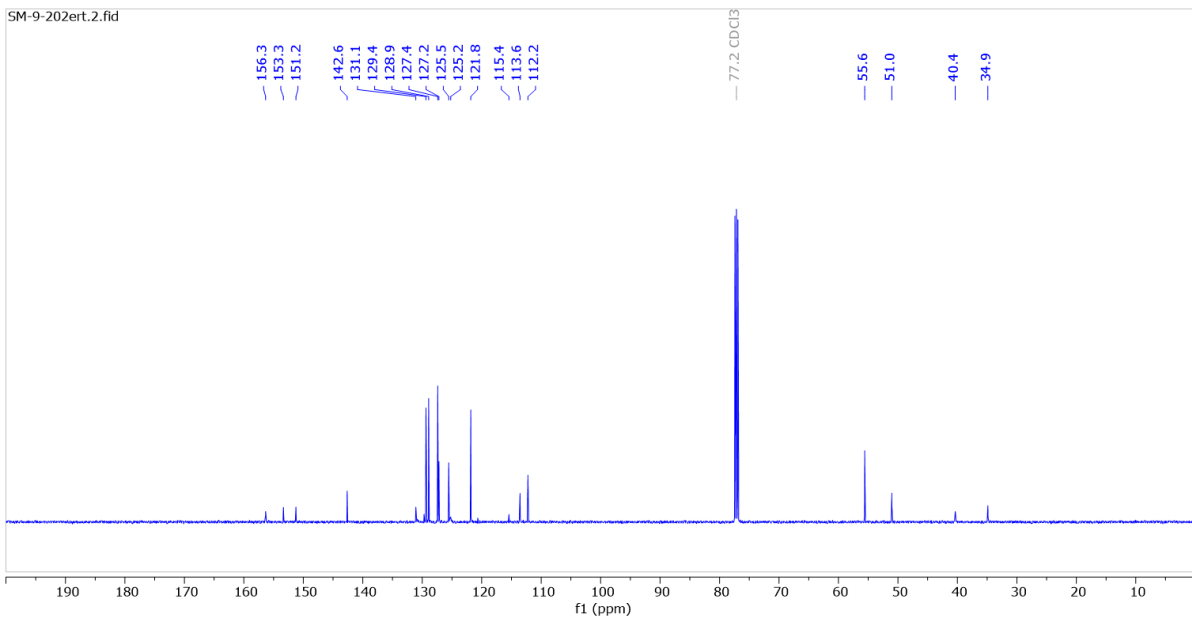

<sup>13</sup>C NMR (126 MHz, CDCl<sub>3</sub>) of 3au

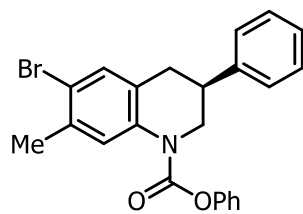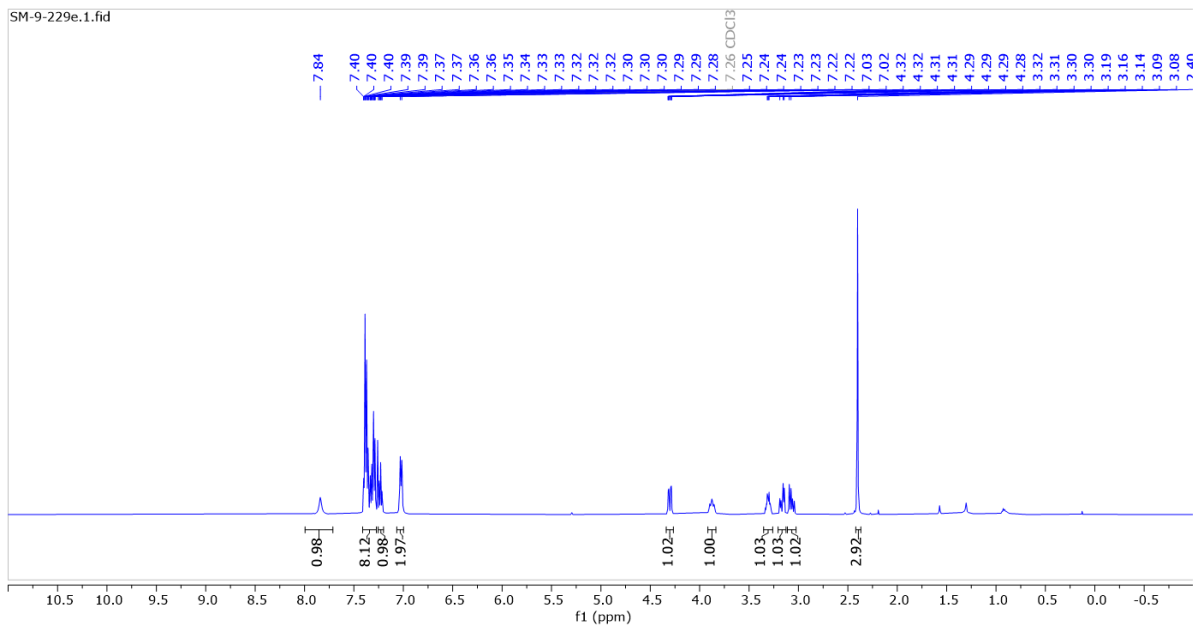

<sup>1</sup>H NMR (500 MHz, CDCl<sub>3</sub>) of **3av**

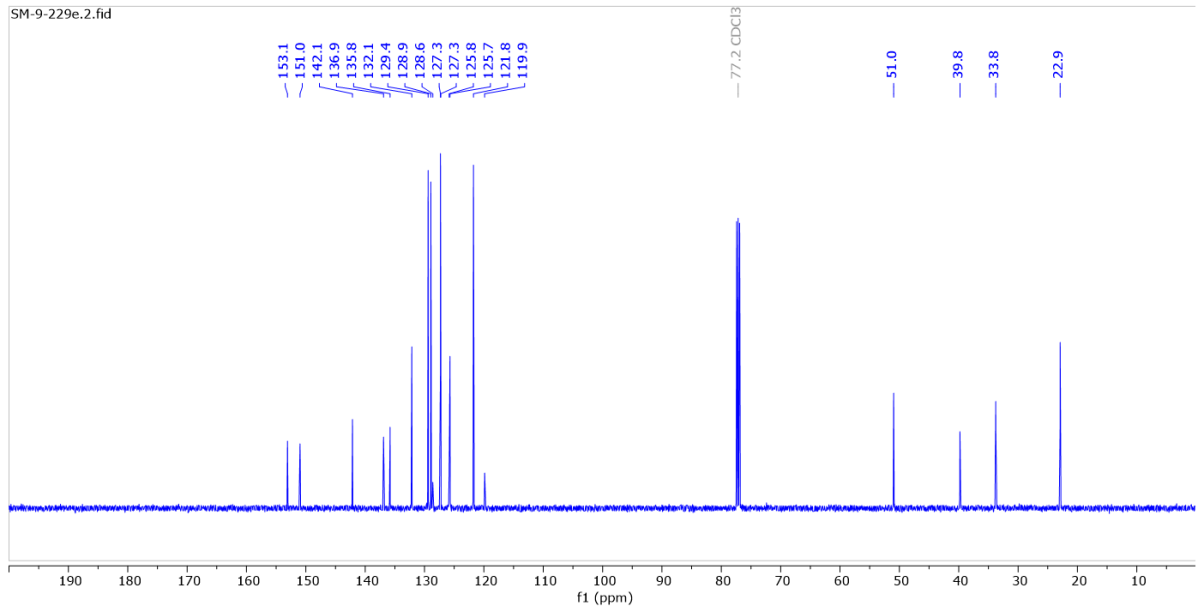

<sup>13</sup>C NMR (126 MHz, CDCl<sub>3</sub>) of **3av**



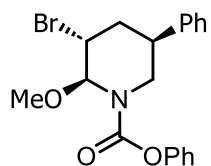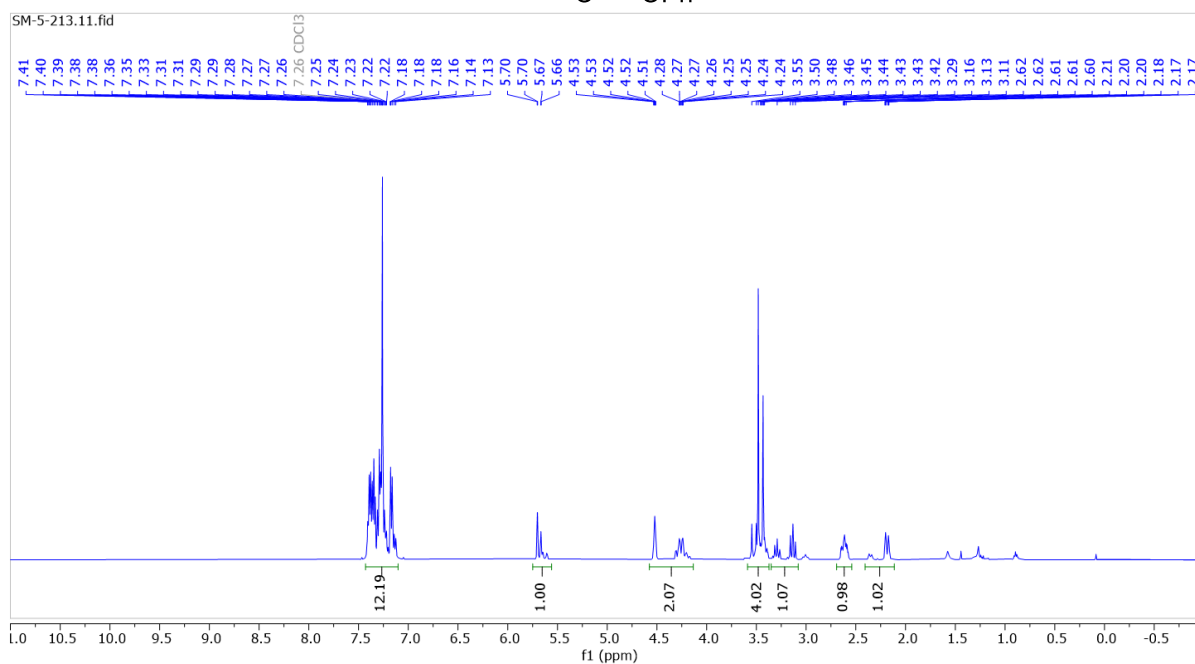

<sup>1</sup>H NMR (500 MHz, CDCl<sub>3</sub>) of **4**

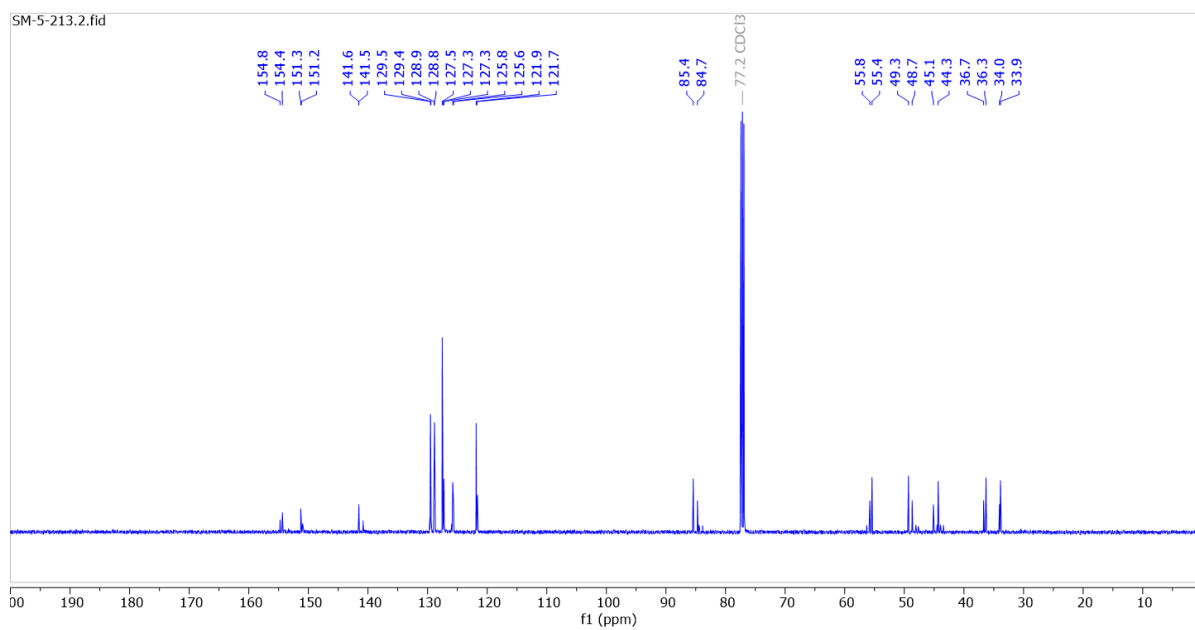

<sup>13</sup>C NMR (126 MHz, CDCl<sub>3</sub>) of **4**

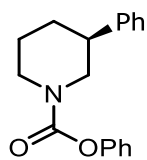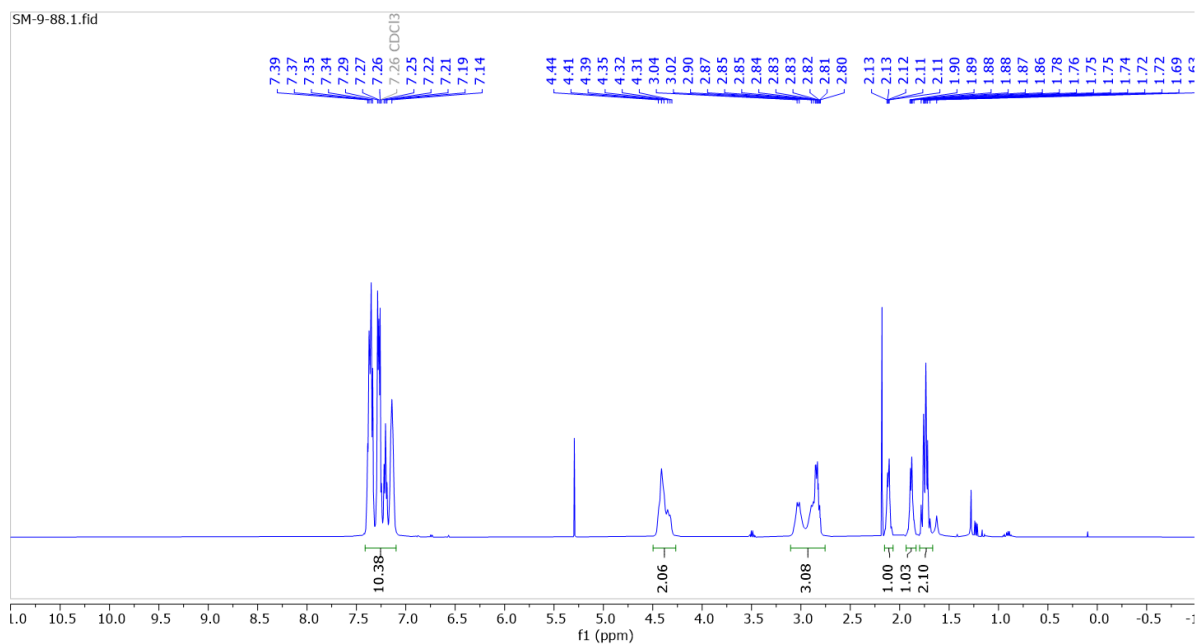

<sup>1</sup>H NMR (400 MHz, CDCl<sub>3</sub>) of **S13**

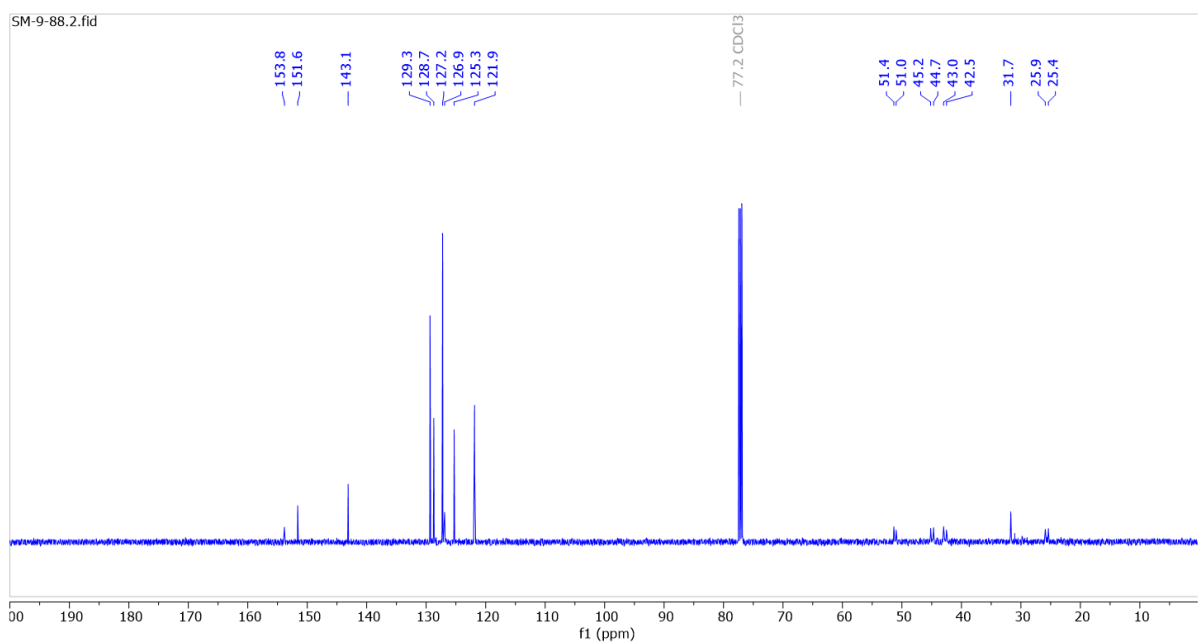

<sup>13</sup>C NMR (101 MHz, CDCl<sub>3</sub>) of **S13**

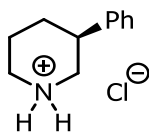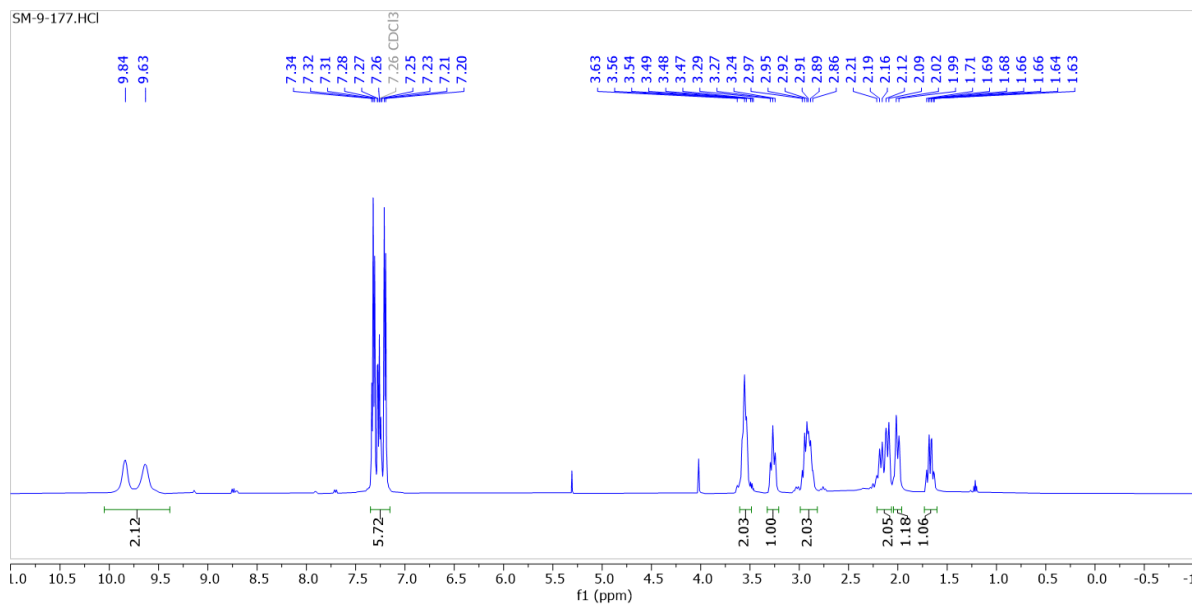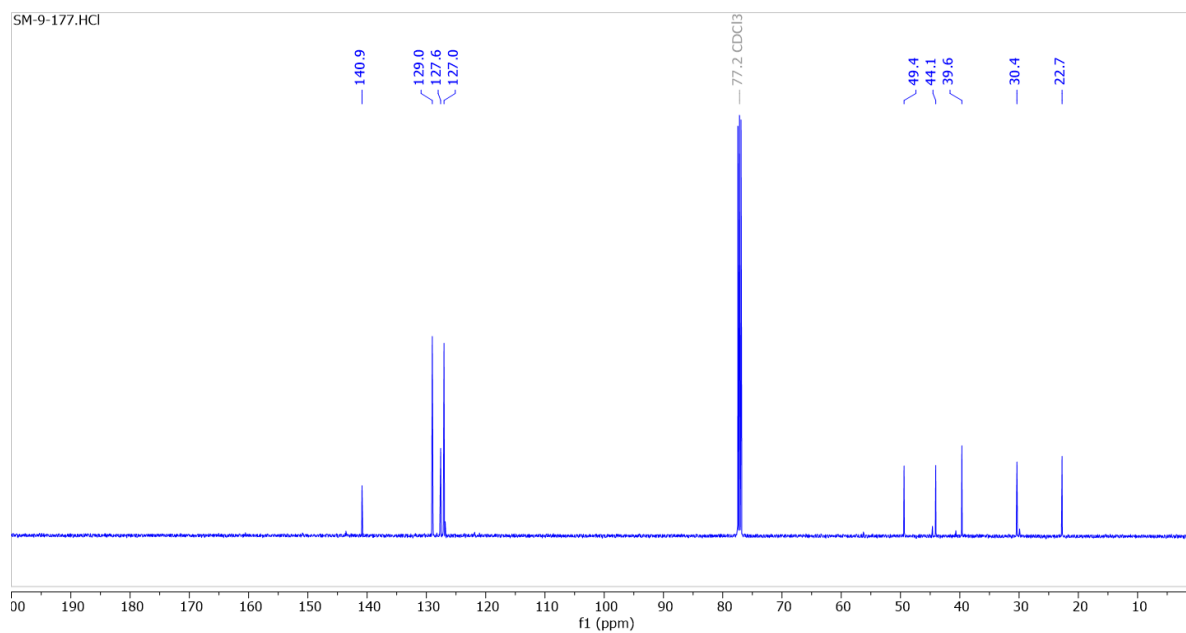

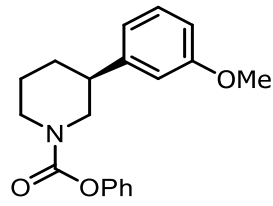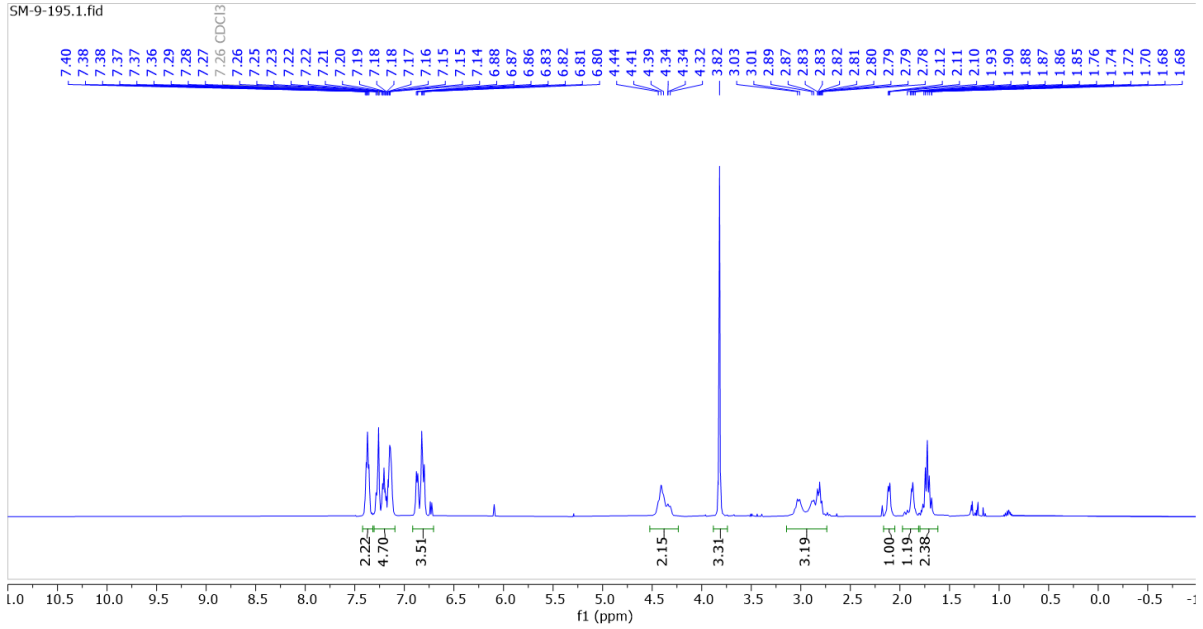

<sup>1</sup>H NMR (400 MHz, CDCl<sub>3</sub>) of S14

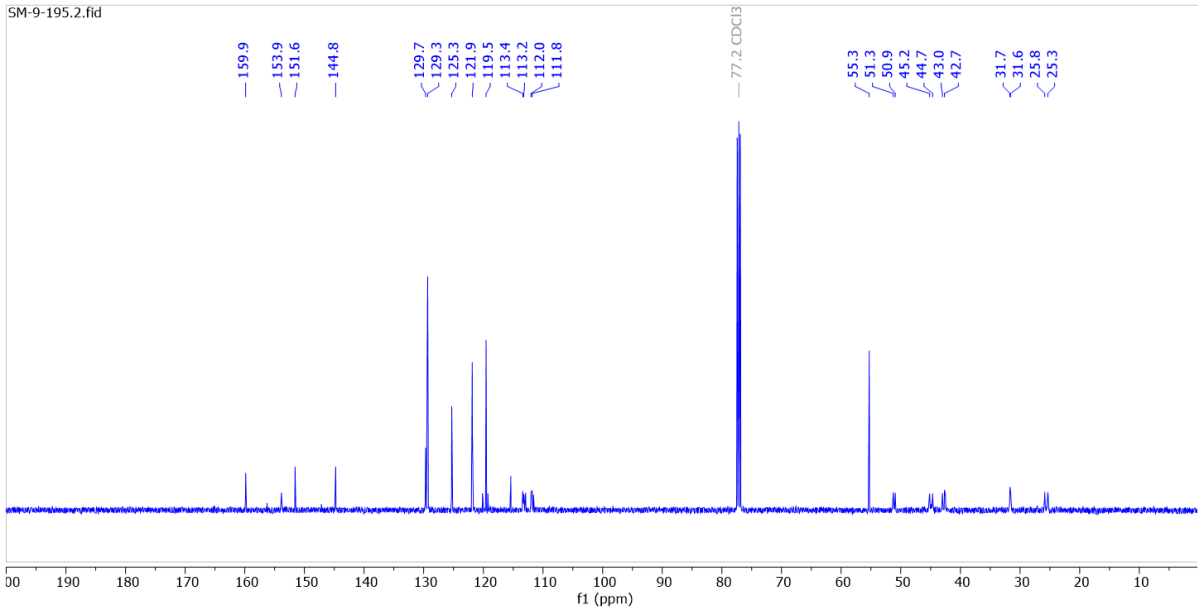

<sup>13</sup>C NMR (101 MHz, CDCl<sub>3</sub>) of S14

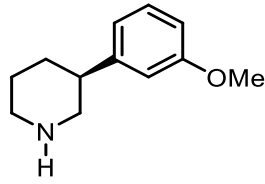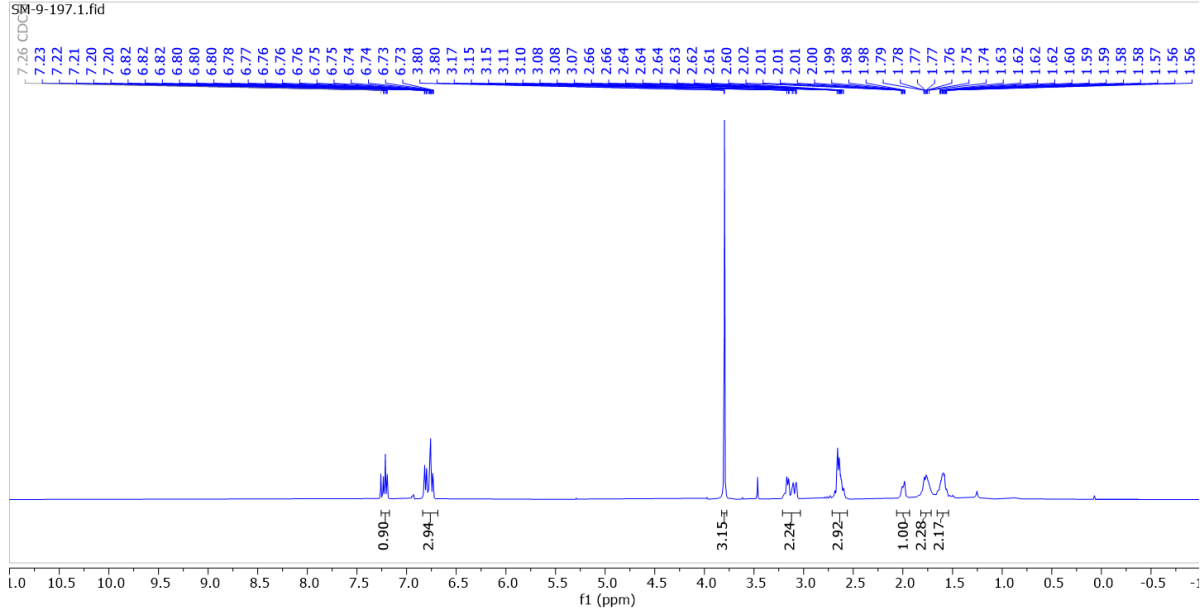

$^1\text{H}$  NMR (400 MHz,  $\text{CDCl}_3$ ) of **6**

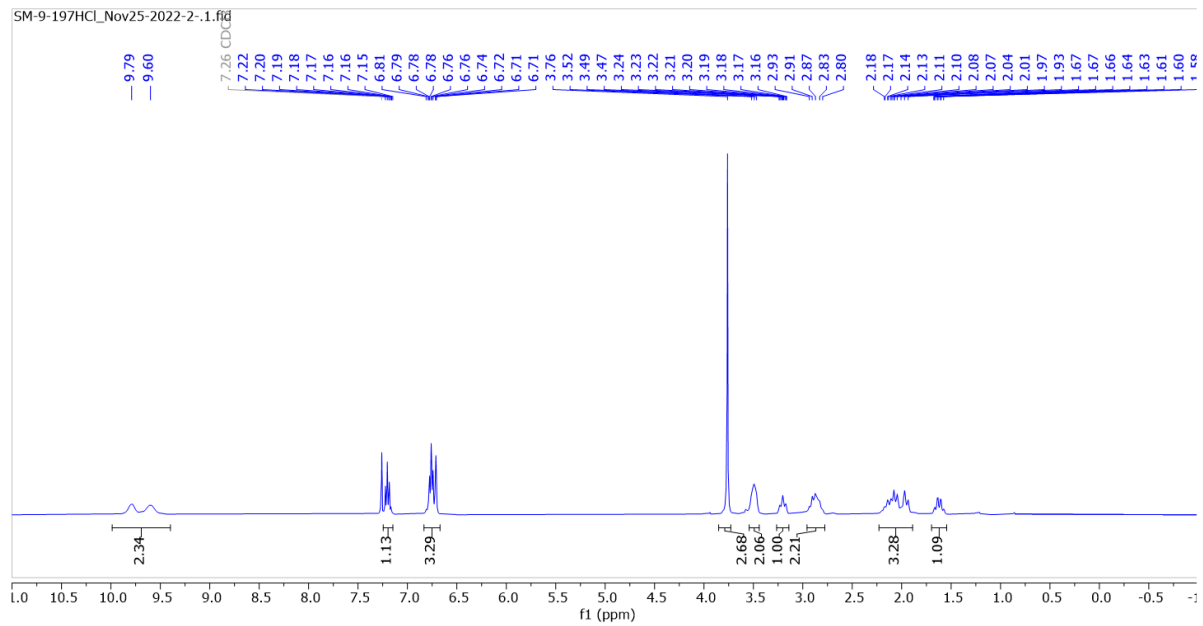

$^1\text{H}$  NMR (400 MHz,  $\text{CDCl}_3$ ) of **6.HCl**

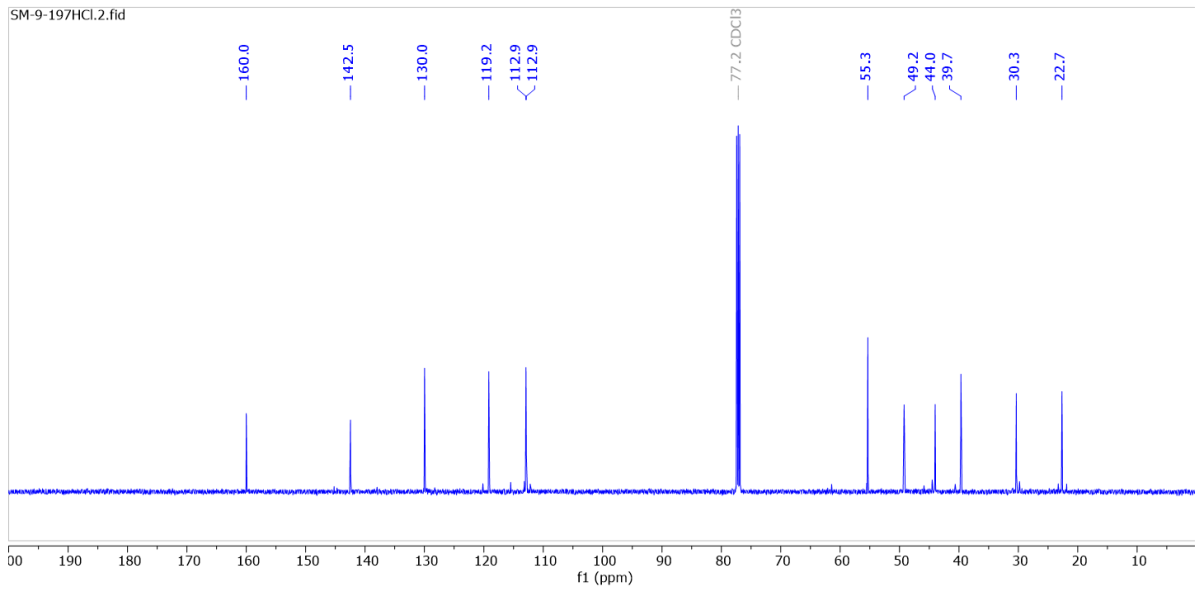

$^{13}\text{C}$  NMR (126 MHz,  $\text{CDCl}_3$ ) of **6.HCl**

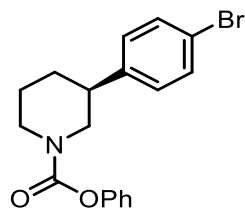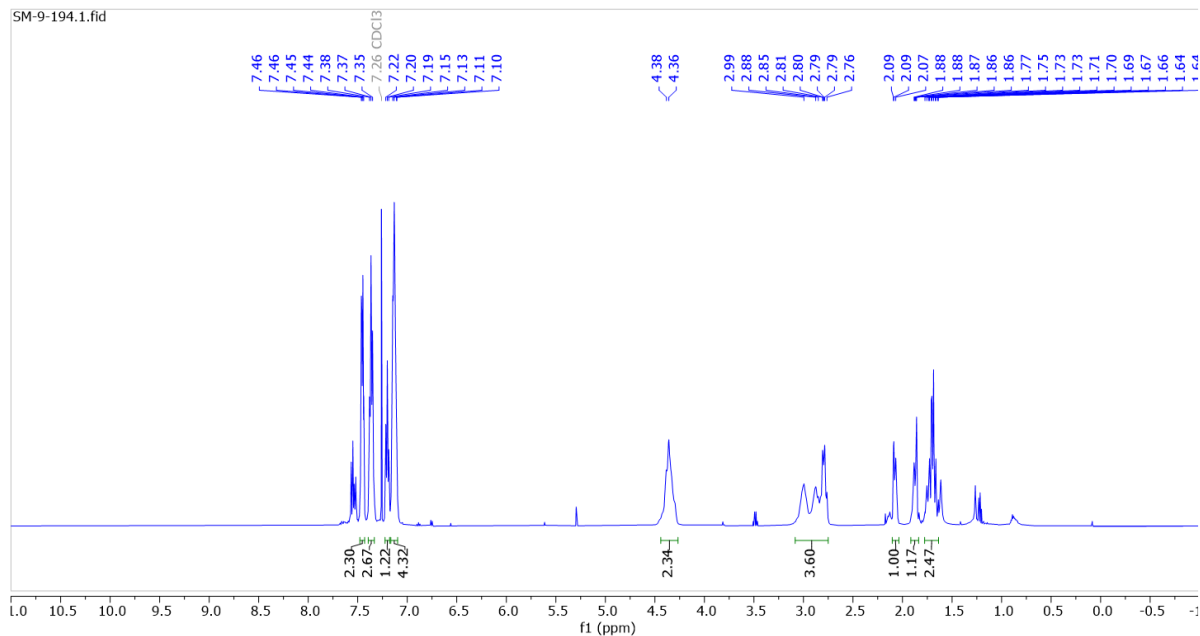

<sup>1</sup>H NMR (500 MHz, CDCl<sub>3</sub>) of S15

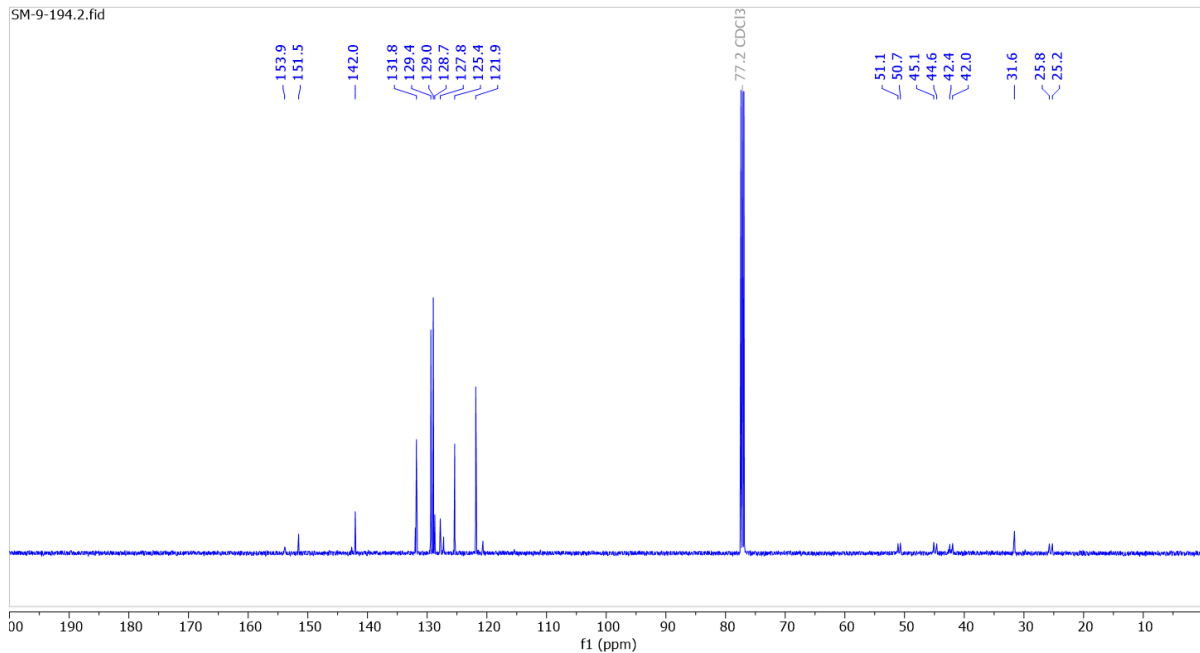

<sup>13</sup>C NMR (126 MHz, CDCl<sub>3</sub>) of S15

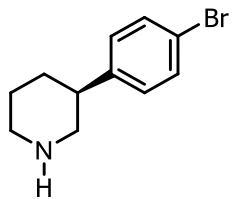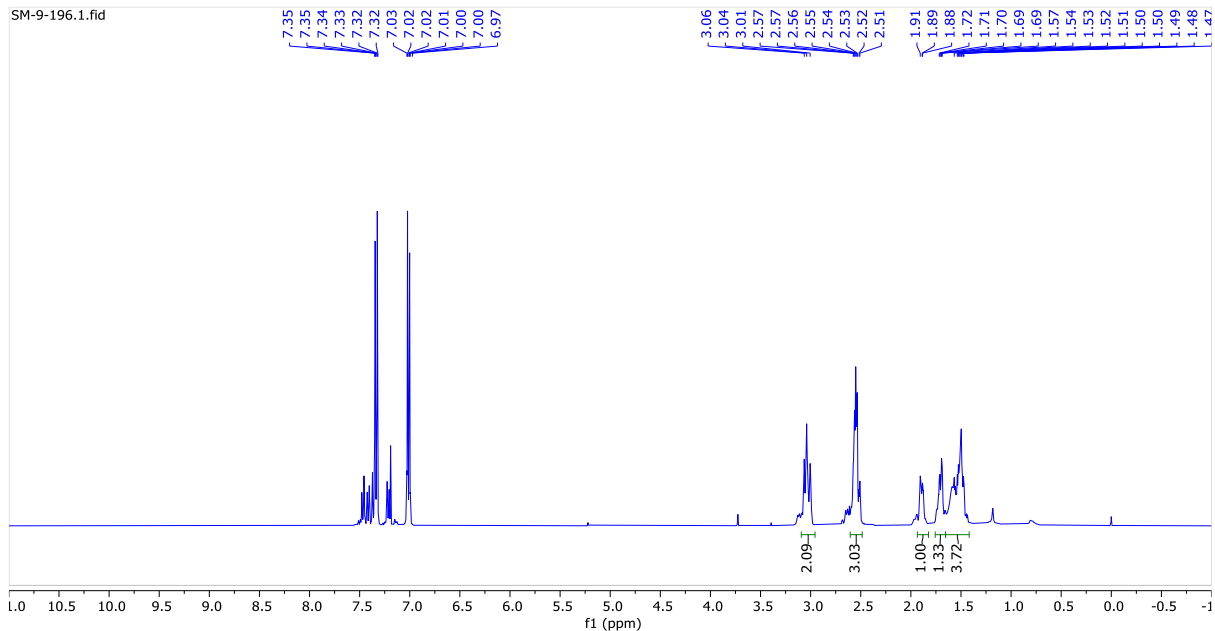

$^1\text{H}$  NMR (400 MHz,  $\text{CDCl}_3$ ) of **7**

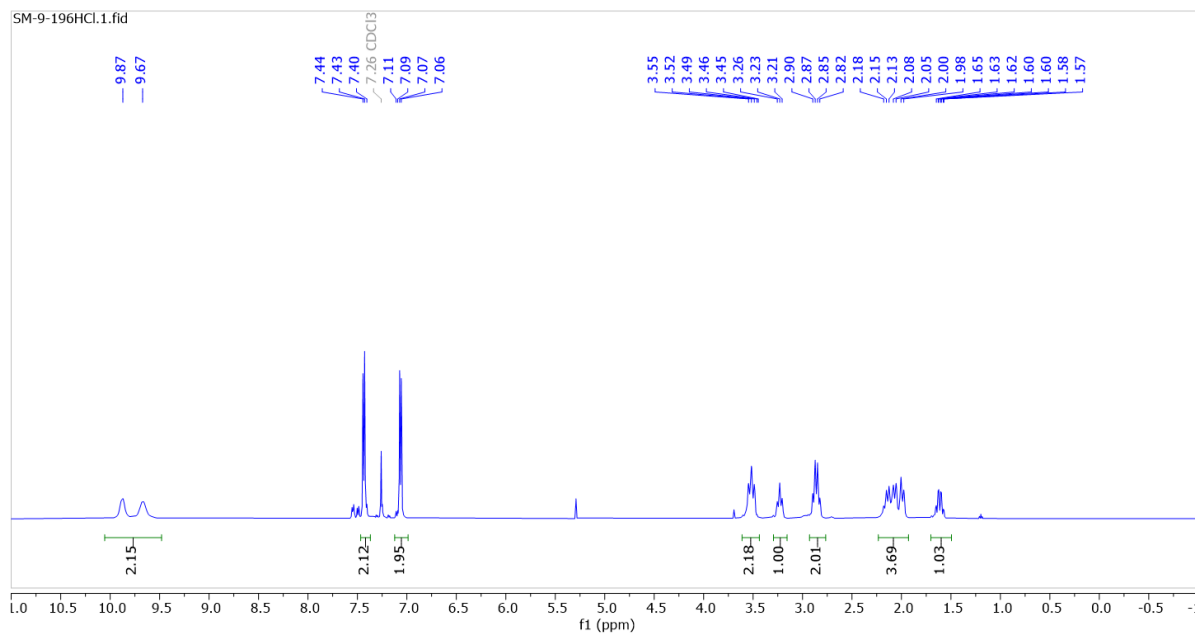

$^1\text{H}$  NMR (500 MHz,  $\text{CDCl}_3$ ) of **7.HCl**



SM-9-196HCl.2.fid

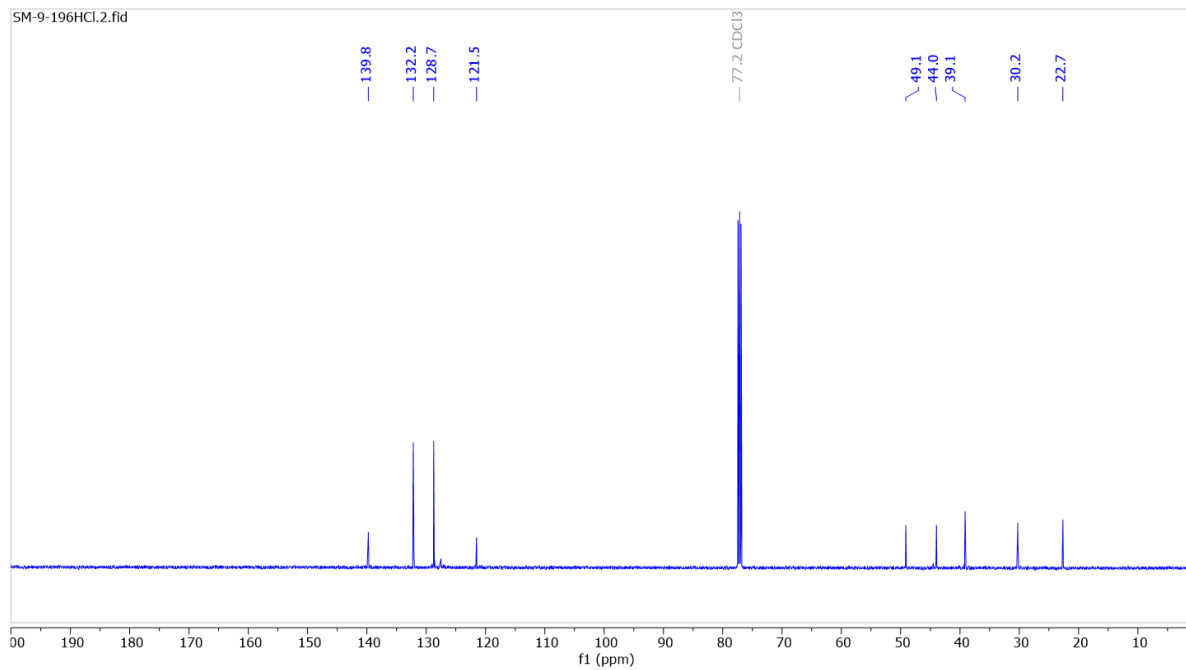

$^{13}\text{C}$  NMR (126 MHz,  $\text{CDCl}_3$ ) of **7.HCl**
